# Supplementary material for: A closer look at amyloid ligands, and what they tell us about protein aggregates
Source: Royal Society of Chemistry journal article supplement (doi:10.1039/d3cs00518f), 2023-12-20
Supplement: d3cs00518f1.csv [file d3cs00518f1.csv]

Compound	SMILES	DOI	Patent number	Kd / nM	Ki / nM	K / nM	IC50 / nM	Error / nM	log(Kd/M)	Reporting ligand	Target fibril	Target type	Target source	Sample prep	Notes	Assay type	Assay conditions	InChI	InChIiso	MW	MolLogP	MR	Hacc	Hdon	tPSA	rings	rotBonds	aromaticRings	aliphaticRings	fracCsp3	heavyAtom	aliCarb	aliHet	aroCarb	aroHet	nHet	nSatCar	nSatHet	nSatRing	maxAbsPartial	maxPartial	minAbsPartial	minPartial	nCarbon	nPolar	nAtoms	carbonRatio	polarRatio	spC
FDDNP	C/C(C1=CC(C=C2)=C(C=C1)C=C2N(C)CCF)=C(C#N)/C#N	10.1523/jneurosci.21-24-j0004.2001		0.12		0.12		0.02	-9.920818754		Ab40	f	Biosource International Inc. (Camarillo, CA, USA)	Briefly, 0.5 mg of B(1–40) was dissolved in 1 ml of PBS (Sigma, St. Louis, MO), pH 7.4, and mixed with a magnetic stir bar for 3 d at 37°C, resulting in a visibly cloudy solution. The production of AB fibrils was confirmed by imaging with a Jeol 100CX transmission electron microscope (Jeol, Peabody, MA). Additional tests for fibril formation using Congo Red and Thioflavine T were also performed. …	site 1	Fluorescence Saturation	Fresh solutions of 5 mM FDDNP and FENE in ethanol were appropriately diluted with PBS, pH 7.4, to obtain a final concentration range of 0.05–90 nM probe in 4 ml of PBS, pH 7.4 (0.25% ethanol), with 40 ug of AB(1–40) fibrils. Fibrils were vortexed with either probe for 30 sec followed by a 15 min incubation before measuring the fluorescence in Spectrocell Far UV quartz cells (Spectro- cell, Orelan…	InChI=1S/C18H16FN3/c1-13(17(11-20)12-21)14-3-4-16-10-18(22(2)8-7-19)6-5-15(16)9-14/h3-6,9-10H,7-8H2,1-2H3	InChI=1S/C18H16FN3/c1-13(17(11-20)12-21)14-3-4-16-10-18(22(2)8-7-19)6-5-15(16)9-14/h3-6,9-10H,7-8H2,1-2H3	293.345	4.06616	87.013	3	0	50.82	2	4	2	0	0.222222222	22	0	0	2	0	4	0	0	0	0.37195775	0.132672858	0.132672858	-0.37195775	18	3	22	0.818181818	0.136363636	2
FDDNP	C/C(C1=CC(C=C2)=C(C=C1)C=C2N(C)CCF)=C(C#N)/C#N	10.1523/jneurosci.21-24-j0004.2001		1.86		1.86		0.22	-8.730487056		Ab40	f	Biosource International Inc. (Camarillo, CA, USA)	Briefly, 0.5 mg of B(1–40) was dissolved in 1 ml of PBS (Sigma, St. Louis, MO), pH 7.4, and mixed with a magnetic stir bar for 3 d at 37°C, resulting in a visibly cloudy solution. The production of AB fibrils was confirmed by imaging with a Jeol 100CX transmission electron microscope (Jeol, Peabody, MA). Additional tests for fibril formation using Congo Red and Thioflavine T were also performed. …	site 2	Fluorescence Saturation	Fresh solutions of 5 mM FDDNP and FENE in ethanol were appropriately diluted with PBS, pH 7.4, to obtain a final concentration range of 0.05–90 nM probe in 4 ml of PBS, pH 7.4 (0.25% ethanol), with 40 ug of AB(1–40) fibrils. Fibrils were vortexed with either probe for 30 sec followed by a 15 min incubation before measuring the fluorescence in Spectrocell Far UV quartz cells (Spectro- cell, Orelan…	InChI=1S/C18H16FN3/c1-13(17(11-20)12-21)14-3-4-16-10-18(22(2)8-7-19)6-5-15(16)9-14/h3-6,9-10H,7-8H2,1-2H3	InChI=1S/C18H16FN3/c1-13(17(11-20)12-21)14-3-4-16-10-18(22(2)8-7-19)6-5-15(16)9-14/h3-6,9-10H,7-8H2,1-2H3	293.345	4.06616	87.013	3	0	50.82	2	4	2	0	0.222222222	22	0	0	2	0	4	0	0	0	0.37195775	0.132672858	0.132672858	-0.37195775	18	3	22	0.818181818	0.136363636	2
FENE	CC(C1=CC(C=C2)=C(C=C1)C=C2N(C)CCF)=O	10.1523/jneurosci.21-24-j0004.2001		0.16		0.16		0.09	-9.795880017		Ab40	f	Biosource International Inc. (Camarillo, CA, USA)	Briefly, 0.5 mg of B(1–40) was dissolved in 1 ml of PBS (Sigma, St. Louis, MO), pH 7.4, and mixed with a magnetic stir bar for 3 d at 37°C, resulting in a visibly cloudy solution. The production of AB fibrils was confirmed by imaging with a Jeol 100CX transmission electron microscope (Jeol, Peabody, MA). Additional tests for fibril formation using Congo Red and Thioflavine T were also performed. …	site 1	Fluorescence Saturation	Fresh solutions of 5 mM FDDNP and FENE in ethanol were appropriately diluted with PBS, pH 7.4, to obtain a final concentration range of 0.05–90 nM probe in 4 ml of PBS, pH 7.4 (0.25% ethanol), with 40 ug of AB(1–40) fibrils. Fibrils were vortexed with either probe for 30 sec followed by a 15 min incubation before measuring the fluorescence in Spectrocell Far UV quartz cells (Spectro- cell, Orelan…	InChI=1S/C15H16FNO/c1-11(18)12-3-4-14-10-15(17(2)8-7-16)6-5-13(14)9-12/h3-6,9-10H,7-8H2,1-2H3	InChI=1S/C15H16FNO/c1-11(18)12-3-4-14-10-15(17(2)8-7-16)6-5-13(14)9-12/h3-6,9-10H,7-8H2,1-2H3	245.297	3.4481	73.1975	2	0	20.31	2	4	2	0	0.266666667	18	0	0	2	0	3	0	0	0	0.37195775	0.159320904	0.159320904	-0.37195775	15	2	18	0.833333333	0.111111111	0
FENE	CC(C1=CC(C=C2)=C(C=C1)C=C2N(C)CCF)=O	10.1523/jneurosci.21-24-j0004.2001		71.2		71.2		8.6	-7.147520006		Ab40	f	Biosource International Inc. (Camarillo, CA, USA)	Briefly, 0.5 mg of B(1–40) was dissolved in 1 ml of PBS (Sigma, St. Louis, MO), pH 7.4, and mixed with a magnetic stir bar for 3 d at 37°C, resulting in a visibly cloudy solution. The production of AB fibrils was confirmed by imaging with a Jeol 100CX transmission electron microscope (Jeol, Peabody, MA). Additional tests for fibril formation using Congo Red and Thioflavine T were also performed. …	site 2	Fluorescence Saturation	Fresh solutions of 5 mM FDDNP and FENE in ethanol were appropriately diluted with PBS, pH 7.4, to obtain a final concentration range of 0.05–90 nM probe in 4 ml of PBS, pH 7.4 (0.25% ethanol), with 40 ug of AB(1–40) fibrils. Fibrils were vortexed with either probe for 30 sec followed by a 15 min incubation before measuring the fluorescence in Spectrocell Far UV quartz cells (Spectro- cell, Orelan…	InChI=1S/C15H16FNO/c1-11(18)12-3-4-14-10-15(17(2)8-7-16)6-5-13(14)9-12/h3-6,9-10H,7-8H2,1-2H3	InChI=1S/C15H16FNO/c1-11(18)12-3-4-14-10-15(17(2)8-7-16)6-5-13(14)9-12/h3-6,9-10H,7-8H2,1-2H3	245.297	3.4481	73.1975	2	0	20.31	2	4	2	0	0.266666667	18	0	0	2	0	3	0	0	0	0.37195775	0.159320904	0.159320904	-0.37195775	15	2	18	0.833333333	0.111111111	0
FDDNP	CN(CCF)C1=CC(C=CC(/C(C)=C(C#N)/C#N)=C2)=C2C=C1	10.1016/j.mibio.2003.09.010			0.2	0.2			-9.698970004	[18F]FDDNP	Ab40	f	Biosource International Inc. (Camarillo, CA, USA)	Briefly, 0.5 mg of Ab(1–40) was dissolved in 1 ml phosphate-buffered saline (PBS), pH 7.4, and mixed with a magnetic stir bar for 3 days at 37 °C resulting in a visibly cloudy solution. Fibrils were used immediately after their production was confirmed. The production of Ab fibrils was confirmed by imaging with a Jeol 100CX transmission electron microscope (Jeol, Peabody, MA, USA). A 5-uL drop fr…		Radioligand Displacement	Solutions of nonradioactive ligand were prepared fresh for each radioactive competition assay. APFF glass fiber filters (0.7-um particle retention; Millipore, Bedford, MA, USA) were used in a 1225 sampling manifold (Millipore) that was modified with stainless steel support screens (Millipore) and glass sample chambers. Vacuum filtration involved 0.865 ug/ml of in vitro fibrils of synthetic Ab(1–4…	InChI=1S/C18H16FN3/c1-13(17(11-20)12-21)14-3-4-16-10-18(22(2)8-7-19)6-5-15(16)9-14/h3-6,9-10H,7-8H2,1-2H3	InChI=1S/C18H16FN3/c1-13(17(11-20)12-21)14-3-4-16-10-18(22(2)8-7-19)6-5-15(16)9-14/h3-6,9-10H,7-8H2,1-2H3	293.345	4.06616	87.013	3	0	50.82	2	4	2	0	0.222222222	22	0	0	2	0	4	0	0	0	0.37195775	0.132672858	0.132672858	-0.37195775	18	3	22	0.818181818	0.136363636	2
FDDNP	CN(CCF)C1=CC(C=CC(/C(C)=C(C#N)/C#N)=C2)=C2C=C1	10.1016/j.mibio.2003.09.010			234	234			-6.630784143	[18F]FDDNP	Ab40	f	Biosource International Inc. (Camarillo, CA, USA)	Briefly, 0.5 mg of Ab(1–40) was dissolved in 1 ml phosphate-buffered saline (PBS), pH 7.4, and mixed with a magnetic stir bar for 3 days at 37 °C resulting in a visibly cloudy solution. Fibrils were used immediately after their production was confirmed. The production of Ab fibrils was confirmed by imaging with a Jeol 100CX transmission electron microscope (Jeol, Peabody, MA, USA). A 5-uL drop fr…		Radioligand Displacement	Solutions of nonradioactive ligand were prepared fresh for each radioactive competition assay. APFF glass fiber filters (0.7-um particle retention; Millipore, Bedford, MA, USA) were used in a 1225 sampling manifold (Millipore) that was modified with stainless steel support screens (Millipore) and glass sample chambers. Vacuum filtration involved 0.865 ug/ml of in vitro fibrils of synthetic Ab(1–4…	InChI=1S/C18H16FN3/c1-13(17(11-20)12-21)14-3-4-16-10-18(22(2)8-7-19)6-5-15(16)9-14/h3-6,9-10H,7-8H2,1-2H3	InChI=1S/C18H16FN3/c1-13(17(11-20)12-21)14-3-4-16-10-18(22(2)8-7-19)6-5-15(16)9-14/h3-6,9-10H,7-8H2,1-2H3	293.345	4.06616	87.013	3	0	50.82	2	4	2	0	0.222222222	22	0	0	2	0	4	0	0	0	0.37195775	0.132672858	0.132672858	-0.37195775	18	3	22	0.818181818	0.136363636	2
tert-butyl DDNP	CN(CCF)C1=CC(C=CC(/C(C(C)(C)C)=C(C#N)/C#N)=C2)=C2C=C1	10.1016/j.mibio.2003.09.010			0.91	0.91			-9.040958608	[18F]FDDNP	Ab40	f	Biosource International Inc. (Camarillo, CA, USA)	Briefly, 0.5 mg of Ab(1–40) was dissolved in 1 ml phosphate-buffered saline (PBS), pH 7.4, and mixed with a magnetic stir bar for 3 days at 37 °C resulting in a visibly cloudy solution. Fibrils were used immediately after their production was confirmed. The production of Ab fibrils was confirmed by imaging with a Jeol 100CX transmission electron microscope (Jeol, Peabody, MA, USA). A 5-uL drop fr…		Radioligand Displacement	Solutions of nonradioactive ligand were prepared fresh for each radioactive competition assay. APFF glass fiber filters (0.7-um particle retention; Millipore, Bedford, MA, USA) were used in a 1225 sampling manifold (Millipore) that was modified with stainless steel support screens (Millipore) and glass sample chambers. Vacuum filtration involved 0.865 ug/ml of in vitro fibrils of synthetic Ab(1–4…	InChI=1S/C21H22FN3/c1-21(2,3)20(18(13-23)14-24)17-6-5-16-12-19(25(4)10-9-22)8-7-15(16)11-17/h5-8,11-12H,9-10H2,1-4H3	InChI=1S/C21H22FN3/c1-21(2,3)20(18(13-23)14-24)17-6-5-16-12-19(25(4)10-9-22)8-7-15(16)11-17/h5-8,11-12H,9-10H2,1-4H3	335.426	5.09236	100.794	3	0	50.82	2	4	2	0	0.333333333	25	0	0	2	0	4	0	0	0	0.37195775	0.133488884	0.133488884	-0.37195775	21	3	25	0.84	0.12	2
tert-butyl DDNP	CN(CCF)C1=CC(C=CC(/C(C(C)(C)C)=C(C#N)/C#N)=C2)=C2C=C1	10.1016/j.mibio.2003.09.010			521	521			-6.283162277	[18F]FDDNP	Ab40	f	Biosource International Inc. (Camarillo, CA, USA)	Briefly, 0.5 mg of Ab(1–40) was dissolved in 1 ml phosphate-buffered saline (PBS), pH 7.4, and mixed with a magnetic stir bar for 3 days at 37 °C resulting in a visibly cloudy solution. Fibrils were used immediately after their production was confirmed. The production of Ab fibrils was confirmed by imaging with a Jeol 100CX transmission electron microscope (Jeol, Peabody, MA, USA). A 5-uL drop fr…		Radioligand Displacement	Solutions of nonradioactive ligand were prepared fresh for each radioactive competition assay. APFF glass fiber filters (0.7-um particle retention; Millipore, Bedford, MA, USA) were used in a 1225 sampling manifold (Millipore) that was modified with stainless steel support screens (Millipore) and glass sample chambers. Vacuum filtration involved 0.865 ug/ml of in vitro fibrils of synthetic Ab(1–4…	InChI=1S/C21H22FN3/c1-21(2,3)20(18(13-23)14-24)17-6-5-16-12-19(25(4)10-9-22)8-7-15(16)11-17/h5-8,11-12H,9-10H2,1-4H3	InChI=1S/C21H22FN3/c1-21(2,3)20(18(13-23)14-24)17-6-5-16-12-19(25(4)10-9-22)8-7-15(16)11-17/h5-8,11-12H,9-10H2,1-4H3	335.426	5.09236	100.794	3	0	50.82	2	4	2	0	0.333333333	25	0	0	2	0	4	0	0	0	0.37195775	0.133488884	0.133488884	-0.37195775	21	3	25	0.84	0.12	2
cDDNP	CN(C)C1=CC(C=CC2=C3CCC/C2=C(C#N)\C#N)=C3C=C1	10.1016/j.mibio.2003.09.010			0.0066	0.0066			-11.18045606	[18F]FDDNP	Ab40	f	Biosource International Inc. (Camarillo, CA, USA)	Briefly, 0.5 mg of Ab(1–40) was dissolved in 1 ml phosphate-buffered saline (PBS), pH 7.4, and mixed with a magnetic stir bar for 3 days at 37 °C resulting in a visibly cloudy solution. Fibrils were used immediately after their production was confirmed. The production of Ab fibrils was confirmed by imaging with a Jeol 100CX transmission electron microscope (Jeol, Peabody, MA, USA). A 5-uL drop fr…		Radioligand Displacement	Solutions of nonradioactive ligand were prepared fresh for each radioactive competition assay. APFF glass fiber filters (0.7-um particle retention; Millipore, Bedford, MA, USA) were used in a 1225 sampling manifold (Millipore) that was modified with stainless steel support screens (Millipore) and glass sample chambers. Vacuum filtration involved 0.865 ug/ml of in vitro fibrils of synthetic Ab(1–4…	InChI=1S/C19H17N3/c1-22(2)15-7-9-17-13(10-15)6-8-19-16(14(11-20)12-21)4-3-5-18(17)19/h6-10H,3-5H2,1-2H3	InChI=1S/C19H17N3/c1-22(2)15-7-9-17-13(10-15)6-8-19-16(14(11-20)12-21)4-3-5-18(17)19/h6-10H,3-5H2,1-2H3	287.366	4.04286	89.359	3	0	50.82	3	1	2	1	0.263157895	22	1	0	2	0	3	0	0	0	0.377643537	0.132964598	0.132964598	-0.377643537	19	3	22	0.863636364	0.136363636	2
(R)-naproxen	COC1=CC2=C(C=C1)C=C([C@@H](C(O)=O)C)C=C2	10.1016/j.mibio.2003.09.010			2.76	2.76			-8.559090918	[18F]FDDNP	Ab40	f	Biosource International Inc. (Camarillo, CA, USA)	Briefly, 0.5 mg of Ab(1–40) was dissolved in 1 ml phosphate-buffered saline (PBS), pH 7.4, and mixed with a magnetic stir bar for 3 days at 37 °C resulting in a visibly cloudy solution. Fibrils were used immediately after their production was confirmed. The production of Ab fibrils was confirmed by imaging with a Jeol 100CX transmission electron microscope (Jeol, Peabody, MA, USA). A 5-uL drop fr…		Radioligand Displacement	Solutions of nonradioactive ligand were prepared fresh for each radioactive competition assay. APFF glass fiber filters (0.7-um particle retention; Millipore, Bedford, MA, USA) were used in a 1225 sampling manifold (Millipore) that was modified with stainless steel support screens (Millipore) and glass sample chambers. Vacuum filtration involved 0.865 ug/ml of in vitro fibrils of synthetic Ab(1–4…	InChI=1S/C14H14O3/c1-9(14(15)16)10-3-4-12-8-13(17-2)6-5-11(12)7-10/h3-9H,1-2H3,(H,15,16)/t9-/m0/s1	InChI=1S/C14H14O3/c1-9(14(15)16)10-3-4-12-8-13(17-2)6-5-11(12)7-10/h3-9H,1-2H3,(H,15,16)/t9-/m0/s1	230.263	3.0365	66.5508	2	1	46.53	2	3	2	0	0.214285714	17	0	0	2	0	3	0	0	0	0.496745104	0.310185725	0.310185725	-0.496745104	14	3	17	0.823529412	0.176470588	0
(S)-naproxen	COC1=CC(C=CC([C@@H](C)C(O)=O)=C2)=C2C=C1	10.1016/j.mibio.2003.09.010			5.7	5.7			-8.244125144	[18F]FDDNP	Ab40	f	Biosource International Inc. (Camarillo, CA, USA)	Briefly, 0.5 mg of Ab(1–40) was dissolved in 1 ml phosphate-buffered saline (PBS), pH 7.4, and mixed with a magnetic stir bar for 3 days at 37 °C resulting in a visibly cloudy solution. Fibrils were used immediately after their production was confirmed. The production of Ab fibrils was confirmed by imaging with a Jeol 100CX transmission electron microscope (Jeol, Peabody, MA, USA). A 5-uL drop fr…		Radioligand Displacement	Solutions of nonradioactive ligand were prepared fresh for each radioactive competition assay. APFF glass fiber filters (0.7-um particle retention; Millipore, Bedford, MA, USA) were used in a 1225 sampling manifold (Millipore) that was modified with stainless steel support screens (Millipore) and glass sample chambers. Vacuum filtration involved 0.865 ug/ml of in vitro fibrils of synthetic Ab(1–4…	InChI=1S/C14H14O3/c1-9(14(15)16)10-3-4-12-8-13(17-2)6-5-11(12)7-10/h3-9H,1-2H3,(H,15,16)/t9-/m1/s1	InChI=1S/C14H14O3/c1-9(14(15)16)10-3-4-12-8-13(17-2)6-5-11(12)7-10/h3-9H,1-2H3,(H,15,16)/t9-/m1/s1	230.263	3.0365	66.5508	2	1	46.53	2	3	2	0	0.214285714	17	0	0	2	0	3	0	0	0	0.496745104	0.310185725	0.310185725	-0.496745104	14	3	17	0.823529412	0.176470588	0
(R)-ibuprofen	CC(C)CC1=CC=C([C@@H](C)C(O)=O)C=C1	10.1016/j.mibio.2003.09.010			44400	44400		17400	-4.35261703	[18F]FDDNP	Ab40	f	Biosource International Inc. (Camarillo, CA, USA)	Briefly, 0.5 mg of Ab(1–40) was dissolved in 1 ml phosphate-buffered saline (PBS), pH 7.4, and mixed with a magnetic stir bar for 3 days at 37 °C resulting in a visibly cloudy solution. Fibrils were used immediately after their production was confirmed. The production of Ab fibrils was confirmed by imaging with a Jeol 100CX transmission electron microscope (Jeol, Peabody, MA, USA). A 5-uL drop fr…		Radioligand Displacement	Solutions of nonradioactive ligand were prepared fresh for each radioactive competition assay. APFF glass fiber filters (0.7-um particle retention; Millipore, Bedford, MA, USA) were used in a 1225 sampling manifold (Millipore) that was modified with stainless steel support screens (Millipore) and glass sample chambers. Vacuum filtration involved 0.865 ug/ml of in vitro fibrils of synthetic Ab(1–4…	InChI=1S/C13H18O2/c1-9(2)8-11-4-6-12(7-5-11)10(3)13(14)15/h4-7,9-10H,8H2,1-3H3,(H,14,15)/t10-/m1/s1	InChI=1S/C13H18O2/c1-9(2)8-11-4-6-12(7-5-11)10(3)13(14)15/h4-7,9-10H,8H2,1-3H3,(H,14,15)/t10-/m1/s1	206.285	3.0732	61.0348	1	1	37.3	1	4	1	0	0.461538462	15	0	0	1	0	2	0	0	0	0.480788502	0.310185352	0.310185352	-0.480788502	13	2	15	0.866666667	0.133333333	0
(S)-ibuprogen	CC(C)CC1=CC=C([C@H](C)C(O)=O)C=C1	10.1016/j.mibio.2003.09.010			11300	11300		5200	-4.946921557	[18F]FDDNP	Ab40	f	Biosource International Inc. (Camarillo, CA, USA)	Briefly, 0.5 mg of Ab(1–40) was dissolved in 1 ml phosphate-buffered saline (PBS), pH 7.4, and mixed with a magnetic stir bar for 3 days at 37 °C resulting in a visibly cloudy solution. Fibrils were used immediately after their production was confirmed. The production of Ab fibrils was confirmed by imaging with a Jeol 100CX transmission electron microscope (Jeol, Peabody, MA, USA). A 5-uL drop fr…		Radioligand Displacement	Solutions of nonradioactive ligand were prepared fresh for each radioactive competition assay. APFF glass fiber filters (0.7-um particle retention; Millipore, Bedford, MA, USA) were used in a 1225 sampling manifold (Millipore) that was modified with stainless steel support screens (Millipore) and glass sample chambers. Vacuum filtration involved 0.865 ug/ml of in vitro fibrils of synthetic Ab(1–4…	InChI=1S/C13H18O2/c1-9(2)8-11-4-6-12(7-5-11)10(3)13(14)15/h4-7,9-10H,8H2,1-3H3,(H,14,15)/t10-/m0/s1	InChI=1S/C13H18O2/c1-9(2)8-11-4-6-12(7-5-11)10(3)13(14)15/h4-7,9-10H,8H2,1-3H3,(H,14,15)/t10-/m0/s1	206.285	3.0732	61.0348	1	1	37.3	1	4	1	0	0.461538462	15	0	0	1	0	2	0	0	0	0.480788502	0.310185352	0.310185352	-0.480788502	13	2	15	0.866666667	0.133333333	0
diclofenac	O=C(O)CC1=CC=CC=C1NC2=C(Cl)C=CC=C2Cl	10.1016/j.mibio.2003.09.010			n	n				[18F]FDDNP	Ab40	f	Biosource International Inc. (Camarillo, CA, USA)	Briefly, 0.5 mg of Ab(1–40) was dissolved in 1 ml phosphate-buffered saline (PBS), pH 7.4, and mixed with a magnetic stir bar for 3 days at 37 °C resulting in a visibly cloudy solution. Fibrils were used immediately after their production was confirmed. The production of Ab fibrils was confirmed by imaging with a Jeol 100CX transmission electron microscope (Jeol, Peabody, MA, USA). A 5-uL drop fr…		Radioligand Displacement	Solutions of nonradioactive ligand were prepared fresh for each radioactive competition assay. APFF glass fiber filters (0.7-um particle retention; Millipore, Bedford, MA, USA) were used in a 1225 sampling manifold (Millipore) that was modified with stainless steel support screens (Millipore) and glass sample chambers. Vacuum filtration involved 0.865 ug/ml of in vitro fibrils of synthetic Ab(1–4…	InChI=1S/C14H11Cl2NO2/c15-10-5-3-6-11(16)14(10)17-12-7-2-1-4-9(12)8-13(18)19/h1-7,17H,8H2,(H,18,19)	InChI=1S/C14H11Cl2NO2/c15-10-5-3-6-11(16)14(10)17-12-7-2-1-4-9(12)8-13(18)19/h1-7,17H,8H2,(H,18,19)	296.153	4.3641	77.5265	2	2	49.33	2	4	2	0	0.071428571	19	0	0	2	0	5	0	0	0	0.480985214	0.307395877	0.307395877	-0.480985214	14	3	19	0.736842105	0.157894737	0
CR	CC1=CC(C2=CC=C(/N=N/C3=CC(S(=O)([O-])=O)=C(C=CC=C4)C4=C3N)C(C)=C2)=CC=C1/N=N/C5=CC(S(=O)([O-])=O)=C(C=CC=C6)C6=C5N	10.1016/j.mibio.2003.09.010			n	n				[18F]FDDNP	Ab40	f	Biosource International Inc. (Camarillo, CA, USA)	Briefly, 0.5 mg of Ab(1–40) was dissolved in 1 ml phosphate-buffered saline (PBS), pH 7.4, and mixed with a magnetic stir bar for 3 days at 37 °C resulting in a visibly cloudy solution. Fibrils were used immediately after their production was confirmed. The production of Ab fibrils was confirmed by imaging with a Jeol 100CX transmission electron microscope (Jeol, Peabody, MA, USA). A 5-uL drop fr…		Radioligand Displacement	Solutions of nonradioactive ligand were prepared fresh for each radioactive competition assay. APFF glass fiber filters (0.7-um particle retention; Millipore, Bedford, MA, USA) were used in a 1225 sampling manifold (Millipore) that was modified with stainless steel support screens (Millipore) and glass sample chambers. Vacuum filtration involved 0.865 ug/ml of in vitro fibrils of synthetic Ab(1–4…	InChI=1S/C34H28N6O6S2/c1-19-15-21(11-13-27(19)37-39-29-17-31(47(41,42)43)23-7-3-5-9-25(23)33(29)35)22-12-14-28(20(2)16-22)38-40-30-18-32(48(44,45)46)24-8-4-6-10-26(24)34(30)36/h3-18H,35-36H2,1-2H3,(H,41,42,43)(H,44,45,46)/p-2/b39-37+,40-38+	InChI=1S/C34H28N6O6S2/c1-19-15-21(11-13-27(19)37-39-29-17-31(47(41,42)43)23-7-3-5-9-25(23)33(29)35)22-12-14-28(20(2)16-22)38-40-30-18-32(48(44,45)46)24-8-4-6-10-26(24)34(30)36/h3-18H,35-36H2,1-2H3,(H,41,42,43)(H,44,45,46)/p-2/b39-37+,40-38+	678.752	8.08024	182.3512	12	2	215.88	6	7	6	0	0.058823529	48	0	0	6	0	14	0	0	0	0.744018484	0.124628529	0.124628529	-0.744018484	34	14	48	0.708333333	0.291666667	0
ThT	OC1=CC=C([N+](C)=C(C2=CC=C(N(C)C)C=C2)S3)C3=C1	10.1016/j.mibio.2003.09.010			n	n				[18F]FDDNP	Ab40	f	Biosource International Inc. (Camarillo, CA, USA)	Briefly, 0.5 mg of Ab(1–40) was dissolved in 1 ml phosphate-buffered saline (PBS), pH 7.4, and mixed with a magnetic stir bar for 3 days at 37 °C resulting in a visibly cloudy solution. Fibrils were used immediately after their production was confirmed. The production of Ab fibrils was confirmed by imaging with a Jeol 100CX transmission electron microscope (Jeol, Peabody, MA, USA). A 5-uL drop fr…		Radioligand Displacement	Solutions of nonradioactive ligand were prepared fresh for each radioactive competition assay. APFF glass fiber filters (0.7-um particle retention; Millipore, Bedford, MA, USA) were used in a 1225 sampling manifold (Millipore) that was modified with stainless steel support screens (Millipore) and glass sample chambers. Vacuum filtration involved 0.865 ug/ml of in vitro fibrils of synthetic Ab(1–4…	InChI=1S/C16H16N2OS/c1-17(2)12-6-4-11(5-7-12)16-18(3)14-9-8-13(19)10-15(14)20-16/h4-10H,1-3H3/p+1	InChI=1S/C16H16N2OS/c1-17(2)12-6-4-11(5-7-12)16-18(3)14-9-8-13(19)10-15(14)20-16/h4-10H,1-3H3/p+1	285.392	3.1644	84.4288	3	1	27.35	3	2	3	0	0.1875	20	0	0	2	1	4	0	0	0	0.507904719	0.269359896	0.269359896	-0.507904719	16	4	20	0.8	0.2	0
IDPBF-2	IC1=CC=C2C(C(/C(O2)=C/C=C/C3=CC=C(N(C)C)C=C3)=O)=C1	10.1016/j.bmcl.2022.128679			4.1	4.1		1.7	-8.387216143	ThT	aS	f	Recombinant (E. Coli)	Purified recombinant α-syn proteins (5 mg/ml) containing 30 mm Tris-HCl (pH 7.5), 10 mm DTT, and 0.1% sodium azide were incubated at 4 °C, room temperature (20∼25 °C), and 37 °C with or without shaking. Incubation with shaking was done with a horizontal shaker (TAITEC) at 200 rpm. After incubation for 7 days, the samples were diluted to 2 mg/ml in saline.		Fluorescence Displacement	a-Syn or Ab(1-42) aggregates (final conc., 0.23 uM) were incubated in Tris-buffered saline (TBS) at room temperature for 30 min in the presence of ThT (final conc., 2.7 uM) with or without PBF derivatives (final conc., 0.12 nM-9.1 μM), and then the mixture was dispensed into Multi Wellplate (0.4 mL × 96 Flatbottomed wells, Sumitomo Bakelite Co., Ltd., Tokyo, Japan) and subjected to fluorescence s…	InChI=1S/C19H16INO2/c1-21(2)15-9-6-13(7-10-15)4-3-5-18-19(22)16-12-14(20)8-11-17(16)23-18/h3-12H,1-2H3/b4-3+,18-5-	InChI=1S/C19H16INO2/c1-21(2)15-9-6-13(7-10-15)4-3-5-18-19(22)16-12-14(20)8-11-17(16)23-18/h3-12H,1-2H3/b4-3+,18-5-	417.246	4.5296	102.0035	3	0	29.54	3	3	2	1	0.105263158	23	0	1	2	0	4	0	0	0	0.452450052	0.231479618	0.231479618	-0.452450052	19	3	23	0.826086957	0.130434783	0
IDPBF-2	IC1=CC=C2C(C(/C(O2)=C/C=C/C3=CC=C(N(C)C)C=C3)=O)=C1	10.1016/j.bmcl.2022.128679			1.3	1.3		0.032	-8.886056648	ThT	Ab	f	Osaka Peptide Institute (Osaka, Japan)	Ab(1-42) aggregates were prepared by incubating the Ab(1-42) peptides (0.25 mg/mL in phosphate-buffered saline (PBS), pH 7.4) at 37°C for 42 h with gentle and constant shaking. The formation of Ab(1-42) aggregates was confirmed with measurement of the fluorescence intensity of Thioflavin T (ThT).		Fluorescence Displacement	a-Syn or Ab(1-42) aggregates (final conc., 0.23 uM) were incubated in Tris-buffered saline (TBS) at room temperature for 30 min in the presence of ThT (final conc., 2.7 uM) with or without PBF derivatives (final conc., 0.12 nM-9.1 μM), and then the mixture was dispensed into Multi Wellplate (0.4 mL × 96 Flatbottomed wells, Sumitomo Bakelite Co., Ltd., Tokyo, Japan) and subjected to fluorescence s…	InChI=1S/C19H16INO2/c1-21(2)15-9-6-13(7-10-15)4-3-5-18-19(22)16-12-14(20)8-11-17(16)23-18/h3-12H,1-2H3/b4-3+,18-5-	InChI=1S/C19H16INO2/c1-21(2)15-9-6-13(7-10-15)4-3-5-18-19(22)16-12-14(20)8-11-17(16)23-18/h3-12H,1-2H3/b4-3+,18-5-	417.246	4.5296	102.0035	3	0	29.54	3	3	2	1	0.105263158	23	0	1	2	0	4	0	0	0	0.452450052	0.231479618	0.231479618	-0.452450052	19	3	23	0.826086957	0.130434783	0
INPBF-2	IC1=CC=C2C(C(/C(O2)=C/C=C/C3=CC=C([N+]([O-])=O)C=C3)=O)=C1	10.1016/j.bmcl.2022.128679			3.4	3.4		0.38	-8.468521083	ThT	aS	f	Recombinant (E. Coli)	Purified recombinant α-syn proteins (5 mg/ml) containing 30 mm Tris-HCl (pH 7.5), 10 mm DTT, and 0.1% sodium azide were incubated at 4 °C, room temperature (20∼25 °C), and 37 °C with or without shaking. Incubation with shaking was done with a horizontal shaker (TAITEC) at 200 rpm. After incubation for 7 days, the samples were diluted to 2 mg/ml in saline.		Fluorescence Displacement	a-Syn or Ab(1-42) aggregates (final conc., 0.23 uM) were incubated in Tris-buffered saline (TBS) at room temperature for 30 min in the presence of ThT (final conc., 2.7 uM) with or without PBF derivatives (final conc., 0.12 nM-9.1 μM), and then the mixture was dispensed into Multi Wellplate (0.4 mL × 96 Flatbottomed wells, Sumitomo Bakelite Co., Ltd., Tokyo, Japan) and subjected to fluorescence s…	InChI=1S/C17H10INO4/c18-12-6-9-15-14(10-12)17(20)16(23-15)3-1-2-11-4-7-13(8-5-11)19(21)22/h1-10H/b2-1+,16-3-	InChI=1S/C17H10INO4/c18-12-6-9-15-14(10-12)17(20)16(23-15)3-1-2-11-4-7-13(8-5-11)19(21)22/h1-10H/b2-1+,16-3-	419.174	4.3718	94.3309	4	0	69.44	3	3	2	1	0	23	0	1	2	0	6	0	0	0	0.452450052	0.268964854	0.268964854	-0.452450052	17	5	23	0.739130435	0.217391304	0
INPBF-2	IC1=CC=C2C(C(/C(O2)=C/C=C/C3=CC=C([N+]([O-])=O)C=C3)=O)=C1	10.1016/j.bmcl.2022.128679			2	2		0.63	-8.698970004	ThT	Ab	f	Osaka Peptide Institute (Osaka, Japan)	Ab(1-42) aggregates were prepared by incubating the Ab(1-42) peptides (0.25 mg/mL in phosphate-buffered saline (PBS), pH 7.4) at 37°C for 42 h with gentle and constant shaking. The formation of Ab(1-42) aggregates was confirmed with measurement of the fluorescence intensity of Thioflavin T (ThT).		Fluorescence Displacement	a-Syn or Ab(1-42) aggregates (final conc., 0.23 uM) were incubated in Tris-buffered saline (TBS) at room temperature for 30 min in the presence of ThT (final conc., 2.7 uM) with or without PBF derivatives (final conc., 0.12 nM-9.1 μM), and then the mixture was dispensed into Multi Wellplate (0.4 mL × 96 Flatbottomed wells, Sumitomo Bakelite Co., Ltd., Tokyo, Japan) and subjected to fluorescence s…	InChI=1S/C17H10INO4/c18-12-6-9-15-14(10-12)17(20)16(23-15)3-1-2-11-4-7-13(8-5-11)19(21)22/h1-10H/b2-1+,16-3-	InChI=1S/C17H10INO4/c18-12-6-9-15-14(10-12)17(20)16(23-15)3-1-2-11-4-7-13(8-5-11)19(21)22/h1-10H/b2-1+,16-3-	419.174	4.3718	94.3309	4	0	69.44	3	3	2	1	0	23	0	1	2	0	6	0	0	0	0.452450052	0.268964854	0.268964854	-0.452450052	17	5	23	0.739130435	0.217391304	0
IDPBF-3	IC1=CC=C2C(C(/C(O2)=C/C=C/C=C/C3=CC=C(N(C)C)C=C3)=O)=C1	10.1016/j.bmcl.2022.128679			0.37	0.37		0.056	-9.431798276	ThT	aS	f	Recombinant (E. Coli)	Purified recombinant α-syn proteins (5 mg/ml) containing 30 mm Tris-HCl (pH 7.5), 10 mm DTT, and 0.1% sodium azide were incubated at 4 °C, room temperature (20∼25 °C), and 37 °C with or without shaking. Incubation with shaking was done with a horizontal shaker (TAITEC) at 200 rpm. After incubation for 7 days, the samples were diluted to 2 mg/ml in saline.		Fluorescence Displacement	a-Syn or Ab(1-42) aggregates (final conc., 0.23 uM) were incubated in Tris-buffered saline (TBS) at room temperature for 30 min in the presence of ThT (final conc., 2.7 uM) with or without PBF derivatives (final conc., 0.12 nM-9.1 μM), and then the mixture was dispensed into Multi Wellplate (0.4 mL × 96 Flatbottomed wells, Sumitomo Bakelite Co., Ltd., Tokyo, Japan) and subjected to fluorescence s…	InChI=1S/C21H18INO2/c1-23(2)17-11-8-15(9-12-17)6-4-3-5-7-20-21(24)18-14-16(22)10-13-19(18)25-20/h3-14H,1-2H3/b5-3+,6-4+,20-7-	InChI=1S/C21H18INO2/c1-23(2)17-11-8-15(9-12-17)6-4-3-5-7-20-21(24)18-14-16(22)10-13-19(18)25-20/h3-14H,1-2H3/b5-3+,6-4+,20-7-	443.284	5.0858	111.1435	3	0	29.54	3	4	2	1	0.095238095	25	0	1	2	0	4	0	0	0	0.452450055	0.231479615	0.231479615	-0.452450055	21	3	25	0.84	0.12	0
IDPBF-3	IC1=CC=C2C(C(/C(O2)=C/C=C/C=C/C3=CC=C(N(C)C)C=C3)=O)=C1	10.1016/j.bmcl.2022.128679			0.6	0.6		0.26	-9.22184875	ThT	Ab	f	Osaka Peptide Institute (Osaka, Japan)	Ab(1-42) aggregates were prepared by incubating the Ab(1-42) peptides (0.25 mg/mL in phosphate-buffered saline (PBS), pH 7.4) at 37°C for 42 h with gentle and constant shaking. The formation of Ab(1-42) aggregates was confirmed with measurement of the fluorescence intensity of Thioflavin T (ThT).		Fluorescence Displacement	a-Syn or Ab(1-42) aggregates (final conc., 0.23 uM) were incubated in Tris-buffered saline (TBS) at room temperature for 30 min in the presence of ThT (final conc., 2.7 uM) with or without PBF derivatives (final conc., 0.12 nM-9.1 μM), and then the mixture was dispensed into Multi Wellplate (0.4 mL × 96 Flatbottomed wells, Sumitomo Bakelite Co., Ltd., Tokyo, Japan) and subjected to fluorescence s…	InChI=1S/C21H18INO2/c1-23(2)17-11-8-15(9-12-17)6-4-3-5-7-20-21(24)18-14-16(22)10-13-19(18)25-20/h3-14H,1-2H3/b5-3+,6-4+,20-7-	InChI=1S/C21H18INO2/c1-23(2)17-11-8-15(9-12-17)6-4-3-5-7-20-21(24)18-14-16(22)10-13-19(18)25-20/h3-14H,1-2H3/b5-3+,6-4+,20-7-	443.284	5.0858	111.1435	3	0	29.54	3	4	2	1	0.095238095	25	0	1	2	0	4	0	0	0	0.452450055	0.231479615	0.231479615	-0.452450055	21	3	25	0.84	0.12	0
INPBF-3	IC1=CC=C2C(C(/C(O2)=C/C=C/C=C/C3=CC=C([N+]([O-])=O)C=C3)=O)=C1	10.1016/j.bmcl.2022.128679			0.28	0.28		0.17	-9.552841969	ThT	aS	f	Recombinant (E. Coli)	Purified recombinant α-syn proteins (5 mg/ml) containing 30 mm Tris-HCl (pH 7.5), 10 mm DTT, and 0.1% sodium azide were incubated at 4 °C, room temperature (20∼25 °C), and 37 °C with or without shaking. Incubation with shaking was done with a horizontal shaker (TAITEC) at 200 rpm. After incubation for 7 days, the samples were diluted to 2 mg/ml in saline.		Fluorescence Displacement	a-Syn or Ab(1-42) aggregates (final conc., 0.23 uM) were incubated in Tris-buffered saline (TBS) at room temperature for 30 min in the presence of ThT (final conc., 2.7 uM) with or without PBF derivatives (final conc., 0.12 nM-9.1 μM), and then the mixture was dispensed into Multi Wellplate (0.4 mL × 96 Flatbottomed wells, Sumitomo Bakelite Co., Ltd., Tokyo, Japan) and subjected to fluorescence s…	InChI=1S/C19H12INO4/c20-14-8-11-17-16(12-14)19(22)18(25-17)5-3-1-2-4-13-6-9-15(10-7-13)21(23)24/h1-12H/b3-1+,4-2+,18-5-	InChI=1S/C19H12INO4/c20-14-8-11-17-16(12-14)19(22)18(25-17)5-3-1-2-4-13-6-9-15(10-7-13)21(23)24/h1-12H/b3-1+,4-2+,18-5-	445.212	4.928	103.4709	4	0	69.44	3	4	2	1	0	25	0	1	2	0	6	0	0	0	0.452450055	0.268964854	0.268964854	-0.452450055	19	5	25	0.76	0.2	0
INPBF-3	IC1=CC=C2C(C(/C(O2)=C/C=C/C=C/C3=CC=C([N+]([O-])=O)C=C3)=O)=C1	10.1016/j.bmcl.2022.128679			1.2	1.2		0.55	-8.920818754	ThT	Ab	f	Osaka Peptide Institute (Osaka, Japan)	Ab(1-42) aggregates were prepared by incubating the Ab(1-42) peptides (0.25 mg/mL in phosphate-buffered saline (PBS), pH 7.4) at 37°C for 42 h with gentle and constant shaking. The formation of Ab(1-42) aggregates was confirmed with measurement of the fluorescence intensity of Thioflavin T (ThT).		Fluorescence Displacement	a-Syn or Ab(1-42) aggregates (final conc., 0.23 uM) were incubated in Tris-buffered saline (TBS) at room temperature for 30 min in the presence of ThT (final conc., 2.7 uM) with or without PBF derivatives (final conc., 0.12 nM-9.1 μM), and then the mixture was dispensed into Multi Wellplate (0.4 mL × 96 Flatbottomed wells, Sumitomo Bakelite Co., Ltd., Tokyo, Japan) and subjected to fluorescence s…	InChI=1S/C19H12INO4/c20-14-8-11-17-16(12-14)19(22)18(25-17)5-3-1-2-4-13-6-9-15(10-7-13)21(23)24/h1-12H/b3-1+,4-2+,18-5-	InChI=1S/C19H12INO4/c20-14-8-11-17-16(12-14)19(22)18(25-17)5-3-1-2-4-13-6-9-15(10-7-13)21(23)24/h1-12H/b3-1+,4-2+,18-5-	445.212	4.928	103.4709	4	0	69.44	3	4	2	1	0	25	0	1	2	0	6	0	0	0	0.452450055	0.268964854	0.268964854	-0.452450055	19	5	25	0.76	0.2	0
Alagille2011-3a	NC(C=C1)=CC=C1C2=CN(C3=CC=C(OC)C=C3S4)C4=N2	10.1016/j.bmcl.2011.03.052			29.8	29.8		2.1	-7.525783736	[3H]BTA-1	Ab40	f	Not specified	Not specified		Radioligand Displacement	Not specified	InChI=1S/C16H13N3OS/c1-20-12-6-7-14-15(8-12)21-16-18-13(9-19(14)16)10-2-4-11(17)5-3-10/h2-9H,17H2,1H3	InChI=1S/C16H13N3OS/c1-20-12-6-7-14-15(8-12)21-16-18-13(9-19(14)16)10-2-4-11(17)5-3-10/h2-9H,17H2,1H3	295.367	3.8068	86.9754	5	1	52.55	4	2	4	0	0.0625	21	0	0	2	2	5	0	0	0	0.49671251	0.194797995	0.194797995	-0.49671251	16	5	21	0.761904762	0.238095238	0
Alagille2011-3b	CNC(C=C1)=CC=C1C2=CN(C3=CC=C(OC)C=C3S4)C4=N2	10.1016/j.bmcl.2011.03.052			6.09	6.09		0.08	-8.215382707	[3H]BTA-1	Ab40	f	Not specified	Not specified		Radioligand Displacement	Not specified	InChI=1S/C17H15N3OS/c1-18-12-5-3-11(4-6-12)14-10-20-15-8-7-13(21-2)9-16(15)22-17(20)19-14/h3-10,18H,1-2H3	InChI=1S/C17H15N3OS/c1-18-12-5-3-11(4-6-12)14-10-20-15-8-7-13(21-2)9-16(15)22-17(20)19-14/h3-10,18H,1-2H3	309.394	4.2663	92.1097	5	1	38.56	4	3	4	0	0.117647059	22	0	0	2	2	5	0	0	0	0.49671251	0.194797995	0.194797995	-0.49671251	17	5	22	0.772727273	0.227272727	0
Alagille2011-3c	CN(C)C(C=C1)=CC=C1C2=CN(C3=CC=C(OC)C=C3S4)C4=N2	10.1016/j.bmcl.2011.03.052			58.6	58.6		4.7	-7.232102384	[3H]BTA-1	Ab40	f	Not specified	Not specified		Radioligand Displacement	Not specified	InChI=1S/C18H17N3OS/c1-20(2)13-6-4-12(5-7-13)15-11-21-16-9-8-14(22-3)10-17(16)23-18(21)19-15/h4-11H,1-3H3	InChI=1S/C18H17N3OS/c1-20(2)13-6-4-12(5-7-13)15-11-21-16-9-8-14(22-3)10-17(16)23-18(21)19-15/h4-11H,1-3H3	323.421	4.2906	96.89	5	0	29.77	4	3	4	0	0.166666667	23	0	0	2	2	5	0	0	0	0.49671251	0.194797995	0.194797995	-0.49671251	18	5	23	0.782608696	0.217391304	0
Alagille2011-3d	FC1=CC=C(C(S2)=C1)N3C2=NC(C4=CC=C(N)C=C4)=C3	10.1016/j.bmcl.2011.03.052			133	133		21	-6.876148359	[3H]BTA-1	Ab40	f	Not specified	Not specified		Radioligand Displacement	Not specified	InChI=1S/C15H10FN3S/c16-10-3-6-13-14(7-10)20-15-18-12(8-19(13)15)9-1-4-11(17)5-2-9/h1-8H,17H2	InChI=1S/C15H10FN3S/c16-10-3-6-13-14(7-10)20-15-18-12(8-19(13)15)9-1-4-11(17)5-2-9/h1-8H,17H2	283.331	3.9373	80.3814	4	1	43.32	4	1	4	0	0	20	0	0	2	2	5	0	0	0	0.398728245	0.194797467	0.194797467	-0.398728245	15	4	20	0.75	0.2	0
Alagille2011-3e	FC1=CC=C(C(S2)=C1)N3C2=NC(C4=CC=C(NC)C=C4)=C3	10.1016/j.bmcl.2011.03.052			38.1	38.1		2.6	-7.419075024	[3H]BTA-1	Ab40	f	Not specified	Not specified		Radioligand Displacement	Not specified	InChI=1S/C16H12FN3S/c1-18-12-5-2-10(3-6-12)13-9-20-14-7-4-11(17)8-15(14)21-16(20)19-13/h2-9,18H,1H3	InChI=1S/C16H12FN3S/c1-18-12-5-2-10(3-6-12)13-9-20-14-7-4-11(17)8-15(14)21-16(20)19-13/h2-9,18H,1H3	297.358	4.3968	85.5157	4	1	29.33	4	2	4	0	0.0625	21	0	0	2	2	5	0	0	0	0.388121484	0.194797467	0.194797467	-0.388121484	16	4	21	0.761904762	0.19047619	0
Alagille2011-3f	FC1=CC=C(C(S2)=C1)N3C2=NC(C4=CC=C(N(C)C)C=C4)=C3	10.1016/j.bmcl.2011.03.052			42.9	42.9		5.7	-7.367542708	[3H]BTA-1	Ab40	f	Not specified	Not specified		Radioligand Displacement	Not specified	InChI=1S/C17H14FN3S/c1-20(2)13-6-3-11(4-7-13)14-10-21-15-8-5-12(18)9-16(15)22-17(21)19-14/h3-10H,1-2H3	InChI=1S/C17H14FN3S/c1-20(2)13-6-3-11(4-7-13)14-10-21-15-8-5-12(18)9-16(15)22-17(21)19-14/h3-10H,1-2H3	311.385	4.4211	90.296	4	0	20.54	4	2	4	0	0.117647059	22	0	0	2	2	5	0	0	0	0.377660894	0.194797467	0.194797467	-0.377660894	17	4	22	0.772727273	0.181818182	0
Alagille2011-3g	BrC1=CC=C(C(S2)=C1)N3C2=NC(C4=CC=C(N)C=C4)=C3	10.1016/j.bmcl.2011.03.052			28.8	28.8		1.2	-7.540607512	[3H]BTA-1	Ab40	f	Not specified	Not specified		Radioligand Displacement	Not specified	InChI=1S/C15H10BrN3S/c16-10-3-6-13-14(7-10)20-15-18-12(8-19(13)15)9-1-4-11(17)5-2-9/h1-8H,17H2	InChI=1S/C15H10BrN3S/c16-10-3-6-13-14(7-10)20-15-18-12(8-19(13)15)9-1-4-11(17)5-2-9/h1-8H,17H2	344.237	4.5607	88.1234	4	1	43.32	4	1	4	0	0	20	0	0	2	2	5	0	0	0	0.398728245	0.19479645	0.19479645	-0.398728245	15	4	20	0.75	0.2	0
Alagille2011-3h	BrC1=CC=C(C(S2)=C1)N3C2=NC(C4=CC=C(NC)C=C4)=C3	10.1016/j.bmcl.2011.03.052			34.5	34.5		3.5	-7.462180905	[3H]BTA-1	Ab40	f	Not specified	Not specified		Radioligand Displacement	Not specified	InChI=1S/C16H12BrN3S/c1-18-12-5-2-10(3-6-12)13-9-20-14-7-4-11(17)8-15(14)21-16(20)19-13/h2-9,18H,1H3	InChI=1S/C16H12BrN3S/c1-18-12-5-2-10(3-6-12)13-9-20-14-7-4-11(17)8-15(14)21-16(20)19-13/h2-9,18H,1H3	358.264	5.0202	93.2577	4	1	29.33	4	2	4	0	0.0625	21	0	0	2	2	5	0	0	0	0.388121484	0.19479645	0.19479645	-0.388121484	16	4	21	0.761904762	0.19047619	0
Alagille2011-3i	BrC1=CC=C(C(S2)=C1)N3C2=NC(C4=CC=C(N(C)C)C=C4)=C3	10.1016/j.bmcl.2011.03.052			43.4	43.4		5.7	-7.36251027	[3H]BTA-1	Ab40	f	Not specified	Not specified		Radioligand Displacement	Not specified	InChI=1S/C17H14BrN3S/c1-20(2)13-6-3-11(4-7-13)14-10-21-15-8-5-12(18)9-16(15)22-17(21)19-14/h3-10H,1-2H3	InChI=1S/C17H14BrN3S/c1-20(2)13-6-3-11(4-7-13)14-10-21-15-8-5-12(18)9-16(15)22-17(21)19-14/h3-10H,1-2H3	372.291	5.0445	98.038	4	0	20.54	4	2	4	0	0.117647059	22	0	0	2	2	5	0	0	0	0.377660894	0.19479645	0.19479645	-0.377660894	17	4	22	0.772727273	0.181818182	0
Alagille2011-3j	IC(C=C1)=CC=C1C2=CN(C3=CC=C(OC)C=C3S4)C4=N2	10.1016/j.bmcl.2011.03.052			10.9	10.9		0.18	-7.962573502	[3H]BTA-1	Ab40	f	Not specified	Not specified		Radioligand Displacement	Not specified	InChI=1S/C16H11IN2OS/c1-20-12-6-7-14-15(8-12)21-16-18-13(9-19(14)16)10-2-4-11(17)5-3-10/h2-9H,1H3	InChI=1S/C16H11IN2OS/c1-20-12-6-7-14-15(8-12)21-16-18-13(9-19(14)16)10-2-4-11(17)5-3-10/h2-9H,1H3	406.248	4.8292	95.28	4	0	26.53	4	2	4	0	0.0625	21	0	0	2	2	5	0	0	0	0.49671251	0.194797995	0.194797995	-0.49671251	16	4	21	0.761904762	0.19047619	0
Alagille2011-3k	IC(C=C1)=CC=C1C2=CN(C3=CC=C(F)C=C3S4)C4=N2	10.1016/j.bmcl.2011.03.052			41.9	41.9		5.2	-7.377785977	[3H]BTA-1	Ab40	f	Not specified	Not specified		Radioligand Displacement	Not specified	InChI=1S/C15H8FIN2S/c16-10-3-6-13-14(7-10)20-15-18-12(8-19(13)15)9-1-4-11(17)5-2-9/h1-8H	InChI=1S/C15H8FIN2S/c16-10-3-6-13-14(7-10)20-15-18-12(8-19(13)15)9-1-4-11(17)5-2-9/h1-8H	394.212	4.9597	88.686	3	0	17.3	4	1	4	0	0	20	0	0	2	2	5	0	0	0	0.289619189	0.194797467	0.194797467	-0.289619189	15	3	20	0.75	0.15	0
Alagille2011-3l	IC(C=C1)=CC=C1C2=CN(C3=CC=C(Br)C=C3S4)C4=N2	10.1016/j.bmcl.2011.03.052			21.1	21.1		0.9	-7.675717545	[3H]BTA-1	Ab40	f	Not specified	Not specified		Radioligand Displacement	Not specified	InChI=1S/C15H8BrIN2S/c16-10-3-6-13-14(7-10)20-15-18-12(8-19(13)15)9-1-4-11(17)5-2-9/h1-8H	InChI=1S/C15H8BrIN2S/c16-10-3-6-13-14(7-10)20-15-18-12(8-19(13)15)9-1-4-11(17)5-2-9/h1-8H	455.118	5.5831	96.428	3	0	17.3	4	1	4	0	0	20	0	0	2	2	5	0	0	0	0.289621413	0.19479645	0.19479645	-0.289621413	15	3	20	0.75	0.15	0
Alagille2011-3m	CC1=CC=C(C(S2)=C1)N3C2=NC(C4=CC=C(I)C=C4)=C3	10.1016/j.bmcl.2011.03.052			17.7	17.7		1.9	-7.752026734	[3H]BTA-1	Ab40	f	Not specified	Not specified		Radioligand Displacement	Not specified	InChI=1S/C16H11IN2S/c1-10-2-7-14-15(8-10)20-16-18-13(9-19(14)16)11-3-5-12(17)6-4-11/h2-9H,1H3	InChI=1S/C16H11IN2S/c1-10-2-7-14-15(8-10)20-16-18-13(9-19(14)16)11-3-5-12(17)6-4-11/h2-9H,1H3	390.249	5.12902	93.465	3	0	17.3	4	1	4	0	0.0625	20	0	0	2	2	4	0	0	0	0.289622428	0.194795986	0.194795986	-0.289622428	16	3	20	0.8	0.15	0
Alagille2011-3n	COC1=CC=C(C(S2)=C1)N3C2=NC(C4=CC=C(Br)C=C4)=C3	10.1016/j.bmcl.2011.03.052			9.4	9.4		0.07	-8.026872146	[3H]BTA-1	Ab40	f	Not specified	Not specified		Radioligand Displacement	Not specified	InChI=1S/C16H11BrN2OS/c1-20-12-6-7-14-15(8-12)21-16-18-13(9-19(14)16)10-2-4-11(17)5-3-10/h2-9H,1H3	InChI=1S/C16H11BrN2OS/c1-20-12-6-7-14-15(8-12)21-16-18-13(9-19(14)16)10-2-4-11(17)5-3-10/h2-9H,1H3	359.248	4.9871	90.263	4	0	26.53	4	2	4	0	0.0625	21	0	0	2	2	5	0	0	0	0.49671251	0.194797995	0.194797995	-0.49671251	16	4	21	0.761904762	0.19047619	0
Alagille2011-3o	CC1=CC=C(C(S2)=C1)N3C2=NC(C4=CC=C(Br)C=C4)=C3	10.1016/j.bmcl.2011.03.052			26	26		0	-7.585026652	[3H]BTA-1	Ab40	f	Not specified	Not specified		Radioligand Displacement	Not specified	InChI=1S/C16H11BrN2S/c1-10-2-7-14-15(8-10)20-16-18-13(9-19(14)16)11-3-5-12(17)6-4-11/h2-9H,1H3	InChI=1S/C16H11BrN2S/c1-10-2-7-14-15(8-10)20-16-18-13(9-19(14)16)11-3-5-12(17)6-4-11/h2-9H,1H3	343.249	5.28692	88.448	3	0	17.3	4	1	4	0	0.0625	20	0	0	2	2	4	0	0	0	0.289622428	0.194795986	0.194795986	-0.289622428	16	3	20	0.8	0.15	0
IMPY	IC1=CN2C(C=C1)=NC(C3=CC=C(N(C)C)C=C3)=C2	10.1016/j.bmcl.2011.03.052			9	9		0.9	-8.045757491	[3H]BTA-1	Ab40	f	Not specified	Not specified		Radioligand Displacement	Not specified	InChI=1S/C15H14IN3/c1-18(2)13-6-3-11(4-7-13)14-10-19-9-12(16)5-8-15(19)17-14/h3-10H,1-2H3	InChI=1S/C15H14IN3/c1-18(2)13-6-3-11(4-7-13)14-10-19-9-12(16)5-8-15(19)17-14/h3-10H,1-2H3	363.202	3.6719	87.672	3	0	20.54	3	2	3	0	0.133333333	19	0	0	1	2	4	0	0	0	0.377660894	0.136976662	0.136976662	-0.377660894	15	3	19	0.789473684	0.157894737	0
PiB	OC1=CC=C(N=C(C2=CC=C(NC)C=C2)S3)C3=C1	10.1016/j.bmcl.2011.03.052			11	11		0.2	-7.958607315	[3H]BTA-1	Ab40	f	Not specified	Not specified		Radioligand Displacement	Not specified	InChI=1S/C14H12N2OS/c1-15-10-4-2-9(3-5-10)14-16-12-7-6-11(17)8-13(12)18-14/h2-8,15,17H,1H3	InChI=1S/C14H12N2OS/c1-15-10-4-2-9(3-5-10)14-16-12-7-6-11(17)8-13(12)18-14/h2-8,15,17H,1H3	256.33	3.7106	76.2675	4	2	45.15	3	2	3	0	0.071428571	18	0	0	2	1	4	0	0	0	0.507910913	0.124107303	0.124107303	-0.507910913	14	4	18	0.777777778	0.222222222	0
BZ-OB	F[B-]1(OC(/C=C/C2=CC(C=CC(N(C)C)=C3)=C3O2)=CC(CC(C)C)=[O+]1)F	10.1016/j.bioactmat.2021.10.047		21.56		21.56		9.45	-7.666351243		Ab42	f		0.5 mL of 2 mM sodiumhydride aqueous solution was added into the purchased Aβ1-42 kit and treated with sonication at 0 ◦C for 30 min. 0.6 mL of 20 mM PBS was added to the sonicated solution, then incubated with an orbital shaker (300 rpm) at 37 ◦C for 72 h. The solution was diluted to experimental concentration with 10 mM PBS (pH = 7.4) before each experiment.		Fluorescence Saturation	Not specified	InChI=1S/C19H22BF2NO3/c1-13(2)9-18-12-17(25-20(21,22)26-18)8-7-16-10-14-5-6-15(23(3)4)11-19(14)24-16/h5-8,10-13H,9H2,1-4H3/b8-7+	InChI=1S/C19H22BF2NO3/c1-13(2)9-18-12-17(25-20(21,22)26-18)8-7-16-10-14-5-6-15(23(3)4)11-19(14)24-16/h5-8,10-13H,9H2,1-4H3/b8-7+	361.197	4.9516	101.175	3	0	36.91	3	5	2	1	0.315789474	26	0	1	1	1	7	0	0	0	0.994379675	0.994379675	0.569129117	-0.569129117	19	4	26	0.730769231	0.153846154	0
NAP-OB	F[B-]1(OC(/C=C/C2=CC(C=CC(N(C)C)=C3)=C3C=C2)=CC(CC(C)C)=[O+]1)F	10.1016/j.bioactmat.2021.10.047		0.62		0.62		0.33	-9.207608311		Ab42	f		0.5 mL of 2 mM sodiumhydride aqueous solution was added into the purchased Aβ1-42 kit and treated with sonication at 0 ◦C for 30 min. 0.6 mL of 20 mM PBS was added to the sonicated solution, then incubated with an orbital shaker (300 rpm) at 37 ◦C for 72 h. The solution was diluted to experimental concentration with 10 mM PBS (pH = 7.4) before each experiment.		Fluorescence Saturation	Not specified	InChI=1S/C21H24BF2NO2/c1-15(2)11-21-14-20(26-22(23,24)27-21)10-6-16-5-7-18-13-19(25(3)4)9-8-17(18)12-16/h5-10,12-15H,11H2,1-4H3/b10-6+	InChI=1S/C21H24BF2NO2/c1-15(2)11-21-14-20(26-22(23,24)27-21)10-6-16-5-7-18-13-19(25(3)4)9-8-17(18)12-16/h5-10,12-15H,11H2,1-4H3/b10-6+	371.236	5.3586	108.909	2	0	23.77	3	5	2	1	0.285714286	27	0	1	2	0	6	0	0	0	0.994379666	0.994379666	0.569130378	-0.569130378	21	3	27	0.777777778	0.111111111	0
Anumala01	O=C(/C(SC1=S)=C/C2=CC=C(C3=CC=CC=C3)O2)N1CC(O)=O	10.1016/j.bmc.2013.06.039			331	331	662		-6.480172006	ThR	t	f	Recombinant human 4R tau (E. Coli)	Tau protein was aggregated at 5 uM concentration with arachidonic acid (100 uM) in Tris 10 mM pH 8, 24 h at 37 °C		Fluorescence Displacement	For the displacement assay, Thiazine red R was added at same concentration of the Kd to the respective aggregated binding sites (Kd for aggregated tau = 18 nM, Kd for aggregated Ab = 49 nM). To determine the affinity of the required probe, the probe was added at different concentrations in the assay ranging from 0.1 to 10,000 nM. Auto fluorescence of the probe was measured together with aggregate…	InChI=1S/C16H11NO4S2/c18-14(19)9-17-15(20)13(23-16(17)22)8-11-6-7-12(21-11)10-4-2-1-3-5-10/h1-8H,9H2,(H,18,19)/b13-8-	InChI=1S/C16H11NO4S2/c18-14(19)9-17-15(20)13(23-16(17)22)8-11-6-7-12(21-11)10-4-2-1-3-5-10/h1-8H,9H2,(H,18,19)/b13-8-	345.401	3.2324	91.6588	5	1	70.75	3	4	2	1	0.0625	23	0	1	1	1	7	0	1	1	0.479913045	0.323207467	0.323207467	-0.479913045	16	7	23	0.695652174	0.304347826	0
Anumala01	O=C(/C(SC1=S)=C/C2=CC=C(C3=CC=CC=C3)O2)N1CC(O)=O	10.1016/j.bmc.2013.06.039			2501	2501	5002		-5.601886308	ThR	Ab40	f	Synthetic	Ab40 was aggregated at a concentration of 50 uM with arachidonic acid (100 uM) in Tris 10 mM pH 8, for three days at 37 °C.		Fluorescence Displacement	To the aggregation solution was added ThS (49 nM) and probe in DMSO (5 vol.% final)	InChI=1S/C16H11NO4S2/c18-14(19)9-17-15(20)13(23-16(17)22)8-11-6-7-12(21-11)10-4-2-1-3-5-10/h1-8H,9H2,(H,18,19)/b13-8-	InChI=1S/C16H11NO4S2/c18-14(19)9-17-15(20)13(23-16(17)22)8-11-6-7-12(21-11)10-4-2-1-3-5-10/h1-8H,9H2,(H,18,19)/b13-8-	345.401	3.2324	91.6588	5	1	70.75	3	4	2	1	0.0625	23	0	1	1	1	7	0	1	1	0.479913045	0.323207467	0.323207467	-0.479913045	16	7	23	0.695652174	0.304347826	0
Anumala02	O=C(/C(SC1=S)=C/C=C/C2=CC=C(N(C)C)C=C2)N1CC(O)=O	10.1016/j.bmc.2013.06.039			16	16	32		-7.795880017	ThR	t	f	Recombinant human 4R tau (E. Coli)	Tau protein was aggregated at 5 uM concentration with arachidonic acid (100 uM) in Tris 10 mM pH 8, 24 h at 37 °C		Fluorescence Displacement	For the displacement assay, Thiazine red R was added at same concentration of the Kd to the respective aggregated binding sites (Kd for aggregated tau = 18 nM, Kd for aggregated Ab = 49 nM). To determine the affinity of the required probe, the probe was added at different concentrations in the assay ranging from 0.1 to 10,000 nM. Auto fluorescence of the probe was measured together with aggregate…	InChI=1S/C16H16N2O3S2/c1-17(2)12-8-6-11(7-9-12)4-3-5-13-15(21)18(10-14(19)20)16(22)23-13/h3-9H,10H2,1-2H3,(H,19,20)/b4-3+,13-5-	InChI=1S/C16H16N2O3S2/c1-17(2)12-8-6-11(7-9-12)4-3-5-13-15(21)18(10-14(19)20)16(22)23-13/h3-9H,10H2,1-2H3,(H,19,20)/b4-3+,13-5-	348.449	2.5946	97.4238	5	1	60.85	2	5	1	1	0.1875	23	0	1	1	0	7	0	1	1	0.479913045	0.323207467	0.323207467	-0.479913045	16	7	23	0.695652174	0.304347826	0
Anumala02	O=C(/C(SC1=S)=C/C=C/C2=CC=C(N(C)C)C=C2)N1CC(O)=O	10.1016/j.bmc.2013.06.039			27.5	27.5	55		-7.560667306	ThR	Ab40	f	Synthetic	Ab40 was aggregated at a concentration of 50 uM with arachidonic acid (100 uM) in Tris 10 mM pH 8, for three days at 37 °C.		Fluorescence Displacement	To the aggregation solution was added ThS (49 nM) and probe in DMSO (5 vol.% final)	InChI=1S/C16H16N2O3S2/c1-17(2)12-8-6-11(7-9-12)4-3-5-13-15(21)18(10-14(19)20)16(22)23-13/h3-9H,10H2,1-2H3,(H,19,20)/b4-3+,13-5-	InChI=1S/C16H16N2O3S2/c1-17(2)12-8-6-11(7-9-12)4-3-5-13-15(21)18(10-14(19)20)16(22)23-13/h3-9H,10H2,1-2H3,(H,19,20)/b4-3+,13-5-	348.449	2.5946	97.4238	5	1	60.85	2	5	1	1	0.1875	23	0	1	1	0	7	0	1	1	0.479913045	0.323207467	0.323207467	-0.479913045	16	7	23	0.695652174	0.304347826	0
Anumala03	O=C(/C(SC1=S)=C/C2=CC=C(C3=CC=CS3)S2)N1CC(O)=O	10.1016/j.bmc.2013.06.039			21.5	21.5	43		-7.66756154	ThR	t	f	Recombinant human 4R tau (E. Coli)	Tau protein was aggregated at 5 uM concentration with arachidonic acid (100 uM) in Tris 10 mM pH 8, 24 h at 37 °C		Fluorescence Displacement	For the displacement assay, Thiazine red R was added at same concentration of the Kd to the respective aggregated binding sites (Kd for aggregated tau = 18 nM, Kd for aggregated Ab = 49 nM). To determine the affinity of the required probe, the probe was added at different concentrations in the assay ranging from 0.1 to 10,000 nM. Auto fluorescence of the probe was measured together with aggregate…	InChI=1S/C14H9NO3S4/c16-12(17)7-15-13(18)11(22-14(15)19)6-8-3-4-10(21-8)9-2-1-5-20-9/h1-6H,7H2,(H,16,17)/b11-6-	InChI=1S/C14H9NO3S4/c16-12(17)7-15-13(18)11(22-14(15)19)6-8-3-4-10(21-8)9-2-1-5-20-9/h1-6H,7H2,(H,16,17)/b11-6-	367.498	3.7624	95.1468	6	1	57.61	3	4	2	1	0.071428571	22	0	1	0	2	8	0	1	1	0.479913045	0.323207467	0.323207467	-0.479913045	14	8	22	0.636363636	0.363636364	0
Anumala03	O=C(/C(SC1=S)=C/C2=CC=C(C3=CC=CS3)S2)N1CC(O)=O	10.1016/j.bmc.2013.06.039			146	146	292		-6.835647144	ThR	Ab40	f	Synthetic	Ab40 was aggregated at a concentration of 50 uM with arachidonic acid (100 uM) in Tris 10 mM pH 8, for three days at 37 °C.		Fluorescence Displacement	To the aggregation solution was added ThS (49 nM) and probe in DMSO (5 vol.% final)	InChI=1S/C14H9NO3S4/c16-12(17)7-15-13(18)11(22-14(15)19)6-8-3-4-10(21-8)9-2-1-5-20-9/h1-6H,7H2,(H,16,17)/b11-6-	InChI=1S/C14H9NO3S4/c16-12(17)7-15-13(18)11(22-14(15)19)6-8-3-4-10(21-8)9-2-1-5-20-9/h1-6H,7H2,(H,16,17)/b11-6-	367.498	3.7624	95.1468	6	1	57.61	3	4	2	1	0.071428571	22	0	1	0	2	8	0	1	1	0.479913045	0.323207467	0.323207467	-0.479913045	14	8	22	0.636363636	0.363636364	0
Anumala04	O=C(/C(SC1=S)=C/C2=CC=C(C3=CC=C(OC)C=C3)S2)N1CC(O)=O	10.1016/j.bmc.2013.06.039			14	14	28		-7.853871964	ThR	t	f	Recombinant human 4R tau (E. Coli)	Tau protein was aggregated at 5 uM concentration with arachidonic acid (100 uM) in Tris 10 mM pH 8, 24 h at 37 °C		Fluorescence Displacement	For the displacement assay, Thiazine red R was added at same concentration of the Kd to the respective aggregated binding sites (Kd for aggregated tau = 18 nM, Kd for aggregated Ab = 49 nM). To determine the affinity of the required probe, the probe was added at different concentrations in the assay ranging from 0.1 to 10,000 nM. Auto fluorescence of the probe was measured together with aggregate…	InChI=1S/C17H13NO4S3/c1-22-11-4-2-10(3-5-11)13-7-6-12(24-13)8-14-16(21)18(9-15(19)20)17(23)25-14/h2-8H,9H2,1H3,(H,19,20)/b14-8-	InChI=1S/C17H13NO4S3/c1-22-11-4-2-10(3-5-11)13-7-6-12(24-13)8-14-16(21)18(9-15(19)20)17(23)25-14/h2-8H,9H2,1H3,(H,19,20)/b14-8-	391.495	3.7095	103.8218	6	1	66.84	3	5	2	1	0.117647059	25	0	1	1	1	8	0	1	1	0.496767811	0.323207467	0.323207467	-0.496767811	17	8	25	0.68	0.32	0
Anumala04	O=C(/C(SC1=S)=C/C2=CC=C(C3=CC=C(OC)C=C3)S2)N1CC(O)=O	10.1016/j.bmc.2013.06.039			45.5	45.5	91		-7.341988603	ThR	Ab40	f	Synthetic	Ab40 was aggregated at a concentration of 50 uM with arachidonic acid (100 uM) in Tris 10 mM pH 8, for three days at 37 °C.		Fluorescence Displacement	To the aggregation solution was added ThS (49 nM) and probe in DMSO (5 vol.% final)	InChI=1S/C17H13NO4S3/c1-22-11-4-2-10(3-5-11)13-7-6-12(24-13)8-14-16(21)18(9-15(19)20)17(23)25-14/h2-8H,9H2,1H3,(H,19,20)/b14-8-	InChI=1S/C17H13NO4S3/c1-22-11-4-2-10(3-5-11)13-7-6-12(24-13)8-14-16(21)18(9-15(19)20)17(23)25-14/h2-8H,9H2,1H3,(H,19,20)/b14-8-	391.495	3.7095	103.8218	6	1	66.84	3	5	2	1	0.117647059	25	0	1	1	1	8	0	1	1	0.496767811	0.323207467	0.323207467	-0.496767811	17	8	25	0.68	0.32	0
Anumala05	O=C(/C(SC1=S)=C/C2=CC=C(N3CCCC3)C=C2)N1CC(O)=O	10.1016/j.bmc.2013.06.039			31.5	31.5	63		-7.501689446	ThR	t	f	Recombinant human 4R tau (E. Coli)	Tau protein was aggregated at 5 uM concentration with arachidonic acid (100 uM) in Tris 10 mM pH 8, 24 h at 37 °C		Fluorescence Displacement	For the displacement assay, Thiazine red R was added at same concentration of the Kd to the respective aggregated binding sites (Kd for aggregated tau = 18 nM, Kd for aggregated Ab = 49 nM). To determine the affinity of the required probe, the probe was added at different concentrations in the assay ranging from 0.1 to 10,000 nM. Auto fluorescence of the probe was measured together with aggregate…	InChI=1S/C16H16N2O3S2/c19-14(20)10-18-15(21)13(23-16(18)22)9-11-3-5-12(6-4-11)17-7-1-2-8-17/h3-6,9H,1-2,7-8,10H2,(H,19,20)/b13-9-	InChI=1S/C16H16N2O3S2/c19-14(20)10-18-15(21)13(23-16(18)22)9-11-3-5-12(6-4-11)17-7-1-2-8-17/h3-6,9H,1-2,7-8,10H2,(H,19,20)/b13-9-	348.449	2.5726	95.4038	5	1	60.85	3	4	1	2	0.3125	23	0	2	1	0	7	0	2	2	0.479913045	0.323207467	0.323207467	-0.479913045	16	7	23	0.695652174	0.304347826	0
Anumala05	O=C(/C(SC1=S)=C/C2=CC=C(N3CCCC3)C=C2)N1CC(O)=O	10.1016/j.bmc.2013.06.039			109	109	218		-6.962573502	ThR	Ab40	f	Synthetic	Ab40 was aggregated at a concentration of 50 uM with arachidonic acid (100 uM) in Tris 10 mM pH 8, for three days at 37 °C.		Fluorescence Displacement	To the aggregation solution was added ThS (49 nM) and probe in DMSO (5 vol.% final)	InChI=1S/C16H16N2O3S2/c19-14(20)10-18-15(21)13(23-16(18)22)9-11-3-5-12(6-4-11)17-7-1-2-8-17/h3-6,9H,1-2,7-8,10H2,(H,19,20)/b13-9-	InChI=1S/C16H16N2O3S2/c19-14(20)10-18-15(21)13(23-16(18)22)9-11-3-5-12(6-4-11)17-7-1-2-8-17/h3-6,9H,1-2,7-8,10H2,(H,19,20)/b13-9-	348.449	2.5726	95.4038	5	1	60.85	3	4	1	2	0.3125	23	0	2	1	0	7	0	2	2	0.479913045	0.323207467	0.323207467	-0.479913045	16	7	23	0.695652174	0.304347826	0
Anumala06	O=C(/C(SC1=S)=C/C2=CC(SC3=CC=CC=C3N4CCCCCCCC)=C4C=C2)N1CC(O)=O	10.1016/j.bmc.2013.06.039			9.5	9.5	19		-8.022276395	ThR	t	f	Recombinant human 4R tau (E. Coli)	Tau protein was aggregated at 5 uM concentration with arachidonic acid (100 uM) in Tris 10 mM pH 8, 24 h at 37 °C		Fluorescence Displacement	For the displacement assay, Thiazine red R was added at same concentration of the Kd to the respective aggregated binding sites (Kd for aggregated tau = 18 nM, Kd for aggregated Ab = 49 nM). To determine the affinity of the required probe, the probe was added at different concentrations in the assay ranging from 0.1 to 10,000 nM. Auto fluorescence of the probe was measured together with aggregate…	InChI=1S/C26H28N2O3S3/c1-2-3-4-5-6-9-14-27-19-10-7-8-11-21(19)33-22-15-18(12-13-20(22)27)16-23-25(31)28(17-24(29)30)26(32)34-23/h7-8,10-13,15-16H,2-6,9,14,17H2,1H3,(H,29,30)/b23-16-	InChI=1S/C26H28N2O3S3/c1-2-3-4-5-6-9-14-27-19-10-7-8-11-21(19)33-22-15-18(12-13-20(22)27)16-23-25(31)28(17-24(29)30)26(32)34-23/h7-8,10-13,15-16H,2-6,9,14,17H2,1H3,(H,29,30)/b23-16-	512.722	6.9356	144.9038	6	1	60.85	4	10	2	2	0.346153846	34	0	2	2	0	8	0	1	1	0.479913045	0.323207467	0.323207467	-0.479913045	26	8	34	0.764705882	0.235294118	0
Anumala06	O=C(/C(SC1=S)=C/C2=CC(SC3=CC=CC=C3N4CCCCCCCC)=C4C=C2)N1CC(O)=O	10.1016/j.bmc.2013.06.039			45.5	45.5	91		-7.341988603	ThR	Ab40	f	Synthetic	Ab40 was aggregated at a concentration of 50 uM with arachidonic acid (100 uM) in Tris 10 mM pH 8, for three days at 37 °C.		Fluorescence Displacement	To the aggregation solution was added ThS (49 nM) and probe in DMSO (5 vol.% final)	InChI=1S/C26H28N2O3S3/c1-2-3-4-5-6-9-14-27-19-10-7-8-11-21(19)33-22-15-18(12-13-20(22)27)16-23-25(31)28(17-24(29)30)26(32)34-23/h7-8,10-13,15-16H,2-6,9,14,17H2,1H3,(H,29,30)/b23-16-	InChI=1S/C26H28N2O3S3/c1-2-3-4-5-6-9-14-27-19-10-7-8-11-21(19)33-22-15-18(12-13-20(22)27)16-23-25(31)28(17-24(29)30)26(32)34-23/h7-8,10-13,15-16H,2-6,9,14,17H2,1H3,(H,29,30)/b23-16-	512.722	6.9356	144.9038	6	1	60.85	4	10	2	2	0.346153846	34	0	2	2	0	8	0	1	1	0.479913045	0.323207467	0.323207467	-0.479913045	26	8	34	0.764705882	0.235294118	0
Anumala07	O=C(/C(SC1=S)=C/C2=CC(SC3=CC=CC=C3N4C)=C4C=C2)N1CC(O)=O	10.1016/j.bmc.2013.06.039			119	119	238		-6.924453039	ThR	t	f	Recombinant human 4R tau (E. Coli)	Tau protein was aggregated at 5 uM concentration with arachidonic acid (100 uM) in Tris 10 mM pH 8, 24 h at 37 °C		Fluorescence Displacement	For the displacement assay, Thiazine red R was added at same concentration of the Kd to the respective aggregated binding sites (Kd for aggregated tau = 18 nM, Kd for aggregated Ab = 49 nM). To determine the affinity of the required probe, the probe was added at different concentrations in the assay ranging from 0.1 to 10,000 nM. Auto fluorescence of the probe was measured together with aggregate…	InChI=1S/C19H14N2O3S3/c1-20-12-4-2-3-5-14(12)26-15-8-11(6-7-13(15)20)9-16-18(24)21(10-17(22)23)19(25)27-16/h2-9H,10H2,1H3,(H,22,23)/b16-9-	InChI=1S/C19H14N2O3S3/c1-20-12-4-2-3-5-14(12)26-15-8-11(6-7-13(15)20)9-16-18(24)21(10-17(22)23)19(25)27-16/h2-9H,10H2,1H3,(H,22,23)/b16-9-	414.533	4.2049	112.5848	6	1	60.85	4	3	2	2	0.105263158	27	0	2	2	0	8	0	1	1	0.479913045	0.323207467	0.323207467	-0.479913045	19	8	27	0.703703704	0.296296296	0
Anumala07	O=C(/C(SC1=S)=C/C2=CC(SC3=CC=CC=C3N4C)=C4C=C2)N1CC(O)=O	10.1016/j.bmc.2013.06.039			578	578	1156		-6.238072162	ThR	Ab40	f	Synthetic	Ab40 was aggregated at a concentration of 50 uM with arachidonic acid (100 uM) in Tris 10 mM pH 8, for three days at 37 °C.		Fluorescence Displacement	To the aggregation solution was added ThS (49 nM) and probe in DMSO (5 vol.% final)	InChI=1S/C19H14N2O3S3/c1-20-12-4-2-3-5-14(12)26-15-8-11(6-7-13(15)20)9-16-18(24)21(10-17(22)23)19(25)27-16/h2-9H,10H2,1H3,(H,22,23)/b16-9-	InChI=1S/C19H14N2O3S3/c1-20-12-4-2-3-5-14(12)26-15-8-11(6-7-13(15)20)9-16-18(24)21(10-17(22)23)19(25)27-16/h2-9H,10H2,1H3,(H,22,23)/b16-9-	414.533	4.2049	112.5848	6	1	60.85	4	3	2	2	0.105263158	27	0	2	2	0	8	0	1	1	0.479913045	0.323207467	0.323207467	-0.479913045	19	8	27	0.703703704	0.296296296	0
[125I]SIL23	[125I]/C=C/COC1=CC(SC2=CC([N+]([O-])=O)=CC=C2N3)=C3C=C1	10.1371/journal.pone.0055031		148		148			-6.829738285		aS	f	Recombinant (E. Coli)	Purified recombinant a-syn monomer (2 mg/ml) was incubated in 20 mM Tris-HCl, pH 8.0, 100 mM NaCl for 72 h at 37 degC with shaking at 1000 rpm in an Eppendorf Thermomixer. To determine the concentration of fibrils, the fibril reaction mix was centrifuged at 15,000xg for 15 min to separate fibrils from monomer. The concentration of a-syn monomer in the supernatant was determined in a BCA protein a…		Radioligand Saturation	The prepared fibril mixture was centrifuged at 15,000xg for 15 min to prepare fibrils for binding assays. The supernatant was discarded and the fibril pellet was resuspended in 30 mM Tris- HCl pH 7.4, 0.1% BSA to achieve the desired concentration of fibrils for use in the assay. A fixed concentration (1 mM/well) of a-syn, Ab, or tau fibrils were incubated for 2 h at 37 degC with increasing concen…	InChI=1S/C15H11IN2O3S/c16-6-1-7-21-11-3-5-13-15(9-11)22-14-8-10(18(19)20)2-4-12(14)17-13/h1-6,8-9,17H,7H2/b6-1+/i16-2	InChI=1S/C15H11IN2O3S/c16-6-1-7-21-11-3-5-13-15(9-11)22-14-8-10(18(19)20)2-4-12(14)17-13/h1-6,8-9,17H,7H2/b6-1+	424.2356302	5.1305	95.5991	5	1	64.4	3	4	2	1	0.066666667	22	0	1	2	0	7	0	0	0	0.489473851	0.270212358	0.270212358	-0.489473851	15	6	22	0.681818182	0.272727273	0
[125I]SIL23	[125I]/C=C/COC1=CC(SC2=CC([N+]([O-])=O)=CC=C2N3)=C3C=C1	10.1371/journal.pone.0055031		635		635			-6.197226275		Ab42	f	Bachem Bioscience, Inc. (Torrance, CA. USA)	Synthetic Ab1–42 peptide (1 mg) (Bachem, Torrance, CA) was first dissolved in 50 mL DMSO. An additional 925 ml of mQ-H2O was added. Finally, 25 ml 1M Tris-HCl pH 7.6 was added to bring the final peptide concentration to 222 mM (1mg/mL). The dissolved peptide was incubated for 30 h at 37 degC with shaking at 1000 rpm in an Eppendorf Thermomixer. Fibril formation was confirmed by ThioT fluorescence…		Radioligand Saturation	The prepared fibril mixture was centrifuged at 15,000xg for 15 min to prepare fibrils for binding assays. The supernatant was discarded and the fibril pellet was resuspended in 30 mM Tris- HCl pH 7.4, 0.1% BSA to achieve the desired concentration of fibrils for use in the assay. A fixed concentration (1 mM/well) of a-syn, Ab, or tau fibrils were incubated for 2 h at 37 degC with increasing concen…	InChI=1S/C15H11IN2O3S/c16-6-1-7-21-11-3-5-13-15(9-11)22-14-8-10(18(19)20)2-4-12(14)17-13/h1-6,8-9,17H,7H2/b6-1+/i16-2	InChI=1S/C15H11IN2O3S/c16-6-1-7-21-11-3-5-13-15(9-11)22-14-8-10(18(19)20)2-4-12(14)17-13/h1-6,8-9,17H,7H2/b6-1+	424.2356302	5.1305	95.5991	5	1	64.4	3	4	2	1	0.066666667	22	0	1	2	0	7	0	0	0	0.489473851	0.270212358	0.270212358	-0.489473851	15	6	22	0.681818182	0.272727273	0
[125I]SIL23	[125I]/C=C/COC1=CC(SC2=CC([N+]([O-])=O)=CC=C2N3)=C3C=C1	10.1371/journal.pone.0055031		230		230			-6.638272164		t	f	Expressed 4R tau fragment 243-375 (E. Coli)	Purified recombinant tau monomer (300 mg/ml) was incubated in 20 mM Tris-HCl pH 8.0, 100 mM NaCl, 25 mM low molecular weight heparin, 0.5 mM DTT for 48 h at 37 degC with shaking at 1000 rpm in an Eppendorf Thermomixer. To determine the concentration of fibrils, the fibril reaction mixer was centrifuged at 15,000xg for 15 min to separate fibrils from monomer. The concentration of tau monomer in th…		Radioligand Saturation	The prepared fibril mixture was centrifuged at 15,000xg for 15 min to prepare fibrils for binding assays. The supernatant was discarded and the fibril pellet was resuspended in 30 mM Tris- HCl pH 7.4, 0.1% BSA to achieve the desired concentration of fibrils for use in the assay. A fixed concentration (1 mM/well) of a-syn, Ab, or tau fibrils were incubated for 2 h at 37 degC with increasing concen…	InChI=1S/C15H11IN2O3S/c16-6-1-7-21-11-3-5-13-15(9-11)22-14-8-10(18(19)20)2-4-12(14)17-13/h1-6,8-9,17H,7H2/b6-1+/i16-2	InChI=1S/C15H11IN2O3S/c16-6-1-7-21-11-3-5-13-15(9-11)22-14-8-10(18(19)20)2-4-12(14)17-13/h1-6,8-9,17H,7H2/b6-1+	424.2356302	5.1305	95.5991	5	1	64.4	3	4	2	1	0.066666667	22	0	1	2	0	7	0	0	0	0.489473851	0.270212358	0.270212358	-0.489473851	15	6	22	0.681818182	0.272727273	0
SIL22	BrC1=CC(SC2=CC([N+]([O-])=O)=CC=C2N3)=C3C=C1	10.1371/journal.pone.0055031			31.9	31.9			-7.496209317	[125I]SIL23	aS	f	Recombinant (E. Coli)	Purified recombinant a-syn monomer (2 mg/ml) was incubated in 20 mM Tris-HCl, pH 8.0, 100 mM NaCl for 72 h at 37 degC with shaking at 1000 rpm in an Eppendorf Thermomixer. To determine the concentration of fibrils, the fibril reaction mix was centrifuged at 15,000xg for 15 min to separate fibrils from monomer. The concentration of a-syn monomer in the supernatant was determined in a BCA protein a…		Radioligand Displacement	The prepared fibril mixture was centrifuged at 15,000xg for 15 min to prepare fibrils for binding assays. The supernatant was discarded and the fibril pellet was resuspended in 30 mM Tris-HCl pH 7.4, 0.1% BSA to achieve the desired concentration of fibrils for use in the assay. Competition assays used a fixed concentration of fibrils (1 mM) and [125I]SIL23 (200 nM, consisting of a ratio of 1:400 …	InChI=1S/C12H7BrN2O2S/c13-7-1-3-9-11(5-7)18-12-6-8(15(16)17)2-4-10(12)14-9/h1-6,14H	InChI=1S/C12H7BrN2O2S/c13-7-1-3-9-11(5-7)18-12-6-8(15(16)17)2-4-10(12)14-9/h1-6,14H	323.171	4.5655	74.6441	4	1	55.17	3	1	2	1	0	18	0	1	2	0	6	0	0	0	0.353669431	0.270212358	0.270212358	-0.353669431	12	5	18	0.666666667	0.277777778	0
SIL22	BrC1=CC(SC2=CC([N+]([O-])=O)=CC=C2N3)=C3C=C1	10.1371/journal.pone.0055031			102	102			-6.991399828	[125I]SIL23	Ab42	f	Bachem Bioscience, Inc. (Torrance, CA. USA)	Synthetic Ab1–42 peptide (1 mg) (Bachem, Torrance, CA) was first dissolved in 50 mL DMSO. An additional 925 ml of mQ-H2O was added. Finally, 25 ml 1M Tris-HCl pH 7.6 was added to bring the final peptide concentration to 222 mM (1mg/mL). The dissolved peptide was incubated for 30 h at 37 degC with shaking at 1000 rpm in an Eppendorf Thermomixer. Fibril formation was confirmed by ThioT fluorescence…		Radioligand Displacement	The prepared fibril mixture was centrifuged at 15,000xg for 15 min to prepare fibrils for binding assays. The supernatant was discarded and the fibril pellet was resuspended in 30 mM Tris-HCl pH 7.4, 0.1% BSA to achieve the desired concentration of fibrils for use in the assay. Competition assays used a fixed concentration of fibrils (1 mM) and [125I]SIL23 (200 nM, consisting of a ratio of 1:400 …	InChI=1S/C12H7BrN2O2S/c13-7-1-3-9-11(5-7)18-12-6-8(15(16)17)2-4-10(12)14-9/h1-6,14H	InChI=1S/C12H7BrN2O2S/c13-7-1-3-9-11(5-7)18-12-6-8(15(16)17)2-4-10(12)14-9/h1-6,14H	323.171	4.5655	74.6441	4	1	55.17	3	1	2	1	0	18	0	1	2	0	6	0	0	0	0.353669431	0.270212358	0.270212358	-0.353669431	12	5	18	0.666666667	0.277777778	0
SIL22	BrC1=CC(SC2=CC([N+]([O-])=O)=CC=C2N3)=C3C=C1	10.1371/journal.pone.0055031			173	173			-6.761953897	[125I]SIL23	t	f	Expressed 4R tau fragment 243-375 (E. Coli)	Purified recombinant tau monomer (300 mg/ml) was incubated in 20 mM Tris-HCl pH 8.0, 100 mM NaCl, 25 mM low molecular weight heparin, 0.5 mM DTT for 48 h at 37 degC with shaking at 1000 rpm in an Eppendorf Thermomixer. To determine the concentration of fibrils, the fibril reaction mixer was centrifuged at 15,000xg for 15 min to separate fibrils from monomer. The concentration of tau monomer in th…		Radioligand Displacement	The prepared fibril mixture was centrifuged at 15,000xg for 15 min to prepare fibrils for binding assays. The supernatant was discarded and the fibril pellet was resuspended in 30 mM Tris-HCl pH 7.4, 0.1% BSA to achieve the desired concentration of fibrils for use in the assay. Competition assays used a fixed concentration of fibrils (1 mM) and [125I]SIL23 (200 nM, consisting of a ratio of 1:400 …	InChI=1S/C12H7BrN2O2S/c13-7-1-3-9-11(5-7)18-12-6-8(15(16)17)2-4-10(12)14-9/h1-6,14H	InChI=1S/C12H7BrN2O2S/c13-7-1-3-9-11(5-7)18-12-6-8(15(16)17)2-4-10(12)14-9/h1-6,14H	323.171	4.5655	74.6441	4	1	55.17	3	1	2	1	0	18	0	1	2	0	6	0	0	0	0.353669431	0.270212358	0.270212358	-0.353669431	12	5	18	0.666666667	0.277777778	0
SIL26	FCCOC1=CC(SC2=CC([N+]([O-])=O)=CC=C2N3)=C3C=C1	10.1371/journal.pone.0055031			15.5	15.5			-7.809668302	[125I]SIL23	aS	f	Recombinant (E. Coli)	Purified recombinant a-syn monomer (2 mg/ml) was incubated in 20 mM Tris-HCl, pH 8.0, 100 mM NaCl for 72 h at 37 degC with shaking at 1000 rpm in an Eppendorf Thermomixer. To determine the concentration of fibrils, the fibril reaction mix was centrifuged at 15,000xg for 15 min to separate fibrils from monomer. The concentration of a-syn monomer in the supernatant was determined in a BCA protein a…		Radioligand Displacement	The prepared fibril mixture was centrifuged at 15,000xg for 15 min to prepare fibrils for binding assays. The supernatant was discarded and the fibril pellet was resuspended in 30 mM Tris-HCl pH 7.4, 0.1% BSA to achieve the desired concentration of fibrils for use in the assay. Competition assays used a fixed concentration of fibrils (1 mM) and [125I]SIL23 (200 nM, consisting of a ratio of 1:400 …	InChI=1S/C14H11FN2O3S/c15-5-6-20-10-2-4-12-14(8-10)21-13-7-9(17(18)19)1-3-11(13)16-12/h1-4,7-8,16H,5-6H2	InChI=1S/C14H11FN2O3S/c15-5-6-20-10-2-4-12-14(8-10)21-13-7-9(17(18)19)1-3-11(13)16-12/h1-4,7-8,16H,5-6H2	306.318	4.1513	78.4141	5	1	64.4	3	4	2	1	0.142857143	21	0	1	2	0	7	0	0	0	0.490828498	0.270212358	0.270212358	-0.490828498	14	6	21	0.666666667	0.285714286	0
SIL26	FCCOC1=CC(SC2=CC([N+]([O-])=O)=CC=C2N3)=C3C=C1	10.1371/journal.pone.0055031			103	103			-6.987162775	[125I]SIL23	Ab42	f	Bachem Bioscience, Inc. (Torrance, CA. USA)	Synthetic Ab1–42 peptide (1 mg) (Bachem, Torrance, CA) was first dissolved in 50 mL DMSO. An additional 925 ml of mQ-H2O was added. Finally, 25 ml 1M Tris-HCl pH 7.6 was added to bring the final peptide concentration to 222 mM (1mg/mL). The dissolved peptide was incubated for 30 h at 37 degC with shaking at 1000 rpm in an Eppendorf Thermomixer. Fibril formation was confirmed by ThioT fluorescence…		Radioligand Displacement	The prepared fibril mixture was centrifuged at 15,000xg for 15 min to prepare fibrils for binding assays. The supernatant was discarded and the fibril pellet was resuspended in 30 mM Tris-HCl pH 7.4, 0.1% BSA to achieve the desired concentration of fibrils for use in the assay. Competition assays used a fixed concentration of fibrils (1 mM) and [125I]SIL23 (200 nM, consisting of a ratio of 1:400 …	InChI=1S/C14H11FN2O3S/c15-5-6-20-10-2-4-12-14(8-10)21-13-7-9(17(18)19)1-3-11(13)16-12/h1-4,7-8,16H,5-6H2	InChI=1S/C14H11FN2O3S/c15-5-6-20-10-2-4-12-14(8-10)21-13-7-9(17(18)19)1-3-11(13)16-12/h1-4,7-8,16H,5-6H2	306.318	4.1513	78.4141	5	1	64.4	3	4	2	1	0.142857143	21	0	1	2	0	7	0	0	0	0.490828498	0.270212358	0.270212358	-0.490828498	14	6	21	0.666666667	0.285714286	0
SIL26	FCCOC1=CC(SC2=CC([N+]([O-])=O)=CC=C2N3)=C3C=C1	10.1371/journal.pone.0055031			125	125			-6.903089987	[125I]SIL23	t	f	Expressed 4R tau fragment 243-375 (E. Coli)	Purified recombinant tau monomer (300 mg/ml) was incubated in 20 mM Tris-HCl pH 8.0, 100 mM NaCl, 25 mM low molecular weight heparin, 0.5 mM DTT for 48 h at 37 degC with shaking at 1000 rpm in an Eppendorf Thermomixer. To determine the concentration of fibrils, the fibril reaction mixer was centrifuged at 15,000xg for 15 min to separate fibrils from monomer. The concentration of tau monomer in th…		Radioligand Displacement	The prepared fibril mixture was centrifuged at 15,000xg for 15 min to prepare fibrils for binding assays. The supernatant was discarded and the fibril pellet was resuspended in 30 mM Tris-HCl pH 7.4, 0.1% BSA to achieve the desired concentration of fibrils for use in the assay. Competition assays used a fixed concentration of fibrils (1 mM) and [125I]SIL23 (200 nM, consisting of a ratio of 1:400 …	InChI=1S/C14H11FN2O3S/c15-5-6-20-10-2-4-12-14(8-10)21-13-7-9(17(18)19)1-3-11(13)16-12/h1-4,7-8,16H,5-6H2	InChI=1S/C14H11FN2O3S/c15-5-6-20-10-2-4-12-14(8-10)21-13-7-9(17(18)19)1-3-11(13)16-12/h1-4,7-8,16H,5-6H2	306.318	4.1513	78.4141	5	1	64.4	3	4	2	1	0.142857143	21	0	1	2	0	7	0	0	0	0.490828498	0.270212358	0.270212358	-0.490828498	14	6	21	0.666666667	0.285714286	0
SIL3B	O=[N+](C1=CC=C(N2)C(SC3=C2C=CC=C3)=C1)[O-]	10.1371/journal.pone.0055031			19.9	19.9			-7.701146924	[125I]SIL23	aS	f	Recombinant (E. Coli)	Purified recombinant a-syn monomer (2 mg/ml) was incubated in 20 mM Tris-HCl, pH 8.0, 100 mM NaCl for 72 h at 37 degC with shaking at 1000 rpm in an Eppendorf Thermomixer. To determine the concentration of fibrils, the fibril reaction mix was centrifuged at 15,000xg for 15 min to separate fibrils from monomer. The concentration of a-syn monomer in the supernatant was determined in a BCA protein a…		Radioligand Displacement	The prepared fibril mixture was centrifuged at 15,000xg for 15 min to prepare fibrils for binding assays. The supernatant was discarded and the fibril pellet was resuspended in 30 mM Tris-HCl pH 7.4, 0.1% BSA to achieve the desired concentration of fibrils for use in the assay. Competition assays used a fixed concentration of fibrils (1 mM) and [125I]SIL23 (200 nM, consisting of a ratio of 1:400 …	InChI=1S/C12H8N2O2S/c15-14(16)8-5-6-10-12(7-8)17-11-4-2-1-3-9(11)13-10/h1-7,13H	InChI=1S/C12H8N2O2S/c15-14(16)8-5-6-10-12(7-8)17-11-4-2-1-3-9(11)13-10/h1-7,13H	244.275	3.803	66.9441	4	1	55.17	3	1	2	1	0	17	0	1	2	0	5	0	0	0	0.353670497	0.270212358	0.270212358	-0.353670497	12	5	17	0.705882353	0.294117647	0
SIL3B	O=[N+](C1=CC=C(N2)C(SC3=C2C=CC=C3)=C1)[O-]	10.1371/journal.pone.0055031			71.5	71.5			-7.145693958	[125I]SIL23	Ab42	f	Bachem Bioscience, Inc. (Torrance, CA. USA)	Synthetic Ab1–42 peptide (1 mg) (Bachem, Torrance, CA) was first dissolved in 50 mL DMSO. An additional 925 ml of mQ-H2O was added. Finally, 25 ml 1M Tris-HCl pH 7.6 was added to bring the final peptide concentration to 222 mM (1mg/mL). The dissolved peptide was incubated for 30 h at 37 degC with shaking at 1000 rpm in an Eppendorf Thermomixer. Fibril formation was confirmed by ThioT fluorescence…		Radioligand Displacement	The prepared fibril mixture was centrifuged at 15,000xg for 15 min to prepare fibrils for binding assays. The supernatant was discarded and the fibril pellet was resuspended in 30 mM Tris-HCl pH 7.4, 0.1% BSA to achieve the desired concentration of fibrils for use in the assay. Competition assays used a fixed concentration of fibrils (1 mM) and [125I]SIL23 (200 nM, consisting of a ratio of 1:400 …	InChI=1S/C12H8N2O2S/c15-14(16)8-5-6-10-12(7-8)17-11-4-2-1-3-9(11)13-10/h1-7,13H	InChI=1S/C12H8N2O2S/c15-14(16)8-5-6-10-12(7-8)17-11-4-2-1-3-9(11)13-10/h1-7,13H	244.275	3.803	66.9441	4	1	55.17	3	1	2	1	0	17	0	1	2	0	5	0	0	0	0.353670497	0.270212358	0.270212358	-0.353670497	12	5	17	0.705882353	0.294117647	0
SIL3B	O=[N+](C1=CC=C(N2)C(SC3=C2C=CC=C3)=C1)[O-]	10.1371/journal.pone.0055031			52.3	52.3			-7.281498311	[125I]SIL23	t	f	Expressed 4R tau fragment 243-375 (E. Coli)	Purified recombinant tau monomer (300 mg/ml) was incubated in 20 mM Tris-HCl pH 8.0, 100 mM NaCl, 25 mM low molecular weight heparin, 0.5 mM DTT for 48 h at 37 degC with shaking at 1000 rpm in an Eppendorf Thermomixer. To determine the concentration of fibrils, the fibril reaction mixer was centrifuged at 15,000xg for 15 min to separate fibrils from monomer. The concentration of tau monomer in th…		Radioligand Displacement	The prepared fibril mixture was centrifuged at 15,000xg for 15 min to prepare fibrils for binding assays. The supernatant was discarded and the fibril pellet was resuspended in 30 mM Tris-HCl pH 7.4, 0.1% BSA to achieve the desired concentration of fibrils for use in the assay. Competition assays used a fixed concentration of fibrils (1 mM) and [125I]SIL23 (200 nM, consisting of a ratio of 1:400 …	InChI=1S/C12H8N2O2S/c15-14(16)8-5-6-10-12(7-8)17-11-4-2-1-3-9(11)13-10/h1-7,13H	InChI=1S/C12H8N2O2S/c15-14(16)8-5-6-10-12(7-8)17-11-4-2-1-3-9(11)13-10/h1-7,13H	244.275	3.803	66.9441	4	1	55.17	3	1	2	1	0	17	0	1	2	0	5	0	0	0	0.353670497	0.270212358	0.270212358	-0.353670497	12	5	17	0.705882353	0.294117647	0
SIL5	COC1=CC(SC2=CC([N+]([O-])=O)=CC=C2N3)=C3C=C1	10.1371/journal.pone.0055031			66.2	66.2			-7.179142011	[125I]SIL23	aS	f	Recombinant (E. Coli)	Purified recombinant a-syn monomer (2 mg/ml) was incubated in 20 mM Tris-HCl, pH 8.0, 100 mM NaCl for 72 h at 37 degC with shaking at 1000 rpm in an Eppendorf Thermomixer. To determine the concentration of fibrils, the fibril reaction mix was centrifuged at 15,000xg for 15 min to separate fibrils from monomer. The concentration of a-syn monomer in the supernatant was determined in a BCA protein a…		Radioligand Displacement	The prepared fibril mixture was centrifuged at 15,000xg for 15 min to prepare fibrils for binding assays. The supernatant was discarded and the fibril pellet was resuspended in 30 mM Tris-HCl pH 7.4, 0.1% BSA to achieve the desired concentration of fibrils for use in the assay. Competition assays used a fixed concentration of fibrils (1 mM) and [125I]SIL23 (200 nM, consisting of a ratio of 1:400 …	InChI=1S/C13H10N2O3S/c1-18-9-3-5-11-13(7-9)19-12-6-8(15(16)17)2-4-10(12)14-11/h2-7,14H,1H3	InChI=1S/C13H10N2O3S/c1-18-9-3-5-11-13(7-9)19-12-6-8(15(16)17)2-4-10(12)14-11/h2-7,14H,1H3	274.301	3.8116	73.4961	5	1	64.4	3	2	2	1	0.076923077	19	0	1	2	0	6	0	0	0	0.496723278	0.270212358	0.270212358	-0.496723278	13	6	19	0.684210526	0.315789474	0
SIL5	COC1=CC(SC2=CC([N+]([O-])=O)=CC=C2N3)=C3C=C1	10.1371/journal.pone.0055031			110	110			-6.958607315	[125I]SIL23	Ab42	f	Bachem Bioscience, Inc. (Torrance, CA. USA)	Synthetic Ab1–42 peptide (1 mg) (Bachem, Torrance, CA) was first dissolved in 50 mL DMSO. An additional 925 ml of mQ-H2O was added. Finally, 25 ml 1M Tris-HCl pH 7.6 was added to bring the final peptide concentration to 222 mM (1mg/mL). The dissolved peptide was incubated for 30 h at 37 degC with shaking at 1000 rpm in an Eppendorf Thermomixer. Fibril formation was confirmed by ThioT fluorescence…		Radioligand Displacement	The prepared fibril mixture was centrifuged at 15,000xg for 15 min to prepare fibrils for binding assays. The supernatant was discarded and the fibril pellet was resuspended in 30 mM Tris-HCl pH 7.4, 0.1% BSA to achieve the desired concentration of fibrils for use in the assay. Competition assays used a fixed concentration of fibrils (1 mM) and [125I]SIL23 (200 nM, consisting of a ratio of 1:400 …	InChI=1S/C13H10N2O3S/c1-18-9-3-5-11-13(7-9)19-12-6-8(15(16)17)2-4-10(12)14-11/h2-7,14H,1H3	InChI=1S/C13H10N2O3S/c1-18-9-3-5-11-13(7-9)19-12-6-8(15(16)17)2-4-10(12)14-11/h2-7,14H,1H3	274.301	3.8116	73.4961	5	1	64.4	3	2	2	1	0.076923077	19	0	1	2	0	6	0	0	0	0.496723278	0.270212358	0.270212358	-0.496723278	13	6	19	0.684210526	0.315789474	0
SIL5	COC1=CC(SC2=CC([N+]([O-])=O)=CC=C2N3)=C3C=C1	10.1371/journal.pone.0055031			136	136			-6.866461092	[125I]SIL23	t	f	Expressed 4R tau fragment 243-375 (E. Coli)	Purified recombinant tau monomer (300 mg/ml) was incubated in 20 mM Tris-HCl pH 8.0, 100 mM NaCl, 25 mM low molecular weight heparin, 0.5 mM DTT for 48 h at 37 degC with shaking at 1000 rpm in an Eppendorf Thermomixer. To determine the concentration of fibrils, the fibril reaction mixer was centrifuged at 15,000xg for 15 min to separate fibrils from monomer. The concentration of tau monomer in th…		Radioligand Displacement	The prepared fibril mixture was centrifuged at 15,000xg for 15 min to prepare fibrils for binding assays. The supernatant was discarded and the fibril pellet was resuspended in 30 mM Tris-HCl pH 7.4, 0.1% BSA to achieve the desired concentration of fibrils for use in the assay. Competition assays used a fixed concentration of fibrils (1 mM) and [125I]SIL23 (200 nM, consisting of a ratio of 1:400 …	InChI=1S/C13H10N2O3S/c1-18-9-3-5-11-13(7-9)19-12-6-8(15(16)17)2-4-10(12)14-11/h2-7,14H,1H3	InChI=1S/C13H10N2O3S/c1-18-9-3-5-11-13(7-9)19-12-6-8(15(16)17)2-4-10(12)14-11/h2-7,14H,1H3	274.301	3.8116	73.4961	5	1	64.4	3	2	2	1	0.076923077	19	0	1	2	0	6	0	0	0	0.496723278	0.270212358	0.270212358	-0.496723278	13	6	19	0.684210526	0.315789474	0
[125I]SIL23	[125I]/C=C/COC1=CC(SC2=CC([N+]([O-])=O)=CC=C2N3)=C3C=C1	10.1371/journal.pone.0055031		135		135			-6.869666232		PD	b	Frontal cortex grey matter	Grey matter was isolated from frozen postmortem frontal cortex tissue by dissection with a scalpel. To prepare insoluble fractions, dissected tissue was sequentially homogenized in four buffers (3 mL/g wet weight of tissue) with glass Dounce tissue grinders (Kimble): 1) High salt (HS) buffer: 50 mM Tris-HCl pH 7.5, 750 mM NaCl, 5 mM EDTA; 2) HS buffer with 1% Triton X-100; 3) HS buffer with 1%Tri…		Radioligand Saturation	Binding of [125I]SIL23 to human brain homogenates was assessed by incubating 10 mg samples of insoluble fraction or 50 mg of crude brain tissue homogenate, from PD-dementia or control subjects, with increasing concentrations of [125I]SIL23 (6.25–600 nM). Nonspecific binding was determined in a duplicate set of binding reactions containing the competitor ThioT. Bound and free radioligand were sepa…	InChI=1S/C15H11IN2O3S/c16-6-1-7-21-11-3-5-13-15(9-11)22-14-8-10(18(19)20)2-4-12(14)17-13/h1-6,8-9,17H,7H2/b6-1+/i16-2	InChI=1S/C15H11IN2O3S/c16-6-1-7-21-11-3-5-13-15(9-11)22-14-8-10(18(19)20)2-4-12(14)17-13/h1-6,8-9,17H,7H2/b6-1+	424.2356302	5.1305	95.5991	5	1	64.4	3	4	2	1	0.066666667	22	0	1	2	0	7	0	0	0	0.489473851	0.270212358	0.270212358	-0.489473851	15	6	22	0.681818182	0.272727273	0
[125I]SIL23	[125I]/C=C/COC1=CC(SC2=CC([N+]([O-])=O)=CC=C2N3)=C3C=C1	10.1371/journal.pone.0055031		119		119			-6.924453039		PD	b	Frontal cortex grey matter	Grey matter was isolated from frozen postmortem frontal cortex tissue by dissection with a scalpel. To prepare insoluble fractions, dissected tissue was sequentially homogenized in four buffers (3 mL/g wet weight of tissue) with glass Dounce tissue grinders (Kimble): 1) High salt (HS) buffer: 50 mM Tris-HCl pH 7.5, 750 mM NaCl, 5 mM EDTA; 2) HS buffer with 1% Triton X-100; 3) HS buffer with 1%Tri…		Radioligand Saturation	Binding of [125I]SIL23 to human brain homogenates was assessed by incubating 10 mg samples of insoluble fraction or 50 mg of crude brain tissue homogenate, from PD-dementia or control subjects, with increasing concentrations of [125I]SIL23 (6.25–600 nM). Nonspecific binding was determined in a duplicate set of binding reactions containing the competitor ThioT. Bound and free radioligand were sepa…	InChI=1S/C15H11IN2O3S/c16-6-1-7-21-11-3-5-13-15(9-11)22-14-8-10(18(19)20)2-4-12(14)17-13/h1-6,8-9,17H,7H2/b6-1+/i16-2	InChI=1S/C15H11IN2O3S/c16-6-1-7-21-11-3-5-13-15(9-11)22-14-8-10(18(19)20)2-4-12(14)17-13/h1-6,8-9,17H,7H2/b6-1+	424.2356302	5.1305	95.5991	5	1	64.4	3	4	2	1	0.066666667	22	0	1	2	0	7	0	0	0	0.489473851	0.270212358	0.270212358	-0.489473851	15	6	22	0.681818182	0.272727273	0
[125I]SIL23	[125I]/C=C/COC1=CC(SC2=CC([N+]([O-])=O)=CC=C2N3)=C3C=C1	10.1371/journal.pone.0055031		125		125			-6.903089987		PD	b	Frontal cortex grey matter	Grey matter was isolated from frozen postmortem frontal cortex tissue by dissection with a scalpel. To prepare insoluble fractions, dissected tissue was sequentially homogenized in four buffers (3 mL/g wet weight of tissue) with glass Dounce tissue grinders (Kimble): 1) High salt (HS) buffer: 50 mM Tris-HCl pH 7.5, 750 mM NaCl, 5 mM EDTA; 2) HS buffer with 1% Triton X-100; 3) HS buffer with 1%Tri…		Radioligand Saturation	Binding of [125I]SIL23 to human brain homogenates was assessed by incubating 10 mg samples of insoluble fraction or 50 mg of crude brain tissue homogenate, from PD-dementia or control subjects, with increasing concentrations of [125I]SIL23 (6.25–600 nM). Nonspecific binding was determined in a duplicate set of binding reactions containing the competitor ThioT. Bound and free radioligand were sepa…	InChI=1S/C15H11IN2O3S/c16-6-1-7-21-11-3-5-13-15(9-11)22-14-8-10(18(19)20)2-4-12(14)17-13/h1-6,8-9,17H,7H2/b6-1+/i16-2	InChI=1S/C15H11IN2O3S/c16-6-1-7-21-11-3-5-13-15(9-11)22-14-8-10(18(19)20)2-4-12(14)17-13/h1-6,8-9,17H,7H2/b6-1+	424.2356302	5.1305	95.5991	5	1	64.4	3	4	2	1	0.066666667	22	0	1	2	0	7	0	0	0	0.489473851	0.270212358	0.270212358	-0.489473851	15	6	22	0.681818182	0.272727273	0
[125I]SIL23	[125I]/C=C/COC1=CC(SC2=CC([N+]([O-])=O)=CC=C2N3)=C3C=C1	10.1371/journal.pone.0055031		168		168			-6.774690718		PD	b	Frontal cortex grey matter	Grey matter was isolated from frozen postmortem frontal cortex tissue by dissection with a scalpel. To prepare insoluble fractions, dissected tissue was sequentially homogenized in four buffers (3 mL/g wet weight of tissue) with glass Dounce tissue grinders (Kimble): 1) High salt (HS) buffer: 50 mM Tris-HCl pH 7.5, 750 mM NaCl, 5 mM EDTA; 2) HS buffer with 1% Triton X-100; 3) HS buffer with 1%Tri…		Radioligand Saturation	Binding of [125I]SIL23 to human brain homogenates was assessed by incubating 10 mg samples of insoluble fraction or 50 mg of crude brain tissue homogenate, from PD-dementia or control subjects, with increasing concentrations of [125I]SIL23 (6.25–600 nM). Nonspecific binding was determined in a duplicate set of binding reactions containing the competitor ThioT. Bound and free radioligand were sepa…	InChI=1S/C15H11IN2O3S/c16-6-1-7-21-11-3-5-13-15(9-11)22-14-8-10(18(19)20)2-4-12(14)17-13/h1-6,8-9,17H,7H2/b6-1+/i16-2	InChI=1S/C15H11IN2O3S/c16-6-1-7-21-11-3-5-13-15(9-11)22-14-8-10(18(19)20)2-4-12(14)17-13/h1-6,8-9,17H,7H2/b6-1+	424.2356302	5.1305	95.5991	5	1	64.4	3	4	2	1	0.066666667	22	0	1	2	0	7	0	0	0	0.489473851	0.270212358	0.270212358	-0.489473851	15	6	22	0.681818182	0.272727273	0
SIL22	BrC1=CC(SC2=CC([N+]([O-])=O)=CC=C2N3)=C3C=C1	10.1371/journal.pone.0055031			31.9	31.9			-7.496209317	[125I]SIL23	aS	f	Recombinant (E. Coli)	Purified recombinant a-syn monomer (2 mg/ml) was incubated in 20 mM Tris-HCl, pH 8.0, 100 mM NaCl for 72 h at 37 degC with shaking at 1000 rpm in an Eppendorf Thermomixer. To determine the concentration of fibrils, the fibril reaction mix was centrifuged at 15,000xg for 15 min to separate fibrils from monomer. The concentration of a-syn monomer in the supernatant was determined in a BCA protein a…		Radioligand Displacement	The prepared fibril mixture was centrifuged at 15,000xg for 15 min to prepare fibrils for binding assays. The supernatant was discarded and the fibril pellet was resuspended in 30 mM Tris-HCl pH 7.4, 0.1% BSA to achieve the desired concentration of fibrils for use in the assay. Competition assays used a fixed concentration of fibrils (1 mM) and [125I]SIL23 (200 nM, consisting of a ratio of 1:400 …	InChI=1S/C12H7BrN2O2S/c13-7-1-3-9-11(5-7)18-12-6-8(15(16)17)2-4-10(12)14-9/h1-6,14H	InChI=1S/C12H7BrN2O2S/c13-7-1-3-9-11(5-7)18-12-6-8(15(16)17)2-4-10(12)14-9/h1-6,14H	323.171	4.5655	74.6441	4	1	55.17	3	1	2	1	0	18	0	1	2	0	6	0	0	0	0.353669431	0.270212358	0.270212358	-0.353669431	12	5	18	0.666666667	0.277777778	0
SIL22	BrC1=CC(SC2=CC([N+]([O-])=O)=CC=C2N3)=C3C=C1	10.1371/journal.pone.0055031			57.1	57.1			-7.243363892	[125I]SIL23	PD	b	Frontal cortex grey matter	Grey matter was isolated from frozen postmortem frontal cortex tissue by dissection with a scalpel. To prepare insoluble fractions, dissected tissue was sequentially homogenized in four buffers (3 mL/g wet weight of tissue) with glass Dounce tissue grinders (Kimble): 1) High salt (HS) buffer: 50 mM Tris-HCl pH 7.5, 750 mM NaCl, 5 mM EDTA; 2) HS buffer with 1% Triton X-100; 3) HS buffer with 1%Tri…		Radioligand Displacement	Competition assays used a fixed concentration of (10 mg/150 ml reaction) and [125I]SIL23 (200 nM, consisting of a ratio of 1:400 hot:cold SIL23) and varying concentration ranges of cold competitor, depending on the ligand. Competitors were diluted in 30 mM Tris-HCl pH 7.4, 0.1% BSA. Reactions were incubated at 37uC for 2 h before quantifying bound radioligand as described above for the saturation…	InChI=1S/C12H7BrN2O2S/c13-7-1-3-9-11(5-7)18-12-6-8(15(16)17)2-4-10(12)14-9/h1-6,14H	InChI=1S/C12H7BrN2O2S/c13-7-1-3-9-11(5-7)18-12-6-8(15(16)17)2-4-10(12)14-9/h1-6,14H	323.171	4.5655	74.6441	4	1	55.17	3	1	2	1	0	18	0	1	2	0	6	0	0	0	0.353669431	0.270212358	0.270212358	-0.353669431	12	5	18	0.666666667	0.277777778	0
SIL26	FCCOC1=CC(SC2=CC([N+]([O-])=O)=CC=C2N3)=C3C=C1	10.1371/journal.pone.0055031			15.5	15.5			-7.809668302	[125I]SIL23	aS	f	Recombinant (E. Coli)	Purified recombinant a-syn monomer (2 mg/ml) was incubated in 20 mM Tris-HCl, pH 8.0, 100 mM NaCl for 72 h at 37 degC with shaking at 1000 rpm in an Eppendorf Thermomixer. To determine the concentration of fibrils, the fibril reaction mix was centrifuged at 15,000xg for 15 min to separate fibrils from monomer. The concentration of a-syn monomer in the supernatant was determined in a BCA protein a…		Radioligand Displacement	The prepared fibril mixture was centrifuged at 15,000xg for 15 min to prepare fibrils for binding assays. The supernatant was discarded and the fibril pellet was resuspended in 30 mM Tris-HCl pH 7.4, 0.1% BSA to achieve the desired concentration of fibrils for use in the assay. Competition assays used a fixed concentration of fibrils (1 mM) and [125I]SIL23 (200 nM, consisting of a ratio of 1:400 …	InChI=1S/C14H11FN2O3S/c15-5-6-20-10-2-4-12-14(8-10)21-13-7-9(17(18)19)1-3-11(13)16-12/h1-4,7-8,16H,5-6H2	InChI=1S/C14H11FN2O3S/c15-5-6-20-10-2-4-12-14(8-10)21-13-7-9(17(18)19)1-3-11(13)16-12/h1-4,7-8,16H,5-6H2	306.318	4.1513	78.4141	5	1	64.4	3	4	2	1	0.142857143	21	0	1	2	0	7	0	0	0	0.490828498	0.270212358	0.270212358	-0.490828498	14	6	21	0.666666667	0.285714286	0
SIL26	FCCOC1=CC(SC2=CC([N+]([O-])=O)=CC=C2N3)=C3C=C1	10.1371/journal.pone.0055031			33.5	33.5			-7.474955193	[125I]SIL23	PD	b	Frontal cortex grey matter	Grey matter was isolated from frozen postmortem frontal cortex tissue by dissection with a scalpel. To prepare insoluble fractions, dissected tissue was sequentially homogenized in four buffers (3 mL/g wet weight of tissue) with glass Dounce tissue grinders (Kimble): 1) High salt (HS) buffer: 50 mM Tris-HCl pH 7.5, 750 mM NaCl, 5 mM EDTA; 2) HS buffer with 1% Triton X-100; 3) HS buffer with 1%Tri…		Radioligand Displacement	Competition assays used a fixed concentration of (10 mg/150 ml reaction) and [125I]SIL23 (200 nM, consisting of a ratio of 1:400 hot:cold SIL23) and varying concentration ranges of cold competitor, depending on the ligand. Competitors were diluted in 30 mM Tris-HCl pH 7.4, 0.1% BSA. Reactions were incubated at 37uC for 2 h before quantifying bound radioligand as described above for the saturation…	InChI=1S/C14H11FN2O3S/c15-5-6-20-10-2-4-12-14(8-10)21-13-7-9(17(18)19)1-3-11(13)16-12/h1-4,7-8,16H,5-6H2	InChI=1S/C14H11FN2O3S/c15-5-6-20-10-2-4-12-14(8-10)21-13-7-9(17(18)19)1-3-11(13)16-12/h1-4,7-8,16H,5-6H2	306.318	4.1513	78.4141	5	1	64.4	3	4	2	1	0.142857143	21	0	1	2	0	7	0	0	0	0.490828498	0.270212358	0.270212358	-0.490828498	14	6	21	0.666666667	0.285714286	0
SIL3B	O=[N+](C1=CC=C(N2)C(SC3=C2C=CC=C3)=C1)[O-]	10.1371/journal.pone.0055031			19.9	19.9			-7.701146924	[125I]SIL23	aS	f	Recombinant (E. Coli)	Purified recombinant a-syn monomer (2 mg/ml) was incubated in 20 mM Tris-HCl, pH 8.0, 100 mM NaCl for 72 h at 37 degC with shaking at 1000 rpm in an Eppendorf Thermomixer. To determine the concentration of fibrils, the fibril reaction mix was centrifuged at 15,000xg for 15 min to separate fibrils from monomer. The concentration of a-syn monomer in the supernatant was determined in a BCA protein a…		Radioligand Displacement	The prepared fibril mixture was centrifuged at 15,000xg for 15 min to prepare fibrils for binding assays. The supernatant was discarded and the fibril pellet was resuspended in 30 mM Tris-HCl pH 7.4, 0.1% BSA to achieve the desired concentration of fibrils for use in the assay. Competition assays used a fixed concentration of fibrils (1 mM) and [125I]SIL23 (200 nM, consisting of a ratio of 1:400 …	InChI=1S/C12H8N2O2S/c15-14(16)8-5-6-10-12(7-8)17-11-4-2-1-3-9(11)13-10/h1-7,13H	InChI=1S/C12H8N2O2S/c15-14(16)8-5-6-10-12(7-8)17-11-4-2-1-3-9(11)13-10/h1-7,13H	244.275	3.803	66.9441	4	1	55.17	3	1	2	1	0	17	0	1	2	0	5	0	0	0	0.353670497	0.270212358	0.270212358	-0.353670497	12	5	17	0.705882353	0.294117647	0
SIL3B	O=[N+](C1=CC=C(N2)C(SC3=C2C=CC=C3)=C1)[O-]	10.1371/journal.pone.0055031			49.4	49.4			-7.306273051	[125I]SIL23	PD	b	Frontal cortex grey matter	Grey matter was isolated from frozen postmortem frontal cortex tissue by dissection with a scalpel. To prepare insoluble fractions, dissected tissue was sequentially homogenized in four buffers (3 mL/g wet weight of tissue) with glass Dounce tissue grinders (Kimble): 1) High salt (HS) buffer: 50 mM Tris-HCl pH 7.5, 750 mM NaCl, 5 mM EDTA; 2) HS buffer with 1% Triton X-100; 3) HS buffer with 1%Tri…		Radioligand Displacement	Competition assays used a fixed concentration of (10 mg/150 ml reaction) and [125I]SIL23 (200 nM, consisting of a ratio of 1:400 hot:cold SIL23) and varying concentration ranges of cold competitor, depending on the ligand. Competitors were diluted in 30 mM Tris-HCl pH 7.4, 0.1% BSA. Reactions were incubated at 37uC for 2 h before quantifying bound radioligand as described above for the saturation…	InChI=1S/C12H8N2O2S/c15-14(16)8-5-6-10-12(7-8)17-11-4-2-1-3-9(11)13-10/h1-7,13H	InChI=1S/C12H8N2O2S/c15-14(16)8-5-6-10-12(7-8)17-11-4-2-1-3-9(11)13-10/h1-7,13H	244.275	3.803	66.9441	4	1	55.17	3	1	2	1	0	17	0	1	2	0	5	0	0	0	0.353670497	0.270212358	0.270212358	-0.353670497	12	5	17	0.705882353	0.294117647	0
SIL5	COC1=CC(SC2=CC([N+]([O-])=O)=CC=C2N3)=C3C=C1	10.1371/journal.pone.0055031			66.2	66.2			-7.179142011	[125I]SIL23	aS	f	Recombinant (E. Coli)	Purified recombinant a-syn monomer (2 mg/ml) was incubated in 20 mM Tris-HCl, pH 8.0, 100 mM NaCl for 72 h at 37 degC with shaking at 1000 rpm in an Eppendorf Thermomixer. To determine the concentration of fibrils, the fibril reaction mix was centrifuged at 15,000xg for 15 min to separate fibrils from monomer. The concentration of a-syn monomer in the supernatant was determined in a BCA protein a…		Radioligand Displacement	The prepared fibril mixture was centrifuged at 15,000xg for 15 min to prepare fibrils for binding assays. The supernatant was discarded and the fibril pellet was resuspended in 30 mM Tris-HCl pH 7.4, 0.1% BSA to achieve the desired concentration of fibrils for use in the assay. Competition assays used a fixed concentration of fibrils (1 mM) and [125I]SIL23 (200 nM, consisting of a ratio of 1:400 …	InChI=1S/C13H10N2O3S/c1-18-9-3-5-11-13(7-9)19-12-6-8(15(16)17)2-4-10(12)14-11/h2-7,14H,1H3	InChI=1S/C13H10N2O3S/c1-18-9-3-5-11-13(7-9)19-12-6-8(15(16)17)2-4-10(12)14-11/h2-7,14H,1H3	274.301	3.8116	73.4961	5	1	64.4	3	2	2	1	0.076923077	19	0	1	2	0	6	0	0	0	0.496723278	0.270212358	0.270212358	-0.496723278	13	6	19	0.684210526	0.315789474	0
SIL5	COC1=CC(SC2=CC([N+]([O-])=O)=CC=C2N3)=C3C=C1	10.1371/journal.pone.0055031			83.1	83.1			-7.080398976	[125I]SIL23	PD	b	Frontal cortex grey matter	Grey matter was isolated from frozen postmortem frontal cortex tissue by dissection with a scalpel. To prepare insoluble fractions, dissected tissue was sequentially homogenized in four buffers (3 mL/g wet weight of tissue) with glass Dounce tissue grinders (Kimble): 1) High salt (HS) buffer: 50 mM Tris-HCl pH 7.5, 750 mM NaCl, 5 mM EDTA; 2) HS buffer with 1% Triton X-100; 3) HS buffer with 1%Tri…		Radioligand Displacement	Competition assays used a fixed concentration of (10 mg/150 ml reaction) and [125I]SIL23 (200 nM, consisting of a ratio of 1:400 hot:cold SIL23) and varying concentration ranges of cold competitor, depending on the ligand. Competitors were diluted in 30 mM Tris-HCl pH 7.4, 0.1% BSA. Reactions were incubated at 37uC for 2 h before quantifying bound radioligand as described above for the saturation…	InChI=1S/C13H10N2O3S/c1-18-9-3-5-11-13(7-9)19-12-6-8(15(16)17)2-4-10(12)14-11/h2-7,14H,1H3	InChI=1S/C13H10N2O3S/c1-18-9-3-5-11-13(7-9)19-12-6-8(15(16)17)2-4-10(12)14-11/h2-7,14H,1H3	274.301	3.8116	73.4961	5	1	64.4	3	2	2	1	0.076923077	19	0	1	2	0	6	0	0	0	0.496723278	0.270212358	0.270212358	-0.496723278	13	6	19	0.684210526	0.315789474	0
BF227	FCCOC1=CC=C2C(OC(/C=C/C3=CN=C(N(C)C)S3)=N2)=C1	10.1371/journal.pone.0055031			39.7	39.7			-7.401209493	[125I]SIL23	aS	f	Recombinant (E. Coli)	Purified recombinant a-syn monomer (2 mg/ml) was incubated in 20 mM Tris-HCl, pH 8.0, 100 mM NaCl for 72 h at 37 degC with shaking at 1000 rpm in an Eppendorf Thermomixer. To determine the concentration of fibrils, the fibril reaction mix was centrifuged at 15,000xg for 15 min to separate fibrils from monomer. The concentration of a-syn monomer in the supernatant was determined in a BCA protein a…		Radioligand Displacement	The prepared fibril mixture was centrifuged at 15,000xg for 15 min to prepare fibrils for binding assays. The supernatant was discarded and the fibril pellet was resuspended in 30 mM Tris-HCl pH 7.4, 0.1% BSA to achieve the desired concentration of fibrils for use in the assay. Competition assays used a fixed concentration of fibrils (1 mM) and [125I]SIL23 (200 nM, consisting of a ratio of 1:400 …	InChI=1S/C16H16FN3O2S/c1-20(2)16-18-10-12(23-16)4-6-15-19-13-5-3-11(21-8-7-17)9-14(13)22-15/h3-6,9-10H,7-8H2,1-2H3/b6-4+	InChI=1S/C16H16FN3O2S/c1-20(2)16-18-10-12(23-16)4-6-15-19-13-5-3-11(21-8-7-17)9-14(13)22-15/h3-6,9-10H,7-8H2,1-2H3/b6-4+	333.388	3.869	90.848	6	0	51.39	3	6	3	0	0.25	23	0	0	1	2	7	0	0	0	0.490726795	0.219551048	0.219551048	-0.490726795	16	6	23	0.695652174	0.260869565	0
BF227	FCCOC1=CC=C2C(OC(/C=C/C3=CN=C(N(C)C)S3)=N2)=C1	10.1371/journal.pone.0055031			138	138			-6.860120914	[125I]SIL23	PD	b	Frontal cortex grey matter	Grey matter was isolated from frozen postmortem frontal cortex tissue by dissection with a scalpel. To prepare insoluble fractions, dissected tissue was sequentially homogenized in four buffers (3 mL/g wet weight of tissue) with glass Dounce tissue grinders (Kimble): 1) High salt (HS) buffer: 50 mM Tris-HCl pH 7.5, 750 mM NaCl, 5 mM EDTA; 2) HS buffer with 1% Triton X-100; 3) HS buffer with 1%Tri…		Radioligand Displacement	Competition assays used a fixed concentration of (10 mg/150 ml reaction) and [125I]SIL23 (200 nM, consisting of a ratio of 1:400 hot:cold SIL23) and varying concentration ranges of cold competitor, depending on the ligand. Competitors were diluted in 30 mM Tris-HCl pH 7.4, 0.1% BSA. Reactions were incubated at 37uC for 2 h before quantifying bound radioligand as described above for the saturation…	InChI=1S/C16H16FN3O2S/c1-20(2)16-18-10-12(23-16)4-6-15-19-13-5-3-11(21-8-7-17)9-14(13)22-15/h3-6,9-10H,7-8H2,1-2H3/b6-4+	InChI=1S/C16H16FN3O2S/c1-20(2)16-18-10-12(23-16)4-6-15-19-13-5-3-11(21-8-7-17)9-14(13)22-15/h3-6,9-10H,7-8H2,1-2H3/b6-4+	333.388	3.869	90.848	6	0	51.39	3	6	3	0	0.25	23	0	0	1	2	7	0	0	0	0.490726795	0.219551048	0.219551048	-0.490726795	16	6	23	0.695652174	0.260869565	0
CG	OC(C=C1)=C(C(O)=O)C=C1/N=N/C2=CC=C(C3=CC=C(/N=N/C4=CC(C(O)=O)=C(O)C=C4)C=C3)C=C2	10.1371/journal.pone.0055031			432	432			-6.364516253	[125I]SIL23	aS	f	Recombinant (E. Coli)	Purified recombinant a-syn monomer (2 mg/ml) was incubated in 20 mM Tris-HCl, pH 8.0, 100 mM NaCl for 72 h at 37 degC with shaking at 1000 rpm in an Eppendorf Thermomixer. To determine the concentration of fibrils, the fibril reaction mix was centrifuged at 15,000xg for 15 min to separate fibrils from monomer. The concentration of a-syn monomer in the supernatant was determined in a BCA protein a…		Radioligand Displacement	The prepared fibril mixture was centrifuged at 15,000xg for 15 min to prepare fibrils for binding assays. The supernatant was discarded and the fibril pellet was resuspended in 30 mM Tris-HCl pH 7.4, 0.1% BSA to achieve the desired concentration of fibrils for use in the assay. Competition assays used a fixed concentration of fibrils (1 mM) and [125I]SIL23 (200 nM, consisting of a ratio of 1:400 …	InChI=1S/C26H18N4O6/c31-23-11-9-19(13-21(23)25(33)34)29-27-17-5-1-15(2-6-17)16-3-7-18(8-4-16)28-30-20-10-12-24(32)22(14-20)26(35)36/h1-14,31-32H,(H,33,34)(H,35,36)/b29-27+,30-28+	InChI=1S/C26H18N4O6/c31-23-11-9-19(13-21(23)25(33)34)29-27-17-5-1-15(2-6-17)16-3-7-18(8-4-16)28-30-20-10-12-24(32)22(14-20)26(35)36/h1-14,31-32H,(H,33,34)(H,35,36)/b29-27+,30-28+	482.452	6.992	130.3622	8	4	164.5	4	7	4	0	0	36	0	0	4	0	10	0	0	0	0.507050109	0.33905109	0.33905109	-0.507050109	26	10	36	0.722222222	0.277777778	0
CG	OC(C=C1)=C(C(O)=O)C=C1/N=N/C2=CC=C(C3=CC=C(/N=N/C4=CC(C(O)=O)=C(O)C=C4)C=C3)C=C2	10.1371/journal.pone.0055031			367	367			-6.435333936	[125I]SIL23	PD	b	Frontal cortex grey matter	Grey matter was isolated from frozen postmortem frontal cortex tissue by dissection with a scalpel. To prepare insoluble fractions, dissected tissue was sequentially homogenized in four buffers (3 mL/g wet weight of tissue) with glass Dounce tissue grinders (Kimble): 1) High salt (HS) buffer: 50 mM Tris-HCl pH 7.5, 750 mM NaCl, 5 mM EDTA; 2) HS buffer with 1% Triton X-100; 3) HS buffer with 1%Tri…		Radioligand Displacement	Competition assays used a fixed concentration of (10 mg/150 ml reaction) and [125I]SIL23 (200 nM, consisting of a ratio of 1:400 hot:cold SIL23) and varying concentration ranges of cold competitor, depending on the ligand. Competitors were diluted in 30 mM Tris-HCl pH 7.4, 0.1% BSA. Reactions were incubated at 37uC for 2 h before quantifying bound radioligand as described above for the saturation…	InChI=1S/C26H18N4O6/c31-23-11-9-19(13-21(23)25(33)34)29-27-17-5-1-15(2-6-17)16-3-7-18(8-4-16)28-30-20-10-12-24(32)22(14-20)26(35)36/h1-14,31-32H,(H,33,34)(H,35,36)/b29-27+,30-28+	InChI=1S/C26H18N4O6/c31-23-11-9-19(13-21(23)25(33)34)29-27-17-5-1-15(2-6-17)16-3-7-18(8-4-16)28-30-20-10-12-24(32)22(14-20)26(35)36/h1-14,31-32H,(H,33,34)(H,35,36)/b29-27+,30-28+	482.452	6.992	130.3622	8	4	164.5	4	7	4	0	0	36	0	0	4	0	10	0	0	0	0.507050109	0.33905109	0.33905109	-0.507050109	26	10	36	0.722222222	0.277777778	0
ThT	OC1=CC=C([N+](C)=C(C2=CC=C(N(C)C)C=C2)S3)C3=C1	10.1371/journal.pone.0055031			1040	1040			-5.982966661	[125I]SIL23	aS	f	Recombinant (E. Coli)	Purified recombinant a-syn monomer (2 mg/ml) was incubated in 20 mM Tris-HCl, pH 8.0, 100 mM NaCl for 72 h at 37 degC with shaking at 1000 rpm in an Eppendorf Thermomixer. To determine the concentration of fibrils, the fibril reaction mix was centrifuged at 15,000xg for 15 min to separate fibrils from monomer. The concentration of a-syn monomer in the supernatant was determined in a BCA protein a…		Radioligand Displacement	The prepared fibril mixture was centrifuged at 15,000xg for 15 min to prepare fibrils for binding assays. The supernatant was discarded and the fibril pellet was resuspended in 30 mM Tris-HCl pH 7.4, 0.1% BSA to achieve the desired concentration of fibrils for use in the assay. Competition assays used a fixed concentration of fibrils (1 mM) and [125I]SIL23 (200 nM, consisting of a ratio of 1:400 …	InChI=1S/C16H16N2OS/c1-17(2)12-6-4-11(5-7-12)16-18(3)14-9-8-13(19)10-15(14)20-16/h4-10H,1-3H3/p+1	InChI=1S/C16H16N2OS/c1-17(2)12-6-4-11(5-7-12)16-18(3)14-9-8-13(19)10-15(14)20-16/h4-10H,1-3H3/p+1	285.392	3.1644	84.4288	3	1	27.35	3	2	3	0	0.1875	20	0	0	2	1	4	0	0	0	0.507904719	0.269359896	0.269359896	-0.507904719	16	4	20	0.8	0.2	0
ThT	OC1=CC=C([N+](C)=C(C2=CC=C(N(C)C)C=C2)S3)C3=C1	10.1371/journal.pone.0055031			974	974			-6.011441043	[125I]SIL23	PD	b	Frontal cortex grey matter	Grey matter was isolated from frozen postmortem frontal cortex tissue by dissection with a scalpel. To prepare insoluble fractions, dissected tissue was sequentially homogenized in four buffers (3 mL/g wet weight of tissue) with glass Dounce tissue grinders (Kimble): 1) High salt (HS) buffer: 50 mM Tris-HCl pH 7.5, 750 mM NaCl, 5 mM EDTA; 2) HS buffer with 1% Triton X-100; 3) HS buffer with 1%Tri…		Radioligand Displacement	Competition assays used a fixed concentration of (10 mg/150 ml reaction) and [125I]SIL23 (200 nM, consisting of a ratio of 1:400 hot:cold SIL23) and varying concentration ranges of cold competitor, depending on the ligand. Competitors were diluted in 30 mM Tris-HCl pH 7.4, 0.1% BSA. Reactions were incubated at 37uC for 2 h before quantifying bound radioligand as described above for the saturation…	InChI=1S/C16H16N2OS/c1-17(2)12-6-4-11(5-7-12)16-18(3)14-9-8-13(19)10-15(14)20-16/h4-10H,1-3H3/p+1	InChI=1S/C16H16N2OS/c1-17(2)12-6-4-11(5-7-12)16-18(3)14-9-8-13(19)10-15(14)20-16/h4-10H,1-3H3/p+1	285.392	3.1644	84.4288	3	1	27.35	3	2	3	0	0.1875	20	0	0	2	1	4	0	0	0	0.507904719	0.269359896	0.269359896	-0.507904719	16	4	20	0.8	0.2	0
PiB	OC1=CC=C(N=C(C2=CC=C(NC)C=C2)S3)C3=C1	10.1371/journal.pone.0055031			116	116			-6.935542011	[125I]SIL23	aS	f	Recombinant (E. Coli)	Purified recombinant a-syn monomer (2 mg/ml) was incubated in 20 mM Tris-HCl, pH 8.0, 100 mM NaCl for 72 h at 37 degC with shaking at 1000 rpm in an Eppendorf Thermomixer. To determine the concentration of fibrils, the fibril reaction mix was centrifuged at 15,000xg for 15 min to separate fibrils from monomer. The concentration of a-syn monomer in the supernatant was determined in a BCA protein a…		Radioligand Displacement	The prepared fibril mixture was centrifuged at 15,000xg for 15 min to prepare fibrils for binding assays. The supernatant was discarded and the fibril pellet was resuspended in 30 mM Tris-HCl pH 7.4, 0.1% BSA to achieve the desired concentration of fibrils for use in the assay. Competition assays used a fixed concentration of fibrils (1 mM) and [125I]SIL23 (200 nM, consisting of a ratio of 1:400 …	InChI=1S/C14H12N2OS/c1-15-10-4-2-9(3-5-10)14-16-12-7-6-11(17)8-13(12)18-14/h2-8,15,17H,1H3	InChI=1S/C14H12N2OS/c1-15-10-4-2-9(3-5-10)14-16-12-7-6-11(17)8-13(12)18-14/h2-8,15,17H,1H3	256.33	3.7106	76.2675	4	2	45.15	3	2	3	0	0.071428571	18	0	0	2	1	4	0	0	0	0.507910913	0.124107303	0.124107303	-0.507910913	14	4	18	0.777777778	0.222222222	0
PiB	OC1=CC=C(N=C(C2=CC=C(NC)C=C2)S3)C3=C1	10.1371/journal.pone.0055031			99.2	99.2			-7.003488328	[125I]SIL23	PD	b	Frontal cortex grey matter	Grey matter was isolated from frozen postmortem frontal cortex tissue by dissection with a scalpel. To prepare insoluble fractions, dissected tissue was sequentially homogenized in four buffers (3 mL/g wet weight of tissue) with glass Dounce tissue grinders (Kimble): 1) High salt (HS) buffer: 50 mM Tris-HCl pH 7.5, 750 mM NaCl, 5 mM EDTA; 2) HS buffer with 1% Triton X-100; 3) HS buffer with 1%Tri…		Radioligand Displacement	Competition assays used a fixed concentration of (10 mg/150 ml reaction) and [125I]SIL23 (200 nM, consisting of a ratio of 1:400 hot:cold SIL23) and varying concentration ranges of cold competitor, depending on the ligand. Competitors were diluted in 30 mM Tris-HCl pH 7.4, 0.1% BSA. Reactions were incubated at 37uC for 2 h before quantifying bound radioligand as described above for the saturation…	InChI=1S/C14H12N2OS/c1-15-10-4-2-9(3-5-10)14-16-12-7-6-11(17)8-13(12)18-14/h2-8,15,17H,1H3	InChI=1S/C14H12N2OS/c1-15-10-4-2-9(3-5-10)14-16-12-7-6-11(17)8-13(12)18-14/h2-8,15,17H,1H3	256.33	3.7106	76.2675	4	2	45.15	3	2	3	0	0.071428571	18	0	0	2	1	4	0	0	0	0.507910913	0.124107303	0.124107303	-0.507910913	14	4	18	0.777777778	0.222222222	0
Benzeid1	CN(C)C(C=C1)=CC=C1C2=CC3=NC4=CC=CC=C4N=C3S2	10.1016/j.crci.2011.10.009		77		77		17	-7.113509275		Ab40	f	GeneCust (Dudelange, Luxembourg)	Peptide Ab(1-40) was dissolved in 25 mM sodium hydroxide solution, pH = 12.0 (~4 mg/mL). One volume of this initial solution was diluted with 3 volumes of 10 mM phosphate buffer pH = 7.4, NaCl 100 mM, NaN3 0.02%. The pH was adjusted to 7.4 with concentrated HCl. The peptide concentration was measured by UV–vis spectrometry taking the molar extinction coefficient of tyrosine at 276 nm (e = 1410 /M…		Fluorescence Saturation	Fluorescence intensity changes associated with ligand binding to lysozyme and Ab(1-40) were recorded in a Safas FLX-Xenius fluorimeter (cuvette and plate reader). Dye binding assay were performed at a fixed 6 uM aggregated (or non-aggregated) material (lysozyme or Ab), diluted from the stock solution into 200 mL (plate) or 500 mL (cuvette) of 20 mM phosphate buffer pH = 7.4, 100 mM NaCl. Concentr…	InChI=1S/C18H15N3S/c1-21(2)13-9-7-12(8-10-13)17-11-16-18(22-17)20-15-6-4-3-5-14(15)19-16/h3-11H,1-2H3	InChI=1S/C18H15N3S/c1-21(2)13-9-7-12(8-10-13)17-11-16-18(22-17)20-15-6-4-3-5-14(15)19-16/h3-11H,1-2H3	305.406	4.5775	94.684	4	0	29.02	4	2	4	0	0.111111111	22	0	0	2	2	4	0	0	0	0.377660899	0.142673869	0.142673869	-0.377660899	18	4	22	0.818181818	0.181818182	0
Benzeid2	O=C1NC2=CC=CC=C2N=C1/C=C/C3=CC=C(N(C)C)C=C3	10.1016/j.crci.2011.10.009		294		294		90	-6.53165267		Ab40	f	GeneCust (Dudelange, Luxembourg)	Peptide Ab(1-40) was dissolved in 25 mM sodium hydroxide solution, pH = 12.0 (~4 mg/mL). One volume of this initial solution was diluted with 3 volumes of 10 mM phosphate buffer pH = 7.4, NaCl 100 mM, NaN3 0.02%. The pH was adjusted to 7.4 with concentrated HCl. The peptide concentration was measured by UV–vis spectrometry taking the molar extinction coefficient of tyrosine at 276 nm (e = 1410 /M…		Fluorescence Saturation	Fluorescence intensity changes associated with ligand binding to lysozyme and Ab(1-40) were recorded in a Safas FLX-Xenius fluorimeter (cuvette and plate reader). Dye binding assay were performed at a fixed 6 uM aggregated (or non-aggregated) material (lysozyme or Ab), diluted from the stock solution into 200 mL (plate) or 500 mL (cuvette) of 20 mM phosphate buffer pH = 7.4, 100 mM NaCl. Concentr…	InChI=1S/C18H17N3O/c1-21(2)14-10-7-13(8-11-14)9-12-17-18(22)20-16-6-4-3-5-15(16)19-17/h3-12H,1-2H3,(H,20,22)/b12-9+	InChI=1S/C18H17N3O/c1-21(2)14-10-7-13(8-11-14)9-12-17-18(22)20-16-6-4-3-5-15(16)19-17/h3-12H,1-2H3,(H,20,22)/b12-9+	291.354	3.1595	92.0607	3	1	48.99	3	3	3	0	0.111111111	22	0	0	2	1	4	0	0	0	0.37766091	0.273837709	0.273837709	-0.37766091	18	4	22	0.818181818	0.181818182	0
ThT	OC1=CC=C([N+](C)=C(C2=CC=C(N(C)C)C=C2)S3)C3=C1	10.1016/j.crci.2011.10.009		925		925		30	-6.033858267		Ab40	f	GeneCust (Dudelange, Luxembourg)	Peptide Ab(1-40) was dissolved in 25 mM sodium hydroxide solution, pH = 12.0 (~4 mg/mL). One volume of this initial solution was diluted with 3 volumes of 10 mM phosphate buffer pH = 7.4, NaCl 100 mM, NaN3 0.02%. The pH was adjusted to 7.4 with concentrated HCl. The peptide concentration was measured by UV–vis spectrometry taking the molar extinction coefficient of tyrosine at 276 nm (e = 1410 /M…		Fluorescence Saturation	Fluorescence intensity changes associated with ligand binding to lysozyme and Ab(1-40) were recorded in a Safas FLX-Xenius fluorimeter (cuvette and plate reader). Dye binding assay were performed at a fixed 6 uM aggregated (or non-aggregated) material (lysozyme or Ab), diluted from the stock solution into 200 mL (plate) or 500 mL (cuvette) of 20 mM phosphate buffer pH = 7.4, 100 mM NaCl. Concentr…	InChI=1S/C16H16N2OS/c1-17(2)12-6-4-11(5-7-12)16-18(3)14-9-8-13(19)10-15(14)20-16/h4-10H,1-3H3/p+1	InChI=1S/C16H16N2OS/c1-17(2)12-6-4-11(5-7-12)16-18(3)14-9-8-13(19)10-15(14)20-16/h4-10H,1-3H3/p+1	285.392	3.1644	84.4288	3	1	27.35	3	2	3	0	0.1875	20	0	0	2	1	4	0	0	0	0.507904719	0.269359896	0.269359896	-0.507904719	16	4	20	0.8	0.2	0
K114	OC1=CC=C(/C=C/C2=CC=C(/C=C/C3=CC=C(O)C=C3)C(Br)=C2)C=C1	10.1016/j.crci.2011.10.009		20		20			-7.698970004		Ab40	f	GeneCust (Dudelange, Luxembourg)	Peptide Ab(1-40) was dissolved in 25 mM sodium hydroxide solution, pH = 12.0 (~4 mg/mL). One volume of this initial solution was diluted with 3 volumes of 10 mM phosphate buffer pH = 7.4, NaCl 100 mM, NaN3 0.02%. The pH was adjusted to 7.4 with concentrated HCl. The peptide concentration was measured by UV–vis spectrometry taking the molar extinction coefficient of tyrosine at 276 nm (e = 1410 /M…		Fluorescence Saturation	Fluorescence intensity changes associated with ligand binding to lysozyme and Ab(1-40) were recorded in a Safas FLX-Xenius fluorimeter (cuvette and plate reader). Dye binding assay were performed at a fixed 6 uM aggregated (or non-aggregated) material (lysozyme or Ab), diluted from the stock solution into 200 mL (plate) or 500 mL (cuvette) of 20 mM phosphate buffer pH = 7.4, 100 mM NaCl. Concentr…	InChI=1S/C22H17BrO2/c23-22-15-18(2-1-16-5-11-20(24)12-6-16)4-10-19(22)9-3-17-7-13-21(25)14-8-17/h1-15,24-25H/b2-1+,9-3+	InChI=1S/C22H17BrO2/c23-22-15-18(2-1-16-5-11-20(24)12-6-16)4-10-19(22)9-3-17-7-13-21(25)14-8-17/h1-15,24-25H/b2-1+,9-3+	393.28	6.2011	108.2116	2	2	40.46	3	4	3	0	0	25	0	0	3	0	3	0	0	0	0.507966251	0.115117697	0.115117697	-0.507966251	22	2	25	0.88	0.08	0
ThT	CN(C)C(C=C1)=CC=C1C2=[N+](C)C3=CC=C(O)C=C3S2	10.1016/j.ejmech.2021.113887		14360		14360		1540	-4.84284556		aS	f	Recombinant (E. Coli)	Purified recombinant human a-syn monomer at 5 mg/ml in phosphate buffer saline (PBS) was incubated at 37 degC for 7 days with constant agitation (1000 rpm) in a ThermoMixer shaker (Eppendorf). The sedimentation assay and ThT fluorescence assay were performed to confirm the presence of amyloid aggregates. Then the a-syn aggregates were sonicated with 1s-on/1s-off interval for 30 cycles at 20% ampl…		Fluorescence Saturation	First, spectral characters of ThT were determined using Synergy H1 Hybrid Reader. Solution of ThT in PBS buffer (6 mM, with 0.1% DMSO) and prepared a-syn aggregates in PBS buffer were added into 384 well plates. The mixture was incubated at room temperature with mechanical agitation for 1 h. The excitation wavelength was scanned with the range from 300 to 460 nm to determine the maximum excitatio…	InChI=1S/C16H16N2OS/c1-17(2)12-6-4-11(5-7-12)16-18(3)14-9-8-13(19)10-15(14)20-16/h4-10H,1-3H3/p+1	InChI=1S/C16H16N2OS/c1-17(2)12-6-4-11(5-7-12)16-18(3)14-9-8-13(19)10-15(14)20-16/h4-10H,1-3H3/p+1	285.392	3.1644	84.4288	3	1	27.35	3	2	3	0	0.1875	20	0	0	2	1	4	0	0	0	0.507904719	0.269359896	0.269359896	-0.507904719	16	4	20	0.8	0.2	0
ThT	CN(C)C(C=C1)=CC=C1C2=[N+](C)C3=CC=C(O)C=C3S2	10.1016/j.ejmech.2021.113887		15200		15200		2040	-4.818156412		aS	f	Recombinant (E. Coli)	Purified recombinant human a-syn monomer at 5 mg/ml in phosphate buffer saline (PBS) was incubated at 37 degC for 7 days with constant agitation (1000 rpm) in a ThermoMixer shaker (Eppendorf). The sedimentation assay and ThT fluorescence assay were performed to confirm the presence of amyloid aggregates. Then the a-syn aggregates were sonicated with 1s-on/1s-off interval for 30 cycles at 20% ampl…		SPR	All the SPR binding evaluation studies were performed on Biacore T200 (GE Healthcare, Sweden) using CMD 500 sensor chip (Xantec, Germany). Briefly, prepared human recombinant a-syn aggregates in NaAc Buffer (pH = 4.0) were immobilized on CMD 500 sensor chip, with a total coupling amount over 10,000 RU. Various concentrations of test compounds (range from 20 nM to 100 mM) were injected into Biacor…	InChI=1S/C16H16N2OS/c1-17(2)12-6-4-11(5-7-12)16-18(3)14-9-8-13(19)10-15(14)20-16/h4-10H,1-3H3/p+1	InChI=1S/C16H16N2OS/c1-17(2)12-6-4-11(5-7-12)16-18(3)14-9-8-13(19)10-15(14)20-16/h4-10H,1-3H3/p+1	285.392	3.1644	84.4288	3	1	27.35	3	2	3	0	0.1875	20	0	0	2	1	4	0	0	0	0.507904719	0.269359896	0.269359896	-0.507904719	16	4	20	0.8	0.2	0
SIL5	COC1=CC(SC2=CC([N+]([O-])=O)=CC=C2N3)=C3C=C1	10.1016/j.ejmech.2021.113887		60		60		10	-7.22184875		aS	f	Recombinant (E. Coli)	Purified recombinant human a-syn monomer at 5 mg/ml in phosphate buffer saline (PBS) was incubated at 37 degC for 7 days with constant agitation (1000 rpm) in a ThermoMixer shaker (Eppendorf). The sedimentation assay and ThT fluorescence assay were performed to confirm the presence of amyloid aggregates. Then the a-syn aggregates were sonicated with 1s-on/1s-off interval for 30 cycles at 20% ampl…		SPR	All the SPR binding evaluation studies were performed on Biacore T200 (GE Healthcare, Sweden) using CMD 500 sensor chip (Xantec, Germany). Briefly, prepared human recombinant a-syn aggregates in NaAc Buffer (pH = 4.0) were immobilized on CMD 500 sensor chip, with a total coupling amount over 10,000 RU. Various concentrations of test compounds (range from 20 nM to 100 mM) were injected into Biacor…	InChI=1S/C13H10N2O3S/c1-18-9-3-5-11-13(7-9)19-12-6-8(15(16)17)2-4-10(12)14-11/h2-7,14H,1H3	InChI=1S/C13H10N2O3S/c1-18-9-3-5-11-13(7-9)19-12-6-8(15(16)17)2-4-10(12)14-11/h2-7,14H,1H3	274.301	3.8116	73.4961	5	1	64.4	3	2	2	1	0.076923077	19	0	1	2	0	6	0	0	0	0.496723278	0.270212358	0.270212358	-0.496723278	13	6	19	0.684210526	0.315789474	0
Bian2021-6	O=S(NC1=CC=CC=C1/C=C/C2=CC=CC=C2)(C3=CC=CC=C3)=O	10.1016/j.ejmech.2021.113887		4880		4880		320	-5.311580178		aS	f	Recombinant (E. Coli)	Purified recombinant human a-syn monomer at 5 mg/ml in phosphate buffer saline (PBS) was incubated at 37 degC for 7 days with constant agitation (1000 rpm) in a ThermoMixer shaker (Eppendorf). The sedimentation assay and ThT fluorescence assay were performed to confirm the presence of amyloid aggregates. Then the a-syn aggregates were sonicated with 1s-on/1s-off interval for 30 cycles at 20% ampl…		SPR	All the SPR binding evaluation studies were performed on Biacore T200 (GE Healthcare, Sweden) using CMD 500 sensor chip (Xantec, Germany). Briefly, prepared human recombinant a-syn aggregates in NaAc Buffer (pH = 4.0) were immobilized on CMD 500 sensor chip, with a total coupling amount over 10,000 RU. Various concentrations of test compounds (range from 20 nM to 100 mM) were injected into Biacor…	InChI=1S/C20H17NO2S/c22-24(23,19-12-5-2-6-13-19)21-20-14-8-7-11-18(20)16-15-17-9-3-1-4-10-17/h1-16,21H/b16-15+	InChI=1S/C20H17NO2S/c22-24(23,19-12-5-2-6-13-19)21-20-14-8-7-11-18(20)16-15-17-9-3-1-4-10-17/h1-16,21H/b16-15+	335.428	4.6578	99.0625	2	1	46.17	3	5	3	0	0	24	0	0	3	0	4	0	0	0	0.279023732	0.261408755	0.261408755	-0.279023732	20	4	24	0.833333333	0.166666667	0
Bian2021-7-1	O=C(C1=CC=CC=C1)NC2=CC(/C=C/C3=CC=C(OC)C=C3)=CC=C2	10.1016/j.ejmech.2021.113887		180		180		40	-6.744727495		aS	f	Recombinant (E. Coli)	Purified recombinant human a-syn monomer at 5 mg/ml in phosphate buffer saline (PBS) was incubated at 37 degC for 7 days with constant agitation (1000 rpm) in a ThermoMixer shaker (Eppendorf). The sedimentation assay and ThT fluorescence assay were performed to confirm the presence of amyloid aggregates. Then the a-syn aggregates were sonicated with 1s-on/1s-off interval for 30 cycles at 20% ampl…		SPR	All the SPR binding evaluation studies were performed on Biacore T200 (GE Healthcare, Sweden) using CMD 500 sensor chip (Xantec, Germany). Briefly, prepared human recombinant a-syn aggregates in NaAc Buffer (pH = 4.0) were immobilized on CMD 500 sensor chip, with a total coupling amount over 10,000 RU. Various concentrations of test compounds (range from 20 nM to 100 mM) were injected into Biacor…	InChI=1S/C22H19NO2/c1-25-21-14-12-17(13-15-21)10-11-18-6-5-9-20(16-18)23-22(24)19-7-3-2-4-8-19/h2-16H,1H3,(H,23,24)/b11-10+	InChI=1S/C22H19NO2/c1-25-21-14-12-17(13-15-21)10-11-18-6-5-9-20(16-18)23-22(24)19-7-3-2-4-8-19/h2-16H,1H3,(H,23,24)/b11-10+	329.399	5.1179	102.7592	2	1	38.33	3	5	3	0	0.045454545	25	0	0	3	0	3	0	0	0	0.496767824	0.255157951	0.255157951	-0.496767824	22	3	25	0.88	0.12	0
Bian2021-7-2	O=C(C1=CC=CC=C1)NC2=CC(/C=C/C3=CC=C(F)C=C3)=CC=C2	10.1016/j.ejmech.2021.113887		490		490		80	-6.30980392		aS	f	Recombinant (E. Coli)	Purified recombinant human a-syn monomer at 5 mg/ml in phosphate buffer saline (PBS) was incubated at 37 degC for 7 days with constant agitation (1000 rpm) in a ThermoMixer shaker (Eppendorf). The sedimentation assay and ThT fluorescence assay were performed to confirm the presence of amyloid aggregates. Then the a-syn aggregates were sonicated with 1s-on/1s-off interval for 30 cycles at 20% ampl…		SPR	All the SPR binding evaluation studies were performed on Biacore T200 (GE Healthcare, Sweden) using CMD 500 sensor chip (Xantec, Germany). Briefly, prepared human recombinant a-syn aggregates in NaAc Buffer (pH = 4.0) were immobilized on CMD 500 sensor chip, with a total coupling amount over 10,000 RU. Various concentrations of test compounds (range from 20 nM to 100 mM) were injected into Biacor…	InChI=1S/C21H16FNO/c22-19-13-11-16(12-14-19)9-10-17-5-4-8-20(15-17)23-21(24)18-6-2-1-3-7-18/h1-15H,(H,23,24)/b10-9+	InChI=1S/C21H16FNO/c22-19-13-11-16(12-14-19)9-10-17-5-4-8-20(15-17)23-21(24)18-6-2-1-3-7-18/h1-15H,(H,23,24)/b10-9+	317.363	5.2484	96.1652	1	1	29.1	3	4	3	0	0	24	0	0	3	0	3	0	0	0	0.32197677	0.255157951	0.255157951	-0.32197677	21	2	24	0.875	0.083333333	0
Bian2021-7-3	O=C(C1=CC=CC=C1)NC2=CC=C(/C=C/C3=CC=C(OC)C=C3)C=C2	10.1016/j.ejmech.2021.113887		>10000		>10000					aS	f	Recombinant (E. Coli)	Purified recombinant human a-syn monomer at 5 mg/ml in phosphate buffer saline (PBS) was incubated at 37 degC for 7 days with constant agitation (1000 rpm) in a ThermoMixer shaker (Eppendorf). The sedimentation assay and ThT fluorescence assay were performed to confirm the presence of amyloid aggregates. Then the a-syn aggregates were sonicated with 1s-on/1s-off interval for 30 cycles at 20% ampl…		SPR	All the SPR binding evaluation studies were performed on Biacore T200 (GE Healthcare, Sweden) using CMD 500 sensor chip (Xantec, Germany). Briefly, prepared human recombinant a-syn aggregates in NaAc Buffer (pH = 4.0) were immobilized on CMD 500 sensor chip, with a total coupling amount over 10,000 RU. Various concentrations of test compounds (range from 20 nM to 100 mM) were injected into Biacor…	InChI=1S/C22H19NO2/c1-25-21-15-11-18(12-16-21)8-7-17-9-13-20(14-10-17)23-22(24)19-5-3-2-4-6-19/h2-16H,1H3,(H,23,24)/b8-7+	InChI=1S/C22H19NO2/c1-25-21-15-11-18(12-16-21)8-7-17-9-13-20(14-10-17)23-22(24)19-5-3-2-4-6-19/h2-16H,1H3,(H,23,24)/b8-7+	329.399	5.1179	102.7592	2	1	38.33	3	5	3	0	0.045454545	25	0	0	3	0	3	0	0	0	0.496767824	0.255157627	0.255157627	-0.496767824	22	3	25	0.88	0.12	0
Bian2021-7-4	O=C(C1=CC=CC=C1)NC2=CC=C(/C=C/C3=CC=C(F)C=C3)C=C2	10.1016/j.ejmech.2021.113887		>10000		>10000					aS	f	Recombinant (E. Coli)	Purified recombinant human a-syn monomer at 5 mg/ml in phosphate buffer saline (PBS) was incubated at 37 degC for 7 days with constant agitation (1000 rpm) in a ThermoMixer shaker (Eppendorf). The sedimentation assay and ThT fluorescence assay were performed to confirm the presence of amyloid aggregates. Then the a-syn aggregates were sonicated with 1s-on/1s-off interval for 30 cycles at 20% ampl…		SPR	All the SPR binding evaluation studies were performed on Biacore T200 (GE Healthcare, Sweden) using CMD 500 sensor chip (Xantec, Germany). Briefly, prepared human recombinant a-syn aggregates in NaAc Buffer (pH = 4.0) were immobilized on CMD 500 sensor chip, with a total coupling amount over 10,000 RU. Various concentrations of test compounds (range from 20 nM to 100 mM) were injected into Biacor…	InChI=1S/C21H16FNO/c22-19-12-8-16(9-13-19)6-7-17-10-14-20(15-11-17)23-21(24)18-4-2-1-3-5-18/h1-15H,(H,23,24)/b7-6+	InChI=1S/C21H16FNO/c22-19-12-8-16(9-13-19)6-7-17-10-14-20(15-11-17)23-21(24)18-4-2-1-3-5-18/h1-15H,(H,23,24)/b7-6+	317.363	5.2484	96.1652	1	1	29.1	3	4	3	0	0	24	0	0	3	0	3	0	0	0	0.321998031	0.255157627	0.255157627	-0.321998031	21	2	24	0.875	0.083333333	0
Bian2021-7-5	O=C(C1=CC=CC=C1)NC2=CC=CC=C2/C=C/C3=CC=C(OC)C=C3	10.1016/j.ejmech.2021.113887		40		40		10	-7.397940009		aS	f	Recombinant (E. Coli)	Purified recombinant human a-syn monomer at 5 mg/ml in phosphate buffer saline (PBS) was incubated at 37 degC for 7 days with constant agitation (1000 rpm) in a ThermoMixer shaker (Eppendorf). The sedimentation assay and ThT fluorescence assay were performed to confirm the presence of amyloid aggregates. Then the a-syn aggregates were sonicated with 1s-on/1s-off interval for 30 cycles at 20% ampl…		SPR	All the SPR binding evaluation studies were performed on Biacore T200 (GE Healthcare, Sweden) using CMD 500 sensor chip (Xantec, Germany). Briefly, prepared human recombinant a-syn aggregates in NaAc Buffer (pH = 4.0) were immobilized on CMD 500 sensor chip, with a total coupling amount over 10,000 RU. Various concentrations of test compounds (range from 20 nM to 100 mM) were injected into Biacor…	InChI=1S/C22H19NO2/c1-25-20-15-12-17(13-16-20)11-14-18-7-5-6-10-21(18)23-22(24)19-8-3-2-4-9-19/h2-16H,1H3,(H,23,24)/b14-11+	InChI=1S/C22H19NO2/c1-25-20-15-12-17(13-16-20)11-14-18-7-5-6-10-21(18)23-22(24)19-8-3-2-4-9-19/h2-16H,1H3,(H,23,24)/b14-11+	329.399	5.1179	102.7592	2	1	38.33	3	5	3	0	0.045454545	25	0	0	3	0	3	0	0	0	0.496767824	0.255174829	0.255174829	-0.496767824	22	3	25	0.88	0.12	0
Bian2021-7-6	O=C(C1=CC=CC=C1)NC2=CC=CC=C2/C=C/C3=CC=C(F)C=C3	10.1016/j.ejmech.2021.113887		400		400		130	-6.397940009		aS	f	Recombinant (E. Coli)	Purified recombinant human a-syn monomer at 5 mg/ml in phosphate buffer saline (PBS) was incubated at 37 degC for 7 days with constant agitation (1000 rpm) in a ThermoMixer shaker (Eppendorf). The sedimentation assay and ThT fluorescence assay were performed to confirm the presence of amyloid aggregates. Then the a-syn aggregates were sonicated with 1s-on/1s-off interval for 30 cycles at 20% ampl…		SPR	All the SPR binding evaluation studies were performed on Biacore T200 (GE Healthcare, Sweden) using CMD 500 sensor chip (Xantec, Germany). Briefly, prepared human recombinant a-syn aggregates in NaAc Buffer (pH = 4.0) were immobilized on CMD 500 sensor chip, with a total coupling amount over 10,000 RU. Various concentrations of test compounds (range from 20 nM to 100 mM) were injected into Biacor…	InChI=1S/C21H16FNO/c22-19-14-11-16(12-15-19)10-13-17-6-4-5-9-20(17)23-21(24)18-7-2-1-3-8-18/h1-15H,(H,23,24)/b13-10+	InChI=1S/C21H16FNO/c22-19-14-11-16(12-15-19)10-13-17-6-4-5-9-20(17)23-21(24)18-7-2-1-3-8-18/h1-15H,(H,23,24)/b13-10+	317.363	5.2484	96.1652	1	1	29.1	3	4	3	0	0	24	0	0	3	0	3	0	0	0	0.321435619	0.255174829	0.255174829	-0.321435619	21	2	24	0.875	0.083333333	0
Bian2021-7-7	FC(C=C1)=CC=C1/C=C/C2=CC=CC=C2NC(C3=CC=CN=N3)=O	10.1016/j.ejmech.2021.113887		>10000		>10000					aS	f	Recombinant (E. Coli)	Purified recombinant human a-syn monomer at 5 mg/ml in phosphate buffer saline (PBS) was incubated at 37 degC for 7 days with constant agitation (1000 rpm) in a ThermoMixer shaker (Eppendorf). The sedimentation assay and ThT fluorescence assay were performed to confirm the presence of amyloid aggregates. Then the a-syn aggregates were sonicated with 1s-on/1s-off interval for 30 cycles at 20% ampl…		SPR	All the SPR binding evaluation studies were performed on Biacore T200 (GE Healthcare, Sweden) using CMD 500 sensor chip (Xantec, Germany). Briefly, prepared human recombinant a-syn aggregates in NaAc Buffer (pH = 4.0) were immobilized on CMD 500 sensor chip, with a total coupling amount over 10,000 RU. Various concentrations of test compounds (range from 20 nM to 100 mM) were injected into Biacor…	InChI=1S/C19H14FN3O/c20-16-11-8-14(9-12-16)7-10-15-4-1-2-5-17(15)22-19(24)18-6-3-13-21-23-18/h1-13H,(H,22,24)/b10-7+	InChI=1S/C19H14FN3O/c20-16-11-8-14(9-12-16)7-10-15-4-1-2-5-17(15)22-19(24)18-6-3-13-21-23-18/h1-13H,(H,22,24)/b10-7+	319.339	4.0384	91.7552	3	1	54.88	3	4	3	0	0	24	0	0	2	1	5	0	0	0	0.320036243	0.275692384	0.275692384	-0.320036243	19	4	24	0.791666667	0.166666667	0
Bian2021-7-8	CN(C)C(C=C1)=CC=C1/C=C/C2=CC=CC=C2NC(C3=CC=CN=N3)=O	10.1016/j.ejmech.2021.113887		140		140		20	-6.853871964		aS	f	Recombinant (E. Coli)	Purified recombinant human a-syn monomer at 5 mg/ml in phosphate buffer saline (PBS) was incubated at 37 degC for 7 days with constant agitation (1000 rpm) in a ThermoMixer shaker (Eppendorf). The sedimentation assay and ThT fluorescence assay were performed to confirm the presence of amyloid aggregates. Then the a-syn aggregates were sonicated with 1s-on/1s-off interval for 30 cycles at 20% ampl…		SPR	All the SPR binding evaluation studies were performed on Biacore T200 (GE Healthcare, Sweden) using CMD 500 sensor chip (Xantec, Germany). Briefly, prepared human recombinant a-syn aggregates in NaAc Buffer (pH = 4.0) were immobilized on CMD 500 sensor chip, with a total coupling amount over 10,000 RU. Various concentrations of test compounds (range from 20 nM to 100 mM) were injected into Biacor…	InChI=1S/C21H20N4O/c1-25(2)18-13-10-16(11-14-18)9-12-17-6-3-4-7-19(17)23-21(26)20-8-5-15-22-24-20/h3-15H,1-2H3,(H,23,26)/b12-9+	InChI=1S/C21H20N4O/c1-25(2)18-13-10-16(11-14-18)9-12-17-6-3-4-7-19(17)23-21(26)20-8-5-15-22-24-20/h3-15H,1-2H3,(H,23,26)/b12-9+	344.418	3.9653	106.1242	4	1	58.12	3	5	3	0	0.095238095	26	0	0	2	1	5	0	0	0	0.37766091	0.275692384	0.275692384	-0.37766091	21	5	26	0.807692308	0.192307692	0
Bian2021-7-9	O=C(C1=CC=CN=N1)NC2=CC=CC=C2/C=C/C3=CC=C([N+]([O-])=O)C=C3	10.1016/j.ejmech.2021.113887		>10000		>10000					aS	f	Recombinant (E. Coli)	Purified recombinant human a-syn monomer at 5 mg/ml in phosphate buffer saline (PBS) was incubated at 37 degC for 7 days with constant agitation (1000 rpm) in a ThermoMixer shaker (Eppendorf). The sedimentation assay and ThT fluorescence assay were performed to confirm the presence of amyloid aggregates. Then the a-syn aggregates were sonicated with 1s-on/1s-off interval for 30 cycles at 20% ampl…		SPR	All the SPR binding evaluation studies were performed on Biacore T200 (GE Healthcare, Sweden) using CMD 500 sensor chip (Xantec, Germany). Briefly, prepared human recombinant a-syn aggregates in NaAc Buffer (pH = 4.0) were immobilized on CMD 500 sensor chip, with a total coupling amount over 10,000 RU. Various concentrations of test compounds (range from 20 nM to 100 mM) were injected into Biacor…	InChI=1S/C19H14N4O3/c24-19(18-6-3-13-20-22-18)21-17-5-2-1-4-15(17)10-7-14-8-11-16(12-9-14)23(25)26/h1-13H,(H,21,24)/b10-7+	InChI=1S/C19H14N4O3/c24-19(18-6-3-13-20-22-18)21-17-5-2-1-4-15(17)10-7-14-8-11-16(12-9-14)23(25)26/h1-13H,(H,21,24)/b10-7+	346.346	3.8075	98.4516	5	1	98.02	3	5	3	0	0	26	0	0	2	1	7	0	0	0	0.320036243	0.275692384	0.275692384	-0.320036243	19	7	26	0.730769231	0.269230769	0
Bian2021-7-10	O=C(C1=CC=CN=N1)NC2=CC=CC=C2/C=C/C3=CC=C(OC)C=C3	10.1016/j.ejmech.2021.113887		>10000		>10000					aS	f	Recombinant (E. Coli)	Purified recombinant human a-syn monomer at 5 mg/ml in phosphate buffer saline (PBS) was incubated at 37 degC for 7 days with constant agitation (1000 rpm) in a ThermoMixer shaker (Eppendorf). The sedimentation assay and ThT fluorescence assay were performed to confirm the presence of amyloid aggregates. Then the a-syn aggregates were sonicated with 1s-on/1s-off interval for 30 cycles at 20% ampl…		SPR	All the SPR binding evaluation studies were performed on Biacore T200 (GE Healthcare, Sweden) using CMD 500 sensor chip (Xantec, Germany). Briefly, prepared human recombinant a-syn aggregates in NaAc Buffer (pH = 4.0) were immobilized on CMD 500 sensor chip, with a total coupling amount over 10,000 RU. Various concentrations of test compounds (range from 20 nM to 100 mM) were injected into Biacor…	InChI=1S/C20H17N3O2/c1-25-17-12-9-15(10-13-17)8-11-16-5-2-3-6-18(16)22-20(24)19-7-4-14-21-23-19/h2-14H,1H3,(H,22,24)/b11-8+	InChI=1S/C20H17N3O2/c1-25-17-12-9-15(10-13-17)8-11-16-5-2-3-6-18(16)22-20(24)19-7-4-14-21-23-19/h2-14H,1H3,(H,22,24)/b11-8+	331.375	3.9079	98.3492	4	1	64.11	3	5	3	0	0.05	25	0	0	2	1	5	0	0	0	0.496767824	0.275692384	0.275692384	-0.496767824	20	5	25	0.8	0.2	0
Bian2021-7-11	FC(C=C1)=CC=C1/C=C/C2=CC=CC=C2NC(C3=CC=CC=N3)=O	10.1016/j.ejmech.2021.113887		2740		2740		160	-5.562249437		aS	f	Recombinant (E. Coli)	Purified recombinant human a-syn monomer at 5 mg/ml in phosphate buffer saline (PBS) was incubated at 37 degC for 7 days with constant agitation (1000 rpm) in a ThermoMixer shaker (Eppendorf). The sedimentation assay and ThT fluorescence assay were performed to confirm the presence of amyloid aggregates. Then the a-syn aggregates were sonicated with 1s-on/1s-off interval for 30 cycles at 20% ampl…		SPR	All the SPR binding evaluation studies were performed on Biacore T200 (GE Healthcare, Sweden) using CMD 500 sensor chip (Xantec, Germany). Briefly, prepared human recombinant a-syn aggregates in NaAc Buffer (pH = 4.0) were immobilized on CMD 500 sensor chip, with a total coupling amount over 10,000 RU. Various concentrations of test compounds (range from 20 nM to 100 mM) were injected into Biacor…	InChI=1S/C20H15FN2O/c21-17-12-9-15(10-13-17)8-11-16-5-1-2-6-18(16)23-20(24)19-7-3-4-14-22-19/h1-14H,(H,23,24)/b11-8+	InChI=1S/C20H15FN2O/c21-17-12-9-15(10-13-17)8-11-16-5-1-2-6-18(16)23-20(24)19-7-3-4-14-22-19/h1-14H,(H,23,24)/b11-8+	318.351	4.6434	93.9602	2	1	41.99	3	4	3	0	0	24	0	0	2	1	4	0	0	0	0.320095897	0.273765397	0.273765397	-0.320095897	20	3	24	0.833333333	0.125	0
Bian2021-7-12	FC(C=C1)=CC=C1/C=C/C2=CC=CC=C2NC(C3=CC=NN3)=O	10.1016/j.ejmech.2021.113887		1830		1830		400	-5.73754891		aS	f	Recombinant (E. Coli)	Purified recombinant human a-syn monomer at 5 mg/ml in phosphate buffer saline (PBS) was incubated at 37 degC for 7 days with constant agitation (1000 rpm) in a ThermoMixer shaker (Eppendorf). The sedimentation assay and ThT fluorescence assay were performed to confirm the presence of amyloid aggregates. Then the a-syn aggregates were sonicated with 1s-on/1s-off interval for 30 cycles at 20% ampl…		SPR	All the SPR binding evaluation studies were performed on Biacore T200 (GE Healthcare, Sweden) using CMD 500 sensor chip (Xantec, Germany). Briefly, prepared human recombinant a-syn aggregates in NaAc Buffer (pH = 4.0) were immobilized on CMD 500 sensor chip, with a total coupling amount over 10,000 RU. Various concentrations of test compounds (range from 20 nM to 100 mM) were injected into Biacor…	InChI=1S/C18H14FN3O/c19-15-9-6-13(7-10-15)5-8-14-3-1-2-4-16(14)21-18(23)17-11-12-20-22-17/h1-12H,(H,20,22)(H,21,23)/b8-5+	InChI=1S/C18H14FN3O/c19-15-9-6-13(7-10-15)5-8-14-3-1-2-4-16(14)21-18(23)17-11-12-20-22-17/h1-12H,(H,20,22)(H,21,23)/b8-5+	307.328	3.9715	88.3109	2	2	57.78	3	4	3	0	0	23	0	0	2	1	5	0	0	0	0.320115967	0.27317985	0.27317985	-0.320115967	18	4	23	0.782608696	0.173913043	0
Bian2021-7-13	O=C(C1=CC=CC=C1)NC2=CC=CC=C2/C=C/C3=CC=C(N(C)C)C=C3	10.1016/j.ejmech.2021.113887		150		150		20	-6.823908741		aS	f	Recombinant (E. Coli)	Purified recombinant human a-syn monomer at 5 mg/ml in phosphate buffer saline (PBS) was incubated at 37 degC for 7 days with constant agitation (1000 rpm) in a ThermoMixer shaker (Eppendorf). The sedimentation assay and ThT fluorescence assay were performed to confirm the presence of amyloid aggregates. Then the a-syn aggregates were sonicated with 1s-on/1s-off interval for 30 cycles at 20% ampl…		SPR	All the SPR binding evaluation studies were performed on Biacore T200 (GE Healthcare, Sweden) using CMD 500 sensor chip (Xantec, Germany). Briefly, prepared human recombinant a-syn aggregates in NaAc Buffer (pH = 4.0) were immobilized on CMD 500 sensor chip, with a total coupling amount over 10,000 RU. Various concentrations of test compounds (range from 20 nM to 100 mM) were injected into Biacor…	InChI=1S/C23H22N2O/c1-25(2)21-16-13-18(14-17-21)12-15-19-8-6-7-11-22(19)24-23(26)20-9-4-3-5-10-20/h3-17H,1-2H3,(H,24,26)/b15-12+	InChI=1S/C23H22N2O/c1-25(2)21-16-13-18(14-17-21)12-15-19-8-6-7-11-22(19)24-23(26)20-9-4-3-5-10-20/h3-17H,1-2H3,(H,24,26)/b15-12+	342.442	5.1753	110.5342	2	1	32.34	3	5	3	0	0.086956522	26	0	0	3	0	3	0	0	0	0.37766091	0.255174829	0.255174829	-0.37766091	23	3	26	0.884615385	0.115384615	0
Bian2021-7-14	O=C(C1=CC=CC=N1)NC2=CC=CC=C2/C=C/C3=CC=C(N(C)C)C=C3	10.1016/j.ejmech.2021.113887		100		100		10	-7		aS	f	Recombinant (E. Coli)	Purified recombinant human a-syn monomer at 5 mg/ml in phosphate buffer saline (PBS) was incubated at 37 degC for 7 days with constant agitation (1000 rpm) in a ThermoMixer shaker (Eppendorf). The sedimentation assay and ThT fluorescence assay were performed to confirm the presence of amyloid aggregates. Then the a-syn aggregates were sonicated with 1s-on/1s-off interval for 30 cycles at 20% ampl…		SPR	All the SPR binding evaluation studies were performed on Biacore T200 (GE Healthcare, Sweden) using CMD 500 sensor chip (Xantec, Germany). Briefly, prepared human recombinant a-syn aggregates in NaAc Buffer (pH = 4.0) were immobilized on CMD 500 sensor chip, with a total coupling amount over 10,000 RU. Various concentrations of test compounds (range from 20 nM to 100 mM) were injected into Biacor…	InChI=1S/C22H21N3O/c1-25(2)19-14-11-17(12-15-19)10-13-18-7-3-4-8-20(18)24-22(26)21-9-5-6-16-23-21/h3-16H,1-2H3,(H,24,26)/b13-10+	InChI=1S/C22H21N3O/c1-25(2)19-14-11-17(12-15-19)10-13-18-7-3-4-8-20(18)24-22(26)21-9-5-6-16-23-21/h3-16H,1-2H3,(H,24,26)/b13-10+	343.43	4.5703	108.3292	3	1	45.23	3	5	3	0	0.090909091	26	0	0	2	1	4	0	0	0	0.37766091	0.273765397	0.273765397	-0.37766091	22	4	26	0.846153846	0.153846154	0
Bian2021-7-15	O=C(C1=CC=CC=C1)NC2=CC=CC=C2/C=C/C3=CC=C([N+]([O-])=O)C=C3	10.1016/j.ejmech.2021.113887		140		140		40	-6.853871964		aS	f	Recombinant (E. Coli)	Purified recombinant human a-syn monomer at 5 mg/ml in phosphate buffer saline (PBS) was incubated at 37 degC for 7 days with constant agitation (1000 rpm) in a ThermoMixer shaker (Eppendorf). The sedimentation assay and ThT fluorescence assay were performed to confirm the presence of amyloid aggregates. Then the a-syn aggregates were sonicated with 1s-on/1s-off interval for 30 cycles at 20% ampl…		SPR	All the SPR binding evaluation studies were performed on Biacore T200 (GE Healthcare, Sweden) using CMD 500 sensor chip (Xantec, Germany). Briefly, prepared human recombinant a-syn aggregates in NaAc Buffer (pH = 4.0) were immobilized on CMD 500 sensor chip, with a total coupling amount over 10,000 RU. Various concentrations of test compounds (range from 20 nM to 100 mM) were injected into Biacor…	InChI=1S/C21H16N2O3/c24-21(18-7-2-1-3-8-18)22-20-9-5-4-6-17(20)13-10-16-11-14-19(15-12-16)23(25)26/h1-15H,(H,22,24)/b13-10+	InChI=1S/C21H16N2O3/c24-21(18-7-2-1-3-8-18)22-20-9-5-4-6-17(20)13-10-16-11-14-19(15-12-16)23(25)26/h1-15H,(H,22,24)/b13-10+	344.37	5.0175	102.8616	3	1	72.24	3	5	3	0	0	26	0	0	3	0	5	0	0	0	0.321435619	0.268964854	0.268964854	-0.321435619	21	5	26	0.807692308	0.192307692	0
Bian2021-7-16	O=C(C1=CC=CC=N1)NC2=CC=CC=C2/C=C/C3=CC=C([N+]([O-])=O)C=C3	10.1016/j.ejmech.2021.113887		10		10		10	-8		aS	f	Recombinant (E. Coli)	Purified recombinant human a-syn monomer at 5 mg/ml in phosphate buffer saline (PBS) was incubated at 37 degC for 7 days with constant agitation (1000 rpm) in a ThermoMixer shaker (Eppendorf). The sedimentation assay and ThT fluorescence assay were performed to confirm the presence of amyloid aggregates. Then the a-syn aggregates were sonicated with 1s-on/1s-off interval for 30 cycles at 20% ampl…		SPR	All the SPR binding evaluation studies were performed on Biacore T200 (GE Healthcare, Sweden) using CMD 500 sensor chip (Xantec, Germany). Briefly, prepared human recombinant a-syn aggregates in NaAc Buffer (pH = 4.0) were immobilized on CMD 500 sensor chip, with a total coupling amount over 10,000 RU. Various concentrations of test compounds (range from 20 nM to 100 mM) were injected into Biacor…	InChI=1S/C20H15N3O3/c24-20(19-7-3-4-14-21-19)22-18-6-2-1-5-16(18)11-8-15-9-12-17(13-10-15)23(25)26/h1-14H,(H,22,24)/b11-8+	InChI=1S/C20H15N3O3/c24-20(19-7-3-4-14-21-19)22-18-6-2-1-5-16(18)11-8-15-9-12-17(13-10-15)23(25)26/h1-14H,(H,22,24)/b11-8+	345.358	4.4125	100.6566	4	1	85.13	3	5	3	0	0	26	0	0	2	1	6	0	0	0	0.320095897	0.273765397	0.273765397	-0.320095897	20	6	26	0.769230769	0.230769231	0
Bian2021-7-17	O=C(C1=CC=NN1)NC2=CC=CC=C2/C=C/C3=CC=C([N+]([O-])=O)C=C3	10.1016/j.ejmech.2021.113887		1130		1130		80	-5.946921557		aS	f	Recombinant (E. Coli)	Purified recombinant human a-syn monomer at 5 mg/ml in phosphate buffer saline (PBS) was incubated at 37 degC for 7 days with constant agitation (1000 rpm) in a ThermoMixer shaker (Eppendorf). The sedimentation assay and ThT fluorescence assay were performed to confirm the presence of amyloid aggregates. Then the a-syn aggregates were sonicated with 1s-on/1s-off interval for 30 cycles at 20% ampl…		SPR	All the SPR binding evaluation studies were performed on Biacore T200 (GE Healthcare, Sweden) using CMD 500 sensor chip (Xantec, Germany). Briefly, prepared human recombinant a-syn aggregates in NaAc Buffer (pH = 4.0) were immobilized on CMD 500 sensor chip, with a total coupling amount over 10,000 RU. Various concentrations of test compounds (range from 20 nM to 100 mM) were injected into Biacor…	InChI=1S/C18H14N4O3/c23-18(17-11-12-19-21-17)20-16-4-2-1-3-14(16)8-5-13-6-9-15(10-7-13)22(24)25/h1-12H,(H,19,21)(H,20,23)/b8-5+	InChI=1S/C18H14N4O3/c23-18(17-11-12-19-21-17)20-16-4-2-1-3-14(16)8-5-13-6-9-15(10-7-13)22(24)25/h1-12H,(H,19,21)(H,20,23)/b8-5+	334.335	3.7406	95.0073	4	2	100.92	3	5	3	0	0	25	0	0	2	1	7	0	0	0	0.320115967	0.27317985	0.27317985	-0.320115967	18	7	25	0.72	0.28	0
Bian2021-7-18	O=C(C1=CC=CC=C1)NC2=CC=CC=C2/C=C/C3=CC=CC([N+]([O-])=O)=C3	10.1016/j.ejmech.2021.113887		380		380		50	-6.420216403		aS	f	Recombinant (E. Coli)	Purified recombinant human a-syn monomer at 5 mg/ml in phosphate buffer saline (PBS) was incubated at 37 degC for 7 days with constant agitation (1000 rpm) in a ThermoMixer shaker (Eppendorf). The sedimentation assay and ThT fluorescence assay were performed to confirm the presence of amyloid aggregates. Then the a-syn aggregates were sonicated with 1s-on/1s-off interval for 30 cycles at 20% ampl…		SPR	All the SPR binding evaluation studies were performed on Biacore T200 (GE Healthcare, Sweden) using CMD 500 sensor chip (Xantec, Germany). Briefly, prepared human recombinant a-syn aggregates in NaAc Buffer (pH = 4.0) were immobilized on CMD 500 sensor chip, with a total coupling amount over 10,000 RU. Various concentrations of test compounds (range from 20 nM to 100 mM) were injected into Biacor…	InChI=1S/C21H16N2O3/c24-21(18-9-2-1-3-10-18)22-20-12-5-4-8-17(20)14-13-16-7-6-11-19(15-16)23(25)26/h1-15H,(H,22,24)/b14-13+	InChI=1S/C21H16N2O3/c24-21(18-9-2-1-3-10-18)22-20-12-5-4-8-17(20)14-13-16-7-6-11-19(15-16)23(25)26/h1-15H,(H,22,24)/b14-13+	344.37	5.0175	102.8616	3	1	72.24	3	5	3	0	0	26	0	0	3	0	5	0	0	0	0.321435619	0.269522211	0.269522211	-0.321435619	21	5	26	0.807692308	0.192307692	0
Bian2021-7-19	O=C(C1=CC=CC=N1)NC2=CC=CC=C2/C=C/C3=CC=CC([N+]([O-])=O)=C3	10.1016/j.ejmech.2021.113887		3580		3580		10	-5.446116973		aS	f	Recombinant (E. Coli)	Purified recombinant human a-syn monomer at 5 mg/ml in phosphate buffer saline (PBS) was incubated at 37 degC for 7 days with constant agitation (1000 rpm) in a ThermoMixer shaker (Eppendorf). The sedimentation assay and ThT fluorescence assay were performed to confirm the presence of amyloid aggregates. Then the a-syn aggregates were sonicated with 1s-on/1s-off interval for 30 cycles at 20% ampl…		SPR	All the SPR binding evaluation studies were performed on Biacore T200 (GE Healthcare, Sweden) using CMD 500 sensor chip (Xantec, Germany). Briefly, prepared human recombinant a-syn aggregates in NaAc Buffer (pH = 4.0) were immobilized on CMD 500 sensor chip, with a total coupling amount over 10,000 RU. Various concentrations of test compounds (range from 20 nM to 100 mM) were injected into Biacor…	InChI=1S/C20H15N3O3/c24-20(19-10-3-4-13-21-19)22-18-9-2-1-7-16(18)12-11-15-6-5-8-17(14-15)23(25)26/h1-14H,(H,22,24)/b12-11+	InChI=1S/C20H15N3O3/c24-20(19-10-3-4-13-21-19)22-18-9-2-1-7-16(18)12-11-15-6-5-8-17(14-15)23(25)26/h1-14H,(H,22,24)/b12-11+	345.358	4.4125	100.6566	4	1	85.13	3	5	3	0	0	26	0	0	2	1	6	0	0	0	0.320095897	0.273765397	0.273765397	-0.320095897	20	6	26	0.769230769	0.230769231	0
Bian2021-7-20	O=C(C1=CC=CC=N1)NC2=CC=CC=C2/C=C/C3=CC=C(OC)C=C3	10.1016/j.ejmech.2021.113887		70		70		30	-7.15490196		aS	f	Recombinant (E. Coli)	Purified recombinant human a-syn monomer at 5 mg/ml in phosphate buffer saline (PBS) was incubated at 37 degC for 7 days with constant agitation (1000 rpm) in a ThermoMixer shaker (Eppendorf). The sedimentation assay and ThT fluorescence assay were performed to confirm the presence of amyloid aggregates. Then the a-syn aggregates were sonicated with 1s-on/1s-off interval for 30 cycles at 20% ampl…		SPR	All the SPR binding evaluation studies were performed on Biacore T200 (GE Healthcare, Sweden) using CMD 500 sensor chip (Xantec, Germany). Briefly, prepared human recombinant a-syn aggregates in NaAc Buffer (pH = 4.0) were immobilized on CMD 500 sensor chip, with a total coupling amount over 10,000 RU. Various concentrations of test compounds (range from 20 nM to 100 mM) were injected into Biacor…	InChI=1S/C21H18N2O2/c1-25-18-13-10-16(11-14-18)9-12-17-6-2-3-7-19(17)23-21(24)20-8-4-5-15-22-20/h2-15H,1H3,(H,23,24)/b12-9+	InChI=1S/C21H18N2O2/c1-25-18-13-10-16(11-14-18)9-12-17-6-2-3-7-19(17)23-21(24)20-8-4-5-15-22-20/h2-15H,1H3,(H,23,24)/b12-9+	330.387	4.5129	100.5542	3	1	51.22	3	5	3	0	0.047619048	25	0	0	2	1	4	0	0	0	0.496767824	0.273765397	0.273765397	-0.496767824	21	4	25	0.84	0.16	0
Bian2021-7-21	O=C(C1=CC=CN=C1)NC2=CC=CC=C2/C=C/C3=CC=C(OC)C=C3	10.1016/j.ejmech.2021.113887		>10000		>10000					aS	f	Recombinant (E. Coli)	Purified recombinant human a-syn monomer at 5 mg/ml in phosphate buffer saline (PBS) was incubated at 37 degC for 7 days with constant agitation (1000 rpm) in a ThermoMixer shaker (Eppendorf). The sedimentation assay and ThT fluorescence assay were performed to confirm the presence of amyloid aggregates. Then the a-syn aggregates were sonicated with 1s-on/1s-off interval for 30 cycles at 20% ampl…		SPR	All the SPR binding evaluation studies were performed on Biacore T200 (GE Healthcare, Sweden) using CMD 500 sensor chip (Xantec, Germany). Briefly, prepared human recombinant a-syn aggregates in NaAc Buffer (pH = 4.0) were immobilized on CMD 500 sensor chip, with a total coupling amount over 10,000 RU. Various concentrations of test compounds (range from 20 nM to 100 mM) were injected into Biacor…	InChI=1S/C21H18N2O2/c1-25-19-12-9-16(10-13-19)8-11-17-5-2-3-7-20(17)23-21(24)18-6-4-14-22-15-18/h2-15H,1H3,(H,23,24)/b11-8+	InChI=1S/C21H18N2O2/c1-25-19-12-9-16(10-13-19)8-11-17-5-2-3-7-20(17)23-21(24)18-6-4-14-22-15-18/h2-15H,1H3,(H,23,24)/b11-8+	330.387	4.5129	100.5542	3	1	51.22	3	5	3	0	0.047619048	25	0	0	2	1	4	0	0	0	0.496767824	0.25674146	0.25674146	-0.496767824	21	4	25	0.84	0.16	0
Bian2021-7-22	O=C(C1=CC=NC=C1)NC2=CC=CC=C2/C=C/C3=CC=C(OC)C=C3	10.1016/j.ejmech.2021.113887		420		420		110	-6.37675071		aS	f	Recombinant (E. Coli)	Purified recombinant human a-syn monomer at 5 mg/ml in phosphate buffer saline (PBS) was incubated at 37 degC for 7 days with constant agitation (1000 rpm) in a ThermoMixer shaker (Eppendorf). The sedimentation assay and ThT fluorescence assay were performed to confirm the presence of amyloid aggregates. Then the a-syn aggregates were sonicated with 1s-on/1s-off interval for 30 cycles at 20% ampl…		SPR	All the SPR binding evaluation studies were performed on Biacore T200 (GE Healthcare, Sweden) using CMD 500 sensor chip (Xantec, Germany). Briefly, prepared human recombinant a-syn aggregates in NaAc Buffer (pH = 4.0) were immobilized on CMD 500 sensor chip, with a total coupling amount over 10,000 RU. Various concentrations of test compounds (range from 20 nM to 100 mM) were injected into Biacor…	InChI=1S/C21H18N2O2/c1-25-19-10-7-16(8-11-19)6-9-17-4-2-3-5-20(17)23-21(24)18-12-14-22-15-13-18/h2-15H,1H3,(H,23,24)/b9-6+	InChI=1S/C21H18N2O2/c1-25-19-10-7-16(8-11-19)6-9-17-4-2-3-5-20(17)23-21(24)18-12-14-22-15-13-18/h2-15H,1H3,(H,23,24)/b9-6+	330.387	4.5129	100.5542	3	1	51.22	3	5	3	0	0.047619048	25	0	0	2	1	4	0	0	0	0.496767824	0.255288014	0.255288014	-0.496767824	21	4	25	0.84	0.16	0
Bian2021-7-23	O=C(C1=CC=NN1)NC2=CC=CC=C2/C=C/C3=CC=C(OC)C=C3	10.1016/j.ejmech.2021.113887		320		320		50	-6.494850022		aS	f	Recombinant (E. Coli)	Purified recombinant human a-syn monomer at 5 mg/ml in phosphate buffer saline (PBS) was incubated at 37 degC for 7 days with constant agitation (1000 rpm) in a ThermoMixer shaker (Eppendorf). The sedimentation assay and ThT fluorescence assay were performed to confirm the presence of amyloid aggregates. Then the a-syn aggregates were sonicated with 1s-on/1s-off interval for 30 cycles at 20% ampl…		SPR	All the SPR binding evaluation studies were performed on Biacore T200 (GE Healthcare, Sweden) using CMD 500 sensor chip (Xantec, Germany). Briefly, prepared human recombinant a-syn aggregates in NaAc Buffer (pH = 4.0) were immobilized on CMD 500 sensor chip, with a total coupling amount over 10,000 RU. Various concentrations of test compounds (range from 20 nM to 100 mM) were injected into Biacor…	InChI=1S/C19H17N3O2/c1-24-16-10-7-14(8-11-16)6-9-15-4-2-3-5-17(15)21-19(23)18-12-13-20-22-18/h2-13H,1H3,(H,20,22)(H,21,23)/b9-6+	InChI=1S/C19H17N3O2/c1-24-16-10-7-14(8-11-16)6-9-15-4-2-3-5-17(15)21-19(23)18-12-13-20-22-18/h2-13H,1H3,(H,20,22)(H,21,23)/b9-6+	319.364	3.841	94.9049	3	2	67.01	3	5	3	0	0.052631579	24	0	0	2	1	5	0	0	0	0.496767824	0.27317985	0.27317985	-0.496767824	19	5	24	0.791666667	0.208333333	0
Bian2021-7-24	O=C(C1=CC=C([N+]([O-])=O)C=C1)NC2=CC=CC=C2/C=C/C3=CC=C(OC)C=C3	10.1016/j.ejmech.2021.113887		6660		6660		280	-5.176525771		aS	f	Recombinant (E. Coli)	Purified recombinant human a-syn monomer at 5 mg/ml in phosphate buffer saline (PBS) was incubated at 37 degC for 7 days with constant agitation (1000 rpm) in a ThermoMixer shaker (Eppendorf). The sedimentation assay and ThT fluorescence assay were performed to confirm the presence of amyloid aggregates. Then the a-syn aggregates were sonicated with 1s-on/1s-off interval for 30 cycles at 20% ampl…		SPR	All the SPR binding evaluation studies were performed on Biacore T200 (GE Healthcare, Sweden) using CMD 500 sensor chip (Xantec, Germany). Briefly, prepared human recombinant a-syn aggregates in NaAc Buffer (pH = 4.0) were immobilized on CMD 500 sensor chip, with a total coupling amount over 10,000 RU. Various concentrations of test compounds (range from 20 nM to 100 mM) were injected into Biacor…	InChI=1S/C22H18N2O4/c1-28-20-14-7-16(8-15-20)6-9-17-4-2-3-5-21(17)23-22(25)18-10-12-19(13-11-18)24(26)27/h2-15H,1H3,(H,23,25)/b9-6+	InChI=1S/C22H18N2O4/c1-28-20-14-7-16(8-15-20)6-9-17-4-2-3-5-21(17)23-22(25)18-10-12-19(13-11-18)24(26)27/h2-15H,1H3,(H,23,25)/b9-6+	374.396	5.0261	109.4136	4	1	81.47	3	6	3	0	0.045454545	28	0	0	3	0	6	0	0	0	0.496767824	0.268971538	0.268971538	-0.496767824	22	6	28	0.785714286	0.214285714	0
Bian2021-7-25	O=C(CC1=CC=CC=C1)NC2=CC=CC=C2/C=C/C3=CC=C(OC)C=C3	10.1016/j.ejmech.2021.113887		250		250		60	-6.602059991		aS	f	Recombinant (E. Coli)	Purified recombinant human a-syn monomer at 5 mg/ml in phosphate buffer saline (PBS) was incubated at 37 degC for 7 days with constant agitation (1000 rpm) in a ThermoMixer shaker (Eppendorf). The sedimentation assay and ThT fluorescence assay were performed to confirm the presence of amyloid aggregates. Then the a-syn aggregates were sonicated with 1s-on/1s-off interval for 30 cycles at 20% ampl…		SPR	All the SPR binding evaluation studies were performed on Biacore T200 (GE Healthcare, Sweden) using CMD 500 sensor chip (Xantec, Germany). Briefly, prepared human recombinant a-syn aggregates in NaAc Buffer (pH = 4.0) were immobilized on CMD 500 sensor chip, with a total coupling amount over 10,000 RU. Various concentrations of test compounds (range from 20 nM to 100 mM) were injected into Biacor…	InChI=1S/C23H21NO2/c1-26-21-15-12-18(13-16-21)11-14-20-9-5-6-10-22(20)24-23(25)17-19-7-3-2-4-8-19/h2-16H,17H2,1H3,(H,24,25)/b14-11+	InChI=1S/C23H21NO2/c1-26-21-15-12-18(13-16-21)11-14-20-9-5-6-10-22(20)24-23(25)17-19-7-3-2-4-8-19/h2-16H,17H2,1H3,(H,24,25)/b14-11+	343.426	5.0468	107.1397	2	1	38.33	3	6	3	0	0.086956522	26	0	0	3	0	3	0	0	0	0.496767824	0.228310855	0.228310855	-0.496767824	23	3	26	0.884615385	0.115384615	0
Bian2021-7-26	O=C(C1=CC=CS1)NC2=CC=CC=C2/C=C/C3=CC=C(OC)C=C3	10.1016/j.ejmech.2021.113887		>10000		>10000					aS	f	Recombinant (E. Coli)	Purified recombinant human a-syn monomer at 5 mg/ml in phosphate buffer saline (PBS) was incubated at 37 degC for 7 days with constant agitation (1000 rpm) in a ThermoMixer shaker (Eppendorf). The sedimentation assay and ThT fluorescence assay were performed to confirm the presence of amyloid aggregates. Then the a-syn aggregates were sonicated with 1s-on/1s-off interval for 30 cycles at 20% ampl…		SPR	All the SPR binding evaluation studies were performed on Biacore T200 (GE Healthcare, Sweden) using CMD 500 sensor chip (Xantec, Germany). Briefly, prepared human recombinant a-syn aggregates in NaAc Buffer (pH = 4.0) were immobilized on CMD 500 sensor chip, with a total coupling amount over 10,000 RU. Various concentrations of test compounds (range from 20 nM to 100 mM) were injected into Biacor…	InChI=1S/C20H17NO2S/c1-23-17-12-9-15(10-13-17)8-11-16-5-2-3-6-18(16)21-20(22)19-7-4-14-24-19/h2-14H,1H3,(H,21,22)/b11-8+	InChI=1S/C20H17NO2S/c1-23-17-12-9-15(10-13-17)8-11-16-5-2-3-6-18(16)21-20(22)19-7-4-14-24-19/h2-14H,1H3,(H,21,22)/b11-8+	335.428	5.1794	100.6362	3	1	38.33	3	5	3	0	0.05	24	0	0	2	1	4	0	0	0	0.496767824	0.265240168	0.265240168	-0.496767824	20	4	24	0.833333333	0.166666667	0
Bian2021-7-27	O=C(C1=NC=CS1)NC2=CC=CC=C2/C=C/C3=CC=C(OC)C=C3	10.1016/j.ejmech.2021.113887		700		700		140	-6.15490196		aS	f	Recombinant (E. Coli)	Purified recombinant human a-syn monomer at 5 mg/ml in phosphate buffer saline (PBS) was incubated at 37 degC for 7 days with constant agitation (1000 rpm) in a ThermoMixer shaker (Eppendorf). The sedimentation assay and ThT fluorescence assay were performed to confirm the presence of amyloid aggregates. Then the a-syn aggregates were sonicated with 1s-on/1s-off interval for 30 cycles at 20% ampl…		SPR	All the SPR binding evaluation studies were performed on Biacore T200 (GE Healthcare, Sweden) using CMD 500 sensor chip (Xantec, Germany). Briefly, prepared human recombinant a-syn aggregates in NaAc Buffer (pH = 4.0) were immobilized on CMD 500 sensor chip, with a total coupling amount over 10,000 RU. Various concentrations of test compounds (range from 20 nM to 100 mM) were injected into Biacor…	InChI=1S/C19H16N2O2S/c1-23-16-10-7-14(8-11-16)6-9-15-4-2-3-5-17(15)21-18(22)19-20-12-13-24-19/h2-13H,1H3,(H,21,22)/b9-6+	InChI=1S/C19H16N2O2S/c1-23-16-10-7-14(8-11-16)6-9-15-4-2-3-5-17(15)21-18(22)19-20-12-13-24-19/h2-13H,1H3,(H,21,22)/b9-6+	336.416	4.5744	98.4312	4	1	51.22	3	5	3	0	0.052631579	24	0	0	2	1	5	0	0	0	0.496767824	0.284149181	0.284149181	-0.496767824	19	5	24	0.791666667	0.208333333	0
Bian2021-9-1	O=C(NCC1=NC=CN=C1)NC2=CC=CC=C2/C=C/C3=CC=C(OC)C=C3	10.1016/j.ejmech.2021.113887		>10000		>10000					aS	f	Recombinant (E. Coli)	Purified recombinant human a-syn monomer at 5 mg/ml in phosphate buffer saline (PBS) was incubated at 37 degC for 7 days with constant agitation (1000 rpm) in a ThermoMixer shaker (Eppendorf). The sedimentation assay and ThT fluorescence assay were performed to confirm the presence of amyloid aggregates. Then the a-syn aggregates were sonicated with 1s-on/1s-off interval for 30 cycles at 20% ampl…		SPR	All the SPR binding evaluation studies were performed on Biacore T200 (GE Healthcare, Sweden) using CMD 500 sensor chip (Xantec, Germany). Briefly, prepared human recombinant a-syn aggregates in NaAc Buffer (pH = 4.0) were immobilized on CMD 500 sensor chip, with a total coupling amount over 10,000 RU. Various concentrations of test compounds (range from 20 nM to 100 mM) were injected into Biacor…	InChI=1S/C21H20N4O2/c1-27-19-10-7-16(8-11-19)6-9-17-4-2-3-5-20(17)25-21(26)24-15-18-14-22-12-13-23-18/h2-14H,15H2,1H3,(H2,24,25,26)/b9-6+	InChI=1S/C21H20N4O2/c1-27-19-10-7-16(8-11-19)6-9-17-4-2-3-5-20(17)25-21(26)24-15-18-14-22-12-13-23-18/h2-14H,15H2,1H3,(H2,24,25,26)/b9-6+	360.417	3.9773	106.2544	4	2	76.14	3	6	3	0	0.095238095	27	0	0	2	1	6	0	0	0	0.496767824	0.319076809	0.319076809	-0.496767824	21	6	27	0.777777778	0.222222222	0
Bian2021-9-2	O=C(NCC1=CC=CC=C1)NC2=CC=CC=C2/C=C/C3=CC=C(OC)C=C3	10.1016/j.ejmech.2021.113887		640		640		140	-6.193820026		aS	f	Recombinant (E. Coli)	Purified recombinant human a-syn monomer at 5 mg/ml in phosphate buffer saline (PBS) was incubated at 37 degC for 7 days with constant agitation (1000 rpm) in a ThermoMixer shaker (Eppendorf). The sedimentation assay and ThT fluorescence assay were performed to confirm the presence of amyloid aggregates. Then the a-syn aggregates were sonicated with 1s-on/1s-off interval for 30 cycles at 20% ampl…		SPR	All the SPR binding evaluation studies were performed on Biacore T200 (GE Healthcare, Sweden) using CMD 500 sensor chip (Xantec, Germany). Briefly, prepared human recombinant a-syn aggregates in NaAc Buffer (pH = 4.0) were immobilized on CMD 500 sensor chip, with a total coupling amount over 10,000 RU. Various concentrations of test compounds (range from 20 nM to 100 mM) were injected into Biacor…	InChI=1S/C23H22N2O2/c1-27-21-15-12-18(13-16-21)11-14-20-9-5-6-10-22(20)25-23(26)24-17-19-7-3-2-4-8-19/h2-16H,17H2,1H3,(H2,24,25,26)/b14-11+	InChI=1S/C23H22N2O2/c1-27-21-15-12-18(13-16-21)11-14-20-9-5-6-10-22(20)25-23(26)24-17-19-7-3-2-4-8-19/h2-16H,17H2,1H3,(H2,24,25,26)/b14-11+	358.441	5.1873	110.6644	2	2	50.36	3	6	3	0	0.086956522	27	0	0	3	0	4	0	0	0	0.496767824	0.3190227	0.3190227	-0.496767824	23	4	27	0.851851852	0.148148148	0
Bian2021-9-3	O=C(NC1=CC=CC=C1)NC2=CC=CC=C2/C=C/C3=CC=C(OC)C=C3	10.1016/j.ejmech.2021.113887		4050		4050		30	-5.392544977		aS	f	Recombinant (E. Coli)	Purified recombinant human a-syn monomer at 5 mg/ml in phosphate buffer saline (PBS) was incubated at 37 degC for 7 days with constant agitation (1000 rpm) in a ThermoMixer shaker (Eppendorf). The sedimentation assay and ThT fluorescence assay were performed to confirm the presence of amyloid aggregates. Then the a-syn aggregates were sonicated with 1s-on/1s-off interval for 30 cycles at 20% ampl…		SPR	All the SPR binding evaluation studies were performed on Biacore T200 (GE Healthcare, Sweden) using CMD 500 sensor chip (Xantec, Germany). Briefly, prepared human recombinant a-syn aggregates in NaAc Buffer (pH = 4.0) were immobilized on CMD 500 sensor chip, with a total coupling amount over 10,000 RU. Various concentrations of test compounds (range from 20 nM to 100 mM) were injected into Biacor…	InChI=1S/C22H20N2O2/c1-26-20-15-12-17(13-16-20)11-14-18-7-5-6-10-21(18)24-22(25)23-19-8-3-2-4-9-19/h2-16H,1H3,(H2,23,24,25)/b14-11+	InChI=1S/C22H20N2O2/c1-26-20-15-12-17(13-16-20)11-14-18-7-5-6-10-21(18)24-22(25)23-19-8-3-2-4-9-19/h2-16H,1H3,(H2,23,24,25)/b14-11+	344.414	5.5096	107.4474	2	2	50.36	3	5	3	0	0.045454545	26	0	0	3	0	4	0	0	0	0.496767824	0.323198548	0.323198548	-0.496767824	22	4	26	0.846153846	0.153846154	0
Blass2014a-01	COc1cc(/C=c2\sc3nc(-c4ccncc4)cn3c2=O)cc(OC)c1O	10.1021/ml500147n					5			ThR	t	f	Not specified	Not specified		Fluorescence Displacement	Not specified	InChI=1S/C19H15N3O4S/c1-25-14-7-11(8-15(26-2)17(14)23)9-16-18(24)22-10-13(21-19(22)27-16)12-3-5-20-6-4-12/h3-10,23H,1-2H3/b16-9-	InChI=1S/C19H15N3O4S/c1-25-14-7-11(8-15(26-2)17(14)23)9-16-18(24)22-10-13(21-19(22)27-16)12-3-5-20-6-4-12/h3-10,23H,1-2H3/b16-9-	381.413	2.0885	102.5658	8	1	85.95	4	4	4	0	0.105263158	27	0	0	1	3	8	0	0	0	0.50169921	0.273952123	0.273952123	-0.50169921	19	8	27	0.703703704	0.296296296	0
Blass2014a-01	COc1cc(/C=c2\sc3nc(-c4ccncc4)cn3c2=O)cc(OC)c1O	10.1021/ml500147n					93			ThR	Ab	f	Not specified	Not specified		Fluorescence Displacement	Not specified	InChI=1S/C19H15N3O4S/c1-25-14-7-11(8-15(26-2)17(14)23)9-16-18(24)22-10-13(21-19(22)27-16)12-3-5-20-6-4-12/h3-10,23H,1-2H3/b16-9-	InChI=1S/C19H15N3O4S/c1-25-14-7-11(8-15(26-2)17(14)23)9-16-18(24)22-10-13(21-19(22)27-16)12-3-5-20-6-4-12/h3-10,23H,1-2H3/b16-9-	381.413	2.0885	102.5658	8	1	85.95	4	4	4	0	0.105263158	27	0	0	1	3	8	0	0	0	0.50169921	0.273952123	0.273952123	-0.50169921	19	8	27	0.703703704	0.296296296	0
Blass2014a-02	COc1cc(/C=c2\sc3nc(-c4ccc(Cl)cc4)cn3c2=O)cc(OC)c1O	10.1021/ml500147n					2			ThR	t	f	Not specified	Not specified		Fluorescence Displacement	Not specified	InChI=1S/C20H15ClN2O4S/c1-26-15-7-11(8-16(27-2)18(15)24)9-17-19(25)23-10-14(22-20(23)28-17)12-3-5-13(21)6-4-12/h3-10,24H,1-2H3/b17-9-	InChI=1S/C20H15ClN2O4S/c1-26-15-7-11(8-16(27-2)18(15)24)9-17-19(25)23-10-14(22-20(23)28-17)12-3-5-13(21)6-4-12/h3-10,24H,1-2H3/b17-9-	414.87	3.3469	109.7808	7	1	73.06	4	4	4	0	0.1	28	0	0	2	2	8	0	0	0	0.50169921	0.273952123	0.273952123	-0.50169921	20	7	28	0.714285714	0.25	0
Blass2014a-02	COc1cc(/C=c2\sc3nc(-c4ccc(Cl)cc4)cn3c2=O)cc(OC)c1O	10.1021/ml500147n					7			ThR	Ab	f	Not specified	Not specified		Fluorescence Displacement	Not specified	InChI=1S/C20H15ClN2O4S/c1-26-15-7-11(8-16(27-2)18(15)24)9-17-19(25)23-10-14(22-20(23)28-17)12-3-5-13(21)6-4-12/h3-10,24H,1-2H3/b17-9-	InChI=1S/C20H15ClN2O4S/c1-26-15-7-11(8-16(27-2)18(15)24)9-17-19(25)23-10-14(22-20(23)28-17)12-3-5-13(21)6-4-12/h3-10,24H,1-2H3/b17-9-	414.87	3.3469	109.7808	7	1	73.06	4	4	4	0	0.1	28	0	0	2	2	8	0	0	0	0.50169921	0.273952123	0.273952123	-0.50169921	20	7	28	0.714285714	0.25	0
Blass2014a-06	COc1cc(/C=c2\sc3nc(-c4ccc(Cl)cc4)cn3c2=O)cc(Cl)c1O	10.1021/ml500147n					2			ThR	t	f	Not specified	Not specified		Fluorescence Displacement	Not specified	InChI=1S/C19H12Cl2N2O3S/c1-26-15-7-10(6-13(21)17(15)24)8-16-18(25)23-9-14(22-19(23)27-16)11-2-4-12(20)5-3-11/h2-9,24H,1H3/b16-8-	InChI=1S/C19H12Cl2N2O3S/c1-26-15-7-10(6-13(21)17(15)24)8-16-18(25)23-9-14(22-19(23)27-16)11-2-4-12(20)5-3-11/h2-9,24H,1H3/b16-8-	419.289	3.9917	108.2388	6	1	63.83	4	3	4	0	0.052631579	27	0	0	2	2	8	0	0	0	0.503227401	0.273952112	0.273952112	-0.503227401	19	6	27	0.703703704	0.222222222	0
Blass2014a-06	COc1cc(/C=c2\sc3nc(-c4ccc(Cl)cc4)cn3c2=O)cc(Cl)c1O	10.1021/ml500147n					32			ThR	Ab	f	Not specified	Not specified		Fluorescence Displacement	Not specified	InChI=1S/C19H12Cl2N2O3S/c1-26-15-7-10(6-13(21)17(15)24)8-16-18(25)23-9-14(22-19(23)27-16)11-2-4-12(20)5-3-11/h2-9,24H,1H3/b16-8-	InChI=1S/C19H12Cl2N2O3S/c1-26-15-7-10(6-13(21)17(15)24)8-16-18(25)23-9-14(22-19(23)27-16)11-2-4-12(20)5-3-11/h2-9,24H,1H3/b16-8-	419.289	3.9917	108.2388	6	1	63.83	4	3	4	0	0.052631579	27	0	0	2	2	8	0	0	0	0.503227401	0.273952112	0.273952112	-0.503227401	19	6	27	0.703703704	0.222222222	0
Blass2014a-07	COc1cc(/C=c2\sc3nc(-c4ccc(Cl)cc4)cn3c2=O)cc(Br)c1O	10.1021/ml500147n					2			ThR	t	f	Not specified	Not specified		Fluorescence Displacement	Not specified	InChI=1S/C19H12BrClN2O3S/c1-26-15-7-10(6-13(20)17(15)24)8-16-18(25)23-9-14(22-19(23)27-16)11-2-4-12(21)5-3-11/h2-9,24H,1H3/b16-8-	InChI=1S/C19H12BrClN2O3S/c1-26-15-7-10(6-13(20)17(15)24)8-16-18(25)23-9-14(22-19(23)27-16)11-2-4-12(21)5-3-11/h2-9,24H,1H3/b16-8-	463.74	4.1008	110.9288	6	1	63.83	4	3	4	0	0.052631579	27	0	0	2	2	8	0	0	0	0.503476151	0.27395211	0.27395211	-0.503476151	19	6	27	0.703703704	0.222222222	0
Blass2014a-07	COc1cc(/C=c2\sc3nc(-c4ccc(Cl)cc4)cn3c2=O)cc(Br)c1O	10.1021/ml500147n					18			ThR	Ab	f	Not specified	Not specified		Fluorescence Displacement	Not specified	InChI=1S/C19H12BrClN2O3S/c1-26-15-7-10(6-13(20)17(15)24)8-16-18(25)23-9-14(22-19(23)27-16)11-2-4-12(21)5-3-11/h2-9,24H,1H3/b16-8-	InChI=1S/C19H12BrClN2O3S/c1-26-15-7-10(6-13(20)17(15)24)8-16-18(25)23-9-14(22-19(23)27-16)11-2-4-12(21)5-3-11/h2-9,24H,1H3/b16-8-	463.74	4.1008	110.9288	6	1	63.83	4	3	4	0	0.052631579	27	0	0	2	2	8	0	0	0	0.503476151	0.27395211	0.27395211	-0.503476151	19	6	27	0.703703704	0.222222222	0
Blass2014a-08	COc1cc(/C=c2\sc3nc(-c4ccc(Cl)cc4)cn3c2=O)cc(O)c1O	10.1021/ml500147n					5			ThR	t	f	Not specified	Not specified		Fluorescence Displacement	Not specified	InChI=1S/C19H13ClN2O4S/c1-26-15-7-10(6-14(23)17(15)24)8-16-18(25)22-9-13(21-19(22)27-16)11-2-4-12(20)5-3-11/h2-9,23-24H,1H3/b16-8-	InChI=1S/C19H13ClN2O4S/c1-26-15-7-10(6-14(23)17(15)24)8-16-18(25)22-9-13(21-19(22)27-16)11-2-4-12(20)5-3-11/h2-9,23-24H,1H3/b16-8-	400.843	3.0439	104.8936	7	2	84.06	4	3	4	0	0.052631579	27	0	0	2	2	8	0	0	0	0.504146614	0.273952123	0.273952123	-0.504146614	19	7	27	0.703703704	0.259259259	0
Blass2014a-08	COc1cc(/C=c2\sc3nc(-c4ccc(Cl)cc4)cn3c2=O)cc(O)c1O	10.1021/ml500147n					18			ThR	Ab	f	Not specified	Not specified		Fluorescence Displacement	Not specified	InChI=1S/C19H13ClN2O4S/c1-26-15-7-10(6-14(23)17(15)24)8-16-18(25)22-9-13(21-19(22)27-16)11-2-4-12(20)5-3-11/h2-9,23-24H,1H3/b16-8-	InChI=1S/C19H13ClN2O4S/c1-26-15-7-10(6-14(23)17(15)24)8-16-18(25)22-9-13(21-19(22)27-16)11-2-4-12(20)5-3-11/h2-9,23-24H,1H3/b16-8-	400.843	3.0439	104.8936	7	2	84.06	4	3	4	0	0.052631579	27	0	0	2	2	8	0	0	0	0.504146614	0.273952123	0.273952123	-0.504146614	19	7	27	0.703703704	0.259259259	0
Blass2014a-12	COc1cc(/C=c2\sc3nc(-c4ccncc4C)cn3c2=O)ccc1O	10.1021/ml500147n					79			ThR	t	f	Not specified	Not specified		Fluorescence Displacement	Not specified	InChI=1S/C19H15N3O3S/c1-11-9-20-6-5-13(11)14-10-22-18(24)17(26-19(22)21-14)8-12-3-4-15(23)16(7-12)25-2/h3-10,23H,1-2H3/b17-8-	InChI=1S/C19H15N3O3S/c1-11-9-20-6-5-13(11)14-10-22-18(24)17(26-19(22)21-14)8-12-3-4-15(23)16(7-12)25-2/h3-10,23H,1-2H3/b17-8-	365.414	2.38832	100.7508	7	1	76.72	4	3	4	0	0.105263158	26	0	0	1	3	7	0	0	0	0.504254344	0.273952106	0.273952106	-0.504254344	19	7	26	0.730769231	0.269230769	0
Blass2014a-12	COc1cc(/C=c2\sc3nc(-c4ccncc4C)cn3c2=O)ccc1O	10.1021/ml500147n					>10000			ThR	Ab	f	Not specified	Not specified		Fluorescence Displacement	Not specified	InChI=1S/C19H15N3O3S/c1-11-9-20-6-5-13(11)14-10-22-18(24)17(26-19(22)21-14)8-12-3-4-15(23)16(7-12)25-2/h3-10,23H,1-2H3/b17-8-	InChI=1S/C19H15N3O3S/c1-11-9-20-6-5-13(11)14-10-22-18(24)17(26-19(22)21-14)8-12-3-4-15(23)16(7-12)25-2/h3-10,23H,1-2H3/b17-8-	365.414	2.38832	100.7508	7	1	76.72	4	3	4	0	0.105263158	26	0	0	1	3	7	0	0	0	0.504254344	0.273952106	0.273952106	-0.504254344	19	7	26	0.730769231	0.269230769	0
Blass2014a-16	COc1cc(/C=c2\sc3nc(-c4ccncc4C)cn3c2=O)cc(OC)c1O	10.1021/ml500147n					8			ThR	t	f	Not specified	Not specified		Fluorescence Displacement	Not specified	InChI=1S/C20H17N3O4S/c1-11-9-21-5-4-13(11)14-10-23-19(25)17(28-20(23)22-14)8-12-6-15(26-2)18(24)16(7-12)27-3/h4-10,24H,1-3H3/b17-8-	InChI=1S/C20H17N3O4S/c1-11-9-21-5-4-13(11)14-10-23-19(25)17(28-20(23)22-14)8-12-6-15(26-2)18(24)16(7-12)27-3/h4-10,24H,1-3H3/b17-8-	395.44	2.39692	107.3028	8	1	85.95	4	4	4	0	0.15	28	0	0	1	3	8	0	0	0	0.50169921	0.273952125	0.273952125	-0.50169921	20	8	28	0.714285714	0.285714286	0
Blass2014a-16	COc1cc(/C=c2\sc3nc(-c4ccncc4C)cn3c2=O)cc(OC)c1O	10.1021/ml500147n					32			ThR	Ab	f	Not specified	Not specified		Fluorescence Displacement	Not specified	InChI=1S/C20H17N3O4S/c1-11-9-21-5-4-13(11)14-10-23-19(25)17(28-20(23)22-14)8-12-6-15(26-2)18(24)16(7-12)27-3/h4-10,24H,1-3H3/b17-8-	InChI=1S/C20H17N3O4S/c1-11-9-21-5-4-13(11)14-10-23-19(25)17(28-20(23)22-14)8-12-6-15(26-2)18(24)16(7-12)27-3/h4-10,24H,1-3H3/b17-8-	395.44	2.39692	107.3028	8	1	85.95	4	4	4	0	0.15	28	0	0	1	3	8	0	0	0	0.50169921	0.273952125	0.273952125	-0.50169921	20	8	28	0.714285714	0.285714286	0
Blass2014a-21	COc1cc(/C=c2\sc3nc(-c4cccc(Cl)c4)cn3c2=O)cc(OC)c1O	10.1021/ml500147n					1			ThR	t	f	Not specified	Not specified		Fluorescence Displacement	Not specified	InChI=1S/C20H15ClN2O4S/c1-26-15-6-11(7-16(27-2)18(15)24)8-17-19(25)23-10-14(22-20(23)28-17)12-4-3-5-13(21)9-12/h3-10,24H,1-2H3/b17-8-	InChI=1S/C20H15ClN2O4S/c1-26-15-6-11(7-16(27-2)18(15)24)8-17-19(25)23-10-14(22-20(23)28-17)12-4-3-5-13(21)9-12/h3-10,24H,1-2H3/b17-8-	414.87	3.3469	109.7808	7	1	73.06	4	4	4	0	0.1	28	0	0	2	2	8	0	0	0	0.50169921	0.273952123	0.273952123	-0.50169921	20	7	28	0.714285714	0.25	0
Blass2014a-21	COc1cc(/C=c2\sc3nc(-c4cccc(Cl)c4)cn3c2=O)cc(OC)c1O	10.1021/ml500147n					6			ThR	Ab	f	Not specified	Not specified		Fluorescence Displacement	Not specified	InChI=1S/C20H15ClN2O4S/c1-26-15-6-11(7-16(27-2)18(15)24)8-17-19(25)23-10-14(22-20(23)28-17)12-4-3-5-13(21)9-12/h3-10,24H,1-2H3/b17-8-	InChI=1S/C20H15ClN2O4S/c1-26-15-6-11(7-16(27-2)18(15)24)8-17-19(25)23-10-14(22-20(23)28-17)12-4-3-5-13(21)9-12/h3-10,24H,1-2H3/b17-8-	414.87	3.3469	109.7808	7	1	73.06	4	4	4	0	0.1	28	0	0	2	2	8	0	0	0	0.50169921	0.273952123	0.273952123	-0.50169921	20	7	28	0.714285714	0.25	0
Blass2014a-24	COc1cc(/C=c2\sc3nc(-c4cccc(C(F)(F)F)c4)cn3c2=O)cc(Cl)c1O	10.1021/ml500147n					3			ThR	t	f	Not specified	Not specified		Fluorescence Displacement	Not specified	InChI=1S/C20H12ClF3N2O3S/c1-29-15-6-10(5-13(21)17(15)27)7-16-18(28)26-9-14(25-19(26)30-16)11-3-2-4-12(8-11)20(22,23)24/h2-9,27H,1H3/b16-7-	InChI=1S/C20H12ClF3N2O3S/c1-29-15-6-10(5-13(21)17(15)27)7-16-18(28)26-9-14(25-19(26)30-16)11-3-2-4-12(8-11)20(22,23)24/h2-9,27H,1H3/b16-7-	452.841	4.3571	108.2308	6	1	63.83	4	3	4	0	0.1	30	0	0	2	2	10	0	0	0	0.503227401	0.415932187	0.415932187	-0.503227401	20	6	30	0.666666667	0.2	0
Blass2014a-24	COc1cc(/C=c2\sc3nc(-c4cccc(C(F)(F)F)c4)cn3c2=O)cc(Cl)c1O	10.1021/ml500147n					123			ThR	Ab	f	Not specified	Not specified		Fluorescence Displacement	Not specified	InChI=1S/C20H12ClF3N2O3S/c1-29-15-6-10(5-13(21)17(15)27)7-16-18(28)26-9-14(25-19(26)30-16)11-3-2-4-12(8-11)20(22,23)24/h2-9,27H,1H3/b16-7-	InChI=1S/C20H12ClF3N2O3S/c1-29-15-6-10(5-13(21)17(15)27)7-16-18(28)26-9-14(25-19(26)30-16)11-3-2-4-12(8-11)20(22,23)24/h2-9,27H,1H3/b16-7-	452.841	4.3571	108.2308	6	1	63.83	4	3	4	0	0.1	30	0	0	2	2	10	0	0	0	0.503227401	0.415932187	0.415932187	-0.503227401	20	6	30	0.666666667	0.2	0
Blass2014a-35	COc1cc(/C=c2\sc3nc(-c4cccc(OC(F)(F)F)c4)cn3c2=O)cc(F)c1O	10.1021/ml500147n					13			ThR	t	f	Not specified	Not specified		Fluorescence Displacement	Not specified	InChI=1S/C20H12F4N2O4S/c1-29-15-6-10(5-13(21)17(15)27)7-16-18(28)26-9-14(25-19(26)31-16)11-3-2-4-12(8-11)30-20(22,23)24/h2-9,27H,1H3/b16-7-	InChI=1S/C20H12F4N2O4S/c1-29-15-6-10(5-13(21)17(15)27)7-16-18(28)26-9-14(25-19(26)31-16)11-3-2-4-12(8-11)30-20(22,23)24/h2-9,27H,1H3/b16-7-	452.385	3.7226	104.8598	7	1	73.06	4	4	4	0	0.1	31	0	0	2	2	11	0	0	0	0.572596652	0.572596652	0.502236968	-0.502236968	20	7	31	0.64516129	0.225806452	0
Blass2014a-35	COc1cc(/C=c2\sc3nc(-c4cccc(OC(F)(F)F)c4)cn3c2=O)cc(F)c1O	10.1021/ml500147n					>10000			ThR	Ab	f	Not specified	Not specified		Fluorescence Displacement	Not specified	InChI=1S/C20H12F4N2O4S/c1-29-15-6-10(5-13(21)17(15)27)7-16-18(28)26-9-14(25-19(26)31-16)11-3-2-4-12(8-11)30-20(22,23)24/h2-9,27H,1H3/b16-7-	InChI=1S/C20H12F4N2O4S/c1-29-15-6-10(5-13(21)17(15)27)7-16-18(28)26-9-14(25-19(26)31-16)11-3-2-4-12(8-11)30-20(22,23)24/h2-9,27H,1H3/b16-7-	452.385	3.7226	104.8598	7	1	73.06	4	4	4	0	0.1	31	0	0	2	2	11	0	0	0	0.572596652	0.572596652	0.502236968	-0.502236968	20	7	31	0.64516129	0.225806452	0
[18F]GTP1	[18F]C([2H])(CC1CCN(C2=NC3=NC4=CC=CC=C4N3C=C2)CC1)[2H]	10.1007/s00259-019-04399-0		10.76666667		10.76666667		1.05039675	-7.967918732		AD	b	tau+ AD	Frozen unfixed cortical tissues from AD donors, confirmed by neuropathological diagnosis using CERAD criteria, were obtained from Banner Sun Health Research Institute (Sun City, AZ, USA). The individual tissues were further evaluated by immunohistochemical staining for β-amyloid plaques and neurofibrillary tangles to confirm presence or absence of pa- thology in each sample		Autoradiography	The no-carrier- added [18F]GTP1 was dissolved in PBS containing 5% DMSO and 5% ethanol at final concentration 1.5 MBq/ml (111–174 pg/ml). Then, 0.5 ml of stock solution was trans- ferred to a microscope slide with 5-μm-thick freshly dried tissue section and incubated for 90 min at room temperature (RT). The slides were washed by dipping into the following chilled (4°C) solutions: PBS for 1 min, 7…	InChI=1S/C17H19FN4/c18-9-5-13-6-10-21(11-7-13)16-8-12-22-15-4-2-1-3-14(15)19-17(22)20-16/h1-4,8,12-13H,5-7,9-11H2/i9D2,18-1	InChI=1S/C17H19FN4/c18-9-5-13-6-10-21(11-7-13)16-8-12-22-15-4-2-1-3-14(15)19-17(22)20-16/h1-4,8,12-13H,5-7,9-11H2	299.3801416	3.4585	86.022	4	0	33.43	4	3	3	1	0.411764706	22	0	1	1	2	5	0	1	1	0.35643653	0.236287059	0.236287059	-0.35643653	17	4	24	0.708333333	0.166666667	0
Bolander05	OC1=CC=C(/C=C/C2=CC=C(/C=C/C3=CC=C(O)C=C3)C(OC)=C2)C=C1	10.1021/jm300653b			123	123	246		-6.910094889	ThR	t	f	Recombinant (E. Coli)	Recombinant human microtubule associated tau protein purified from E. coli was aggregated at a concentration of 5 μM with arachidonic acid (100 μM) in Tris 10 mM, pH 8, 24 h at 37 °C.		Fluorescence Displacement	Thiazine red was added at the concentration corresponding to the Kd of the respective aggregated protein binding site to induce a fluorescent signal that can be inhibited by the addition of a displacer compound. The assay was performed in Perkin-Elmer OptiPlate 384, black, 45 mL assay volume. As assay buffer, DPBS (no CaCl2, no MgCl2) (GIBCO N. 14020) was used. The tested compounds were dissolved…	InChI=1S/C23H20O3/c1-26-23-16-19(3-2-17-6-12-21(24)13-7-17)5-11-20(23)10-4-18-8-14-22(25)15-9-18/h2-16,24-25H,1H3/b3-2+,10-4+	InChI=1S/C23H20O3/c1-26-23-16-19(3-2-17-6-12-21(24)13-7-17)5-11-20(23)10-4-18-8-14-22(25)15-9-18/h2-16,24-25H,1H3/b3-2+,10-4+	344.41	5.4472	107.0636	3	2	49.69	3	5	3	0	0.043478261	26	0	0	3	0	3	0	0	0	0.507966251	0.126174278	0.126174278	-0.507966251	23	3	26	0.884615385	0.115384615	0
Bolander05	OC1=CC=C(/C=C/C2=CC=C(/C=C/C3=CC=C(O)C=C3)C(OC)=C2)C=C1	10.1021/jm300653b			70	70	140		-7.15490196	ThR	Ab40	f	Synthetic	Synthetic Aß40 was aggregated at a concentration of 50 μM with arachidonic acid (100 μM) in Tris 10 mM, pH 8, for 3 days at 37 °C, under shaking at 150 rpm.		Fluorescence Displacement	Thiazine red was added at the concentration corresponding to the Kd of the respective aggregated protein binding site to induce a fluorescent signal that can be inhibited by the addition of a displacer compound. The assay was performed in Perkin-Elmer OptiPlate 384, black, 45 mL assay volume. As assay buffer, DPBS (no CaCl2, no MgCl2) (GIBCO N. 14020) was used. The tested compounds were dissolved…	InChI=1S/C23H20O3/c1-26-23-16-19(3-2-17-6-12-21(24)13-7-17)5-11-20(23)10-4-18-8-14-22(25)15-9-18/h2-16,24-25H,1H3/b3-2+,10-4+	InChI=1S/C23H20O3/c1-26-23-16-19(3-2-17-6-12-21(24)13-7-17)5-11-20(23)10-4-18-8-14-22(25)15-9-18/h2-16,24-25H,1H3/b3-2+,10-4+	344.41	5.4472	107.0636	3	2	49.69	3	5	3	0	0.043478261	26	0	0	3	0	3	0	0	0	0.507966251	0.126174278	0.126174278	-0.507966251	23	3	26	0.884615385	0.115384615	0
Bolander06c	COC1=CC=C(/C=C/C2=CN=C(/C=C/C3=CC=C(OC)C=C3)C=N2)C=C1	10.1021/jm300653b			6.5	6.5	13		-8.187086643	ThR	t	f	Recombinant (E. Coli)	Recombinant human microtubule associated tau protein purified from E. coli was aggregated at a concentration of 5 μM with arachidonic acid (100 μM) in Tris 10 mM, pH 8, 24 h at 37 °C.		Fluorescence Displacement	Thiazine red was added at the concentration corresponding to the Kd of the respective aggregated protein binding site to induce a fluorescent signal that can be inhibited by the addition of a displacer compound. The assay was performed in Perkin-Elmer OptiPlate 384, black, 45 mL assay volume. As assay buffer, DPBS (no CaCl2, no MgCl2) (GIBCO N. 14020) was used. The tested compounds were dissolved…	InChI=1S/C22H20N2O2/c1-25-21-11-5-17(6-12-21)3-9-19-15-24-20(16-23-19)10-4-18-7-13-22(26-2)14-8-18/h3-16H,1-2H3/b9-3+,10-4+	InChI=1S/C22H20N2O2/c1-25-21-11-5-17(6-12-21)3-9-19-15-24-20(16-23-19)10-4-18-7-13-22(26-2)14-8-18/h3-16H,1-2H3/b9-3+,10-4+	344.414	4.8346	105.876	4	0	44.24	3	6	3	0	0.090909091	26	0	0	2	1	4	0	0	0	0.496767824	0.118400593	0.118400593	-0.496767824	22	4	26	0.846153846	0.153846154	0
Bolander06c	COC1=CC=C(/C=C/C2=CN=C(/C=C/C3=CC=C(OC)C=C3)C=N2)C=C1	10.1021/jm300653b			8.5	8.5	17		-8.070581074	ThR	Ab40	f		Synthetic Aß40 was aggregated at a concentration of 50 μM with arachidonic acid (100 μM) in Tris 10 mM, pH 8, for 3 days at 37 °C, under shaking at 150 rpm.		Fluorescence Displacement	Thiazine red was added at the concentration corresponding to the Kd of the respective aggregated protein binding site to induce a fluorescent signal that can be inhibited by the addition of a displacer compound. The assay was performed in Perkin-Elmer OptiPlate 384, black, 45 mL assay volume. As assay buffer, DPBS (no CaCl2, no MgCl2) (GIBCO N. 14020) was used. The tested compounds were dissolved…	InChI=1S/C22H20N2O2/c1-25-21-11-5-17(6-12-21)3-9-19-15-24-20(16-23-19)10-4-18-7-13-22(26-2)14-8-18/h3-16H,1-2H3/b9-3+,10-4+	InChI=1S/C22H20N2O2/c1-25-21-11-5-17(6-12-21)3-9-19-15-24-20(16-23-19)10-4-18-7-13-22(26-2)14-8-18/h3-16H,1-2H3/b9-3+,10-4+	344.414	4.8346	105.876	4	0	44.24	3	6	3	0	0.090909091	26	0	0	2	1	4	0	0	0	0.496767824	0.118400593	0.118400593	-0.496767824	22	4	26	0.846153846	0.153846154	0
Bolander06e	C1(N2CCOCC2)=CC=C(/C=C/C3=CN=C(/C=C/C4=CC=C(N5CCOCC5)C=C4)C=N3)C=C1	10.1021/jm300653b			3	3	6		-8.522878745	ThR	t	f	Recombinant (E. Coli)	Recombinant human microtubule associated tau protein purified from E. coli was aggregated at a concentration of 5 μM with arachidonic acid (100 μM) in Tris 10 mM, pH 8, 24 h at 37 °C.		Fluorescence Displacement	Thiazine red was added at the concentration corresponding to the Kd of the respective aggregated protein binding site to induce a fluorescent signal that can be inhibited by the addition of a displacer compound. The assay was performed in Perkin-Elmer OptiPlate 384, black, 45 mL assay volume. As assay buffer, DPBS (no CaCl2, no MgCl2) (GIBCO N. 14020) was used. The tested compounds were dissolved…	InChI=1S/C28H30N4O2/c1(23-3-9-27(10-4-23)31-13-17-33-18-14-31)7-25-21-30-26(22-29-25)8-2-24-5-11-28(12-6-24)32-15-19-34-20-16-32/h1-12,21-22H,13-20H2/b7-1+,8-2+	InChI=1S/C28H30N4O2/c1(23-3-9-27(10-4-23)31-13-17-33-18-14-31)7-25-21-30-26(22-29-25)8-2-24-5-11-28(12-6-24)32-15-19-34-20-16-32/h1-12,21-22H,13-20H2/b7-1+,8-2+	454.574	4.4906	138.836	6	0	50.72	5	6	3	2	0.285714286	34	0	2	2	1	6	0	2	2	0.37777782	0.081316088	0.081316088	-0.37777782	28	6	34	0.823529412	0.176470588	0
Bolander06e	C1(N2CCOCC2)=CC=C(/C=C/C3=CN=C(/C=C/C4=CC=C(N5CCOCC5)C=C4)C=N3)C=C1	10.1021/jm300653b			21.5	21.5	43		-7.66756154	ThR	Ab40	f		Synthetic Aß40 was aggregated at a concentration of 50 μM with arachidonic acid (100 μM) in Tris 10 mM, pH 8, for 3 days at 37 °C, under shaking at 150 rpm.		Fluorescence Displacement	Thiazine red was added at the concentration corresponding to the Kd of the respective aggregated protein binding site to induce a fluorescent signal that can be inhibited by the addition of a displacer compound. The assay was performed in Perkin-Elmer OptiPlate 384, black, 45 mL assay volume. As assay buffer, DPBS (no CaCl2, no MgCl2) (GIBCO N. 14020) was used. The tested compounds were dissolved…	InChI=1S/C28H30N4O2/c1(23-3-9-27(10-4-23)31-13-17-33-18-14-31)7-25-21-30-26(22-29-25)8-2-24-5-11-28(12-6-24)32-15-19-34-20-16-32/h1-12,21-22H,13-20H2/b7-1+,8-2+	InChI=1S/C28H30N4O2/c1(23-3-9-27(10-4-23)31-13-17-33-18-14-31)7-25-21-30-26(22-29-25)8-2-24-5-11-28(12-6-24)32-15-19-34-20-16-32/h1-12,21-22H,13-20H2/b7-1+,8-2+	454.574	4.4906	138.836	6	0	50.72	5	6	3	2	0.285714286	34	0	2	2	1	6	0	2	2	0.37777782	0.081316088	0.081316088	-0.37777782	28	6	34	0.823529412	0.176470588	0
Bolander06f	CN(CC1)CCN1C2=CC=C(/C=C/C3=CN=C(/C=C/C4=CC=C(N5CCN(C)CC5)C=C4)C=N3)C=C2	10.1021/jm300653b			21	21	42		-7.677780705	ThR	t	f	Recombinant (E. Coli)	Recombinant human microtubule associated tau protein purified from E. coli was aggregated at a concentration of 5 μM with arachidonic acid (100 μM) in Tris 10 mM, pH 8, 24 h at 37 °C.		Fluorescence Displacement	Thiazine red was added at the concentration corresponding to the Kd of the respective aggregated protein binding site to induce a fluorescent signal that can be inhibited by the addition of a displacer compound. The assay was performed in Perkin-Elmer OptiPlate 384, black, 45 mL assay volume. As assay buffer, DPBS (no CaCl2, no MgCl2) (GIBCO N. 14020) was used. The tested compounds were dissolved…	InChI=1S/C30H36N6/c1-33-15-19-35(20-16-33)29-11-5-25(6-12-29)3-9-27-23-32-28(24-31-27)10-4-26-7-13-30(14-8-26)36-21-17-34(2)18-22-36/h3-14,23-24H,15-22H2,1-2H3/b9-3+,10-4+	InChI=1S/C30H36N6/c1-33-15-19-35(20-16-33)29-11-5-25(6-12-29)3-9-27-23-32-28(24-31-27)10-4-26-7-13-30(14-8-26)36-21-17-34(2)18-22-36/h3-14,23-24H,15-22H2,1-2H3/b9-3+,10-4+	480.66	4.321	152.192	6	0	38.74	5	6	3	2	0.333333333	36	0	2	2	1	6	0	2	2	0.368966195	0.081316088	0.081316088	-0.368966195	30	6	36	0.833333333	0.166666667	0
Bolander06f	CN(CC1)CCN1C2=CC=C(/C=C/C3=CN=C(/C=C/C4=CC=C(N5CCN(C)CC5)C=C4)C=N3)C=C2	10.1021/jm300653b			25.5	25.5	51		-7.59345982	ThR	Ab40	f		Synthetic Aß40 was aggregated at a concentration of 50 μM with arachidonic acid (100 μM) in Tris 10 mM, pH 8, for 3 days at 37 °C, under shaking at 150 rpm.		Fluorescence Displacement	Thiazine red was added at the concentration corresponding to the Kd of the respective aggregated protein binding site to induce a fluorescent signal that can be inhibited by the addition of a displacer compound. The assay was performed in Perkin-Elmer OptiPlate 384, black, 45 mL assay volume. As assay buffer, DPBS (no CaCl2, no MgCl2) (GIBCO N. 14020) was used. The tested compounds were dissolved…	InChI=1S/C30H36N6/c1-33-15-19-35(20-16-33)29-11-5-25(6-12-29)3-9-27-23-32-28(24-31-27)10-4-26-7-13-30(14-8-26)36-21-17-34(2)18-22-36/h3-14,23-24H,15-22H2,1-2H3/b9-3+,10-4+	InChI=1S/C30H36N6/c1-33-15-19-35(20-16-33)29-11-5-25(6-12-29)3-9-27-23-32-28(24-31-27)10-4-26-7-13-30(14-8-26)36-21-17-34(2)18-22-36/h3-14,23-24H,15-22H2,1-2H3/b9-3+,10-4+	480.66	4.321	152.192	6	0	38.74	5	6	3	2	0.333333333	36	0	2	2	1	6	0	2	2	0.368966195	0.081316088	0.081316088	-0.368966195	30	6	36	0.833333333	0.166666667	0
Bolander07a	CN(C)C(C=C1)=CC=C1/C=C/C2=NC=NC(/C=C/C(C=C3)=CC=C3N(C)C)=C2	10.1021/jm300653b			2	2	4		-8.698970004	ThR	t	f	Recombinant (E. Coli)	Recombinant human microtubule associated tau protein purified from E. coli was aggregated at a concentration of 5 μM with arachidonic acid (100 μM) in Tris 10 mM, pH 8, 24 h at 37 °C.		Fluorescence Displacement	Thiazine red was added at the concentration corresponding to the Kd of the respective aggregated protein binding site to induce a fluorescent signal that can be inhibited by the addition of a displacer compound. The assay was performed in Perkin-Elmer OptiPlate 384, black, 45 mL assay volume. As assay buffer, DPBS (no CaCl2, no MgCl2) (GIBCO N. 14020) was used. The tested compounds were dissolved…	InChI=1S/C24H26N4/c1-27(2)23-13-7-19(8-14-23)5-11-21-17-22(26-18-25-21)12-6-20-9-15-24(16-10-20)28(3)4/h5-18H,1-4H3/b11-5+,12-6+	InChI=1S/C24H26N4/c1-27(2)23-13-7-19(8-14-23)5-11-21-17-22(26-18-25-21)12-6-20-9-15-24(16-10-20)28(3)4/h5-18H,1-4H3/b11-5+,12-6+	370.5	4.9494	121.426	4	0	32.26	3	6	3	0	0.166666667	28	0	0	2	1	4	0	0	0	0.37766091	0.116221044	0.116221044	-0.37766091	24	4	28	0.857142857	0.142857143	0
Bolander07a	CN(C)C(C=C1)=CC=C1/C=C/C2=NC=NC(/C=C/C(C=C3)=CC=C3N(C)C)=C2	10.1021/jm300653b			27	27	54		-7.568636236	ThR	Ab40	f		Synthetic Aß40 was aggregated at a concentration of 50 μM with arachidonic acid (100 μM) in Tris 10 mM, pH 8, for 3 days at 37 °C, under shaking at 150 rpm.		Fluorescence Displacement	Thiazine red was added at the concentration corresponding to the Kd of the respective aggregated protein binding site to induce a fluorescent signal that can be inhibited by the addition of a displacer compound. The assay was performed in Perkin-Elmer OptiPlate 384, black, 45 mL assay volume. As assay buffer, DPBS (no CaCl2, no MgCl2) (GIBCO N. 14020) was used. The tested compounds were dissolved…	InChI=1S/C24H26N4/c1-27(2)23-13-7-19(8-14-23)5-11-21-17-22(26-18-25-21)12-6-20-9-15-24(16-10-20)28(3)4/h5-18H,1-4H3/b11-5+,12-6+	InChI=1S/C24H26N4/c1-27(2)23-13-7-19(8-14-23)5-11-21-17-22(26-18-25-21)12-6-20-9-15-24(16-10-20)28(3)4/h5-18H,1-4H3/b11-5+,12-6+	370.5	4.9494	121.426	4	0	32.26	3	6	3	0	0.166666667	28	0	0	2	1	4	0	0	0	0.37766091	0.116221044	0.116221044	-0.37766091	24	4	28	0.857142857	0.142857143	0
Bolander07c	CN1CCN(CC1)C2=CC=C(/C=C/C3=CC(/C=C/C4=CC=C(N5CCN(C)CC5)C=C4)=NC=N3)C=C2	10.1021/jm300653b			3734.5	3734.5	7469		-5.427767536	ThR	t	f	Recombinant (E. Coli)	Recombinant human microtubule associated tau protein purified from E. coli was aggregated at a concentration of 5 μM with arachidonic acid (100 μM) in Tris 10 mM, pH 8, 24 h at 37 °C.		Fluorescence Displacement	Thiazine red was added at the concentration corresponding to the Kd of the respective aggregated protein binding site to induce a fluorescent signal that can be inhibited by the addition of a displacer compound. The assay was performed in Perkin-Elmer OptiPlate 384, black, 45 mL assay volume. As assay buffer, DPBS (no CaCl2, no MgCl2) (GIBCO N. 14020) was used. The tested compounds were dissolved…	InChI=1S/C30H36N6/c1-33-15-19-35(20-16-33)29-11-5-25(6-12-29)3-9-27-23-28(32-24-31-27)10-4-26-7-13-30(14-8-26)36-21-17-34(2)18-22-36/h3-14,23-24H,15-22H2,1-2H3/b9-3+,10-4+	InChI=1S/C30H36N6/c1-33-15-19-35(20-16-33)29-11-5-25(6-12-29)3-9-27-23-28(32-24-31-27)10-4-26-7-13-30(14-8-26)36-21-17-34(2)18-22-36/h3-14,23-24H,15-22H2,1-2H3/b9-3+,10-4+	480.66	4.321	152.192	6	0	38.74	5	6	3	2	0.333333333	36	0	2	2	1	6	0	2	2	0.368966195	0.116221044	0.116221044	-0.368966195	30	6	36	0.833333333	0.166666667	0
Bolander07c	CN1CCN(CC1)C2=CC=C(/C=C/C3=CC(/C=C/C4=CC=C(N5CCN(C)CC5)C=C4)=NC=N3)C=C2	10.1021/jm300653b			1190.5	1190.5	2381		-5.9242706	ThR	Ab40	f		Synthetic Aß40 was aggregated at a concentration of 50 μM with arachidonic acid (100 μM) in Tris 10 mM, pH 8, for 3 days at 37 °C, under shaking at 150 rpm.		Fluorescence Displacement	Thiazine red was added at the concentration corresponding to the Kd of the respective aggregated protein binding site to induce a fluorescent signal that can be inhibited by the addition of a displacer compound. The assay was performed in Perkin-Elmer OptiPlate 384, black, 45 mL assay volume. As assay buffer, DPBS (no CaCl2, no MgCl2) (GIBCO N. 14020) was used. The tested compounds were dissolved…	InChI=1S/C30H36N6/c1-33-15-19-35(20-16-33)29-11-5-25(6-12-29)3-9-27-23-28(32-24-31-27)10-4-26-7-13-30(14-8-26)36-21-17-34(2)18-22-36/h3-14,23-24H,15-22H2,1-2H3/b9-3+,10-4+	InChI=1S/C30H36N6/c1-33-15-19-35(20-16-33)29-11-5-25(6-12-29)3-9-27-23-28(32-24-31-27)10-4-26-7-13-30(14-8-26)36-21-17-34(2)18-22-36/h3-14,23-24H,15-22H2,1-2H3/b9-3+,10-4+	480.66	4.321	152.192	6	0	38.74	5	6	3	2	0.333333333	36	0	2	2	1	6	0	2	2	0.368966195	0.116221044	0.116221044	-0.368966195	30	6	36	0.833333333	0.166666667	0
Bolander07d	N1(CCCCC1)C2=CC=C(/C=C/C3=CC(/C=C/C4=CC=C(N5CCCCC5)C=C4)=NC=N3)C=C2	10.1021/jm300653b			8.5	8.5	17		-8.070581074	ThR	t	f	Recombinant (E. Coli)	Recombinant human microtubule associated tau protein purified from E. coli was aggregated at a concentration of 5 μM with arachidonic acid (100 μM) in Tris 10 mM, pH 8, 24 h at 37 °C.		Fluorescence Displacement	Thiazine red was added at the concentration corresponding to the Kd of the respective aggregated protein binding site to induce a fluorescent signal that can be inhibited by the addition of a displacer compound. The assay was performed in Perkin-Elmer OptiPlate 384, black, 45 mL assay volume. As assay buffer, DPBS (no CaCl2, no MgCl2) (GIBCO N. 14020) was used. The tested compounds were dissolved…	InChI=1S/C30H34N4/c1-3-19-33(20-4-1)29-15-9-25(10-16-29)7-13-27-23-28(32-24-31-27)14-8-26-11-17-30(18-12-26)34-21-5-2-6-22-34/h7-18,23-24H,1-6,19-22H2/b13-7+,14-8+	InChI=1S/C30H34N4/c1-3-19-33(20-4-1)29-15-9-25(10-16-29)7-13-27-23-28(32-24-31-27)14-8-26-11-17-30(18-12-26)34-21-5-2-6-22-34/h7-18,23-24H,1-6,19-22H2/b13-7+,14-8+	450.63	6.798	144.9	4	0	32.26	5	6	3	2	0.333333333	34	0	2	2	1	4	0	2	2	0.371537159	0.116221044	0.116221044	-0.371537159	30	4	34	0.882352941	0.117647059	0
Bolander07d	N1(CCCCC1)C2=CC=C(/C=C/C3=CC(/C=C/C4=CC=C(N5CCCCC5)C=C4)=NC=N3)C=C2	10.1021/jm300653b			78	78	156		-7.107905397	ThR	Ab40	f		Synthetic Aß40 was aggregated at a concentration of 50 μM with arachidonic acid (100 μM) in Tris 10 mM, pH 8, for 3 days at 37 °C, under shaking at 150 rpm.		Fluorescence Displacement	Thiazine red was added at the concentration corresponding to the Kd of the respective aggregated protein binding site to induce a fluorescent signal that can be inhibited by the addition of a displacer compound. The assay was performed in Perkin-Elmer OptiPlate 384, black, 45 mL assay volume. As assay buffer, DPBS (no CaCl2, no MgCl2) (GIBCO N. 14020) was used. The tested compounds were dissolved…	InChI=1S/C30H34N4/c1-3-19-33(20-4-1)29-15-9-25(10-16-29)7-13-27-23-28(32-24-31-27)14-8-26-11-17-30(18-12-26)34-21-5-2-6-22-34/h7-18,23-24H,1-6,19-22H2/b13-7+,14-8+	InChI=1S/C30H34N4/c1-3-19-33(20-4-1)29-15-9-25(10-16-29)7-13-27-23-28(32-24-31-27)14-8-26-11-17-30(18-12-26)34-21-5-2-6-22-34/h7-18,23-24H,1-6,19-22H2/b13-7+,14-8+	450.63	6.798	144.9	4	0	32.26	5	6	3	2	0.333333333	34	0	2	2	1	4	0	2	2	0.371537159	0.116221044	0.116221044	-0.371537159	30	4	34	0.882352941	0.117647059	0
Bolander07e	N1(CCCC1)C2=CC=C(/C=C/C3=CC(/C=C/C4=CC=C(N5CCCC5)C=C4)=NC=N3)C=C2	10.1021/jm300653b			1	1	2		-9	ThR	t	f	Recombinant (E. Coli)	Recombinant human microtubule associated tau protein purified from E. coli was aggregated at a concentration of 5 μM with arachidonic acid (100 μM) in Tris 10 mM, pH 8, 24 h at 37 °C.		Fluorescence Displacement	Thiazine red was added at the concentration corresponding to the Kd of the respective aggregated protein binding site to induce a fluorescent signal that can be inhibited by the addition of a displacer compound. The assay was performed in Perkin-Elmer OptiPlate 384, black, 45 mL assay volume. As assay buffer, DPBS (no CaCl2, no MgCl2) (GIBCO N. 14020) was used. The tested compounds were dissolved…	InChI=1S/C28H30N4/c1-2-18-31(17-1)27-13-7-23(8-14-27)5-11-25-21-26(30-22-29-25)12-6-24-9-15-28(16-10-24)32-19-3-4-20-32/h5-16,21-22H,1-4,17-20H2/b11-5+,12-6+	InChI=1S/C28H30N4/c1-2-18-31(17-1)27-13-7-23(8-14-27)5-11-25-21-26(30-22-29-25)12-6-24-9-15-28(16-10-24)32-19-3-4-20-32/h5-16,21-22H,1-4,17-20H2/b11-5+,12-6+	422.576	6.0178	135.666	4	0	32.26	5	6	3	2	0.285714286	32	0	2	2	1	4	0	2	2	0.371534831	0.116221044	0.116221044	-0.371534831	28	4	32	0.875	0.125	0
Bolander07e	N1(CCCC1)C2=CC=C(/C=C/C3=CC(/C=C/C4=CC=C(N5CCCC5)C=C4)=NC=N3)C=C2	10.1021/jm300653b			26	26	52		-7.585026652	ThR	Ab40	f		Synthetic Aß40 was aggregated at a concentration of 50 μM with arachidonic acid (100 μM) in Tris 10 mM, pH 8, for 3 days at 37 °C, under shaking at 150 rpm.		Fluorescence Displacement	Thiazine red was added at the concentration corresponding to the Kd of the respective aggregated protein binding site to induce a fluorescent signal that can be inhibited by the addition of a displacer compound. The assay was performed in Perkin-Elmer OptiPlate 384, black, 45 mL assay volume. As assay buffer, DPBS (no CaCl2, no MgCl2) (GIBCO N. 14020) was used. The tested compounds were dissolved…	InChI=1S/C28H30N4/c1-2-18-31(17-1)27-13-7-23(8-14-27)5-11-25-21-26(30-22-29-25)12-6-24-9-15-28(16-10-24)32-19-3-4-20-32/h5-16,21-22H,1-4,17-20H2/b11-5+,12-6+	InChI=1S/C28H30N4/c1-2-18-31(17-1)27-13-7-23(8-14-27)5-11-25-21-26(30-22-29-25)12-6-24-9-15-28(16-10-24)32-19-3-4-20-32/h5-16,21-22H,1-4,17-20H2/b11-5+,12-6+	422.576	6.0178	135.666	4	0	32.26	5	6	3	2	0.285714286	32	0	2	2	1	4	0	2	2	0.371534831	0.116221044	0.116221044	-0.371534831	28	4	32	0.875	0.125	0
Bolander07f	CN(C)C(C=C1)=CC=C1/C=C/C=C/C2=CC(/C=C/C=C/C3=CC=C(N(C)C)C=C3)=NC=N2	10.1021/jm300653b			1	1	2		-9	ThR	t	f	Recombinant (E. Coli)	Recombinant human microtubule associated tau protein purified from E. coli was aggregated at a concentration of 5 μM with arachidonic acid (100 μM) in Tris 10 mM, pH 8, 24 h at 37 °C.		Fluorescence Displacement	Thiazine red was added at the concentration corresponding to the Kd of the respective aggregated protein binding site to induce a fluorescent signal that can be inhibited by the addition of a displacer compound. The assay was performed in Perkin-Elmer OptiPlate 384, black, 45 mL assay volume. As assay buffer, DPBS (no CaCl2, no MgCl2) (GIBCO N. 14020) was used. The tested compounds were dissolved…	InChI=1S/C28H30N4/c1-31(2)27-17-13-23(14-18-27)9-5-7-11-25-21-26(30-22-29-25)12-8-6-10-24-15-19-28(20-16-24)32(3)4/h5-22H,1-4H3/b9-5+,10-6+,11-7+,12-8+	InChI=1S/C28H30N4/c1-31(2)27-17-13-23(14-18-27)9-5-7-11-25-21-26(30-22-29-25)12-8-6-10-24-15-19-28(20-16-24)32(3)4/h5-22H,1-4H3/b9-5+,10-6+,11-7+,12-8+	422.576	6.0618	139.706	4	0	32.26	3	8	3	0	0.142857143	32	0	0	2	1	4	0	0	0	0.37766091	0.116221038	0.116221038	-0.37766091	28	4	32	0.875	0.125	0
Bolander07f	CN(C)C(C=C1)=CC=C1/C=C/C=C/C2=CC(/C=C/C=C/C3=CC=C(N(C)C)C=C3)=NC=N2	10.1021/jm300653b			1.5	1.5	3		-8.823908741	ThR	Ab40	f		Synthetic Aß40 was aggregated at a concentration of 50 μM with arachidonic acid (100 μM) in Tris 10 mM, pH 8, for 3 days at 37 °C, under shaking at 150 rpm.		Fluorescence Displacement	Thiazine red was added at the concentration corresponding to the Kd of the respective aggregated protein binding site to induce a fluorescent signal that can be inhibited by the addition of a displacer compound. The assay was performed in Perkin-Elmer OptiPlate 384, black, 45 mL assay volume. As assay buffer, DPBS (no CaCl2, no MgCl2) (GIBCO N. 14020) was used. The tested compounds were dissolved…	InChI=1S/C28H30N4/c1-31(2)27-17-13-23(14-18-27)9-5-7-11-25-21-26(30-22-29-25)12-8-6-10-24-15-19-28(20-16-24)32(3)4/h5-22H,1-4H3/b9-5+,10-6+,11-7+,12-8+	InChI=1S/C28H30N4/c1-31(2)27-17-13-23(14-18-27)9-5-7-11-25-21-26(30-22-29-25)12-8-6-10-24-15-19-28(20-16-24)32(3)4/h5-22H,1-4H3/b9-5+,10-6+,11-7+,12-8+	422.576	6.0618	139.706	4	0	32.26	3	8	3	0	0.142857143	32	0	0	2	1	4	0	0	0	0.37766091	0.116221038	0.116221038	-0.37766091	28	4	32	0.875	0.125	0
Bolander08b	N1(CCOCC1)C2=CC=C(/C=C/C3=CC(C4=CC=CC=C4)=C(/C=C/C5=CC=C(N6CCOCC6)C=C5)N=N3)C=C2	10.1021/jm300653b			2353.5	2353.5	4707		-5.628285797	ThR	t	f	Recombinant (E. Coli)	Recombinant human microtubule associated tau protein purified from E. coli was aggregated at a concentration of 5 μM with arachidonic acid (100 μM) in Tris 10 mM, pH 8, 24 h at 37 °C.		Fluorescence Displacement	Thiazine red was added at the concentration corresponding to the Kd of the respective aggregated protein binding site to induce a fluorescent signal that can be inhibited by the addition of a displacer compound. The assay was performed in Perkin-Elmer OptiPlate 384, black, 45 mL assay volume. As assay buffer, DPBS (no CaCl2, no MgCl2) (GIBCO N. 14020) was used. The tested compounds were dissolved…	InChI=1S/C34H34N4O2/c1-2-4-29(5-3-1)33-26-30(12-6-27-7-13-31(14-8-27)37-18-22-39-23-19-37)35-36-34(33)17-11-28-9-15-32(16-10-28)38-20-24-40-25-21-38/h1-17,26H,18-25H2/b12-6+,17-11+	InChI=1S/C34H34N4O2/c1-2-4-29(5-3-1)33-26-30(12-6-27-7-13-31(14-8-27)37-18-22-39-23-19-37)35-36-34(33)17-11-28-9-15-32(16-10-28)38-20-24-40-25-21-38/h1-17,26H,18-25H2/b12-6+,17-11+	530.672	6.1576	164.272	6	0	50.72	6	7	4	2	0.235294118	40	0	2	3	1	6	0	2	2	0.37777782	0.09358564	0.09358564	-0.37777782	34	6	40	0.85	0.15	0
Bolander08b	N1(CCOCC1)C2=CC=C(/C=C/C3=CC(C4=CC=CC=C4)=C(/C=C/C5=CC=C(N6CCOCC6)C=C5)N=N3)C=C2	10.1021/jm300653b			3795.5	3795.5	7591		-5.420731004	ThR	Ab40	f		Synthetic Aß40 was aggregated at a concentration of 50 μM with arachidonic acid (100 μM) in Tris 10 mM, pH 8, for 3 days at 37 °C, under shaking at 150 rpm.		Fluorescence Displacement	Thiazine red was added at the concentration corresponding to the Kd of the respective aggregated protein binding site to induce a fluorescent signal that can be inhibited by the addition of a displacer compound. The assay was performed in Perkin-Elmer OptiPlate 384, black, 45 mL assay volume. As assay buffer, DPBS (no CaCl2, no MgCl2) (GIBCO N. 14020) was used. The tested compounds were dissolved…	InChI=1S/C34H34N4O2/c1-2-4-29(5-3-1)33-26-30(12-6-27-7-13-31(14-8-27)37-18-22-39-23-19-37)35-36-34(33)17-11-28-9-15-32(16-10-28)38-20-24-40-25-21-38/h1-17,26H,18-25H2/b12-6+,17-11+	InChI=1S/C34H34N4O2/c1-2-4-29(5-3-1)33-26-30(12-6-27-7-13-31(14-8-27)37-18-22-39-23-19-37)35-36-34(33)17-11-28-9-15-32(16-10-28)38-20-24-40-25-21-38/h1-17,26H,18-25H2/b12-6+,17-11+	530.672	6.1576	164.272	6	0	50.72	6	7	4	2	0.235294118	40	0	2	3	1	6	0	2	2	0.37777782	0.09358564	0.09358564	-0.37777782	34	6	40	0.85	0.15	0
Bolander08d	CN(C)C(C=C1)=CC=C1/C=C/C(N=N2)=C(C3=CC=C(OC)C=C3)C=C2/C=C/C(C=C4)=CC=C4N(C)C	10.1021/jm300653b			795.5	795.5	1591		-6.099359816	ThR	t	f	Recombinant (E. Coli)	Recombinant human microtubule associated tau protein purified from E. coli was aggregated at a concentration of 5 μM with arachidonic acid (100 μM) in Tris 10 mM, pH 8, 24 h at 37 °C.		Fluorescence Displacement	Thiazine red was added at the concentration corresponding to the Kd of the respective aggregated protein binding site to induce a fluorescent signal that can be inhibited by the addition of a displacer compound. The assay was performed in Perkin-Elmer OptiPlate 384, black, 45 mL assay volume. As assay buffer, DPBS (no CaCl2, no MgCl2) (GIBCO N. 14020) was used. The tested compounds were dissolved…	InChI=1S/C31H32N4O/c1-34(2)27-15-7-23(8-16-27)6-14-26-22-30(25-12-19-29(36-5)20-13-25)31(33-32-26)21-11-24-9-17-28(18-10-24)35(3)4/h6-22H,1-5H3/b14-6+,21-11+	InChI=1S/C31H32N4O/c1-34(2)27-15-7-23(8-16-27)6-14-26-22-30(25-12-19-29(36-5)20-13-25)31(33-32-26)21-11-24-9-17-28(18-10-24)35(3)4/h6-22H,1-5H3/b14-6+,21-11+	476.624	6.625	153.414	5	0	41.49	4	8	4	0	0.161290323	36	0	0	3	1	5	0	0	0	0.496767818	0.118401326	0.118401326	-0.496767818	31	5	36	0.861111111	0.138888889	0
Bolander08d	CN(C)C(C=C1)=CC=C1/C=C/C(N=N2)=C(C3=CC=C(OC)C=C3)C=C2/C=C/C(C=C4)=CC=C4N(C)C	10.1021/jm300653b			2285.5	2285.5	4571		-5.641018774	ThR	Ab40	f		Synthetic Aß40 was aggregated at a concentration of 50 μM with arachidonic acid (100 μM) in Tris 10 mM, pH 8, for 3 days at 37 °C, under shaking at 150 rpm.		Fluorescence Displacement	Thiazine red was added at the concentration corresponding to the Kd of the respective aggregated protein binding site to induce a fluorescent signal that can be inhibited by the addition of a displacer compound. The assay was performed in Perkin-Elmer OptiPlate 384, black, 45 mL assay volume. As assay buffer, DPBS (no CaCl2, no MgCl2) (GIBCO N. 14020) was used. The tested compounds were dissolved…	InChI=1S/C31H32N4O/c1-34(2)27-15-7-23(8-16-27)6-14-26-22-30(25-12-19-29(36-5)20-13-25)31(33-32-26)21-11-24-9-17-28(18-10-24)35(3)4/h6-22H,1-5H3/b14-6+,21-11+	InChI=1S/C31H32N4O/c1-34(2)27-15-7-23(8-16-27)6-14-26-22-30(25-12-19-29(36-5)20-13-25)31(33-32-26)21-11-24-9-17-28(18-10-24)35(3)4/h6-22H,1-5H3/b14-6+,21-11+	476.624	6.625	153.414	5	0	41.49	4	8	4	0	0.161290323	36	0	0	3	1	5	0	0	0	0.496767818	0.118401326	0.118401326	-0.496767818	31	5	36	0.861111111	0.138888889	0
Bolander08e	CN(C)C(C=C1)=CC=C1/C=C/C(N=N2)=C(C3=C(F)C=CC=C3)C=C2/C=C/C(C=C4)=CC=C4N(C)C	10.1021/jm300653b			625.5	625.5	1251		-6.203772686	ThR	t	f	Recombinant (E. Coli)	Recombinant human microtubule associated tau protein purified from E. coli was aggregated at a concentration of 5 μM with arachidonic acid (100 μM) in Tris 10 mM, pH 8, 24 h at 37 °C.		Fluorescence Displacement	Thiazine red was added at the concentration corresponding to the Kd of the respective aggregated protein binding site to induce a fluorescent signal that can be inhibited by the addition of a displacer compound. The assay was performed in Perkin-Elmer OptiPlate 384, black, 45 mL assay volume. As assay buffer, DPBS (no CaCl2, no MgCl2) (GIBCO N. 14020) was used. The tested compounds were dissolved…	InChI=1S/C30H29FN4/c1-34(2)25-16-10-22(11-17-25)9-15-24-21-28(27-7-5-6-8-29(27)31)30(33-32-24)20-14-23-12-18-26(19-13-23)35(3)4/h5-21H,1-4H3/b15-9+,20-14+	InChI=1S/C30H29FN4/c1-34(2)25-16-10-22(11-17-25)9-15-24-21-28(27-7-5-6-8-29(27)31)30(33-32-24)20-14-23-12-18-26(19-13-23)35(3)4/h5-21H,1-4H3/b15-9+,20-14+	464.588	6.7555	146.82	4	0	32.26	4	7	4	0	0.133333333	35	0	0	3	1	5	0	0	0	0.37766091	0.130606234	0.130606234	-0.37766091	30	4	35	0.857142857	0.114285714	0
Bolander08e	CN(C)C(C=C1)=CC=C1/C=C/C(N=N2)=C(C3=C(F)C=CC=C3)C=C2/C=C/C(C=C4)=CC=C4N(C)C	10.1021/jm300653b			5033	5033	10066		-5.29817307	ThR	Ab40	f		Synthetic Aß40 was aggregated at a concentration of 50 μM with arachidonic acid (100 μM) in Tris 10 mM, pH 8, for 3 days at 37 °C, under shaking at 150 rpm.		Fluorescence Displacement	Thiazine red was added at the concentration corresponding to the Kd of the respective aggregated protein binding site to induce a fluorescent signal that can be inhibited by the addition of a displacer compound. The assay was performed in Perkin-Elmer OptiPlate 384, black, 45 mL assay volume. As assay buffer, DPBS (no CaCl2, no MgCl2) (GIBCO N. 14020) was used. The tested compounds were dissolved…	InChI=1S/C30H29FN4/c1-34(2)25-16-10-22(11-17-25)9-15-24-21-28(27-7-5-6-8-29(27)31)30(33-32-24)20-14-23-12-18-26(19-13-23)35(3)4/h5-21H,1-4H3/b15-9+,20-14+	InChI=1S/C30H29FN4/c1-34(2)25-16-10-22(11-17-25)9-15-24-21-28(27-7-5-6-8-29(27)31)30(33-32-24)20-14-23-12-18-26(19-13-23)35(3)4/h5-21H,1-4H3/b15-9+,20-14+	464.588	6.7555	146.82	4	0	32.26	4	7	4	0	0.133333333	35	0	0	3	1	5	0	0	0	0.37766091	0.130606234	0.130606234	-0.37766091	30	4	35	0.857142857	0.114285714	0
ThR	O=C1/C(C=C(S(=O)([O-])=O)C2=C1C=CC=C2)=N\N([H])C(C=C3)=CC=C3C4=NC5=CC=C(C)C(S(=O)([O-])=O)=C5S4	10.1021/jm300653b		18		18			-7.744727495		t	f	Recombinant (E. Coli)	Recombinant human microtubule associated tau protein purified from E. coli was aggregated at a concentration of 5 μM with arachidonic acid (100 μM) in Tris 10 mM, pH 8, 24 h at 37 °C.		Fluorescence Displacement	Thiazine red was added at the concentration corresponding to the Kd of the respective aggregated protein binding site to induce a fluorescent signal that can be inhibited by the addition of a displacer compound. The assay was performed in Perkin-Elmer OptiPlate 384, black, 45 mL assay volume. As assay buffer, DPBS (no CaCl2, no MgCl2) (GIBCO N. 14020) was used. The tested compounds were dissolved…	InChI=1S/C24H17N3O7S3/c1-13-6-11-18-22(23(13)37(32,33)34)35-24(25-18)14-7-9-15(10-8-14)26-27-19-12-20(36(29,30)31)16-4-2-3-5-17(16)21(19)28/h2-12,26H,1H3,(H,29,30,31)(H,32,33,34)/p-2/b27-19-	InChI=1S/C24H17N3O7S3/c1-13-6-11-18-22(23(13)37(32,33)34)35-24(25-18)14-7-9-15(10-8-14)26-27-19-12-20(36(29,30)31)16-4-2-3-5-17(16)21(19)28/h2-12,26H,1H3,(H,29,30,31)(H,32,33,34)/p-2/b27-19-	553.599	3.72632	137.2606	11	1	168.75	5	5	4	1	0.041666667	37	1	0	3	1	13	0	0	0	0.744018472	0.213340903	0.213340903	-0.744018472	24	13	37	0.648648649	0.351351351	0
ThR	O=C1/C(C=C(S(=O)([O-])=O)C2=C1C=CC=C2)=N\N([H])C(C=C3)=CC=C3C4=NC5=CC=C(C)C(S(=O)([O-])=O)=C5S4	10.1021/jm300653b		49		49			-7.30980392		Ab40	f		Synthetic Aß40 was aggregated at a concentration of 50 μM with arachidonic acid (100 μM) in Tris 10 mM, pH 8, for 3 days at 37 °C, under shaking at 150 rpm.		Fluorescence Displacement	Thiazine red was added at the concentration corresponding to the Kd of the respective aggregated protein binding site to induce a fluorescent signal that can be inhibited by the addition of a displacer compound. The assay was performed in Perkin-Elmer OptiPlate 384, black, 45 mL assay volume. As assay buffer, DPBS (no CaCl2, no MgCl2) (GIBCO N. 14020) was used. The tested compounds were dissolved…	InChI=1S/C24H17N3O7S3/c1-13-6-11-18-22(23(13)37(32,33)34)35-24(25-18)14-7-9-15(10-8-14)26-27-19-12-20(36(29,30)31)16-4-2-3-5-17(16)21(19)28/h2-12,26H,1H3,(H,29,30,31)(H,32,33,34)/p-2/b27-19-	InChI=1S/C24H17N3O7S3/c1-13-6-11-18-22(23(13)37(32,33)34)35-24(25-18)14-7-9-15(10-8-14)26-27-19-12-20(36(29,30)31)16-4-2-3-5-17(16)21(19)28/h2-12,26H,1H3,(H,29,30,31)(H,32,33,34)/p-2/b27-19-	553.599	3.72632	137.2606	11	1	168.75	5	5	4	1	0.041666667	37	1	0	3	1	13	0	0	0	0.744018472	0.213340903	0.213340903	-0.744018472	24	13	37	0.648648649	0.351351351	0
Bolander06d	CC(C)C1=CC=C(/C=C/C2=CN=C(/C=C/C3=CC=C(C(C)C)C=C3)C=N2)C=C1	10.1021/jm300653b			in	in	not determined			ThR	t	f	Recombinant (E. Coli)	Recombinant human microtubule associated tau protein purified from E. coli was aggregated at a concentration of 5 μM with arachidonic acid (100 μM) in Tris 10 mM, pH 8, 24 h at 37 °C.		Fluorescence Displacement	Thiazine red was added at the concentration corresponding to the Kd of the respective aggregated protein binding site to induce a fluorescent signal that can be inhibited by the addition of a displacer compound. The assay was performed in Perkin-Elmer OptiPlate 384, black, 45 mL assay volume. As assay buffer, DPBS (no CaCl2, no MgCl2) (GIBCO N. 14020) was used. The tested compounds were dissolved…	InChI=1S/C26H28N2/c1-19(2)23-11-5-21(6-12-23)9-15-25-17-28-26(18-27-25)16-10-22-7-13-24(14-8-22)20(3)4/h5-20H,1-4H3/b15-9+,16-10+	InChI=1S/C26H28N2/c1-19(2)23-11-5-21(6-12-23)9-15-25-17-28-26(18-27-25)16-10-22-7-13-24(14-8-22)20(3)4/h5-20H,1-4H3/b15-9+,16-10+	368.524	7.0642	120.95	2	0	25.78	3	6	3	0	0.230769231	28	0	0	2	1	2	0	0	0	0.253018259	0.081316087	0.081316087	-0.253018259	26	2	28	0.928571429	0.071428571	0
Bolander06d	CC(C)C1=CC=C(/C=C/C2=CN=C(/C=C/C3=CC=C(C(C)C)C=C3)C=N2)C=C1	10.1021/jm300653b			in	in	not determined			ThR	Ab40	f		Synthetic Aß40 was aggregated at a concentration of 50 μM with arachidonic acid (100 μM) in Tris 10 mM, pH 8, for 3 days at 37 °C, under shaking at 150 rpm.		Fluorescence Displacement	Thiazine red was added at the concentration corresponding to the Kd of the respective aggregated protein binding site to induce a fluorescent signal that can be inhibited by the addition of a displacer compound. The assay was performed in Perkin-Elmer OptiPlate 384, black, 45 mL assay volume. As assay buffer, DPBS (no CaCl2, no MgCl2) (GIBCO N. 14020) was used. The tested compounds were dissolved…	InChI=1S/C26H28N2/c1-19(2)23-11-5-21(6-12-23)9-15-25-17-28-26(18-27-25)16-10-22-7-13-24(14-8-22)20(3)4/h5-20H,1-4H3/b15-9+,16-10+	InChI=1S/C26H28N2/c1-19(2)23-11-5-21(6-12-23)9-15-25-17-28-26(18-27-25)16-10-22-7-13-24(14-8-22)20(3)4/h5-20H,1-4H3/b15-9+,16-10+	368.524	7.0642	120.95	2	0	25.78	3	6	3	0	0.230769231	28	0	0	2	1	2	0	0	0	0.253018259	0.081316087	0.081316087	-0.253018259	26	2	28	0.928571429	0.071428571	0
Bolander07b	N1(CCOCC1)C2=CC=C(/C=C/C3=CC(/C=C/C4=CC=C(N5CCOCC5)C=C4)=NC=N3)C=C2	10.1021/jm300653b			in	in	not determined			ThR	t	f	Recombinant (E. Coli)	Recombinant human microtubule associated tau protein purified from E. coli was aggregated at a concentration of 5 μM with arachidonic acid (100 μM) in Tris 10 mM, pH 8, 24 h at 37 °C.		Fluorescence Displacement	Thiazine red was added at the concentration corresponding to the Kd of the respective aggregated protein binding site to induce a fluorescent signal that can be inhibited by the addition of a displacer compound. The assay was performed in Perkin-Elmer OptiPlate 384, black, 45 mL assay volume. As assay buffer, DPBS (no CaCl2, no MgCl2) (GIBCO N. 14020) was used. The tested compounds were dissolved…	InChI=1S/C28H30N4O2/c1(23-3-9-27(10-4-23)31-13-17-33-18-14-31)7-25-21-26(30-22-29-25)8-2-24-5-11-28(12-6-24)32-15-19-34-20-16-32/h1-12,21-22H,13-20H2/b7-1+,8-2+	InChI=1S/C28H30N4O2/c1(23-3-9-27(10-4-23)31-13-17-33-18-14-31)7-25-21-26(30-22-29-25)8-2-24-5-11-28(12-6-24)32-15-19-34-20-16-32/h1-12,21-22H,13-20H2/b7-1+,8-2+	454.574	4.4906	138.836	6	0	50.72	5	6	3	2	0.285714286	34	0	2	2	1	6	0	2	2	0.37777782	0.116221044	0.116221044	-0.37777782	28	6	34	0.823529412	0.176470588	0
Bolander07b	N1(CCOCC1)C2=CC=C(/C=C/C3=CC(/C=C/C4=CC=C(N5CCOCC5)C=C4)=NC=N3)C=C2	10.1021/jm300653b			in	in	not determined			ThR	Ab40	f		Synthetic Aß40 was aggregated at a concentration of 50 μM with arachidonic acid (100 μM) in Tris 10 mM, pH 8, for 3 days at 37 °C, under shaking at 150 rpm.		Fluorescence Displacement	Thiazine red was added at the concentration corresponding to the Kd of the respective aggregated protein binding site to induce a fluorescent signal that can be inhibited by the addition of a displacer compound. The assay was performed in Perkin-Elmer OptiPlate 384, black, 45 mL assay volume. As assay buffer, DPBS (no CaCl2, no MgCl2) (GIBCO N. 14020) was used. The tested compounds were dissolved…	InChI=1S/C28H30N4O2/c1(23-3-9-27(10-4-23)31-13-17-33-18-14-31)7-25-21-26(30-22-29-25)8-2-24-5-11-28(12-6-24)32-15-19-34-20-16-32/h1-12,21-22H,13-20H2/b7-1+,8-2+	InChI=1S/C28H30N4O2/c1(23-3-9-27(10-4-23)31-13-17-33-18-14-31)7-25-21-26(30-22-29-25)8-2-24-5-11-28(12-6-24)32-15-19-34-20-16-32/h1-12,21-22H,13-20H2/b7-1+,8-2+	454.574	4.4906	138.836	6	0	50.72	5	6	3	2	0.285714286	34	0	2	2	1	6	0	2	2	0.37777782	0.116221044	0.116221044	-0.37777782	28	6	34	0.823529412	0.176470588	0
Bolander08a	CN(C)C(C=C1)=CC=C1/C=C/C(N=N2)=C(C3=CC=CC=C3)C=C2/C=C/C(C=C4)=CC=C4N(C)C	10.1021/jm300653b			in	in	not determined			ThR	t	f	Recombinant (E. Coli)	Recombinant human microtubule associated tau protein purified from E. coli was aggregated at a concentration of 5 μM with arachidonic acid (100 μM) in Tris 10 mM, pH 8, 24 h at 37 °C.		Fluorescence Displacement	Thiazine red was added at the concentration corresponding to the Kd of the respective aggregated protein binding site to induce a fluorescent signal that can be inhibited by the addition of a displacer compound. The assay was performed in Perkin-Elmer OptiPlate 384, black, 45 mL assay volume. As assay buffer, DPBS (no CaCl2, no MgCl2) (GIBCO N. 14020) was used. The tested compounds were dissolved…	InChI=1S/C30H30N4/c1-33(2)27-17-11-23(12-18-27)10-16-26-22-29(25-8-6-5-7-9-25)30(32-31-26)21-15-24-13-19-28(20-14-24)34(3)4/h5-22H,1-4H3/b16-10+,21-15+	InChI=1S/C30H30N4/c1-33(2)27-17-11-23(12-18-27)10-16-26-22-29(25-8-6-5-7-9-25)30(32-31-26)21-15-24-13-19-28(20-14-24)34(3)4/h5-22H,1-4H3/b16-10+,21-15+	446.598	6.6164	146.862	4	0	32.26	4	7	4	0	0.133333333	34	0	0	3	1	4	0	0	0	0.37766091	0.09358564	0.09358564	-0.37766091	30	4	34	0.882352941	0.117647059	0
Bolander08a	CN(C)C(C=C1)=CC=C1/C=C/C(N=N2)=C(C3=CC=CC=C3)C=C2/C=C/C(C=C4)=CC=C4N(C)C	10.1021/jm300653b			in	in	not determined			ThR	Ab40	f		Synthetic Aß40 was aggregated at a concentration of 50 μM with arachidonic acid (100 μM) in Tris 10 mM, pH 8, for 3 days at 37 °C, under shaking at 150 rpm.		Fluorescence Displacement	Thiazine red was added at the concentration corresponding to the Kd of the respective aggregated protein binding site to induce a fluorescent signal that can be inhibited by the addition of a displacer compound. The assay was performed in Perkin-Elmer OptiPlate 384, black, 45 mL assay volume. As assay buffer, DPBS (no CaCl2, no MgCl2) (GIBCO N. 14020) was used. The tested compounds were dissolved…	InChI=1S/C30H30N4/c1-33(2)27-17-11-23(12-18-27)10-16-26-22-29(25-8-6-5-7-9-25)30(32-31-26)21-15-24-13-19-28(20-14-24)34(3)4/h5-22H,1-4H3/b16-10+,21-15+	InChI=1S/C30H30N4/c1-33(2)27-17-11-23(12-18-27)10-16-26-22-29(25-8-6-5-7-9-25)30(32-31-26)21-15-24-13-19-28(20-14-24)34(3)4/h5-22H,1-4H3/b16-10+,21-15+	446.598	6.6164	146.862	4	0	32.26	4	7	4	0	0.133333333	34	0	0	3	1	4	0	0	0	0.37766091	0.09358564	0.09358564	-0.37766091	30	4	34	0.882352941	0.117647059	0
Bolander08c	CN1C=CC=C1/C=C/C2=CC(C3=CC=CC=C3)=C(/C=C/C4=CC=CN4C)N=N2	10.1021/jm300653b			in	in	not determined			ThR	t	f	Recombinant (E. Coli)	Recombinant human microtubule associated tau protein purified from E. coli was aggregated at a concentration of 5 μM with arachidonic acid (100 μM) in Tris 10 mM, pH 8, 24 h at 37 °C.		Fluorescence Displacement	Thiazine red was added at the concentration corresponding to the Kd of the respective aggregated protein binding site to induce a fluorescent signal that can be inhibited by the addition of a displacer compound. The assay was performed in Perkin-Elmer OptiPlate 384, black, 45 mL assay volume. As assay buffer, DPBS (no CaCl2, no MgCl2) (GIBCO N. 14020) was used. The tested compounds were dissolved…	InChI=1S/C24H22N4/c1-27-16-6-10-21(27)13-12-20-18-23(19-8-4-3-5-9-19)24(26-25-20)15-14-22-11-7-17-28(22)2/h3-18H,1-2H3/b13-12+,15-14+	InChI=1S/C24H22N4/c1-27-16-6-10-21(27)13-12-20-18-23(19-8-4-3-5-9-19)24(26-25-20)15-14-22-11-7-17-28(22)2/h3-18H,1-2H3/b13-12+,15-14+	366.468	5.1614	116.15	4	0	35.64	4	5	4	0	0.083333333	28	0	0	1	3	4	0	0	0	0.351055058	0.09364038	0.09364038	-0.351055058	24	4	28	0.857142857	0.142857143	0
Bolander08c	CN1C=CC=C1/C=C/C2=CC(C3=CC=CC=C3)=C(/C=C/C4=CC=CN4C)N=N2	10.1021/jm300653b			in	in	not determined			ThR	Ab40	f		Synthetic Aß40 was aggregated at a concentration of 50 μM with arachidonic acid (100 μM) in Tris 10 mM, pH 8, for 3 days at 37 °C, under shaking at 150 rpm.		Fluorescence Displacement	Thiazine red was added at the concentration corresponding to the Kd of the respective aggregated protein binding site to induce a fluorescent signal that can be inhibited by the addition of a displacer compound. The assay was performed in Perkin-Elmer OptiPlate 384, black, 45 mL assay volume. As assay buffer, DPBS (no CaCl2, no MgCl2) (GIBCO N. 14020) was used. The tested compounds were dissolved…	InChI=1S/C24H22N4/c1-27-16-6-10-21(27)13-12-20-18-23(19-8-4-3-5-9-19)24(26-25-20)15-14-22-11-7-17-28(22)2/h3-18H,1-2H3/b13-12+,15-14+	InChI=1S/C24H22N4/c1-27-16-6-10-21(27)13-12-20-18-23(19-8-4-3-5-9-19)24(26-25-20)15-14-22-11-7-17-28(22)2/h3-18H,1-2H3/b13-12+,15-14+	366.468	5.1614	116.15	4	0	35.64	4	5	4	0	0.083333333	28	0	0	1	3	4	0	0	0	0.351055058	0.09364038	0.09364038	-0.351055058	24	4	28	0.857142857	0.142857143	0
Boukherrouba2022-11e	O=C1C2=CC=CC(O)=C2C/C1=C\C3=CC=CC=C3	10.1016/j.ejmech.2022.114139			nb	nb				ThT	t	f		Not specified		Fluorescence Displacement	Not specified	InChI=1S/C16H12O2/c17-15-8-4-7-13-14(15)10-12(16(13)18)9-11-5-2-1-3-6-11/h1-9,17H,10H2/b12-9+	InChI=1S/C16H12O2/c17-15-8-4-7-13-14(15)10-12(16(13)18)9-11-5-2-1-3-6-11/h1-9,17H,10H2/b12-9+	236.27	3.2146	70.5603	2	1	37.3	3	1	2	1	0.0625	18	1	0	2	0	2	0	0	0	0.507638247	0.189293812	0.189293812	-0.507638247	16	2	18	0.888888889	0.111111111	0
Boukherrouba2022-11f	O=C1C2=CC=CC(O)=C2C/C1=C\C3=CC(O)=CC=C3	10.1016/j.ejmech.2022.114139			nb	nb				ThT	t	f		Not specified		Fluorescence Displacement	Not specified	InChI=1S/C16H12O3/c17-12-4-1-3-10(8-12)7-11-9-14-13(16(11)19)5-2-6-15(14)18/h1-8,17-18H,9H2/b11-7+	InChI=1S/C16H12O3/c17-12-4-1-3-10(8-12)7-11-9-14-13(16(11)19)5-2-6-15(14)18/h1-8,17-18H,9H2/b11-7+	252.269	2.9202	72.2251	3	2	57.53	3	1	2	1	0.0625	19	1	0	2	0	3	0	0	0	0.507944273	0.189293829	0.189293829	-0.507944273	16	3	19	0.842105263	0.157894737	0
Boukherrouba2022-13a	O=C1C2=CC=CC=C2C/C1=C\C3=CC(O)=C(O)C(O)=C3	10.1016/j.ejmech.2022.114139			42	42		5	-7.37675071	ThT	t	f		Not specified		Fluorescence Displacement	Not specified	InChI=1S/C16H12O4/c17-13-6-9(7-14(18)16(13)20)5-11-8-10-3-1-2-4-12(10)15(11)19/h1-7,17-18,20H,8H2/b11-5+	InChI=1S/C16H12O4/c17-13-6-9(7-14(18)16(13)20)5-11-8-10-3-1-2-4-12(10)15(11)19/h1-7,17-18,20H,8H2/b11-5+	268.268	2.6258	73.8899	4	3	77.76	3	1	2	1	0.0625	20	1	0	2	0	4	0	0	0	0.504146706	0.199796506	0.199796506	-0.504146706	16	4	20	0.8	0.2	0
Boukherrouba2022-13b	O=C1C2=CC=CC(O)=C2C/C1=C\C3=CC(O)=C(O)C(O)=C3	10.1016/j.ejmech.2022.114139			78	78		9	-7.107905397	ThT	t	f		Not specified		Fluorescence Displacement	Not specified	InChI=1S/C16H12O5/c17-12-3-1-2-10-11(12)7-9(15(10)20)4-8-5-13(18)16(21)14(19)6-8/h1-6,17-19,21H,7H2/b9-4+	InChI=1S/C16H12O5/c17-12-3-1-2-10-11(12)7-9(15(10)20)4-8-5-13(18)16(21)14(19)6-8/h1-6,17-19,21H,7H2/b9-4+	284.267	2.3314	75.5547	5	4	97.99	3	1	2	1	0.0625	21	1	0	2	0	5	0	0	0	0.507638247	0.199796506	0.199796506	-0.507638247	16	5	21	0.761904762	0.238095238	0
Boukherrouba2022-13m	O=C1C2=C(O)C=C(O)C=C2C/C1=C\C3=C(O)C=C(O)C=C3	10.1016/j.ejmech.2022.114139			76	76		3	-7.119186408	ThT	t	f		Not specified		Fluorescence Displacement	Not specified	InChI=1S/C16H12O5/c17-11-2-1-8(13(19)6-11)3-10-4-9-5-12(18)7-14(20)15(9)16(10)21/h1-3,5-7,17-20H,4H2/b10-3+	InChI=1S/C16H12O5/c17-11-2-1-8(13(19)6-11)3-10-4-9-5-12(18)7-14(20)15(9)16(10)21/h1-3,5-7,17-20H,4H2/b10-3+	284.267	2.3314	75.5547	5	4	97.99	3	1	2	1	0.0625	21	1	0	2	0	5	0	0	0	0.507822556	0.19288299	0.19288299	-0.507822556	16	5	21	0.761904762	0.238095238	0
Boukherrouba2022-13n	O=C1C2=C(O)C=C(O)C=C2C/C1=C\C3=CC(O)=C(O)C=C3	10.1016/j.ejmech.2022.114139			65	65		10	-7.187086643	ThT	t	f		Not specified		Fluorescence Displacement	Not specified	InChI=1S/C16H12O5/c17-11-6-9-5-10(16(21)15(9)14(20)7-11)3-8-1-2-12(18)13(19)4-8/h1-4,6-7,17-20H,5H2/b10-3+	InChI=1S/C16H12O5/c17-11-6-9-5-10(16(21)15(9)14(20)7-11)3-8-1-2-12(18)13(19)4-8/h1-4,6-7,17-20H,5H2/b10-3+	284.267	2.3314	75.5547	5	4	97.99	3	1	2	1	0.0625	21	1	0	2	0	5	0	0	0	0.507811692	0.192880711	0.192880711	-0.507811692	16	5	21	0.761904762	0.238095238	0
Boukherrouba2022-13o	O=C1C2=C(O)C=C(O)C=C2C/C1=C\C3=CC(O)=C(O)C(O)=C3	10.1016/j.ejmech.2022.114139			90	90		5	-7.045757491	ThT	t	f		Not specified		Fluorescence Displacement	Not specified	InChI=1S/C16H12O6/c17-10-5-8-4-9(15(21)14(8)11(18)6-10)1-7-2-12(19)16(22)13(20)3-7/h1-3,5-6,17-20,22H,4H2/b9-1+	InChI=1S/C16H12O6/c17-10-5-8-4-9(15(21)14(8)11(18)6-10)1-7-2-12(19)16(22)13(20)3-7/h1-3,5-6,17-20,22H,4H2/b9-1+	300.266	2.037	77.2195	6	5	118.22	3	1	2	1	0.0625	22	1	0	2	0	6	0	0	0	0.507811692	0.199796506	0.199796506	-0.507811692	16	6	22	0.727272727	0.272727273	0
Boukherrouba2022-12e	O=C1C2=CC=CC(O)=C2O/C1=C\C3=CC=CC=C3	10.1016/j.ejmech.2022.114139			22	22		4	-7.657577319	ThT	t	f		Not specified		Fluorescence Displacement	Not specified	InChI=1S/C15H10O3/c16-12-8-4-7-11-14(17)13(18-15(11)12)9-10-5-2-1-3-6-10/h1-9,16H/b13-9-	InChI=1S/C15H10O3/c16-12-8-4-7-11-14(17)13(18-15(11)12)9-10-5-2-1-3-6-10/h1-9,16H/b13-9-	238.242	3.0084	67.4843	3	1	46.53	3	1	2	1	0	18	0	1	2	0	3	0	0	0	0.504221656	0.231616153	0.231616153	-0.504221656	15	3	18	0.833333333	0.166666667	0
Boukherrouba2022-12f	O=C1C2=CC=CC(O)=C2O/C1=C\C3=CC(O)=CC=C3	10.1016/j.ejmech.2022.114139			45	45		9	-7.346787486	ThT	t	f		Not specified		Fluorescence Displacement	Not specified	InChI=1S/C15H10O4/c16-10-4-1-3-9(7-10)8-13-14(18)11-5-2-6-12(17)15(11)19-13/h1-8,16-17H/b13-8-	InChI=1S/C15H10O4/c16-10-4-1-3-9(7-10)8-13-14(18)11-5-2-6-12(17)15(11)19-13/h1-8,16-17H/b13-8-	254.241	2.714	69.1491	4	2	66.76	3	1	2	1	0	19	0	1	2	0	4	0	0	0	0.507944255	0.231616172	0.231616172	-0.507944255	15	4	19	0.789473684	0.210526316	0
Boukherrouba2022-14a	O=C1C2=CC=CC=C2O/C1=C\C3=CC(O)=C(O)C(O)=C3	10.1016/j.ejmech.2022.114139			70	70		9	-7.15490196	ThT	t	f		Not specified		Fluorescence Displacement	Not specified	InChI=1S/C15H10O5/c16-10-5-8(6-11(17)15(10)19)7-13-14(18)9-3-1-2-4-12(9)20-13/h1-7,16-17,19H/b13-7-	InChI=1S/C15H10O5/c16-10-5-8(6-11(17)15(10)19)7-13-14(18)9-3-1-2-4-12(9)20-13/h1-7,16-17,19H/b13-7-	270.24	2.4196	70.8139	5	3	86.99	3	1	2	1	0	20	0	1	2	0	5	0	0	0	0.504146695	0.231464453	0.231464453	-0.504146695	15	5	20	0.75	0.25	0
Boukherrouba2022-14b	O=C1C2=CC=CC(O)=C2O/C1=C\C3=CC(O)=C(O)C(O)=C3	10.1016/j.ejmech.2022.114139			88	88		11	-7.055517328	ThT	t	f		Not specified		Fluorescence Displacement	Not specified	InChI=1S/C15H10O6/c16-9-3-1-2-8-13(19)12(21-15(8)9)6-7-4-10(17)14(20)11(18)5-7/h1-6,16-18,20H/b12-6-	InChI=1S/C15H10O6/c16-9-3-1-2-8-13(19)12(21-15(8)9)6-7-4-10(17)14(20)11(18)5-7/h1-6,16-18,20H/b12-6-	286.239	2.1252	72.4787	6	4	107.22	3	1	2	1	0	21	0	1	2	0	6	0	0	0	0.504221656	0.231616192	0.231616192	-0.504221656	15	6	21	0.714285714	0.285714286	0
Boukherrouba2022-14m	O=C1C2=C(O)C=C(O)C=C2O/C1=C\C3=C(O)C=C(O)C=C3	10.1016/j.ejmech.2022.114139			89	89		6	-7.050609993	ThT	t	f		Not specified		Fluorescence Displacement	Not specified	InChI=1S/C15H10O6/c16-8-2-1-7(10(18)4-8)3-13-15(20)14-11(19)5-9(17)6-12(14)21-13/h1-6,16-19H/b13-3-	InChI=1S/C15H10O6/c16-8-2-1-7(10(18)4-8)3-13-15(20)14-11(19)5-9(17)6-12(14)21-13/h1-6,16-19H/b13-3-	286.239	2.1252	72.4787	6	4	107.22	3	1	2	1	0	21	0	1	2	0	6	0	0	0	0.507822556	0.235226797	0.235226797	-0.507822556	15	6	21	0.714285714	0.285714286	0
Boukherrouba2022-14n	O=C1C2=C(O)C=C(O)C=C2O/C1=C\C3=CC(O)=C(O)C=C3	10.1016/j.ejmech.2022.114139			85	85		6	-7.070581074	ThT	t	f		Not specified		Fluorescence Displacement	Not specified	InChI=1S/C15H10O6/c16-8-5-11(19)14-12(6-8)21-13(15(14)20)4-7-1-2-9(17)10(18)3-7/h1-6,16-19H/b13-4-	InChI=1S/C15H10O6/c16-8-5-11(19)14-12(6-8)21-13(15(14)20)4-7-1-2-9(17)10(18)3-7/h1-6,16-19H/b13-4-	286.239	2.1252	72.4787	6	4	107.22	3	1	2	1	0	21	0	1	2	0	6	0	0	0	0.507678166	0.235224366	0.235224366	-0.507678166	15	6	21	0.714285714	0.285714286	0
Boukherrouba2022-14o	O=C1C2=C(O)C=C(O)C=C2O/C1=C\C3=CC(O)=C(O)C(O)=C3	10.1016/j.ejmech.2022.114139			94	94		5	-7.026872146	ThT	t	f		Not specified		Fluorescence Displacement	Not specified	InChI=1S/C15H10O7/c16-7-4-8(17)13-11(5-7)22-12(15(13)21)3-6-1-9(18)14(20)10(19)2-6/h1-5,16-20H/b12-3-	InChI=1S/C15H10O7/c16-7-4-8(17)13-11(5-7)22-12(15(13)21)3-6-1-9(18)14(20)10(19)2-6/h1-5,16-20H/b12-3-	302.238	1.8308	74.1435	7	5	127.45	3	1	2	1	0	22	0	1	2	0	7	0	0	0	0.507678166	0.235224385	0.235224385	-0.507678166	15	7	22	0.681818182	0.318181818	0
Byeon2007-3e	CS(C1=CC(S2)=C(C=C1)N=C2NCCNC3=NC4=C(C=C(S(C)(=O)=O)C=C4)S3)(=O)=O	10.1016/j.bmcl.2007.04.079			>10	>10				[125I]TZDM	Ab42	f		Not specified		Radioligand Displacement	Not specified	InChI=1S/C18H18N4O4S4/c1-29(23,24)11-3-5-13-15(9-11)27-17(21-13)19-7-8-20-18-22-14-6-4-12(30(2,25)26)10-16(14)28-18/h3-6,9-10H,7-8H2,1-2H3,(H,19,21)(H,20,22)	InChI=1S/C18H18N4O4S4/c1-29(23,24)11-3-5-13-15(9-11)27-17(21-13)19-7-8-20-18-22-14-6-4-12(30(2,25)26)10-16(14)28-18/h3-6,9-10H,7-8H2,1-2H3,(H,19,21)(H,20,22)	482.634	3.237	122.439	10	2	118.12	4	7	4	0	0.222222222	30	0	0	2	2	12	0	0	0	0.359718325	0.183354166	0.183354166	-0.359718325	18	12	30	0.6	0.4	0
FA dimer	OC(/C=C/C(C=C1OC)=CC=C1OCCOC2=CC=C(/C=C/C(O)=O)C=C2OC)=O	10.1016/j.bmcl.2007.04.079			0.6	0.6			-9.22184875	[125I]TZDM	Ab42	f		Not specified		Radioligand Displacement	Not specified	InChI=1S/C22H22O8/c1-27-19-13-15(5-9-21(23)24)3-7-17(19)29-11-12-30-18-8-4-16(6-10-22(25)26)14-20(18)28-2/h3-10,13-14H,11-12H2,1-2H3,(H,23,24)(H,25,26)/b9-5+,10-6+	InChI=1S/C22H22O8/c1-27-19-13-15(5-9-21(23)24)3-7-17(19)29-11-12-30-18-8-4-16(6-10-22(25)26)14-20(18)28-2/h3-10,13-14H,11-12H2,1-2H3,(H,23,24)(H,25,26)/b9-5+,10-6+	414.41	3.3572	110.3176	6	2	111.52	2	11	2	0	0.181818182	30	0	0	2	0	8	0	0	0	0.492847018	0.327821203	0.327821203	-0.492847018	22	8	30	0.733333333	0.266666667	0
Byeon2007-1a	OC(/C=C/C(C=C1OC)=CC=C1N(C)CCN(C)C2=CC=C(/C=C/C(O)=O)C=C2OC)=O	10.1016/j.bmcl.2007.04.079			0.72	0.72			-9.142667504	[125I]TZDM	Ab42	f		Not specified		Radioligand Displacement	Not specified	InChI=1S/C24H28N2O6/c1-25(19-9-5-17(7-11-23(27)28)15-21(19)31-3)13-14-26(2)20-10-6-18(8-12-24(29)30)16-22(20)32-4/h5-12,15-16H,13-14H2,1-4H3,(H,27,28)(H,29,30)/b11-7+,12-8+	InChI=1S/C24H28N2O6/c1-25(19-9-5-17(7-11-23(27)28)15-21(19)31-3)13-14-26(2)20-10-6-18(8-12-24(29)30)16-22(20)32-4/h5-12,15-16H,13-14H2,1-4H3,(H,27,28)(H,29,30)/b11-7+,12-8+	440.496	3.472	125.8676	6	2	99.54	2	11	2	0	0.25	32	0	0	2	0	8	0	0	0	0.494563575	0.327821203	0.327821203	-0.494563575	24	8	32	0.75	0.25	0
Byeon2007-1b	OC(/C=C/C(C=C1OC)=CC=C1N(CC2)CCN2C3=CC=C(/C=C/C(O)=O)C=C3OC)=O	10.1016/j.bmcl.2007.04.079			1.36	1.36			-8.866461092	[125I]TZDM	Ab42	f		Not specified		Radioligand Displacement	Not specified	InChI=1S/C24H26N2O6/c1-31-21-15-17(5-9-23(27)28)3-7-19(21)25-11-13-26(14-12-25)20-8-4-18(6-10-24(29)30)16-22(20)32-2/h3-10,15-16H,11-14H2,1-2H3,(H,27,28)(H,29,30)/b9-5+,10-6+	InChI=1S/C24H26N2O6/c1-31-21-15-17(5-9-23(27)28)3-7-19(21)25-11-13-26(14-12-25)20-8-4-18(6-10-24(29)30)16-22(20)32-2/h3-10,15-16H,11-14H2,1-2H3,(H,27,28)(H,29,30)/b9-5+,10-6+	438.48	3.226	123.7536	6	2	99.54	3	8	2	1	0.25	32	0	1	2	0	8	0	1	1	0.494563384	0.327821203	0.327821203	-0.494563384	24	8	32	0.75	0.25	0
Byeon2007-2a	O=C(O)/C=C/C1=CC(OC)=C(C=C1)OCCOC2=C(OC)C=C(N(C)C)C=C2	10.1016/j.bmcl.2007.04.079			1	1			-9	[125I]TZDM	Ab42	f		Not specified		Radioligand Displacement	Not specified	InChI=1S/C21H25NO6/c1-22(2)16-7-9-18(20(14-16)26-4)28-12-11-27-17-8-5-15(6-10-21(23)24)13-19(17)25-3/h5-10,13-14H,11-12H2,1-4H3,(H,23,24)/b10-6+	InChI=1S/C21H25NO6/c1-22(2)16-7-9-18(20(14-16)26-4)28-12-11-27-17-8-5-15(6-10-21(23)24)13-19(17)25-3/h5-10,13-14H,11-12H2,1-4H3,(H,23,24)/b10-6+	387.432	3.3254	107.9748	6	1	77.46	2	10	2	0	0.285714286	28	0	0	2	0	7	0	0	0	0.492847018	0.327821203	0.327821203	-0.492847018	21	7	28	0.75	0.25	0
Byeon2007-2b	O=C(O)/C=C/C1=CC(OC)=C(C=C1)OCCOC2=C(OC)C=C(N(CC(O)=O)CC(O)=O)C=C2	10.1016/j.bmcl.2007.04.079			0.57	0.57			-9.244125144	[125I]TZDM	Ab42	f		Not specified		Radioligand Displacement	Not specified	InChI=1S/C23H25NO10/c1-31-19-11-15(4-8-21(25)26)3-6-17(19)33-9-10-34-18-7-5-16(12-20(18)32-2)24(13-22(27)28)14-23(29)30/h3-8,11-12H,9-10,13-14H2,1-2H3,(H,25,26)(H,27,28)(H,29,30)/b8-4+	InChI=1S/C23H25NO10/c1-31-19-11-15(4-8-21(25)26)3-6-17(19)33-9-10-34-18-7-5-16(12-20(18)32-2)24(13-22(27)28)14-23(29)30/h3-8,11-12H,9-10,13-14H2,1-2H3,(H,25,26)(H,27,28)(H,29,30)/b8-4+	475.45	2.235	121.1324	8	3	152.06	2	14	2	0	0.260869565	34	0	0	2	0	11	0	0	0	0.492847018	0.327821203	0.327821203	-0.492847018	23	11	34	0.676470588	0.323529412	0
Byeon2007-2c	O=C(O)/C=C/C1=CC(OC)=C(C=C1Br)OCCOC2=C(OC)C=C(N(C)C)C=C2	10.1016/j.bmcl.2007.04.079			0.83	0.83			-9.080921908	[125I]TZDM	Ab42	f		Not specified		Radioligand Displacement	Not specified	InChI=1S/C21H24BrNO6/c1-23(2)15-6-7-17(19(12-15)27-4)28-9-10-29-20-13-16(22)14(5-8-21(24)25)11-18(20)26-3/h5-8,11-13H,9-10H2,1-4H3,(H,24,25)/b8-5+	InChI=1S/C21H24BrNO6/c1-23(2)15-6-7-17(19(12-15)27-4)28-9-10-29-20-13-16(22)14(5-8-21(24)25)11-18(20)26-3/h5-8,11-13H,9-10H2,1-4H3,(H,24,25)/b8-5+	466.328	4.0879	115.6748	6	1	77.46	2	10	2	0	0.285714286	29	0	0	2	0	8	0	0	0	0.492845574	0.327821868	0.327821868	-0.492845574	21	7	29	0.724137931	0.24137931	0
Byeon2007-2d	O=C(O)/C=C/C1=CC(OC)=C(C(Br)=C1)OCCOC2=C(OC)C=C(N(C)C)C=C2	10.1016/j.bmcl.2007.04.079			1.32	1.32			-8.879426069	[125I]TZDM	Ab42	f		Not specified		Radioligand Displacement	Not specified	InChI=1S/C21H24BrNO6/c1-23(2)15-6-7-17(18(13-15)26-3)28-9-10-29-21-16(22)11-14(5-8-20(24)25)12-19(21)27-4/h5-8,11-13H,9-10H2,1-4H3,(H,24,25)/b8-5+	InChI=1S/C21H24BrNO6/c1-23(2)15-6-7-17(18(13-15)26-3)28-9-10-29-21-16(22)11-14(5-8-20(24)25)12-19(21)27-4/h5-8,11-13H,9-10H2,1-4H3,(H,24,25)/b8-5+	466.328	4.0879	115.6748	6	1	77.46	2	10	2	0	0.285714286	29	0	0	2	0	8	0	0	0	0.492801825	0.327821208	0.327821208	-0.492801825	21	7	29	0.724137931	0.24137931	0
FA	OC1=C(OC)C=C(/C=C/C(O)=O)C=C1	10.1016/j.bmcl.2007.04.079			0.77	0.77			-9.113509275	[125I]TZDM	Ab42	f		Not specified		Radioligand Displacement	Not specified	InChI=1S/C10H10O4/c1-14-9-6-7(2-4-8(9)11)3-5-10(12)13/h2-6,11H,1H3,(H,12,13)/b5-3+	InChI=1S/C10H10O4/c1-14-9-6-7(2-4-8(9)11)3-5-10(12)13/h2-6,11H,1H3,(H,12,13)/b5-3+	194.186	1.4986	51.3286	3	2	66.76	1	3	1	0	0.1	14	0	0	1	0	4	0	0	0	0.504254344	0.327821203	0.327821203	-0.504254344	10	4	14	0.714285714	0.285714286	0
Byeon2007-3a	C1(NCCNC2=NC(C=CC=C3)=C3S2)=NC4=C(C=CC=C4)S1	10.1016/j.bmcl.2007.04.079			0.71	0.71			-9.148741651	[125I]TZDM	Ab42	f		Not specified		Radioligand Displacement	Not specified	InChI=1S/C16H14N4S2/c1-3-7-13-11(5-1)19-15(21-13)17-9-10-18-16-20-12-6-2-4-8-14(12)22-16/h1-8H,9-10H2,(H,17,19)(H,18,20)	InChI=1S/C16H14N4S2/c1-3-7-13-11(5-1)19-15(21-13)17-9-10-18-16-20-12-6-2-4-8-14(12)22-16/h1-8H,9-10H2,(H,17,19)(H,18,20)	326.45	4.43	96.2194	6	2	49.84	4	5	4	0	0.125	22	0	0	2	2	6	0	0	0	0.359718329	0.183353512	0.183353512	-0.359718329	16	6	22	0.727272727	0.272727273	0
Byeon2007-3b	FC(C=C1)=CC2=C1N=C(S2)NCCNC3=NC(C=CC(F)=C4)=C4S3	10.1016/j.bmcl.2007.04.079			0.75	0.75			-9.124938737	[125I]TZDM	Ab42	f		Not specified		Radioligand Displacement	Not specified	InChI=1S/C16H12F2N4S2/c17-9-1-3-11-13(7-9)23-15(21-11)19-5-6-20-16-22-12-4-2-10(18)8-14(12)24-16/h1-4,7-8H,5-6H2,(H,19,21)(H,20,22)	InChI=1S/C16H12F2N4S2/c17-9-1-3-11-13(7-9)23-15(21-11)19-5-6-20-16-22-12-4-2-10(18)8-14(12)24-16/h1-4,7-8H,5-6H2,(H,19,21)(H,20,22)	362.43	4.7082	96.1354	6	2	49.84	4	5	4	0	0.125	24	0	0	2	2	8	0	0	0	0.359718318	0.183355152	0.183355152	-0.359718318	16	6	24	0.666666667	0.25	0
Byeon2007-3c	BrC(C=C1)=CC2=C1N=C(S2)NCCNC3=NC(C=CC(Br)=C4)=C4S3	10.1016/j.bmcl.2007.04.079			1.11	1.11			-8.954677021	[125I]TZDM	Ab42	f		Not specified		Radioligand Displacement	Not specified	InChI=1S/C16H12Br2N4S2/c17-9-1-3-11-13(7-9)23-15(21-11)19-5-6-20-16-22-12-4-2-10(18)8-14(12)24-16/h1-4,7-8H,5-6H2,(H,19,21)(H,20,22)	InChI=1S/C16H12Br2N4S2/c17-9-1-3-11-13(7-9)23-15(21-11)19-5-6-20-16-22-12-4-2-10(18)8-14(12)24-16/h1-4,7-8H,5-6H2,(H,19,21)(H,20,22)	484.242	5.955	111.6194	6	2	49.84	4	5	4	0	0.125	24	0	0	2	2	8	0	0	0	0.359718325	0.183354135	0.183354135	-0.359718325	16	6	24	0.666666667	0.25	0
Byeon2007-3d	ClC(C=C1)=CC2=C1N=C(S2)NCCNC3=NC(C=CC(Cl)=C4)=C4S3	10.1016/j.bmcl.2007.04.079			0.96	0.96			-9.017728767	[125I]TZDM	Ab42	f		Not specified		Radioligand Displacement	Not specified	InChI=1S/C16H12Cl2N4S2/c17-9-1-3-11-13(7-9)23-15(21-11)19-5-6-20-16-22-12-4-2-10(18)8-14(12)24-16/h1-4,7-8H,5-6H2,(H,19,21)(H,20,22)	InChI=1S/C16H12Cl2N4S2/c17-9-1-3-11-13(7-9)23-15(21-11)19-5-6-20-16-22-12-4-2-10(18)8-14(12)24-16/h1-4,7-8H,5-6H2,(H,19,21)(H,20,22)	395.34	5.7368	106.2394	6	2	49.84	4	5	4	0	0.125	24	0	0	2	2	8	0	0	0	0.359718324	0.183354336	0.183354336	-0.359718324	16	6	24	0.666666667	0.25	0
Byeon2007-3f	CC(C=C1)=CC2=C1N=C(S2)NCCNC3=NC(C=CC(C)=C4)=C4S3	10.1016/j.bmcl.2007.04.079			0.81	0.81			-9.091514981	[125I]TZDM	Ab42	f		Not specified		Radioligand Displacement	Not specified	InChI=1S/C18H18N4S2/c1-11-3-5-13-15(9-11)23-17(21-13)19-7-8-20-18-22-14-6-4-12(2)10-16(14)24-18/h3-6,9-10H,7-8H2,1-2H3,(H,19,21)(H,20,22)	InChI=1S/C18H18N4S2/c1-11-3-5-13-15(9-11)23-17(21-13)19-7-8-20-18-22-14-6-4-12(2)10-16(14)24-18/h3-6,9-10H,7-8H2,1-2H3,(H,19,21)(H,20,22)	354.504	5.04684	105.6934	6	2	49.84	4	5	4	0	0.222222222	24	0	0	2	2	6	0	0	0	0.359718328	0.18335367	0.18335367	-0.359718328	18	6	24	0.75	0.25	0
Byeon2007-3g	NC(C=C1)=CC2=C1N=C(S2)NCCNC3=NC(C=CC(N)=C4)=C4S3	10.1016/j.bmcl.2007.04.079			0.69	0.69			-9.161150909	[125I]TZDM	Ab42	f		Not specified		Radioligand Displacement	Not specified	InChI=1S/C16H16N6S2/c17-9-1-3-11-13(7-9)23-15(21-11)19-5-6-20-16-22-12-4-2-10(18)8-14(12)24-16/h1-4,7-8H,5-6,17-18H2,(H,19,21)(H,20,22)	InChI=1S/C16H16N6S2/c17-9-1-3-11-13(7-9)23-15(21-11)19-5-6-20-16-22-12-4-2-10(18)8-14(12)24-16/h1-4,7-8H,5-6,17-18H2,(H,19,21)(H,20,22)	356.48	3.5944	105.0442	8	4	101.88	4	5	4	0	0.125	24	0	0	2	2	8	0	0	0	0.398685934	0.183354731	0.183354731	-0.398685934	16	8	24	0.666666667	0.333333333	0
Byeon2007-4a	C1(N(C)CCN(C)C2=NC(C=CC=C3)=C3S2)=NC4=C(C=CC=C4)S1	10.1016/j.bmcl.2007.04.079			0.53	0.53			-9.27572413	[125I]TZDM	Ab42	f		Not specified		Radioligand Displacement	Not specified	InChI=1S/C18H18N4S2/c1-21(17-19-13-7-3-5-9-15(13)23-17)11-12-22(2)18-20-14-8-4-6-10-16(14)24-18/h3-10H,11-12H2,1-2H3	InChI=1S/C18H18N4S2/c1-21(17-19-13-7-3-5-9-15(13)23-17)11-12-22(2)18-20-14-8-4-6-10-16(14)24-18/h3-10H,11-12H2,1-2H3	354.504	4.4786	105.78	6	0	32.26	4	5	4	0	0.222222222	24	0	0	2	2	6	0	0	0	0.3493483	0.185733633	0.185733633	-0.3493483	18	6	24	0.75	0.25	0
Byeon2007-4b	FC(C=C1)=CC2=C1N=C(S2)N(C)CCN(C)C3=NC(C=CC(F)=C4)=C4S3	10.1016/j.bmcl.2007.04.079			1.37	1.37			-8.863279433	[125I]TZDM	Ab42	f		Not specified		Radioligand Displacement	Not specified	InChI=1S/C18H16F2N4S2/c1-23(17-21-13-5-3-11(19)9-15(13)25-17)7-8-24(2)18-22-14-6-4-12(20)10-16(14)26-18/h3-6,9-10H,7-8H2,1-2H3	InChI=1S/C18H16F2N4S2/c1-23(17-21-13-5-3-11(19)9-15(13)25-17)7-8-24(2)18-22-14-6-4-12(20)10-16(14)26-18/h3-6,9-10H,7-8H2,1-2H3	390.484	4.7568	105.696	6	0	32.26	4	5	4	0	0.222222222	26	0	0	2	2	8	0	0	0	0.349348289	0.185735273	0.185735273	-0.349348289	18	6	26	0.692307692	0.230769231	0
Byeon2007-4c	BrC(C=C1)=CC2=C1N=C(S2)N(C)CCN(C)C3=NC(C=CC(Br)=C4)=C4S3	10.1016/j.bmcl.2007.04.079			0.55	0.55			-9.259637311	[125I]TZDM	Ab42	f		Not specified		Radioligand Displacement	Not specified	InChI=1S/C18H16Br2N4S2/c1-23(17-21-13-5-3-11(19)9-15(13)25-17)7-8-24(2)18-22-14-6-4-12(20)10-16(14)26-18/h3-6,9-10H,7-8H2,1-2H3	InChI=1S/C18H16Br2N4S2/c1-23(17-21-13-5-3-11(19)9-15(13)25-17)7-8-24(2)18-22-14-6-4-12(20)10-16(14)26-18/h3-6,9-10H,7-8H2,1-2H3	512.296	6.0036	121.18	6	0	32.26	4	5	4	0	0.222222222	26	0	0	2	2	8	0	0	0	0.349348296	0.185734255	0.185734255	-0.349348296	18	6	26	0.692307692	0.230769231	0
Byeon2007-4d	ClC(C=C1)=CC2=C1N=C(S2)N(C)CCN(C)C3=NC(C=CC(Cl)=C4)=C4S3	10.1016/j.bmcl.2007.04.079			0.64	0.64			-9.193820026	[125I]TZDM	Ab42	f		Not specified		Radioligand Displacement	Not specified	InChI=1S/C18H16Cl2N4S2/c1-23(17-21-13-5-3-11(19)9-15(13)25-17)7-8-24(2)18-22-14-6-4-12(20)10-16(14)26-18/h3-6,9-10H,7-8H2,1-2H3	InChI=1S/C18H16Cl2N4S2/c1-23(17-21-13-5-3-11(19)9-15(13)25-17)7-8-24(2)18-22-14-6-4-12(20)10-16(14)26-18/h3-6,9-10H,7-8H2,1-2H3	423.394	5.7854	115.8	6	0	32.26	4	5	4	0	0.222222222	26	0	0	2	2	8	0	0	0	0.349348295	0.185734457	0.185734457	-0.349348295	18	6	26	0.692307692	0.230769231	0
Byeon2007-4e	CS(C1=CC(S2)=C(C=C1)N=C2N(C)CCN(C)C3=NC4=C(C=C(S(C)(=O)=O)C=C4)S3)(=O)=O	10.1016/j.bmcl.2007.04.079			0.55	0.55			-9.259637311	[125I]TZDM	Ab42	f		Not specified		Radioligand Displacement	Not specified	InChI=1S/C20H22N4O4S4/c1-23(19-21-15-7-5-13(31(3,25)26)11-17(15)29-19)9-10-24(2)20-22-16-8-6-14(32(4,27)28)12-18(16)30-20/h5-8,11-12H,9-10H2,1-4H3	InChI=1S/C20H22N4O4S4/c1-23(19-21-15-7-5-13(31(3,25)26)11-17(15)29-19)9-10-24(2)20-22-16-8-6-14(32(4,27)28)12-18(16)30-20/h5-8,11-12H,9-10H2,1-4H3	510.688	3.2856	131.9996	10	0	100.54	4	7	4	0	0.3	32	0	0	2	2	12	0	0	0	0.349348296	0.185734287	0.185734287	-0.349348296	20	12	32	0.625	0.375	0
Byeon2007-4f	CC(C=C1)=CC2=C1N=C(S2)N(C)CCN(C)C3=NC(C=CC(C)=C4)=C4S3	10.1016/j.bmcl.2007.04.079			0.61	0.61			-9.214670165	[125I]TZDM	Ab42	f		Not specified		Radioligand Displacement	Not specified	InChI=1S/C20H22N4S2/c1-13-5-7-15-17(11-13)25-19(21-15)23(3)9-10-24(4)20-22-16-8-6-14(2)12-18(16)26-20/h5-8,11-12H,9-10H2,1-4H3	InChI=1S/C20H22N4S2/c1-13-5-7-15-17(11-13)25-19(21-15)23(3)9-10-24(4)20-22-16-8-6-14(2)12-18(16)26-20/h5-8,11-12H,9-10H2,1-4H3	382.558	5.09544	115.254	6	0	32.26	4	5	4	0	0.3	26	0	0	2	2	6	0	0	0	0.349348299	0.185733791	0.185733791	-0.349348299	20	6	26	0.769230769	0.230769231	0
Byeon2007-4g	NC(C=C1)=CC2=C1N=C(S2)N(C)CCN(C)C3=NC(C=CC(N)=C4)=C4S3	10.1016/j.bmcl.2007.04.079			0.69	0.69			-9.161150909	[125I]TZDM	Ab42	f		Not specified		Radioligand Displacement	Not specified	InChI=1S/C18H20N6S2/c1-23(17-21-13-5-3-11(19)9-15(13)25-17)7-8-24(2)18-22-14-6-4-12(20)10-16(14)26-18/h3-6,9-10H,7-8,19-20H2,1-2H3	InChI=1S/C18H20N6S2/c1-23(17-21-13-5-3-11(19)9-15(13)25-17)7-8-24(2)18-22-14-6-4-12(20)10-16(14)26-18/h3-6,9-10H,7-8,19-20H2,1-2H3	384.534	3.643	114.6048	8	2	84.3	4	5	4	0	0.222222222	26	0	0	2	2	8	0	0	0	0.398685934	0.185734851	0.185734851	-0.398685934	18	8	26	0.692307692	0.307692308	0
PiB	OC1=CC=C(N=C(C2=CC=C(NC)C=C2)S3)C3=C1	10.1016/j.bmcl.2007.04.079			0.77	0.77			-9.113509275	[125I]TZDM	Ab42	f		Not specified		Radioligand Displacement	Not specified	InChI=1S/C14H12N2OS/c1-15-10-4-2-9(3-5-10)14-16-12-7-6-11(17)8-13(12)18-14/h2-8,15,17H,1H3	InChI=1S/C14H12N2OS/c1-15-10-4-2-9(3-5-10)14-16-12-7-6-11(17)8-13(12)18-14/h2-8,15,17H,1H3	256.33	3.7106	76.2675	4	2	45.15	3	2	3	0	0.071428571	18	0	0	2	1	4	0	0	0	0.507910913	0.124107303	0.124107303	-0.507910913	14	4	18	0.777777778	0.222222222	0
IMPY	IC1=CN2C(C=C1)=NC(C3=CC=C(N(C)C)C=C3)=C2	10.1021/jm030477w			15	15		5	-7.823908741	[125I]TZDM	Ab40	f	Not specified	The Aβ40 monomer was aggregated by dissolving this peptide (0.5 mg/mL) in a buffer [sodium phosphate (pH 7.4, 10 mM) containing EDTA (1 mM)]. The solution was incubated at 37 °C for 46 h with gentle and constant shaking at 30 strokes per minute. After formation of the Aβ40 aggregates, the solution was dispensed into separate vials and stored at −80 °C for future use.		Radioligand Displacement	Binding was assayed in 12 mm × 75 mm borosilicate glass tubes. For inhibition studies, the reaction mixture contained Aβ40 aggregates (10–20 nM in the final mixture, 50 μL) or human AD brain homogenate (100 μg in the final mixture, 100 μL), inhibitors (10^-5–10^-10 M in 10% ethanol, 50 μL), [125I]TZDM (in 40% EtOH, 0.05 nM in the final mixture, 50 μL, 100 000 dpm/tube), and aqueous EtOH (10% v/v)…	InChI=1S/C15H14IN3/c1-18(2)13-6-3-11(4-7-13)14-10-19-9-12(16)5-8-15(19)17-14/h3-10H,1-2H3	InChI=1S/C15H14IN3/c1-18(2)13-6-3-11(4-7-13)14-10-19-9-12(16)5-8-15(19)17-14/h3-10H,1-2H3	363.202	3.6719	87.672	3	0	20.54	3	2	3	0	0.133333333	19	0	0	1	2	4	0	0	0	0.377660894	0.136976662	0.136976662	-0.377660894	15	3	19	0.789473684	0.157894737	0
FEM-IMPY	CN(CCF)C(C=C1)=CC=C1C2=CN3C(C=CC(I)=C3)=N2	10.1021/jm030477w			27	27		8	-7.568636236	[125I]TZDM	Ab40	f	Not specified	The Aβ40 monomer was aggregated by dissolving this peptide (0.5 mg/mL) in a buffer [sodium phosphate (pH 7.4, 10 mM) containing EDTA (1 mM)]. The solution was incubated at 37 °C for 46 h with gentle and constant shaking at 30 strokes per minute. After formation of the Aβ40 aggregates, the solution was dispensed into separate vials and stored at −80 °C for future use.		Radioligand Displacement	Binding was assayed in 12 mm × 75 mm borosilicate glass tubes as described in ref 4. For inhibition studies, the reaction mixture contained Aβ40 aggregates (10–20 nM in the final mixture, 50 μL) or human AD brain homogenate (100 μg in the final mixture, 100 μL), inhibitors (10^-5–10^-10 M in 10% ethanol, 50 μL), [125I]TZDM (in 40% EtOH, 0.05 nM in the final mixture, 50 μL, 100 000 dpm/tube), and …	InChI=1S/C16H15FIN3/c1-20(9-8-17)14-5-2-12(3-6-14)15-11-21-10-13(18)4-7-16(21)19-15/h2-7,10-11H,8-9H2,1H3	InChI=1S/C16H15FIN3/c1-20(9-8-17)14-5-2-12(3-6-14)15-11-21-10-13(18)4-7-16(21)19-15/h2-7,10-11H,8-9H2,1H3	395.219	4.0116	92.59	3	0	20.54	3	4	3	0	0.1875	21	0	0	1	2	5	0	0	0	0.371975104	0.136976662	0.136976662	-0.371975104	16	3	21	0.761904762	0.142857143	0
FEM-IMPY	CN(CCF)C(C=C1)=CC=C1C2=CN3C(C=CC(I)=C3)=N2	10.1021/jm030477w			83	83		69	-7.080921908	[125I]TZDM	AD	b	Not specified	Not specified		Radioligand Displacement	Binding was assayed in 12 mm × 75 mm borosilicate glass tubes as described in ref 4. For inhibition studies, the reaction mixture contained Aβ40 aggregates (10–20 nM in the final mixture, 50 μL) or human AD brain homogenate (100 μg in the final mixture, 100 μL), inhibitors (10^-5–10^-10 M in 10% ethanol, 50 μL), [125I]TZDM (in 40% EtOH, 0.05 nM in the final mixture, 50 μL, 100 000 dpm/tube), and …	InChI=1S/C16H15FIN3/c1-20(9-8-17)14-5-2-12(3-6-14)15-11-21-10-13(18)4-7-16(21)19-15/h2-7,10-11H,8-9H2,1H3	InChI=1S/C16H15FIN3/c1-20(9-8-17)14-5-2-12(3-6-14)15-11-21-10-13(18)4-7-16(21)19-15/h2-7,10-11H,8-9H2,1H3	395.219	4.0116	92.59	3	0	20.54	3	4	3	0	0.1875	21	0	0	1	2	5	0	0	0	0.371975104	0.136976662	0.136976662	-0.371975104	16	3	21	0.761904762	0.142857143	0
FPM-IMPY	CN(CCCF)C(C=C1)=CC=C1C2=CN3C(C=CC(I)=C3)=N2	10.1021/jm030477w			40	40		5	-7.397940009	[125I]TZDM	Ab40	f	Not specified	The Aβ40 monomer was aggregated by dissolving this peptide (0.5 mg/mL) in a buffer [sodium phosphate (pH 7.4, 10 mM) containing EDTA (1 mM)]. The solution was incubated at 37 °C for 46 h with gentle and constant shaking at 30 strokes per minute. After formation of the Aβ40 aggregates, the solution was dispensed into separate vials and stored at −80 °C for future use.		Radioligand Displacement	Binding was assayed in 12 mm × 75 mm borosilicate glass tubes as described in ref 4. For inhibition studies, the reaction mixture contained Aβ40 aggregates (10–20 nM in the final mixture, 50 μL) or human AD brain homogenate (100 μg in the final mixture, 100 μL), inhibitors (10^-5–10^-10 M in 10% ethanol, 50 μL), [125I]TZDM (in 40% EtOH, 0.05 nM in the final mixture, 50 μL, 100 000 dpm/tube), and …	InChI=1S/C17H17FIN3/c1-21(10-2-9-18)15-6-3-13(4-7-15)16-12-22-11-14(19)5-8-17(22)20-16/h3-8,11-12H,2,9-10H2,1H3	InChI=1S/C17H17FIN3/c1-21(10-2-9-18)15-6-3-13(4-7-15)16-12-22-11-14(19)5-8-17(22)20-16/h3-8,11-12H,2,9-10H2,1H3	409.246	4.4017	97.207	3	0	20.54	3	5	3	0	0.235294118	22	0	0	1	2	5	0	0	0	0.374501494	0.136976662	0.136976662	-0.374501494	17	3	22	0.772727273	0.136363636	0
Cai2007-13a	CN(C(C(F)(F)F)=O)C(C(Br)=C1)=CC=C1C2=CN3C(C=CC(Br)=C3)=N2	10.1021/jm0702231			>1000	>1000				[3H]PiB	AD	b	AD brain cerebral gray matter homogenates	The AD brain tissue was homogenized in PBS (1:50 in vol) to generate a suspension, which was dispensed into 1.0 mL and stored in a −70 °C freezer for further use.		Radioligand Displacement	For each assay, a new vial with 1.0 mL of AD brain homogenate suspension was thawed, vortexed, and diluted with PBS until 10.0 mL. An amount of 100 μL of suspension was used in each tube. [3H]PIB solution (1 mCi/mL) was diluted with PBS to give an intermediate stock solution (10 nCi/μL), which was further diluted with PBS to yield a dilute stock solution (1 nCi/μL). An amount of 100 μL was used i…	InChI=1S/C16H10Br2F3N3O/c1-23(15(25)16(19,20)21)13-4-2-9(6-11(13)18)12-8-24-7-10(17)3-5-14(24)22-12/h2-8H,1H3	InChI=1S/C16H10Br2F3N3O/c1-23(15(25)16(19,20)21)13-4-2-9(6-11(13)18)12-8-24-7-10(17)3-5-14(24)22-12/h2-8H,1H3	477.078	5.0514	95.493	3	0	37.61	3	2	3	0	0.125	25	0	0	1	2	9	0	0	0	0.47124469	0.47124469	0.306550262	-0.306550262	16	4	25	0.64	0.16	0
Cai2007-13b	BrC(C=C1)=CN2C1=NC(C3=CC=C(NC(C(F)(F)F)=O)C(C)=C3)=C2	10.1021/jm0702231			>1000	>1000				[3H]PiB	AD	b	AD brain cerebral gray matter homogenates	The AD brain tissue was homogenized in PBS (1:50 in vol) to generate a suspension, which was dispensed into 1.0 mL and stored in a −70 °C freezer for further use.		Radioligand Displacement	For each assay, a new vial with 1.0 mL of AD brain homogenate suspension was thawed, vortexed, and diluted with PBS until 10.0 mL. An amount of 100 μL of suspension was used in each tube. [3H]PIB solution (1 mCi/mL) was diluted with PBS to give an intermediate stock solution (10 nCi/μL), which was further diluted with PBS to yield a dilute stock solution (1 nCi/μL). An amount of 100 μL was used i…	InChI=1S/C16H11BrF3N3O/c1-9-6-10(2-4-12(9)22-15(24)16(18,19)20)13-8-23-7-11(17)3-5-14(23)21-13/h2-8H,1H3,(H,22,24)	InChI=1S/C16H11BrF3N3O/c1-9-6-10(2-4-12(9)22-15(24)16(18,19)20)13-8-23-7-11(17)3-5-14(23)21-13/h2-8H,1H3,(H,22,24)	398.182	4.57302	87.7497	3	1	46.4	3	2	3	0	0.125	24	0	0	1	2	8	0	0	0	0.471032566	0.471032566	0.318010307	-0.318010307	16	4	24	0.666666667	0.166666667	0
Cai2007-13c	CN(C(C)=O)C(C(C)=C1)=CC=C1C2=CN3C(C=CC(Br)=C3)=N2	10.1021/jm0702231			>1000	>1000				[3H]PiB	AD	b	AD brain cerebral gray matter homogenates	The AD brain tissue was homogenized in PBS (1:50 in vol) to generate a suspension, which was dispensed into 1.0 mL and stored in a −70 °C freezer for further use.		Radioligand Displacement	For each assay, a new vial with 1.0 mL of AD brain homogenate suspension was thawed, vortexed, and diluted with PBS until 10.0 mL. An amount of 100 μL of suspension was used in each tube. [3H]PIB solution (1 mCi/mL) was diluted with PBS to give an intermediate stock solution (10 nCi/μL), which was further diluted with PBS to yield a dilute stock solution (1 nCi/μL). An amount of 100 μL was used i…	InChI=1S/C17H16BrN3O/c1-11-8-13(4-6-16(11)20(3)12(2)22)15-10-21-9-14(18)5-7-17(21)19-15/h4-10H,1-3H3	InChI=1S/C17H16BrN3O/c1-11-8-13(4-6-16(11)20(3)12(2)22)15-10-21-9-14(18)5-7-17(21)19-15/h4-10H,1-3H3	358.239	4.05492	92.149	3	0	37.61	3	2	3	0	0.176470588	22	0	0	1	2	5	0	0	0	0.315474429	0.22310405	0.22310405	-0.315474429	17	4	22	0.772727273	0.181818182	0
Cai2007-14c	CNC(C(C)=C1)=CC=C1C2=CN3C(C=CC(Br)=C3)=N2	10.1021/jm0702231			>1000	>1000				[3H]PiB	AD	b	AD brain cerebral gray matter homogenates	The AD brain tissue was homogenized in PBS (1:50 in vol) to generate a suspension, which was dispensed into 1.0 mL and stored in a −70 °C freezer for further use.		Radioligand Displacement	For each assay, a new vial with 1.0 mL of AD brain homogenate suspension was thawed, vortexed, and diluted with PBS until 10.0 mL. An amount of 100 μL of suspension was used in each tube. [3H]PIB solution (1 mCi/mL) was diluted with PBS to give an intermediate stock solution (10 nCi/μL), which was further diluted with PBS to yield a dilute stock solution (1 nCi/μL). An amount of 100 μL was used i…	InChI=1S/C15H14BrN3/c1-10-7-11(3-5-13(10)17-2)14-9-19-8-12(16)4-6-15(19)18-14/h3-9,17H,1-2H3	InChI=1S/C15H14BrN3/c1-10-7-11(3-5-13(10)17-2)14-9-19-8-12(16)4-6-15(19)18-14/h3-9,17H,1-2H3	316.202	4.11392	82.6117	3	1	29.33	3	2	3	0	0.133333333	19	0	0	1	2	4	0	0	0	0.387907079	0.136981478	0.136981478	-0.387907079	15	3	19	0.789473684	0.157894737	0
Cai2007-15f	CNC(C(C)=C1)=CC=C1C2=CN3C(C=CC(SCC(N)=O)=C3)=N2	10.1021/jm0702231			>1000	>1000				[3H]PiB	AD	b	AD brain cerebral gray matter homogenates	The AD brain tissue was homogenized in PBS (1:50 in vol) to generate a suspension, which was dispensed into 1.0 mL and stored in a −70 °C freezer for further use.		Radioligand Displacement	For each assay, a new vial with 1.0 mL of AD brain homogenate suspension was thawed, vortexed, and diluted with PBS until 10.0 mL. An amount of 100 μL of suspension was used in each tube. [3H]PIB solution (1 mCi/mL) was diluted with PBS to give an intermediate stock solution (10 nCi/μL), which was further diluted with PBS to yield a dilute stock solution (1 nCi/μL). An amount of 100 μL was used i…	InChI=1S/C17H18N4OS/c1-11-7-12(3-5-14(11)19-2)15-9-21-8-13(23-10-16(18)22)4-6-17(21)20-15/h3-9,19H,10H2,1-2H3,(H2,18,22)	InChI=1S/C17H18N4OS/c1-11-7-12(3-5-14(11)19-2)15-9-21-8-13(23-10-16(18)22)4-6-17(21)20-15/h3-9,19H,10H2,1-2H3,(H2,18,22)	326.425	2.92882	94.8301	5	2	72.42	3	5	3	0	0.176470588	23	0	0	1	2	6	0	0	0	0.387907079	0.227284369	0.227284369	-0.387907079	17	6	23	0.739130435	0.260869565	0
Cai2007-15g	CNC(C(C)=C1)=CC=C1C2=CN3C(C=CC(SCCO)=C3)=N2	10.1021/jm0702231			>1000	>1000				[3H]PiB	AD	b	AD brain cerebral gray matter homogenates	The AD brain tissue was homogenized in PBS (1:50 in vol) to generate a suspension, which was dispensed into 1.0 mL and stored in a −70 °C freezer for further use.		Radioligand Displacement	For each assay, a new vial with 1.0 mL of AD brain homogenate suspension was thawed, vortexed, and diluted with PBS until 10.0 mL. An amount of 100 μL of suspension was used in each tube. [3H]PIB solution (1 mCi/mL) was diluted with PBS to give an intermediate stock solution (10 nCi/μL), which was further diluted with PBS to yield a dilute stock solution (1 nCi/μL). An amount of 100 μL was used i…	InChI=1S/C17H19N3OS/c1-12-9-13(3-5-15(12)18-2)16-11-20-10-14(22-8-7-21)4-6-17(20)19-16/h3-6,9-11,18,21H,7-8H2,1-2H3	InChI=1S/C17H19N3OS/c1-12-9-13(3-5-15(12)18-2)16-11-20-10-14(22-8-7-21)4-6-17(20)19-16/h3-6,9-11,18,21H,7-8H2,1-2H3	313.426	3.43582	92.7215	5	2	49.56	3	5	3	0	0.235294118	22	0	0	1	2	5	0	0	0	0.395505498	0.13698209	0.13698209	-0.395505498	17	5	22	0.772727273	0.227272727	0
IMPY	IC1=CN2C(C=C1)=NC(C3=CC=C(N(C)C)C=C3)=C2	10.1021/jm0702231			8.9	8.9		0.7	-8.050609993	[3H]PiB	AD	b	AD brain cerebral gray matter homogenates	The AD brain tissue was homogenized in PBS (1:50 in vol) to generate a suspension, which was dispensed into 1.0 mL and stored in a −70 °C freezer for further use.		Radioligand Displacement	For each assay, a new vial with 1.0 mL of AD brain homogenate suspension was thawed, vortexed, and diluted with PBS until 10.0 mL. An amount of 100 μL of suspension was used in each tube. [3H]PIB solution (1 mCi/mL) was diluted with PBS to give an intermediate stock solution (10 nCi/μL), which was further diluted with PBS to yield a dilute stock solution (1 nCi/μL). An amount of 100 μL was used i…	InChI=1S/C15H14IN3/c1-18(2)13-6-3-11(4-7-13)14-10-19-9-12(16)5-8-15(19)17-14/h3-10H,1-2H3	InChI=1S/C15H14IN3/c1-18(2)13-6-3-11(4-7-13)14-10-19-9-12(16)5-8-15(19)17-14/h3-10H,1-2H3	363.202	3.6719	87.672	3	0	20.54	3	2	3	0	0.133333333	19	0	0	1	2	4	0	0	0	0.377660894	0.136976662	0.136976662	-0.377660894	15	3	19	0.789473684	0.157894737	0
Cai2007-12b	CN(C)C(C=C1)=CC=C1C2=CN3C(C=CC(Br)=C3)=N2	10.1021/jm0702231			5.9	5.9		0.4	-8.229147988	[3H]PiB	AD	b	AD brain cerebral gray matter homogenates	The AD brain tissue was homogenized in PBS (1:50 in vol) to generate a suspension, which was dispensed into 1.0 mL and stored in a −70 °C freezer for further use.		Radioligand Displacement	For each assay, a new vial with 1.0 mL of AD brain homogenate suspension was thawed, vortexed, and diluted with PBS until 10.0 mL. An amount of 100 μL of suspension was used in each tube. [3H]PIB solution (1 mCi/mL) was diluted with PBS to give an intermediate stock solution (10 nCi/μL), which was further diluted with PBS to yield a dilute stock solution (1 nCi/μL). An amount of 100 μL was used i…	InChI=1S/C15H14BrN3/c1-18(2)13-6-3-11(4-7-13)14-10-19-9-12(16)5-8-15(19)17-14/h3-10H,1-2H3	InChI=1S/C15H14BrN3/c1-18(2)13-6-3-11(4-7-13)14-10-19-9-12(16)5-8-15(19)17-14/h3-10H,1-2H3	316.202	3.8298	82.655	3	0	20.54	3	2	3	0	0.133333333	19	0	0	1	2	4	0	0	0	0.377660894	0.136981477	0.136981477	-0.377660894	15	3	19	0.789473684	0.157894737	0
Cai2007-12c	CN(C)C(C=C1)=CC=C1C2=CN3C(C=CC(Cl)=C3)=N2	10.1021/jm0702231			24.2	24.2		5.6	-7.616184634	[3H]PiB	AD	b	AD brain cerebral gray matter homogenates	The AD brain tissue was homogenized in PBS (1:50 in vol) to generate a suspension, which was dispensed into 1.0 mL and stored in a −70 °C freezer for further use.		Radioligand Displacement	For each assay, a new vial with 1.0 mL of AD brain homogenate suspension was thawed, vortexed, and diluted with PBS until 10.0 mL. An amount of 100 μL of suspension was used in each tube. [3H]PIB solution (1 mCi/mL) was diluted with PBS to give an intermediate stock solution (10 nCi/μL), which was further diluted with PBS to yield a dilute stock solution (1 nCi/μL). An amount of 100 μL was used i…	InChI=1S/C15H14ClN3/c1-18(2)13-6-3-11(4-7-13)14-10-19-9-12(16)5-8-15(19)17-14/h3-10H,1-2H3	InChI=1S/C15H14ClN3/c1-18(2)13-6-3-11(4-7-13)14-10-19-9-12(16)5-8-15(19)17-14/h3-10H,1-2H3	271.751	3.7207	79.965	3	0	20.54	3	2	3	0	0.133333333	19	0	0	1	2	4	0	0	0	0.377660894	0.137006215	0.137006215	-0.377660894	15	3	19	0.789473684	0.157894737	0
Cai2007-12d	CN(C)C(C=C1)=CC=C1C2=CN3C(C=CC(F)=C3)=N2	10.1021/jm0702231			13	13		1.6	-7.886056648	[3H]PiB	AD	b	AD brain cerebral gray matter homogenates	The AD brain tissue was homogenized in PBS (1:50 in vol) to generate a suspension, which was dispensed into 1.0 mL and stored in a −70 °C freezer for further use.		Radioligand Displacement	For each assay, a new vial with 1.0 mL of AD brain homogenate suspension was thawed, vortexed, and diluted with PBS until 10.0 mL. An amount of 100 μL of suspension was used in each tube. [3H]PIB solution (1 mCi/mL) was diluted with PBS to give an intermediate stock solution (10 nCi/μL), which was further diluted with PBS to yield a dilute stock solution (1 nCi/μL). An amount of 100 μL was used i…	InChI=1S/C15H14FN3/c1-18(2)13-6-3-11(4-7-13)14-10-19-9-12(16)5-8-15(19)17-14/h3-10H,1-2H3	InChI=1S/C15H14FN3/c1-18(2)13-6-3-11(4-7-13)14-10-19-9-12(16)5-8-15(19)17-14/h3-10H,1-2H3	255.296	3.2064	74.913	3	0	20.54	3	2	3	0	0.133333333	19	0	0	1	2	4	0	0	0	0.377660894	0.139436094	0.139436094	-0.377660894	15	3	19	0.789473684	0.157894737	0
Cai2007-12e	CN(C)C(C=C1)=CC=C1C2=CN3C(C=CC(C#N)=C3)=N2	10.1021/jm0702231			8.2	8.2		1	-8.086186148	[3H]PiB	AD	b	AD brain cerebral gray matter homogenates	The AD brain tissue was homogenized in PBS (1:50 in vol) to generate a suspension, which was dispensed into 1.0 mL and stored in a −70 °C freezer for further use.		Radioligand Displacement	For each assay, a new vial with 1.0 mL of AD brain homogenate suspension was thawed, vortexed, and diluted with PBS until 10.0 mL. An amount of 100 μL of suspension was used in each tube. [3H]PIB solution (1 mCi/mL) was diluted with PBS to give an intermediate stock solution (10 nCi/μL), which was further diluted with PBS to yield a dilute stock solution (1 nCi/μL). An amount of 100 μL was used i…	InChI=1S/C16H14N4/c1-19(2)14-6-4-13(5-7-14)15-11-20-10-12(9-17)3-8-16(20)18-15/h3-8,10-11H,1-2H3	InChI=1S/C16H14N4/c1-19(2)14-6-4-13(5-7-14)15-11-20-10-12(9-17)3-8-16(20)18-15/h3-8,10-11H,1-2H3	262.316	2.93898	79.67	4	0	44.33	3	2	3	0	0.125	20	0	0	1	2	4	0	0	0	0.377660894	0.136992079	0.136992079	-0.377660894	16	4	20	0.8	0.2	1
Cai2007-12f	CN(C)C(C=C1)=CC=C1C2=CN3C(C=CC([N+]([O-])=O)=C3)=N2	10.1021/jm0702231			7.6	7.6		0.7	-8.119186408	[3H]PiB	AD	b	AD brain cerebral gray matter homogenates	The AD brain tissue was homogenized in PBS (1:50 in vol) to generate a suspension, which was dispensed into 1.0 mL and stored in a −70 °C freezer for further use.		Radioligand Displacement	For each assay, a new vial with 1.0 mL of AD brain homogenate suspension was thawed, vortexed, and diluted with PBS until 10.0 mL. An amount of 100 μL of suspension was used in each tube. [3H]PIB solution (1 mCi/mL) was diluted with PBS to give an intermediate stock solution (10 nCi/μL), which was further diluted with PBS to yield a dilute stock solution (1 nCi/μL). An amount of 100 μL was used i…	InChI=1S/C15H14N4O2/c1-17(2)12-5-3-11(4-6-12)14-10-18-9-13(19(20)21)7-8-15(18)16-14/h3-10H,1-2H3	InChI=1S/C15H14N4O2/c1-17(2)12-5-3-11(4-6-12)14-10-18-9-13(19(20)21)7-8-15(18)16-14/h3-10H,1-2H3	282.303	2.9755	81.6094	5	0	63.68	3	3	3	0	0.133333333	21	0	0	1	2	6	0	0	0	0.377660894	0.285501174	0.285501174	-0.377660894	15	6	21	0.714285714	0.285714286	0
Cai2007-12g	CN(C)C(C=C1)=CC=C1C2=CN3C(C=CC(OC)=C3)=N2	10.1021/jm0702231			38.5	38.5		5	-7.41453927	[3H]PiB	AD	b	AD brain cerebral gray matter homogenates	The AD brain tissue was homogenized in PBS (1:50 in vol) to generate a suspension, which was dispensed into 1.0 mL and stored in a −70 °C freezer for further use.		Radioligand Displacement	For each assay, a new vial with 1.0 mL of AD brain homogenate suspension was thawed, vortexed, and diluted with PBS until 10.0 mL. An amount of 100 μL of suspension was used in each tube. [3H]PIB solution (1 mCi/mL) was diluted with PBS to give an intermediate stock solution (10 nCi/μL), which was further diluted with PBS to yield a dilute stock solution (1 nCi/μL). An amount of 100 μL was used i…	InChI=1S/C16H17N3O/c1-18(2)13-6-4-12(5-7-13)15-11-19-10-14(20-3)8-9-16(19)17-15/h4-11H,1-3H3	InChI=1S/C16H17N3O/c1-18(2)13-6-4-12(5-7-13)15-11-19-10-14(20-3)8-9-16(19)17-15/h4-11H,1-3H3	267.332	3.0759	81.507	4	0	29.77	3	3	3	0	0.1875	20	0	0	1	2	4	0	0	0	0.495211477	0.137166976	0.137166976	-0.495211477	16	4	20	0.8	0.2	0
Cai2007-12h	CN(C)C(C=C1)=CC=C1C2=CN3C(C=CC(SCC)=C3)=N2	10.1021/jm0702231			8.3	8.3		0.5	-8.080921908	[3H]PiB	AD	b	AD brain cerebral gray matter homogenates	The AD brain tissue was homogenized in PBS (1:50 in vol) to generate a suspension, which was dispensed into 1.0 mL and stored in a −70 °C freezer for further use.		Radioligand Displacement	For each assay, a new vial with 1.0 mL of AD brain homogenate suspension was thawed, vortexed, and diluted with PBS until 10.0 mL. An amount of 100 μL of suspension was used in each tube. [3H]PIB solution (1 mCi/mL) was diluted with PBS to give an intermediate stock solution (10 nCi/μL), which was further diluted with PBS to yield a dilute stock solution (1 nCi/μL). An amount of 100 μL was used i…	InChI=1S/C17H19N3S/c1-4-21-15-9-10-17-18-16(12-20(17)11-15)13-5-7-14(8-6-13)19(2)3/h5-12H,4H2,1-3H3	InChI=1S/C17H19N3S/c1-4-21-15-9-10-17-18-16(12-20(17)11-15)13-5-7-14(8-6-13)19(2)3/h5-12H,4H2,1-3H3	297.427	4.1793	91.353	4	0	20.54	3	4	3	0	0.235294118	21	0	0	1	2	4	0	0	0	0.377660894	0.136982088	0.136982088	-0.377660894	17	4	21	0.80952381	0.19047619	0
Cai2007-12i	CN(C)C(C=C1)=CC=C1C2=CN3C(C(I)=CC(Br)=C3)=N2	10.1021/jm0702231			183	183		61	-6.73754891	[3H]PiB	AD	b	AD brain cerebral gray matter homogenates	The AD brain tissue was homogenized in PBS (1:50 in vol) to generate a suspension, which was dispensed into 1.0 mL and stored in a −70 °C freezer for further use.		Radioligand Displacement	For each assay, a new vial with 1.0 mL of AD brain homogenate suspension was thawed, vortexed, and diluted with PBS until 10.0 mL. An amount of 100 μL of suspension was used in each tube. [3H]PIB solution (1 mCi/mL) was diluted with PBS to give an intermediate stock solution (10 nCi/μL), which was further diluted with PBS to yield a dilute stock solution (1 nCi/μL). An amount of 100 μL was used i…	InChI=1S/C15H13BrIN3/c1-19(2)12-5-3-10(4-6-12)14-9-20-8-11(16)7-13(17)15(20)18-14/h3-9H,1-2H3	InChI=1S/C15H13BrIN3/c1-19(2)12-5-3-10(4-6-12)14-9-20-8-11(16)7-13(17)15(20)18-14/h3-9H,1-2H3	442.098	4.4344	95.372	3	0	20.54	3	2	3	0	0.133333333	20	0	0	1	2	5	0	0	0	0.377660894	0.150499979	0.150499979	-0.377660894	15	3	20	0.75	0.15	0
Cai2007-12k	CN(C)C(C=C1)=CC=C1C2=CN3C(C=CC(O)=C3)=N2	10.1021/jm0702231			177	177		31	-6.752026734	[3H]PiB	AD	b	AD brain cerebral gray matter homogenates	The AD brain tissue was homogenized in PBS (1:50 in vol) to generate a suspension, which was dispensed into 1.0 mL and stored in a −70 °C freezer for further use.		Radioligand Displacement	For each assay, a new vial with 1.0 mL of AD brain homogenate suspension was thawed, vortexed, and diluted with PBS until 10.0 mL. An amount of 100 μL of suspension was used in each tube. [3H]PIB solution (1 mCi/mL) was diluted with PBS to give an intermediate stock solution (10 nCi/μL), which was further diluted with PBS to yield a dilute stock solution (1 nCi/μL). An amount of 100 μL was used i…	InChI=1S/C15H15N3O/c1-17(2)12-5-3-11(4-6-12)14-10-18-9-13(19)7-8-15(18)16-14/h3-10,19H,1-2H3	InChI=1S/C15H15N3O/c1-17(2)12-5-3-11(4-6-12)14-10-18-9-13(19)7-8-15(18)16-14/h3-10,19H,1-2H3	253.305	2.7729	76.6198	4	1	40.77	3	2	3	0	0.133333333	19	0	0	1	2	4	0	0	0	0.506407179	0.137166737	0.137166737	-0.506407179	15	4	19	0.789473684	0.210526316	0
Cai2007-14a	CNC(C(Br)=C1)=CC=C1C2=CN3C(C=CC(Br)=C3)=N2	10.1021/jm0702231			7.4	7.4		0.6	-8.13076828	[3H]PiB	AD	b	AD brain cerebral gray matter homogenates	The AD brain tissue was homogenized in PBS (1:50 in vol) to generate a suspension, which was dispensed into 1.0 mL and stored in a −70 °C freezer for further use.		Radioligand Displacement	For each assay, a new vial with 1.0 mL of AD brain homogenate suspension was thawed, vortexed, and diluted with PBS until 10.0 mL. An amount of 100 μL of suspension was used in each tube. [3H]PIB solution (1 mCi/mL) was diluted with PBS to give an intermediate stock solution (10 nCi/μL), which was further diluted with PBS to yield a dilute stock solution (1 nCi/μL). An amount of 100 μL was used i…	InChI=1S/C14H11Br2N3/c1-17-12-4-2-9(6-11(12)16)13-8-19-7-10(15)3-5-14(19)18-13/h2-8,17H,1H3	InChI=1S/C14H11Br2N3/c1-17-12-4-2-9(6-11(12)16)13-8-19-7-10(15)3-5-14(19)18-13/h2-8,17H,1H3	381.071	4.568	85.5747	3	1	29.33	3	2	3	0	0.071428571	19	0	0	1	2	5	0	0	0	0.387208956	0.136981483	0.136981483	-0.387208956	14	3	19	0.736842105	0.157894737	0
Cai2007-14b	NC(C(C)=C1)=CC=C1C2=CN3C(C=CC(Br)=C3)=N2	10.1021/jm0702231			658	658		47	-6.181774106	[3H]PiB	AD	b	AD brain cerebral gray matter homogenates	The AD brain tissue was homogenized in PBS (1:50 in vol) to generate a suspension, which was dispensed into 1.0 mL and stored in a −70 °C freezer for further use.		Radioligand Displacement	For each assay, a new vial with 1.0 mL of AD brain homogenate suspension was thawed, vortexed, and diluted with PBS until 10.0 mL. An amount of 100 μL of suspension was used in each tube. [3H]PIB solution (1 mCi/mL) was diluted with PBS to give an intermediate stock solution (10 nCi/μL), which was further diluted with PBS to yield a dilute stock solution (1 nCi/μL). An amount of 100 μL was used i…	InChI=1S/C14H12BrN3/c1-9-6-10(2-4-12(9)16)13-8-18-7-11(15)3-5-14(18)17-13/h2-8H,16H2,1H3	InChI=1S/C14H12BrN3/c1-9-6-10(2-4-12(9)16)13-8-18-7-11(15)3-5-14(18)17-13/h2-8H,16H2,1H3	302.175	3.65442	77.4774	3	1	43.32	3	1	3	0	0.071428571	18	0	0	1	2	4	0	0	0	0.398513511	0.136981478	0.136981478	-0.398513511	14	3	18	0.777777778	0.166666667	0
Cai2007-15a	CNC(C=C1)=CC=C1C2=CN3C(C=CC(SCC(N)=O)=C3)=N2	10.1021/jm0702231			1840	1840		497	-5.735182177	[3H]PiB	AD	b	AD brain cerebral gray matter homogenates	The AD brain tissue was homogenized in PBS (1:50 in vol) to generate a suspension, which was dispensed into 1.0 mL and stored in a −70 °C freezer for further use.		Radioligand Displacement	For each assay, a new vial with 1.0 mL of AD brain homogenate suspension was thawed, vortexed, and diluted with PBS until 10.0 mL. An amount of 100 μL of suspension was used in each tube. [3H]PIB solution (1 mCi/mL) was diluted with PBS to give an intermediate stock solution (10 nCi/μL), which was further diluted with PBS to yield a dilute stock solution (1 nCi/μL). An amount of 100 μL was used i…	InChI=1S/C16H16N4OS/c1-18-12-4-2-11(3-5-12)14-9-20-8-13(22-10-15(17)21)6-7-16(20)19-14/h2-9,18H,10H2,1H3,(H2,17,21)	InChI=1S/C16H16N4OS/c1-18-12-4-2-11(3-5-12)14-9-20-8-13(22-10-15(17)21)6-7-16(20)19-14/h2-9,18H,10H2,1H3,(H2,17,21)	312.398	2.6204	90.0931	5	2	72.42	3	5	3	0	0.125	22	0	0	1	2	6	0	0	0	0.388121484	0.227284369	0.227284369	-0.388121484	16	6	22	0.727272727	0.272727273	0
Cai2007-15b	CNC(C=C1)=CC=C1C2=CN3C(C=CC(SCCO)=C3)=N2	10.1021/jm0702231			645	645		75	-6.190440285	[3H]PiB	AD	b	AD brain cerebral gray matter homogenates	The AD brain tissue was homogenized in PBS (1:50 in vol) to generate a suspension, which was dispensed into 1.0 mL and stored in a −70 °C freezer for further use.		Radioligand Displacement	For each assay, a new vial with 1.0 mL of AD brain homogenate suspension was thawed, vortexed, and diluted with PBS until 10.0 mL. An amount of 100 μL of suspension was used in each tube. [3H]PIB solution (1 mCi/mL) was diluted with PBS to give an intermediate stock solution (10 nCi/μL), which was further diluted with PBS to yield a dilute stock solution (1 nCi/μL). An amount of 100 μL was used i…	InChI=1S/C16H17N3OS/c1-17-13-4-2-12(3-5-13)15-11-19-10-14(21-9-8-20)6-7-16(19)18-15/h2-7,10-11,17,20H,8-9H2,1H3	InChI=1S/C16H17N3OS/c1-17-13-4-2-12(3-5-13)15-11-19-10-14(21-9-8-20)6-7-16(19)18-15/h2-7,10-11,17,20H,8-9H2,1H3	299.399	3.1274	87.9845	5	2	49.56	3	5	3	0	0.1875	21	0	0	1	2	5	0	0	0	0.395505498	0.136982088	0.136982088	-0.395505498	16	5	21	0.761904762	0.238095238	0
Cai2007-15c	CN(C)C(C=C1)=CC=C1C2=CN3C(C=CC(SCC(N)=O)=C3)=N2	10.1021/jm0702231			391	391		76	-6.407823243	[3H]PiB	AD	b	AD brain cerebral gray matter homogenates	The AD brain tissue was homogenized in PBS (1:50 in vol) to generate a suspension, which was dispensed into 1.0 mL and stored in a −70 °C freezer for further use.		Radioligand Displacement	For each assay, a new vial with 1.0 mL of AD brain homogenate suspension was thawed, vortexed, and diluted with PBS until 10.0 mL. An amount of 100 μL of suspension was used in each tube. [3H]PIB solution (1 mCi/mL) was diluted with PBS to give an intermediate stock solution (10 nCi/μL), which was further diluted with PBS to yield a dilute stock solution (1 nCi/μL). An amount of 100 μL was used i…	InChI=1S/C17H18N4OS/c1-20(2)13-5-3-12(4-6-13)15-10-21-9-14(23-11-16(18)22)7-8-17(21)19-15/h3-10H,11H2,1-2H3,(H2,18,22)	InChI=1S/C17H18N4OS/c1-20(2)13-5-3-12(4-6-13)15-10-21-9-14(23-11-16(18)22)7-8-17(21)19-15/h3-10H,11H2,1-2H3,(H2,18,22)	326.425	2.6447	94.8734	5	1	63.63	3	5	3	0	0.176470588	23	0	0	1	2	6	0	0	0	0.377660894	0.227284369	0.227284369	-0.377660894	17	6	23	0.739130435	0.260869565	0
Cai2007-15d	CN(C)C(C=C1)=CC=C1C2=CN3C(C=CC(SCC4=CC=C(OC)C=C4)=C3)=N2	10.1021/jm0702231			8.3	8.3		1.8	-8.080921908	[3H]PiB	AD	b	AD brain cerebral gray matter homogenates	The AD brain tissue was homogenized in PBS (1:50 in vol) to generate a suspension, which was dispensed into 1.0 mL and stored in a −70 °C freezer for further use.		Radioligand Displacement	For each assay, a new vial with 1.0 mL of AD brain homogenate suspension was thawed, vortexed, and diluted with PBS until 10.0 mL. An amount of 100 μL of suspension was used in each tube. [3H]PIB solution (1 mCi/mL) was diluted with PBS to give an intermediate stock solution (10 nCi/μL), which was further diluted with PBS to yield a dilute stock solution (1 nCi/μL). An amount of 100 μL was used i…	InChI=1S/C23H23N3OS/c1-25(2)19-8-6-18(7-9-19)22-15-26-14-21(12-13-23(26)24-22)28-16-17-4-10-20(27-3)11-5-17/h4-15H,16H2,1-3H3	InChI=1S/C23H23N3OS/c1-25(2)19-8-6-18(7-9-19)22-15-26-14-21(12-13-23(26)24-22)28-16-17-4-10-20(27-3)11-5-17/h4-15H,16H2,1-3H3	389.524	5.3682	117.51	5	0	29.77	4	6	4	0	0.173913043	28	0	0	2	2	5	0	0	0	0.496768211	0.136982091	0.136982091	-0.496768211	23	5	28	0.821428571	0.178571429	0
Cai2007-15e	CN(C)C(C=C1)=CC=C1C2=CN3C(C=CC(SCCO)=C3)=N2	10.1021/jm0702231			88	88		6	-7.055517328	[3H]PiB	AD	b	AD brain cerebral gray matter homogenates	The AD brain tissue was homogenized in PBS (1:50 in vol) to generate a suspension, which was dispensed into 1.0 mL and stored in a −70 °C freezer for further use.		Radioligand Displacement	For each assay, a new vial with 1.0 mL of AD brain homogenate suspension was thawed, vortexed, and diluted with PBS until 10.0 mL. An amount of 100 μL of suspension was used in each tube. [3H]PIB solution (1 mCi/mL) was diluted with PBS to give an intermediate stock solution (10 nCi/μL), which was further diluted with PBS to yield a dilute stock solution (1 nCi/μL). An amount of 100 μL was used i…	InChI=1S/C17H19N3OS/c1-19(2)14-5-3-13(4-6-14)16-12-20-11-15(22-10-9-21)7-8-17(20)18-16/h3-8,11-12,21H,9-10H2,1-2H3	InChI=1S/C17H19N3OS/c1-19(2)14-5-3-13(4-6-14)16-12-20-11-15(22-10-9-21)7-8-17(20)18-16/h3-8,11-12,21H,9-10H2,1-2H3	313.426	3.1517	92.7648	5	1	40.77	3	5	3	0	0.235294118	22	0	0	1	2	5	0	0	0	0.395505498	0.136982088	0.136982088	-0.395505498	17	5	22	0.772727273	0.227272727	0
FEM-IMPY	CN(CCF)C(C=C1)=CC=C1C2=CN3C(C=CC(I)=C3)=N2	10.1021/jm0702231			31	31		5	-7.508638306	[3H]PiB	AD	b	AD brain cerebral gray matter homogenates	The AD brain tissue was homogenized in PBS (1:50 in vol) to generate a suspension, which was dispensed into 1.0 mL and stored in a −70 °C freezer for further use.		Radioligand Displacement	For each assay, a new vial with 1.0 mL of AD brain homogenate suspension was thawed, vortexed, and diluted with PBS until 10.0 mL. An amount of 100 μL of suspension was used in each tube. [3H]PIB solution (1 mCi/mL) was diluted with PBS to give an intermediate stock solution (10 nCi/μL), which was further diluted with PBS to yield a dilute stock solution (1 nCi/μL). An amount of 100 μL was used i…	InChI=1S/C16H15FIN3/c1-20(9-8-17)14-5-2-12(3-6-14)15-11-21-10-13(18)4-7-16(21)19-15/h2-7,10-11H,8-9H2,1H3	InChI=1S/C16H15FIN3/c1-20(9-8-17)14-5-2-12(3-6-14)15-11-21-10-13(18)4-7-16(21)19-15/h2-7,10-11H,8-9H2,1H3	395.219	4.0116	92.59	3	0	20.54	3	4	3	0	0.1875	21	0	0	1	2	5	0	0	0	0.371975104	0.136976662	0.136976662	-0.371975104	16	3	21	0.761904762	0.142857143	0
FPM-IMPY	CN(CCCF)C(C=C1)=CC=C1C2=CN3C(C=CC(I)=C3)=N2	10.1021/jm0702231			41	41		5	-7.387216143	[3H]PiB	AD	b	AD brain cerebral gray matter homogenates	The AD brain tissue was homogenized in PBS (1:50 in vol) to generate a suspension, which was dispensed into 1.0 mL and stored in a −70 °C freezer for further use.		Radioligand Displacement	For each assay, a new vial with 1.0 mL of AD brain homogenate suspension was thawed, vortexed, and diluted with PBS until 10.0 mL. An amount of 100 μL of suspension was used in each tube. [3H]PIB solution (1 mCi/mL) was diluted with PBS to give an intermediate stock solution (10 nCi/μL), which was further diluted with PBS to yield a dilute stock solution (1 nCi/μL). An amount of 100 μL was used i…	InChI=1S/C17H17FIN3/c1-21(10-2-9-18)15-6-3-13(4-7-15)16-12-22-11-14(19)5-8-17(22)20-16/h3-8,11-12H,2,9-10H2,1H3	InChI=1S/C17H17FIN3/c1-21(10-2-9-18)15-6-3-13(4-7-15)16-12-22-11-14(19)5-8-17(22)20-16/h3-8,11-12H,2,9-10H2,1H3	409.246	4.4017	97.207	3	0	20.54	3	5	3	0	0.235294118	22	0	0	1	2	5	0	0	0	0.374501494	0.136976662	0.136976662	-0.374501494	17	3	22	0.772727273	0.136363636	0
Cai2007-17a	CN(C)C(C=C1)=CC=C1C2=CN3C(N=CC(Cl)=C3)=N2	10.1021/jm0702231			88	88		22	-7.055517328	[3H]PiB	AD	b	AD brain cerebral gray matter homogenates	The AD brain tissue was homogenized in PBS (1:50 in vol) to generate a suspension, which was dispensed into 1.0 mL and stored in a −70 °C freezer for further use.		Radioligand Displacement	For each assay, a new vial with 1.0 mL of AD brain homogenate suspension was thawed, vortexed, and diluted with PBS until 10.0 mL. An amount of 100 μL of suspension was used in each tube. [3H]PIB solution (1 mCi/mL) was diluted with PBS to give an intermediate stock solution (10 nCi/μL), which was further diluted with PBS to yield a dilute stock solution (1 nCi/μL). An amount of 100 μL was used i…	InChI=1S/C14H13ClN4/c1-18(2)12-5-3-10(4-6-12)13-9-19-8-11(15)7-16-14(19)17-13/h3-9H,1-2H3	InChI=1S/C14H13ClN4/c1-18(2)12-5-3-10(4-6-12)13-9-19-8-11(15)7-16-14(19)17-13/h3-9H,1-2H3	272.739	3.1157	77.76	4	0	33.43	3	2	3	0	0.142857143	19	0	0	1	2	5	0	0	0	0.377660894	0.233862927	0.233862927	-0.377660894	14	4	19	0.736842105	0.210526316	0
Cai2007-17b	CN(C)C(C=C1)=CC=C1C2=CN3C(C=NC(Cl)=C3)=N2	10.1021/jm0702231			147	147		20	-6.832682665	[3H]PiB	AD	b	AD brain cerebral gray matter homogenates	The AD brain tissue was homogenized in PBS (1:50 in vol) to generate a suspension, which was dispensed into 1.0 mL and stored in a −70 °C freezer for further use.		Radioligand Displacement	For each assay, a new vial with 1.0 mL of AD brain homogenate suspension was thawed, vortexed, and diluted with PBS until 10.0 mL. An amount of 100 μL of suspension was used in each tube. [3H]PIB solution (1 mCi/mL) was diluted with PBS to give an intermediate stock solution (10 nCi/μL), which was further diluted with PBS to yield a dilute stock solution (1 nCi/μL). An amount of 100 μL was used i…	InChI=1S/C14H13ClN4/c1-18(2)11-5-3-10(4-6-11)12-8-19-9-13(15)16-7-14(19)17-12/h3-9H,1-2H3	InChI=1S/C14H13ClN4/c1-18(2)11-5-3-10(4-6-11)12-8-19-9-13(15)16-7-14(19)17-12/h3-9H,1-2H3	272.739	3.1157	77.76	4	0	33.43	3	2	3	0	0.142857143	19	0	0	1	2	5	0	0	0	0.377660894	0.155590679	0.155590679	-0.377660894	14	4	19	0.736842105	0.210526316	0
Cai2007-12j	CN(C)C(C=C1)=CC=C1C2=CN3C(C(C#N)=CC(Br)=C3)=N2	10.1021/jm0702231			>180	>180				[3H]PiB	AD	b	AD brain cerebral gray matter homogenates	The AD brain tissue was homogenized in PBS (1:50 in vol) to generate a suspension, which was dispensed into 1.0 mL and stored in a −70 °C freezer for further use.		Radioligand Displacement	For each assay, a new vial with 1.0 mL of AD brain homogenate suspension was thawed, vortexed, and diluted with PBS until 10.0 mL. An amount of 100 μL of suspension was used in each tube. [3H]PIB solution (1 mCi/mL) was diluted with PBS to give an intermediate stock solution (10 nCi/μL), which was further diluted with PBS to yield a dilute stock solution (1 nCi/μL). An amount of 100 μL was used i…	InChI=1S/C16H13BrN4/c1-20(2)14-5-3-11(4-6-14)15-10-21-9-13(17)7-12(8-18)16(21)19-15/h3-7,9-10H,1-2H3	InChI=1S/C16H13BrN4/c1-20(2)14-5-3-11(4-6-14)15-10-21-9-13(17)7-12(8-18)16(21)19-15/h3-7,9-10H,1-2H3	341.212	3.70148	87.37	4	0	44.33	3	2	3	0	0.125	21	0	0	1	2	5	0	0	0	0.377660894	0.154992138	0.154992138	-0.377660894	16	4	21	0.761904762	0.19047619	1
AV1451 (T807)	FC1=CC=C(C2=CC(NC3=C4C=NC=C3)=C4C=C2)C=N1	10.1021/acschemneuro6b00051			>1000	>1000				[3H]THK-523	AD	b	AD brain homogenate	Postmortem brain tissues from an autopsy-confirmed AD case and a healthy control were obtained from the Human Brain Collection Core (HBCC), NIH.		Radioligand Displacement	Human AD brain tissue was homogenized in assay medium (0.1% Tween-20 in PBS) at 1:500 dilution in volume, and aliquots of this suspension (100 μL) were added to each of four tubes (total 48 in a rack). A solution of tritiated radioligand ([3H]THK-523, [3H]T807 or [3H]PIB); 10 Bq/μL) in assay medium (100 μL) was added to each tube. Nonradioactive ligand (THK-523, T807 or PIB) or test compound was …	InChI=1S/C16H10FN3/c17-16-4-2-11(8-19-16)10-1-3-12-13-9-18-6-5-14(13)20-15(12)7-10/h1-9,20H	InChI=1S/C16H10FN3/c17-16-4-2-11(8-19-16)10-1-3-12-13-9-18-6-5-14(13)20-15(12)7-10/h1-9,20H	263.275	3.9172	76.7887	2	1	41.57	4	1	4	0	0	20	0	0	1	3	4	0	0	0	0.354400847	0.21232651	0.21232651	-0.354400847	16	3	20	0.8	0.15	0
AV1451 (T807)	FC1=CC=C(C2=CC(NC3=C4C=NC=C3)=C4C=C2)C=N1	10.1021/acschemneuro6b00051			>1000	>1000				[3H]PiB	AD	b	AD brain homogenate	Postmortem brain tissues from an autopsy-confirmed AD case and a healthy control were obtained from the Human Brain Collection Core (HBCC), NIH.		Radioligand Displacement	Human AD brain tissue was homogenized in assay medium (0.1% Tween-20 in PBS) at 1:500 dilution in volume, and aliquots of this suspension (100 μL) were added to each of four tubes (total 48 in a rack). A solution of tritiated radioligand ([3H]THK-523, [3H]T807 or [3H]PIB); 10 Bq/μL) in assay medium (100 μL) was added to each tube. Nonradioactive ligand (THK-523, T807 or PIB) or test compound was …	InChI=1S/C16H10FN3/c17-16-4-2-11(8-19-16)10-1-3-12-13-9-18-6-5-14(13)20-15(12)7-10/h1-9,20H	InChI=1S/C16H10FN3/c17-16-4-2-11(8-19-16)10-1-3-12-13-9-18-6-5-14(13)20-15(12)7-10/h1-9,20H	263.275	3.9172	76.7887	2	1	41.57	4	1	4	0	0	20	0	0	1	3	4	0	0	0	0.354400847	0.21232651	0.21232651	-0.354400847	16	3	20	0.8	0.15	0
THK523	FCCOC1=CC=C(N=C(C2=CC=C(N)C=C2)C=C3)C3=C1	10.1021/acschemneuro.6b00051			>1000	>1000				[3H]PiB	AD	b	AD brain homogenate	Postmortem brain tissues from an autopsy-confirmed AD case and a healthy control were obtained from the Human Brain Collection Core (HBCC), NIH.		Radioligand Displacement	Human AD brain tissue was homogenized in assay medium (0.1% Tween-20 in PBS) at 1:500 dilution in volume, and aliquots of this suspension (100 μL) were added to each of four tubes (total 48 in a rack). A solution of tritiated radioligand ([3H]THK-523, [3H]T807 or [3H]PIB); 10 Bq/μL) in assay medium (100 μL) was added to each tube. Nonradioactive ligand (THK-523, T807 or PIB) or test compound was …	InChI=1S/C17H15FN2O/c18-9-10-21-15-6-8-17-13(11-15)3-7-16(20-17)12-1-4-14(19)5-2-12/h1-8,11H,9-10,19H2	InChI=1S/C17H15FN2O/c18-9-10-21-15-6-8-17-13(11-15)3-7-16(20-17)12-1-4-14(19)5-2-12/h1-8,11H,9-10,19H2	282.318	3.8323	83.0614	3	1	48.14	3	4	3	0	0.117647059	21	0	0	2	1	4	0	0	0	0.490848354	0.123411869	0.123411869	-0.490848354	17	3	21	0.80952381	0.142857143	0
Cai10b	NC(C=C1)=CC=C1C(C=C2)=NC(C2=C3)=CC=C3OCCOCCF	10.1021/acschemneuro.6b00051			>1000	>1000				[3H]T807	AD	b	AD brain homogenate	Postmortem brain tissues from an autopsy-confirmed AD case and a healthy control were obtained from the Human Brain Collection Core (HBCC), NIH.		Radioligand Displacement	Human AD brain tissue was homogenized in assay medium (0.1% Tween-20 in PBS) at 1:500 dilution in volume, and aliquots of this suspension (100 μL) were added to each of four tubes (total 48 in a rack). A solution of tritiated radioligand ([3H]THK-523, [3H]T807 or [3H]PIB); 10 Bq/μL) in assay medium (100 μL) was added to each tube. Nonradioactive ligand (THK-523, T807 or PIB) or test compound was …	InChI=1S/C19H19FN2O2/c20-9-10-23-11-12-24-17-6-8-19-15(13-17)3-7-18(22-19)14-1-4-16(21)5-2-14/h1-8,13H,9-12,21H2	InChI=1S/C19H19FN2O2/c20-9-10-23-11-12-24-17-6-8-19-15(13-17)3-7-18(22-19)14-1-4-16(21)5-2-14/h1-8,13H,9-12,21H2	326.371	3.8489	93.8804	4	1	57.37	3	7	3	0	0.210526316	24	0	0	2	1	5	0	0	0	0.491170753	0.11967292	0.11967292	-0.491170753	19	4	24	0.791666667	0.166666667	0
Cai10b	NC(C=C1)=CC=C1C(C=C2)=NC(C2=C3)=CC=C3OCCOCCF	10.1021/acschemneuro.6b00051			>1000	>1000				[3H]PiB	AD	b	AD brain homogenate	Postmortem brain tissues from an autopsy-confirmed AD case and a healthy control were obtained from the Human Brain Collection Core (HBCC), NIH.		Radioligand Displacement	Human AD brain tissue was homogenized in assay medium (0.1% Tween-20 in PBS) at 1:500 dilution in volume, and aliquots of this suspension (100 μL) were added to each of four tubes (total 48 in a rack). A solution of tritiated radioligand ([3H]THK-523, [3H]T807 or [3H]PIB); 10 Bq/μL) in assay medium (100 μL) was added to each tube. Nonradioactive ligand (THK-523, T807 or PIB) or test compound was …	InChI=1S/C19H19FN2O2/c20-9-10-23-11-12-24-17-6-8-19-15(13-17)3-7-18(22-19)14-1-4-16(21)5-2-14/h1-8,13H,9-12,21H2	InChI=1S/C19H19FN2O2/c20-9-10-23-11-12-24-17-6-8-19-15(13-17)3-7-18(22-19)14-1-4-16(21)5-2-14/h1-8,13H,9-12,21H2	326.371	3.8489	93.8804	4	1	57.37	3	7	3	0	0.210526316	24	0	0	2	1	5	0	0	0	0.491170753	0.11967292	0.11967292	-0.491170753	19	4	24	0.791666667	0.166666667	0
Cai10c	NC(C=C1)=CC=C1C(C=C2)=NC(C2=C3)=CC=C3OCCOCCOCCF	10.1021/acschemneuro.6b00051			>1000	>1000				[3H]THK-523	AD	b	AD brain homogenate	Postmortem brain tissues from an autopsy-confirmed AD case and a healthy control were obtained from the Human Brain Collection Core (HBCC), NIH.		Radioligand Displacement	Human AD brain tissue was homogenized in assay medium (0.1% Tween-20 in PBS) at 1:500 dilution in volume, and aliquots of this suspension (100 μL) were added to each of four tubes (total 48 in a rack). A solution of tritiated radioligand ([3H]THK-523, [3H]T807 or [3H]PIB); 10 Bq/μL) in assay medium (100 μL) was added to each tube. Nonradioactive ligand (THK-523, T807 or PIB) or test compound was …	InChI=1S/C21H23FN2O3/c22-9-10-25-11-12-26-13-14-27-19-6-8-21-17(15-19)3-7-20(24-21)16-1-4-18(23)5-2-16/h1-8,15H,9-14,23H2	InChI=1S/C21H23FN2O3/c22-9-10-25-11-12-26-13-14-27-19-6-8-21-17(15-19)3-7-20(24-21)16-1-4-18(23)5-2-16/h1-8,15H,9-14,23H2	370.424	3.8655	104.6994	5	1	66.6	3	10	3	0	0.285714286	27	0	0	2	1	6	0	0	0	0.491170754	0.11967292	0.11967292	-0.491170754	21	5	27	0.777777778	0.185185185	0
Cai10c	NC(C=C1)=CC=C1C(C=C2)=NC(C2=C3)=CC=C3OCCOCCOCCF	10.1021/acschemneuro.6b00051			>1000	>1000				[3H]T807	AD	b	AD brain homogenate	Postmortem brain tissues from an autopsy-confirmed AD case and a healthy control were obtained from the Human Brain Collection Core (HBCC), NIH.		Radioligand Displacement	Human AD brain tissue was homogenized in assay medium (0.1% Tween-20 in PBS) at 1:500 dilution in volume, and aliquots of this suspension (100 μL) were added to each of four tubes (total 48 in a rack). A solution of tritiated radioligand ([3H]THK-523, [3H]T807 or [3H]PIB); 10 Bq/μL) in assay medium (100 μL) was added to each tube. Nonradioactive ligand (THK-523, T807 or PIB) or test compound was …	InChI=1S/C21H23FN2O3/c22-9-10-25-11-12-26-13-14-27-19-6-8-21-17(15-19)3-7-20(24-21)16-1-4-18(23)5-2-16/h1-8,15H,9-14,23H2	InChI=1S/C21H23FN2O3/c22-9-10-25-11-12-26-13-14-27-19-6-8-21-17(15-19)3-7-20(24-21)16-1-4-18(23)5-2-16/h1-8,15H,9-14,23H2	370.424	3.8655	104.6994	5	1	66.6	3	10	3	0	0.285714286	27	0	0	2	1	6	0	0	0	0.491170754	0.11967292	0.11967292	-0.491170754	21	5	27	0.777777778	0.185185185	0
Cai10c	NC(C=C1)=CC=C1C(C=C2)=NC(C2=C3)=CC=C3OCCOCCOCCF	10.1021/acschemneuro.6b00051			>1000	>1000				[3H]PiB	AD	b	AD brain homogenate	Postmortem brain tissues from an autopsy-confirmed AD case and a healthy control were obtained from the Human Brain Collection Core (HBCC), NIH.		Radioligand Displacement	Human AD brain tissue was homogenized in assay medium (0.1% Tween-20 in PBS) at 1:500 dilution in volume, and aliquots of this suspension (100 μL) were added to each of four tubes (total 48 in a rack). A solution of tritiated radioligand ([3H]THK-523, [3H]T807 or [3H]PIB); 10 Bq/μL) in assay medium (100 μL) was added to each tube. Nonradioactive ligand (THK-523, T807 or PIB) or test compound was …	InChI=1S/C21H23FN2O3/c22-9-10-25-11-12-26-13-14-27-19-6-8-21-17(15-19)3-7-20(24-21)16-1-4-18(23)5-2-16/h1-8,15H,9-14,23H2	InChI=1S/C21H23FN2O3/c22-9-10-25-11-12-26-13-14-27-19-6-8-21-17(15-19)3-7-20(24-21)16-1-4-18(23)5-2-16/h1-8,15H,9-14,23H2	370.424	3.8655	104.6994	5	1	66.6	3	10	3	0	0.285714286	27	0	0	2	1	6	0	0	0	0.491170754	0.11967292	0.11967292	-0.491170754	21	5	27	0.777777778	0.185185185	0
Cai10d	NC(C=C1)=CC=C1C(C=C2)=NC(C2=C3)=CC=C3OCCOCCOCCOCCF	10.1021/acschemneuro.6b00051			>1000	>1000				[3H]THK-523	AD	b	AD brain homogenate	Postmortem brain tissues from an autopsy-confirmed AD case and a healthy control were obtained from the Human Brain Collection Core (HBCC), NIH.		Radioligand Displacement	Human AD brain tissue was homogenized in assay medium (0.1% Tween-20 in PBS) at 1:500 dilution in volume, and aliquots of this suspension (100 μL) were added to each of four tubes (total 48 in a rack). A solution of tritiated radioligand ([3H]THK-523, [3H]T807 or [3H]PIB); 10 Bq/μL) in assay medium (100 μL) was added to each tube. Nonradioactive ligand (THK-523, T807 or PIB) or test compound was …	InChI=1S/C23H27FN2O4/c24-9-10-27-11-12-28-13-14-29-15-16-30-21-6-8-23-19(17-21)3-7-22(26-23)18-1-4-20(25)5-2-18/h1-8,17H,9-16,25H2	InChI=1S/C23H27FN2O4/c24-9-10-27-11-12-28-13-14-29-15-16-30-21-6-8-23-19(17-21)3-7-22(26-23)18-1-4-20(25)5-2-18/h1-8,17H,9-16,25H2	414.477	3.8821	115.5184	6	1	75.83	3	13	3	0	0.347826087	30	0	0	2	1	7	0	0	0	0.491170754	0.11967292	0.11967292	-0.491170754	23	6	30	0.766666667	0.2	0
Cai10d	NC(C=C1)=CC=C1C(C=C2)=NC(C2=C3)=CC=C3OCCOCCOCCOCCF	10.1021/acschemneuro.6b00051			>1000	>1000				[3H]T807	AD	b	AD brain homogenate	Postmortem brain tissues from an autopsy-confirmed AD case and a healthy control were obtained from the Human Brain Collection Core (HBCC), NIH.		Radioligand Displacement	Human AD brain tissue was homogenized in assay medium (0.1% Tween-20 in PBS) at 1:500 dilution in volume, and aliquots of this suspension (100 μL) were added to each of four tubes (total 48 in a rack). A solution of tritiated radioligand ([3H]THK-523, [3H]T807 or [3H]PIB); 10 Bq/μL) in assay medium (100 μL) was added to each tube. Nonradioactive ligand (THK-523, T807 or PIB) or test compound was …	InChI=1S/C23H27FN2O4/c24-9-10-27-11-12-28-13-14-29-15-16-30-21-6-8-23-19(17-21)3-7-22(26-23)18-1-4-20(25)5-2-18/h1-8,17H,9-16,25H2	InChI=1S/C23H27FN2O4/c24-9-10-27-11-12-28-13-14-29-15-16-30-21-6-8-23-19(17-21)3-7-22(26-23)18-1-4-20(25)5-2-18/h1-8,17H,9-16,25H2	414.477	3.8821	115.5184	6	1	75.83	3	13	3	0	0.347826087	30	0	0	2	1	7	0	0	0	0.491170754	0.11967292	0.11967292	-0.491170754	23	6	30	0.766666667	0.2	0
Cai10d	NC(C=C1)=CC=C1C(C=C2)=NC(C2=C3)=CC=C3OCCOCCOCCOCCF	10.1021/acschemneuro.6b00051			>1000	>1000				[3H]PiB	AD	b	AD brain homogenate	Postmortem brain tissues from an autopsy-confirmed AD case and a healthy control were obtained from the Human Brain Collection Core (HBCC), NIH.		Radioligand Displacement	Human AD brain tissue was homogenized in assay medium (0.1% Tween-20 in PBS) at 1:500 dilution in volume, and aliquots of this suspension (100 μL) were added to each of four tubes (total 48 in a rack). A solution of tritiated radioligand ([3H]THK-523, [3H]T807 or [3H]PIB); 10 Bq/μL) in assay medium (100 μL) was added to each tube. Nonradioactive ligand (THK-523, T807 or PIB) or test compound was …	InChI=1S/C23H27FN2O4/c24-9-10-27-11-12-28-13-14-29-15-16-30-21-6-8-23-19(17-21)3-7-22(26-23)18-1-4-20(25)5-2-18/h1-8,17H,9-16,25H2	InChI=1S/C23H27FN2O4/c24-9-10-27-11-12-28-13-14-29-15-16-30-21-6-8-23-19(17-21)3-7-22(26-23)18-1-4-20(25)5-2-18/h1-8,17H,9-16,25H2	414.477	3.8821	115.5184	6	1	75.83	3	13	3	0	0.347826087	30	0	0	2	1	7	0	0	0	0.491170754	0.11967292	0.11967292	-0.491170754	23	6	30	0.766666667	0.2	0
Cai10e	NC(C=C1)=CC=C1C(C=C2)=NC(C2=C3)=CC=C3OCCOCCOCCOCCOCCF	10.1021/acschemneuro.6b00051			>1000	>1000				[3H]THK-523	AD	b	AD brain homogenate	Postmortem brain tissues from an autopsy-confirmed AD case and a healthy control were obtained from the Human Brain Collection Core (HBCC), NIH.		Radioligand Displacement	Human AD brain tissue was homogenized in assay medium (0.1% Tween-20 in PBS) at 1:500 dilution in volume, and aliquots of this suspension (100 μL) were added to each of four tubes (total 48 in a rack). A solution of tritiated radioligand ([3H]THK-523, [3H]T807 or [3H]PIB); 10 Bq/μL) in assay medium (100 μL) was added to each tube. Nonradioactive ligand (THK-523, T807 or PIB) or test compound was …	InChI=1S/C25H31FN2O5/c26-9-10-29-11-12-30-13-14-31-15-16-32-17-18-33-23-6-8-25-21(19-23)3-7-24(28-25)20-1-4-22(27)5-2-20/h1-8,19H,9-18,27H2	InChI=1S/C25H31FN2O5/c26-9-10-29-11-12-30-13-14-31-15-16-32-17-18-33-23-6-8-25-21(19-23)3-7-24(28-25)20-1-4-22(27)5-2-20/h1-8,19H,9-18,27H2	458.53	3.8987	126.3374	7	1	85.06	3	16	3	0	0.4	33	0	0	2	1	8	0	0	0	0.491170754	0.11967292	0.11967292	-0.491170754	25	7	33	0.757575758	0.212121212	0
Cai10f	NC(C=C1)=CC=C1C(C=C2)=NC(C2=C3)=CC=C3OCCOCCOCCOCCOCCOCCF	10.1021/acschemneuro.6b00051			>1000	>1000				[3H]THK-523	AD	b	AD brain homogenate	Postmortem brain tissues from an autopsy-confirmed AD case and a healthy control were obtained from the Human Brain Collection Core (HBCC), NIH.		Radioligand Displacement	Human AD brain tissue was homogenized in assay medium (0.1% Tween-20 in PBS) at 1:500 dilution in volume, and aliquots of this suspension (100 μL) were added to each of four tubes (total 48 in a rack). A solution of tritiated radioligand ([3H]THK-523, [3H]T807 or [3H]PIB); 10 Bq/μL) in assay medium (100 μL) was added to each tube. Nonradioactive ligand (THK-523, T807 or PIB) or test compound was …	InChI=1S/C27H35FN2O6/c28-9-10-31-11-12-32-13-14-33-15-16-34-17-18-35-19-20-36-25-6-8-27-23(21-25)3-7-26(30-27)22-1-4-24(29)5-2-22/h1-8,21H,9-20,29H2	InChI=1S/C27H35FN2O6/c28-9-10-31-11-12-32-13-14-33-15-16-34-17-18-35-19-20-36-25-6-8-27-23(21-25)3-7-26(30-27)22-1-4-24(29)5-2-22/h1-8,21H,9-20,29H2	502.583	3.9153	137.1564	8	1	94.29	3	19	3	0	0.444444444	36	0	0	2	1	9	0	0	0	0.491170754	0.11967292	0.11967292	-0.491170754	27	8	36	0.75	0.222222222	0
AV1451 (T807)	FC1=CC=C(C2=CC(NC3=C4C=NC=C3)=C4C=C2)C=N1	10.1021/acschemneuro6b00051			2.6	2.6		0.7	-8.585026652	[3H]T807	AD	b	AD brain homogenate	Postmortem brain tissues from an autopsy-confirmed AD case and a healthy control were obtained from the Human Brain Collection Core (HBCC), NIH.		Radioligand Displacement	Human AD brain tissue was homogenized in assay medium (0.1% Tween-20 in PBS) at 1:500 dilution in volume, and aliquots of this suspension (100 μL) were added to each of four tubes (total 48 in a rack). A solution of tritiated radioligand ([3H]THK-523, [3H]T807 or [3H]PIB); 10 Bq/μL) in assay medium (100 μL) was added to each tube. Nonradioactive ligand (THK-523, T807 or PIB) or test compound was …	InChI=1S/C16H10FN3/c17-16-4-2-11(8-19-16)10-1-3-12-13-9-18-6-5-14(13)20-15(12)7-10/h1-9,20H	InChI=1S/C16H10FN3/c17-16-4-2-11(8-19-16)10-1-3-12-13-9-18-6-5-14(13)20-15(12)7-10/h1-9,20H	263.275	3.9172	76.7887	2	1	41.57	4	1	4	0	0	20	0	0	1	3	4	0	0	0	0.354400847	0.21232651	0.21232651	-0.354400847	16	3	20	0.8	0.15	0
Cai12a	NC(C=C1)=CC=C1C(C=C2)=NC(C2=C3)=CC=C3OCCOCCC4C(CCCC4=O)=O	10.1021/acschemneuro.6b00051			>1000	>1000				[3H]T807	AD	b	AD brain homogenate	Postmortem brain tissues from an autopsy-confirmed AD case and a healthy control were obtained from the Human Brain Collection Core (HBCC), NIH.		Radioligand Displacement	Human AD brain tissue was homogenized in assay medium (0.1% Tween-20 in PBS) at 1:500 dilution in volume, and aliquots of this suspension (100 μL) were added to each of four tubes (total 48 in a rack). A solution of tritiated radioligand ([3H]THK-523, [3H]T807 or [3H]PIB); 10 Bq/μL) in assay medium (100 μL) was added to each tube. Nonradioactive ligand (THK-523, T807 or PIB) or test compound was …	InChI=1S/C25H26N2O4/c26-19-7-4-17(5-8-19)22-10-6-18-16-20(9-11-23(18)27-22)31-15-14-30-13-12-21-24(28)2-1-3-25(21)29/h4-11,16,21H,1-3,12-15,26H2	InChI=1S/C25H26N2O4/c26-19-7-4-17(5-8-19)22-10-6-18-16-20(9-11-23(18)27-22)31-15-14-30-13-12-21-24(28)2-1-3-25(21)29/h4-11,16,21H,1-3,12-15,26H2	418.493	4.2078	119.8774	6	1	91.51	4	8	3	1	0.32	31	1	0	2	1	6	1	0	1	0.491170773	0.142936308	0.142936308	-0.491170773	25	6	31	0.806451613	0.193548387	0
[3H]THK523	FCCOC1=CC=C(N=C(C2=CC=C(N)C=C2)C=C3)C3=C1	10.1021/acschemneuro.6b00051		3.5		3.5		3.4	-8.455931956		AD	b	AD brain homogenate	Postmortem brain tissues from an autopsy-confirmed AD case and a healthy control were obtained from the Human Brain Collection Core (HBCC), NIH.		Radioligand Saturation	Human AD brain tissue was homogenized in assay medium (0.1% Tween-20 in PBS) at 1:500 dilution in volume, and aliquots of this suspension (100 μL) were added to each of four tubes (total 48 in a rack). A solution of tritiated radioligand ([3H]THK-523, [3H]T807 or [3H]PIB); 10 Bq/μL) in assay medium (100 μL) was added to each tube. Nonradioactive ligand (THK-523, T807 or PIB) or test compound was …	InChI=1S/C17H15FN2O/c18-9-10-21-15-6-8-17-13(11-15)3-7-16(20-17)12-1-4-14(19)5-2-12/h1-8,11H,9-10,19H2	InChI=1S/C17H15FN2O/c18-9-10-21-15-6-8-17-13(11-15)3-7-16(20-17)12-1-4-14(19)5-2-12/h1-8,11H,9-10,19H2	282.318	3.8323	83.0614	3	1	48.14	3	4	3	0	0.117647059	21	0	0	2	1	4	0	0	0	0.490848354	0.123411869	0.123411869	-0.490848354	17	3	21	0.80952381	0.142857143	0
[18F]THK523	FCCOC1=CC=C(N=C(C2=CC=C(N)C=C2)C=C3)C3=C1	10.1021/acschemneuro.6b00051		4.6		4.6		1.8	-8.337242168		AD	b	AD brain homogenate	Postmortem brain tissues from an autopsy-confirmed AD case and a healthy control were obtained from the Human Brain Collection Core (HBCC), NIH.		Radioligand Saturation	Human AD brain tissue was homogenized in assay medium (0.1% Tween-20 in PBS) at 1:500 dilution in volume, and aliquots of this suspension (100 μL) were added to each of four tubes (total 48 in a rack). A solution of tritiated radioligand ([3H]THK-523, [3H]T807 or [3H]PIB); 10 Bq/μL) in assay medium (100 μL) was added to each tube. Nonradioactive ligand (THK-523, T807 or PIB) or test compound was …	InChI=1S/C17H15FN2O/c18-9-10-21-15-6-8-17-13(11-15)3-7-16(20-17)12-1-4-14(19)5-2-12/h1-8,11H,9-10,19H2	InChI=1S/C17H15FN2O/c18-9-10-21-15-6-8-17-13(11-15)3-7-16(20-17)12-1-4-14(19)5-2-12/h1-8,11H,9-10,19H2	282.318	3.8323	83.0614	3	1	48.14	3	4	3	0	0.117647059	21	0	0	2	1	4	0	0	0	0.490848354	0.123411869	0.123411869	-0.490848354	17	3	21	0.80952381	0.142857143	0
THK523	FCCOC1=CC=C(N=C(C2=CC=C(N)C=C2)C=C3)C3=C1	10.1021/acschemneuro.6b00051			51	51		22	-7.292429824	[3H]THK-523	AD	b	AD brain homogenate	Postmortem brain tissues from an autopsy-confirmed AD case and a healthy control were obtained from the Human Brain Collection Core (HBCC), NIH.		Radioligand Displacement	Human AD brain tissue was homogenized in assay medium (0.1% Tween-20 in PBS) at 1:500 dilution in volume, and aliquots of this suspension (100 μL) were added to each of four tubes (total 48 in a rack). A solution of tritiated radioligand ([3H]THK-523, [3H]T807 or [3H]PIB); 10 Bq/μL) in assay medium (100 μL) was added to each tube. Nonradioactive ligand (THK-523, T807 or PIB) or test compound was …	InChI=1S/C17H15FN2O/c18-9-10-21-15-6-8-17-13(11-15)3-7-16(20-17)12-1-4-14(19)5-2-12/h1-8,11H,9-10,19H2	InChI=1S/C17H15FN2O/c18-9-10-21-15-6-8-17-13(11-15)3-7-16(20-17)12-1-4-14(19)5-2-12/h1-8,11H,9-10,19H2	282.318	3.8323	83.0614	3	1	48.14	3	4	3	0	0.117647059	21	0	0	2	1	4	0	0	0	0.490848354	0.123411869	0.123411869	-0.490848354	17	3	21	0.80952381	0.142857143	0
THK523	FCCOC1=CC=C(N=C(C2=CC=C(N)C=C2)C=C3)C3=C1	10.1021/acschemneuro.6b00051			425	425		383	-6.37161107	[3H]T807	AD	b	AD brain homogenate	Postmortem brain tissues from an autopsy-confirmed AD case and a healthy control were obtained from the Human Brain Collection Core (HBCC), NIH.		Radioligand Displacement	Human AD brain tissue was homogenized in assay medium (0.1% Tween-20 in PBS) at 1:500 dilution in volume, and aliquots of this suspension (100 μL) were added to each of four tubes (total 48 in a rack). A solution of tritiated radioligand ([3H]THK-523, [3H]T807 or [3H]PIB); 10 Bq/μL) in assay medium (100 μL) was added to each tube. Nonradioactive ligand (THK-523, T807 or PIB) or test compound was …	InChI=1S/C17H15FN2O/c18-9-10-21-15-6-8-17-13(11-15)3-7-16(20-17)12-1-4-14(19)5-2-12/h1-8,11H,9-10,19H2	InChI=1S/C17H15FN2O/c18-9-10-21-15-6-8-17-13(11-15)3-7-16(20-17)12-1-4-14(19)5-2-12/h1-8,11H,9-10,19H2	282.318	3.8323	83.0614	3	1	48.14	3	4	3	0	0.117647059	21	0	0	2	1	4	0	0	0	0.490848354	0.123411869	0.123411869	-0.490848354	17	3	21	0.80952381	0.142857143	0
Cai12b	NC(C=C1)=CC=C1C(C=C2)=NC(C2=C3)=CC=C3OCCOCCC(C(CC4)=O)C4=O	10.1021/acschemneuro.6b00051			>1000	>1000				[3H]THK-523	AD	b	AD brain homogenate	Postmortem brain tissues from an autopsy-confirmed AD case and a healthy control were obtained from the Human Brain Collection Core (HBCC), NIH.		Radioligand Displacement	Human AD brain tissue was homogenized in assay medium (0.1% Tween-20 in PBS) at 1:500 dilution in volume, and aliquots of this suspension (100 μL) were added to each of four tubes (total 48 in a rack). A solution of tritiated radioligand ([3H]THK-523, [3H]T807 or [3H]PIB); 10 Bq/μL) in assay medium (100 μL) was added to each tube. Nonradioactive ligand (THK-523, T807 or PIB) or test compound was …	InChI=1S/C24H24N2O4/c25-18-4-1-16(2-5-18)21-7-3-17-15-19(6-8-22(17)26-21)30-14-13-29-12-11-20-23(27)9-10-24(20)28/h1-8,15,20H,9-14,25H2	InChI=1S/C24H24N2O4/c25-18-4-1-16(2-5-18)21-7-3-17-15-19(6-8-22(17)26-21)30-14-13-29-12-11-20-23(27)9-10-24(20)28/h1-8,15,20H,9-14,25H2	404.466	3.8177	115.2604	6	1	91.51	4	8	3	1	0.291666667	30	1	0	2	1	6	1	0	1	0.491170773	0.143363278	0.143363278	-0.491170773	24	6	30	0.8	0.2	0
Cai10b	NC(C=C1)=CC=C1C(C=C2)=NC(C2=C3)=CC=C3OCCOCCF	10.1021/acschemneuro.6b00051			28	28		8	-7.552841969	[3H]THK-523	AD	b	AD brain homogenate	Postmortem brain tissues from an autopsy-confirmed AD case and a healthy control were obtained from the Human Brain Collection Core (HBCC), NIH.		Radioligand Displacement	Human AD brain tissue was homogenized in assay medium (0.1% Tween-20 in PBS) at 1:500 dilution in volume, and aliquots of this suspension (100 μL) were added to each of four tubes (total 48 in a rack). A solution of tritiated radioligand ([3H]THK-523, [3H]T807 or [3H]PIB); 10 Bq/μL) in assay medium (100 μL) was added to each tube. Nonradioactive ligand (THK-523, T807 or PIB) or test compound was …	InChI=1S/C19H19FN2O2/c20-9-10-23-11-12-24-17-6-8-19-15(13-17)3-7-18(22-19)14-1-4-16(21)5-2-14/h1-8,13H,9-12,21H2	InChI=1S/C19H19FN2O2/c20-9-10-23-11-12-24-17-6-8-19-15(13-17)3-7-18(22-19)14-1-4-16(21)5-2-14/h1-8,13H,9-12,21H2	326.371	3.8489	93.8804	4	1	57.37	3	7	3	0	0.210526316	24	0	0	2	1	5	0	0	0	0.491170753	0.11967292	0.11967292	-0.491170753	19	4	24	0.791666667	0.166666667	0
Cai12b	NC(C=C1)=CC=C1C(C=C2)=NC(C2=C3)=CC=C3OCCOCCC(C(CC4)=O)C4=O	10.1021/acschemneuro.6b00051			>1000	>1000				[3H]T807	AD	b	AD brain homogenate	Postmortem brain tissues from an autopsy-confirmed AD case and a healthy control were obtained from the Human Brain Collection Core (HBCC), NIH.		Radioligand Displacement	Human AD brain tissue was homogenized in assay medium (0.1% Tween-20 in PBS) at 1:500 dilution in volume, and aliquots of this suspension (100 μL) were added to each of four tubes (total 48 in a rack). A solution of tritiated radioligand ([3H]THK-523, [3H]T807 or [3H]PIB); 10 Bq/μL) in assay medium (100 μL) was added to each tube. Nonradioactive ligand (THK-523, T807 or PIB) or test compound was …	InChI=1S/C24H24N2O4/c25-18-4-1-16(2-5-18)21-7-3-17-15-19(6-8-22(17)26-21)30-14-13-29-12-11-20-23(27)9-10-24(20)28/h1-8,15,20H,9-14,25H2	InChI=1S/C24H24N2O4/c25-18-4-1-16(2-5-18)21-7-3-17-15-19(6-8-22(17)26-21)30-14-13-29-12-11-20-23(27)9-10-24(20)28/h1-8,15,20H,9-14,25H2	404.466	3.8177	115.2604	6	1	91.51	4	8	3	1	0.291666667	30	1	0	2	1	6	1	0	1	0.491170773	0.143363278	0.143363278	-0.491170773	24	6	30	0.8	0.2	0
Cai12b	NC(C=C1)=CC=C1C(C=C2)=NC(C2=C3)=CC=C3OCCOCCC(C(CC4)=O)C4=O	10.1021/acschemneuro.6b00051			>1000	>1000				[3H]PiB	AD	b	AD brain homogenate	Postmortem brain tissues from an autopsy-confirmed AD case and a healthy control were obtained from the Human Brain Collection Core (HBCC), NIH.		Radioligand Displacement	Human AD brain tissue was homogenized in assay medium (0.1% Tween-20 in PBS) at 1:500 dilution in volume, and aliquots of this suspension (100 μL) were added to each of four tubes (total 48 in a rack). A solution of tritiated radioligand ([3H]THK-523, [3H]T807 or [3H]PIB); 10 Bq/μL) in assay medium (100 μL) was added to each tube. Nonradioactive ligand (THK-523, T807 or PIB) or test compound was …	InChI=1S/C24H24N2O4/c25-18-4-1-16(2-5-18)21-7-3-17-15-19(6-8-22(17)26-21)30-14-13-29-12-11-20-23(27)9-10-24(20)28/h1-8,15,20H,9-14,25H2	InChI=1S/C24H24N2O4/c25-18-4-1-16(2-5-18)21-7-3-17-15-19(6-8-22(17)26-21)30-14-13-29-12-11-20-23(27)9-10-24(20)28/h1-8,15,20H,9-14,25H2	404.466	3.8177	115.2604	6	1	91.51	4	8	3	1	0.291666667	30	1	0	2	1	6	1	0	1	0.491170773	0.143363278	0.143363278	-0.491170773	24	6	30	0.8	0.2	0
Cai12c	NC(C=C1)=CC=C1C(C=C2)=NC(C2=C3)=CC=C3OCCOCCN4CCOC4=O	10.1021/acschemneuro.6b00051			>1000	>1000				[3H]T807	AD	b	AD brain homogenate	Postmortem brain tissues from an autopsy-confirmed AD case and a healthy control were obtained from the Human Brain Collection Core (HBCC), NIH.		Radioligand Displacement	Human AD brain tissue was homogenized in assay medium (0.1% Tween-20 in PBS) at 1:500 dilution in volume, and aliquots of this suspension (100 μL) were added to each of four tubes (total 48 in a rack). A solution of tritiated radioligand ([3H]THK-523, [3H]T807 or [3H]PIB); 10 Bq/μL) in assay medium (100 μL) was added to each tube. Nonradioactive ligand (THK-523, T807 or PIB) or test compound was …	InChI=1S/C22H23N3O4/c23-18-4-1-16(2-5-18)20-7-3-17-15-19(6-8-21(17)24-20)28-14-13-27-11-9-25-10-12-29-22(25)26/h1-8,15H,9-14,23H2	InChI=1S/C22H23N3O4/c23-18-4-1-16(2-5-18)20-7-3-17-15-19(6-8-21(17)24-20)28-14-13-27-11-9-25-10-12-29-22(25)26/h1-8,15H,9-14,23H2	393.443	3.3316	110.8264	6	1	86.91	4	8	3	1	0.272727273	29	0	1	2	1	7	0	1	1	0.491170758	0.409518038	0.409518038	-0.491170758	22	7	29	0.75862069	0.24137931	0
Cai12c	NC(C=C1)=CC=C1C(C=C2)=NC(C2=C3)=CC=C3OCCOCCN4CCOC4=O	10.1021/acschemneuro.6b00051			>1000	>1000				[3H]PiB	AD	b	AD brain homogenate	Postmortem brain tissues from an autopsy-confirmed AD case and a healthy control were obtained from the Human Brain Collection Core (HBCC), NIH.		Radioligand Displacement	Human AD brain tissue was homogenized in assay medium (0.1% Tween-20 in PBS) at 1:500 dilution in volume, and aliquots of this suspension (100 μL) were added to each of four tubes (total 48 in a rack). A solution of tritiated radioligand ([3H]THK-523, [3H]T807 or [3H]PIB); 10 Bq/μL) in assay medium (100 μL) was added to each tube. Nonradioactive ligand (THK-523, T807 or PIB) or test compound was …	InChI=1S/C22H23N3O4/c23-18-4-1-16(2-5-18)20-7-3-17-15-19(6-8-21(17)24-20)28-14-13-27-11-9-25-10-12-29-22(25)26/h1-8,15H,9-14,23H2	InChI=1S/C22H23N3O4/c23-18-4-1-16(2-5-18)20-7-3-17-15-19(6-8-21(17)24-20)28-14-13-27-11-9-25-10-12-29-22(25)26/h1-8,15H,9-14,23H2	393.443	3.3316	110.8264	6	1	86.91	4	8	3	1	0.272727273	29	0	1	2	1	7	0	1	1	0.491170758	0.409518038	0.409518038	-0.491170758	22	7	29	0.75862069	0.24137931	0
Cai12d	NC(C=C1)=CC=C1C(C=C2)=NC(C2=C3)=CC=C3OCCOCCN4CCNC4=O	10.1021/acschemneuro.6b00051			>1000	>1000				[3H]T807	AD	b	AD brain homogenate	Postmortem brain tissues from an autopsy-confirmed AD case and a healthy control were obtained from the Human Brain Collection Core (HBCC), NIH.		Radioligand Displacement	Human AD brain tissue was homogenized in assay medium (0.1% Tween-20 in PBS) at 1:500 dilution in volume, and aliquots of this suspension (100 μL) were added to each of four tubes (total 48 in a rack). A solution of tritiated radioligand ([3H]THK-523, [3H]T807 or [3H]PIB); 10 Bq/μL) in assay medium (100 μL) was added to each tube. Nonradioactive ligand (THK-523, T807 or PIB) or test compound was …	InChI=1S/C22H24N4O3/c23-18-4-1-16(2-5-18)20-7-3-17-15-19(6-8-21(17)25-20)29-14-13-28-12-11-26-10-9-24-22(26)27/h1-8,15H,9-14,23H2,(H,24,27)	InChI=1S/C22H24N4O3/c23-18-4-1-16(2-5-18)20-7-3-17-15-19(6-8-21(17)25-20)29-14-13-28-12-11-26-10-9-24-22(26)27/h1-8,15H,9-14,23H2,(H,24,27)	392.459	2.9046	112.8771	5	2	89.71	4	8	3	1	0.272727273	29	0	1	2	1	7	0	1	1	0.491170758	0.317099517	0.317099517	-0.491170758	22	7	29	0.75862069	0.24137931	0
Cai12d	NC(C=C1)=CC=C1C(C=C2)=NC(C2=C3)=CC=C3OCCOCCN4CCNC4=O	10.1021/acschemneuro.6b00051			>1000	>1000				[3H]PiB	AD	b	AD brain homogenate	Postmortem brain tissues from an autopsy-confirmed AD case and a healthy control were obtained from the Human Brain Collection Core (HBCC), NIH.		Radioligand Displacement	Human AD brain tissue was homogenized in assay medium (0.1% Tween-20 in PBS) at 1:500 dilution in volume, and aliquots of this suspension (100 μL) were added to each of four tubes (total 48 in a rack). A solution of tritiated radioligand ([3H]THK-523, [3H]T807 or [3H]PIB); 10 Bq/μL) in assay medium (100 μL) was added to each tube. Nonradioactive ligand (THK-523, T807 or PIB) or test compound was …	InChI=1S/C22H24N4O3/c23-18-4-1-16(2-5-18)20-7-3-17-15-19(6-8-21(17)25-20)29-14-13-28-12-11-26-10-9-24-22(26)27/h1-8,15H,9-14,23H2,(H,24,27)	InChI=1S/C22H24N4O3/c23-18-4-1-16(2-5-18)20-7-3-17-15-19(6-8-21(17)25-20)29-14-13-28-12-11-26-10-9-24-22(26)27/h1-8,15H,9-14,23H2,(H,24,27)	392.459	2.9046	112.8771	5	2	89.71	4	8	3	1	0.272727273	29	0	1	2	1	7	0	1	1	0.491170758	0.317099517	0.317099517	-0.491170758	22	7	29	0.75862069	0.24137931	0
Cai12e	NC(C=C1)=CC=C1C(C=C2)=NC(C2=C3)=CC=C3OCCOCCN4CCSC4=O	10.1021/acschemneuro.6b00051			>1000	>1000				[3H]T807	AD	b	AD brain homogenate	Postmortem brain tissues from an autopsy-confirmed AD case and a healthy control were obtained from the Human Brain Collection Core (HBCC), NIH.		Radioligand Displacement	Human AD brain tissue was homogenized in assay medium (0.1% Tween-20 in PBS) at 1:500 dilution in volume, and aliquots of this suspension (100 μL) were added to each of four tubes (total 48 in a rack). A solution of tritiated radioligand ([3H]THK-523, [3H]T807 or [3H]PIB); 10 Bq/μL) in assay medium (100 μL) was added to each tube. Nonradioactive ligand (THK-523, T807 or PIB) or test compound was …	InChI=1S/C22H23N3O3S/c23-18-4-1-16(2-5-18)20-7-3-17-15-19(6-8-21(17)24-20)28-13-12-27-11-9-25-10-14-29-22(25)26/h1-8,15H,9-14,23H2	InChI=1S/C22H23N3O3S/c23-18-4-1-16(2-5-18)20-7-3-17-15-19(6-8-21(17)24-20)28-13-12-27-11-9-25-10-14-29-22(25)26/h1-8,15H,9-14,23H2	409.511	4.0482	117.3324	6	1	77.68	4	8	3	1	0.272727273	29	0	1	2	1	7	0	1	1	0.491170758	0.281300383	0.281300383	-0.491170758	22	7	29	0.75862069	0.24137931	0
Cai12e	NC(C=C1)=CC=C1C(C=C2)=NC(C2=C3)=CC=C3OCCOCCN4CCSC4=O	10.1021/acschemneuro.6b00051			>1000	>1000				[3H]PiB	AD	b	AD brain homogenate	Postmortem brain tissues from an autopsy-confirmed AD case and a healthy control were obtained from the Human Brain Collection Core (HBCC), NIH.		Radioligand Displacement	Human AD brain tissue was homogenized in assay medium (0.1% Tween-20 in PBS) at 1:500 dilution in volume, and aliquots of this suspension (100 μL) were added to each of four tubes (total 48 in a rack). A solution of tritiated radioligand ([3H]THK-523, [3H]T807 or [3H]PIB); 10 Bq/μL) in assay medium (100 μL) was added to each tube. Nonradioactive ligand (THK-523, T807 or PIB) or test compound was …	InChI=1S/C22H23N3O3S/c23-18-4-1-16(2-5-18)20-7-3-17-15-19(6-8-21(17)24-20)28-13-12-27-11-9-25-10-14-29-22(25)26/h1-8,15H,9-14,23H2	InChI=1S/C22H23N3O3S/c23-18-4-1-16(2-5-18)20-7-3-17-15-19(6-8-21(17)24-20)28-13-12-27-11-9-25-10-14-29-22(25)26/h1-8,15H,9-14,23H2	409.511	4.0482	117.3324	6	1	77.68	4	8	3	1	0.272727273	29	0	1	2	1	7	0	1	1	0.491170758	0.281300383	0.281300383	-0.491170758	22	7	29	0.75862069	0.24137931	0
Cai12f	NC(C=C1)=CC=C1C(C=C2)=NC(C2=C3)=CC=C3OCCOCCNCCO	10.1021/acschemneuro.6b00051			>1000	>1000				[3H]T807	AD	b	AD brain homogenate	Postmortem brain tissues from an autopsy-confirmed AD case and a healthy control were obtained from the Human Brain Collection Core (HBCC), NIH.		Radioligand Displacement	Human AD brain tissue was homogenized in assay medium (0.1% Tween-20 in PBS) at 1:500 dilution in volume, and aliquots of this suspension (100 μL) were added to each of four tubes (total 48 in a rack). A solution of tritiated radioligand ([3H]THK-523, [3H]T807 or [3H]PIB); 10 Bq/μL) in assay medium (100 μL) was added to each tube. Nonradioactive ligand (THK-523, T807 or PIB) or test compound was …	InChI=1S/C21H25N3O3/c22-18-4-1-16(2-5-18)20-7-3-17-15-19(6-8-21(17)24-20)27-14-13-26-12-10-23-9-11-25/h1-8,15,23,25H,9-14,22H2	InChI=1S/C21H25N3O3/c22-18-4-1-16(2-5-18)20-7-3-17-15-19(6-8-21(17)24-20)27-14-13-26-12-10-23-9-11-25/h1-8,15,23,25H,9-14,22H2	367.449	2.4613	107.8609	6	3	89.63	3	10	3	0	0.285714286	27	0	0	2	1	6	0	0	0	0.491170762	0.11967292	0.11967292	-0.491170762	21	6	27	0.777777778	0.222222222	0
Cai10e	NC(C=C1)=CC=C1C(C=C2)=NC(C2=C3)=CC=C3OCCOCCOCCOCCOCCF	10.1021/acschemneuro.6b00051			43	43		39	-7.366531544	[3H]PiB	AD	b	AD brain homogenate	Postmortem brain tissues from an autopsy-confirmed AD case and a healthy control were obtained from the Human Brain Collection Core (HBCC), NIH.		Radioligand Displacement	Human AD brain tissue was homogenized in assay medium (0.1% Tween-20 in PBS) at 1:500 dilution in volume, and aliquots of this suspension (100 μL) were added to each of four tubes (total 48 in a rack). A solution of tritiated radioligand ([3H]THK-523, [3H]T807 or [3H]PIB); 10 Bq/μL) in assay medium (100 μL) was added to each tube. Nonradioactive ligand (THK-523, T807 or PIB) or test compound was …	InChI=1S/C25H31FN2O5/c26-9-10-29-11-12-30-13-14-31-15-16-32-17-18-33-23-6-8-25-21(19-23)3-7-24(28-25)20-1-4-22(27)5-2-20/h1-8,19H,9-18,27H2	InChI=1S/C25H31FN2O5/c26-9-10-29-11-12-30-13-14-31-15-16-32-17-18-33-23-6-8-25-21(19-23)3-7-24(28-25)20-1-4-22(27)5-2-20/h1-8,19H,9-18,27H2	458.53	3.8987	126.3374	7	1	85.06	3	16	3	0	0.4	33	0	0	2	1	8	0	0	0	0.491170754	0.11967292	0.11967292	-0.491170754	25	7	33	0.757575758	0.212121212	0
Cai12f	NC(C=C1)=CC=C1C(C=C2)=NC(C2=C3)=CC=C3OCCOCCNCCO	10.1021/acschemneuro.6b00051			>1000	>1000				[3H]PiB	AD	b	AD brain homogenate	Postmortem brain tissues from an autopsy-confirmed AD case and a healthy control were obtained from the Human Brain Collection Core (HBCC), NIH.		Radioligand Displacement	Human AD brain tissue was homogenized in assay medium (0.1% Tween-20 in PBS) at 1:500 dilution in volume, and aliquots of this suspension (100 μL) were added to each of four tubes (total 48 in a rack). A solution of tritiated radioligand ([3H]THK-523, [3H]T807 or [3H]PIB); 10 Bq/μL) in assay medium (100 μL) was added to each tube. Nonradioactive ligand (THK-523, T807 or PIB) or test compound was …	InChI=1S/C21H25N3O3/c22-18-4-1-16(2-5-18)20-7-3-17-15-19(6-8-21(17)24-20)27-14-13-26-12-10-23-9-11-25/h1-8,15,23,25H,9-14,22H2	InChI=1S/C21H25N3O3/c22-18-4-1-16(2-5-18)20-7-3-17-15-19(6-8-21(17)24-20)27-14-13-26-12-10-23-9-11-25/h1-8,15,23,25H,9-14,22H2	367.449	2.4613	107.8609	6	3	89.63	3	10	3	0	0.285714286	27	0	0	2	1	6	0	0	0	0.491170762	0.11967292	0.11967292	-0.491170762	21	6	27	0.777777778	0.222222222	0
PiB	OC1=CC=C2C(SC(C3=CC=C(NC)C=C3)=N2)=C1	10.1021/acschemneuro6b00051			>1000	>1000				[3H]THK-523	AD	b	AD brain homogenate	Postmortem brain tissues from an autopsy-confirmed AD case and a healthy control were obtained from the Human Brain Collection Core (HBCC), NIH.		Radioligand Displacement	Human AD brain tissue was homogenized in assay medium (0.1% Tween-20 in PBS) at 1:500 dilution in volume, and aliquots of this suspension (100 μL) were added to each of four tubes (total 48 in a rack). A solution of tritiated radioligand ([3H]THK-523, [3H]T807 or [3H]PIB); 10 Bq/μL) in assay medium (100 μL) was added to each tube. Nonradioactive ligand (THK-523, T807 or PIB) or test compound was …	InChI=1S/C14H12N2OS/c1-15-10-4-2-9(3-5-10)14-16-12-7-6-11(17)8-13(12)18-14/h2-8,15,17H,1H3	InChI=1S/C14H12N2OS/c1-15-10-4-2-9(3-5-10)14-16-12-7-6-11(17)8-13(12)18-14/h2-8,15,17H,1H3	256.33	3.7106	76.2675	4	2	45.15	3	2	3	0	0.071428571	18	0	0	2	1	4	0	0	0	0.507910913	0.124107303	0.124107303	-0.507910913	14	4	18	0.777777778	0.222222222	0
Cai12a	NC(C=C1)=CC=C1C(C=C2)=NC(C2=C3)=CC=C3OCCOCCC4C(CCCC4=O)=O	10.1021/acschemneuro.6b00051			358	358		381	-6.446116973	[3H]THK-523	AD	b	AD brain homogenate	Postmortem brain tissues from an autopsy-confirmed AD case and a healthy control were obtained from the Human Brain Collection Core (HBCC), NIH.		Radioligand Displacement	Human AD brain tissue was homogenized in assay medium (0.1% Tween-20 in PBS) at 1:500 dilution in volume, and aliquots of this suspension (100 μL) were added to each of four tubes (total 48 in a rack). A solution of tritiated radioligand ([3H]THK-523, [3H]T807 or [3H]PIB); 10 Bq/μL) in assay medium (100 μL) was added to each tube. Nonradioactive ligand (THK-523, T807 or PIB) or test compound was …	InChI=1S/C25H26N2O4/c26-19-7-4-17(5-8-19)22-10-6-18-16-20(9-11-23(18)27-22)31-15-14-30-13-12-21-24(28)2-1-3-25(21)29/h4-11,16,21H,1-3,12-15,26H2	InChI=1S/C25H26N2O4/c26-19-7-4-17(5-8-19)22-10-6-18-16-20(9-11-23(18)27-22)31-15-14-30-13-12-21-24(28)2-1-3-25(21)29/h4-11,16,21H,1-3,12-15,26H2	418.493	4.2078	119.8774	6	1	91.51	4	8	3	1	0.32	31	1	0	2	1	6	1	0	1	0.491170773	0.142936308	0.142936308	-0.491170773	25	6	31	0.806451613	0.193548387	0
PiB	OC1=CC=C2C(SC(C3=CC=C(NC)C=C3)=N2)=C1	10.1021/acschemneuro6b00051			>1000	>1000				[3H]T807	AD	b	AD brain homogenate	Postmortem brain tissues from an autopsy-confirmed AD case and a healthy control were obtained from the Human Brain Collection Core (HBCC), NIH.		Radioligand Displacement	Human AD brain tissue was homogenized in assay medium (0.1% Tween-20 in PBS) at 1:500 dilution in volume, and aliquots of this suspension (100 μL) were added to each of four tubes (total 48 in a rack). A solution of tritiated radioligand ([3H]THK-523, [3H]T807 or [3H]PIB); 10 Bq/μL) in assay medium (100 μL) was added to each tube. Nonradioactive ligand (THK-523, T807 or PIB) or test compound was …	InChI=1S/C14H12N2OS/c1-15-10-4-2-9(3-5-10)14-16-12-7-6-11(17)8-13(12)18-14/h2-8,15,17H,1H3	InChI=1S/C14H12N2OS/c1-15-10-4-2-9(3-5-10)14-16-12-7-6-11(17)8-13(12)18-14/h2-8,15,17H,1H3	256.33	3.7106	76.2675	4	2	45.15	3	2	3	0	0.071428571	18	0	0	2	1	4	0	0	0	0.507910913	0.124107303	0.124107303	-0.507910913	14	4	18	0.777777778	0.222222222	0
Cai12a	NC(C=C1)=CC=C1C(C=C2)=NC(C2=C3)=CC=C3OCCOCCC4C(CCCC4=O)=O	10.1021/acschemneuro.6b00051			502	502		143	-6.299296283	[3H]PiB	AD	b	AD brain homogenate	Postmortem brain tissues from an autopsy-confirmed AD case and a healthy control were obtained from the Human Brain Collection Core (HBCC), NIH.		Radioligand Displacement	Human AD brain tissue was homogenized in assay medium (0.1% Tween-20 in PBS) at 1:500 dilution in volume, and aliquots of this suspension (100 μL) were added to each of four tubes (total 48 in a rack). A solution of tritiated radioligand ([3H]THK-523, [3H]T807 or [3H]PIB); 10 Bq/μL) in assay medium (100 μL) was added to each tube. Nonradioactive ligand (THK-523, T807 or PIB) or test compound was …	InChI=1S/C25H26N2O4/c26-19-7-4-17(5-8-19)22-10-6-18-16-20(9-11-23(18)27-22)31-15-14-30-13-12-21-24(28)2-1-3-25(21)29/h4-11,16,21H,1-3,12-15,26H2	InChI=1S/C25H26N2O4/c26-19-7-4-17(5-8-19)22-10-6-18-16-20(9-11-23(18)27-22)31-15-14-30-13-12-21-24(28)2-1-3-25(21)29/h4-11,16,21H,1-3,12-15,26H2	418.493	4.2078	119.8774	6	1	91.51	4	8	3	1	0.32	31	1	0	2	1	6	1	0	1	0.491170773	0.142936308	0.142936308	-0.491170773	25	6	31	0.806451613	0.193548387	0
Cai12c	NC(C=C1)=CC=C1C(C=C2)=NC(C2=C3)=CC=C3OCCOCCN4CCOC4=O	10.1021/acschemneuro.6b00051			35	35		19	-7.455931956	[3H]THK-523	AD	b	AD brain homogenate	Postmortem brain tissues from an autopsy-confirmed AD case and a healthy control were obtained from the Human Brain Collection Core (HBCC), NIH.		Radioligand Displacement	Human AD brain tissue was homogenized in assay medium (0.1% Tween-20 in PBS) at 1:500 dilution in volume, and aliquots of this suspension (100 μL) were added to each of four tubes (total 48 in a rack). A solution of tritiated radioligand ([3H]THK-523, [3H]T807 or [3H]PIB); 10 Bq/μL) in assay medium (100 μL) was added to each tube. Nonradioactive ligand (THK-523, T807 or PIB) or test compound was …	InChI=1S/C22H23N3O4/c23-18-4-1-16(2-5-18)20-7-3-17-15-19(6-8-21(17)24-20)28-14-13-27-11-9-25-10-12-29-22(25)26/h1-8,15H,9-14,23H2	InChI=1S/C22H23N3O4/c23-18-4-1-16(2-5-18)20-7-3-17-15-19(6-8-21(17)24-20)28-14-13-27-11-9-25-10-12-29-22(25)26/h1-8,15H,9-14,23H2	393.443	3.3316	110.8264	6	1	86.91	4	8	3	1	0.272727273	29	0	1	2	1	7	0	1	1	0.491170758	0.409518038	0.409518038	-0.491170758	22	7	29	0.75862069	0.24137931	0
Cai12d	NC(C=C1)=CC=C1C(C=C2)=NC(C2=C3)=CC=C3OCCOCCN4CCNC4=O	10.1021/acschemneuro.6b00051			78	78		7	-7.107905397	[3H]THK-523	AD	b	AD brain homogenate	Postmortem brain tissues from an autopsy-confirmed AD case and a healthy control were obtained from the Human Brain Collection Core (HBCC), NIH.		Radioligand Displacement	Human AD brain tissue was homogenized in assay medium (0.1% Tween-20 in PBS) at 1:500 dilution in volume, and aliquots of this suspension (100 μL) were added to each of four tubes (total 48 in a rack). A solution of tritiated radioligand ([3H]THK-523, [3H]T807 or [3H]PIB); 10 Bq/μL) in assay medium (100 μL) was added to each tube. Nonradioactive ligand (THK-523, T807 or PIB) or test compound was …	InChI=1S/C22H24N4O3/c23-18-4-1-16(2-5-18)20-7-3-17-15-19(6-8-21(17)25-20)29-14-13-28-12-11-26-10-9-24-22(26)27/h1-8,15H,9-14,23H2,(H,24,27)	InChI=1S/C22H24N4O3/c23-18-4-1-16(2-5-18)20-7-3-17-15-19(6-8-21(17)25-20)29-14-13-28-12-11-26-10-9-24-22(26)27/h1-8,15H,9-14,23H2,(H,24,27)	392.459	2.9046	112.8771	5	2	89.71	4	8	3	1	0.272727273	29	0	1	2	1	7	0	1	1	0.491170758	0.317099517	0.317099517	-0.491170758	22	7	29	0.75862069	0.24137931	0
Cai12e	NC(C=C1)=CC=C1C(C=C2)=NC(C2=C3)=CC=C3OCCOCCN4CCSC4=O	10.1021/acschemneuro.6b00051			21	21		6	-7.677780705	[3H]THK-523	AD	b	AD brain homogenate	Postmortem brain tissues from an autopsy-confirmed AD case and a healthy control were obtained from the Human Brain Collection Core (HBCC), NIH.		Radioligand Displacement	Human AD brain tissue was homogenized in assay medium (0.1% Tween-20 in PBS) at 1:500 dilution in volume, and aliquots of this suspension (100 μL) were added to each of four tubes (total 48 in a rack). A solution of tritiated radioligand ([3H]THK-523, [3H]T807 or [3H]PIB); 10 Bq/μL) in assay medium (100 μL) was added to each tube. Nonradioactive ligand (THK-523, T807 or PIB) or test compound was …	InChI=1S/C22H23N3O3S/c23-18-4-1-16(2-5-18)20-7-3-17-15-19(6-8-21(17)24-20)28-13-12-27-11-9-25-10-14-29-22(25)26/h1-8,15H,9-14,23H2	InChI=1S/C22H23N3O3S/c23-18-4-1-16(2-5-18)20-7-3-17-15-19(6-8-21(17)24-20)28-13-12-27-11-9-25-10-14-29-22(25)26/h1-8,15H,9-14,23H2	409.511	4.0482	117.3324	6	1	77.68	4	8	3	1	0.272727273	29	0	1	2	1	7	0	1	1	0.491170758	0.281300383	0.281300383	-0.491170758	22	7	29	0.75862069	0.24137931	0
Cai12f	NC(C=C1)=CC=C1C(C=C2)=NC(C2=C3)=CC=C3OCCOCCNCCO	10.1021/acschemneuro.6b00051			22	22		3	-7.657577319	[3H]THK-523	AD	b	AD brain homogenate	Postmortem brain tissues from an autopsy-confirmed AD case and a healthy control were obtained from the Human Brain Collection Core (HBCC), NIH.		Radioligand Displacement	Human AD brain tissue was homogenized in assay medium (0.1% Tween-20 in PBS) at 1:500 dilution in volume, and aliquots of this suspension (100 μL) were added to each of four tubes (total 48 in a rack). A solution of tritiated radioligand ([3H]THK-523, [3H]T807 or [3H]PIB); 10 Bq/μL) in assay medium (100 μL) was added to each tube. Nonradioactive ligand (THK-523, T807 or PIB) or test compound was …	InChI=1S/C21H25N3O3/c22-18-4-1-16(2-5-18)20-7-3-17-15-19(6-8-21(17)24-20)27-14-13-26-12-10-23-9-11-25/h1-8,15,23,25H,9-14,22H2	InChI=1S/C21H25N3O3/c22-18-4-1-16(2-5-18)20-7-3-17-15-19(6-8-21(17)24-20)27-14-13-26-12-10-23-9-11-25/h1-8,15,23,25H,9-14,22H2	367.449	2.4613	107.8609	6	3	89.63	3	10	3	0	0.285714286	27	0	0	2	1	6	0	0	0	0.491170762	0.11967292	0.11967292	-0.491170762	21	6	27	0.777777778	0.222222222	0
PiB	OC1=CC=C2C(SC(C3=CC=C(NC)C=C3)=N2)=C1	10.1021/acschemneuro6b00051			34	34		3	-7.468521083	[3H]PiB	AD	b	AD brain homogenate	Postmortem brain tissues from an autopsy-confirmed AD case and a healthy control were obtained from the Human Brain Collection Core (HBCC), NIH.		Radioligand Displacement	Human AD brain tissue was homogenized in assay medium (0.1% Tween-20 in PBS) at 1:500 dilution in volume, and aliquots of this suspension (100 μL) were added to each of four tubes (total 48 in a rack). A solution of tritiated radioligand ([3H]THK-523, [3H]T807 or [3H]PIB); 10 Bq/μL) in assay medium (100 μL) was added to each tube. Nonradioactive ligand (THK-523, T807 or PIB) or test compound was …	InChI=1S/C14H12N2OS/c1-15-10-4-2-9(3-5-10)14-16-12-7-6-11(17)8-13(12)18-14/h2-8,15,17H,1H3	InChI=1S/C14H12N2OS/c1-15-10-4-2-9(3-5-10)14-16-12-7-6-11(17)8-13(12)18-14/h2-8,15,17H,1H3	256.33	3.7106	76.2675	4	2	45.15	3	2	3	0	0.071428571	18	0	0	2	1	4	0	0	0	0.507910913	0.124107303	0.124107303	-0.507910913	14	4	18	0.777777778	0.222222222	0
Cai10f	NC(C=C1)=CC=C1C(C=C2)=NC(C2=C3)=CC=C3OCCOCCOCCOCCOCCOCCF	10.1021/acschemneuro.6b00051			>500	>500				[3H]PiB	AD	b	AD brain homogenate	Postmortem brain tissues from an autopsy-confirmed AD case and a healthy control were obtained from the Human Brain Collection Core (HBCC), NIH.		Radioligand Displacement	Human AD brain tissue was homogenized in assay medium (0.1% Tween-20 in PBS) at 1:500 dilution in volume, and aliquots of this suspension (100 μL) were added to each of four tubes (total 48 in a rack). A solution of tritiated radioligand ([3H]THK-523, [3H]T807 or [3H]PIB); 10 Bq/μL) in assay medium (100 μL) was added to each tube. Nonradioactive ligand (THK-523, T807 or PIB) or test compound was …	InChI=1S/C27H35FN2O6/c28-9-10-31-11-12-32-13-14-33-15-16-34-17-18-35-19-20-36-25-6-8-27-23(21-25)3-7-26(30-27)22-1-4-24(29)5-2-22/h1-8,21H,9-20,29H2	InChI=1S/C27H35FN2O6/c28-9-10-31-11-12-32-13-14-33-15-16-34-17-18-35-19-20-36-25-6-8-27-23(21-25)3-7-26(30-27)22-1-4-24(29)5-2-22/h1-8,21H,9-20,29H2	502.583	3.9153	137.1564	8	1	94.29	3	19	3	0	0.444444444	36	0	0	2	1	9	0	0	0	0.491170754	0.11967292	0.11967292	-0.491170754	27	8	36	0.75	0.222222222	0
2,6-ANS	O=S(C1=CC(C=CC(NC2=CC=CC=C2)=C3)=C3C=C1)([O-])=O	10.1529/biophysj.107.125211		8800		8800		500	-5.055517328		aS	f		Monomeric AS stock solutions were prepared in 25 mM Tris-HCl, pH 7.5, 100 mM NaCl, and centrifuged 30 min at 10^5 x g before use to remove aggregated material. Protein concentrations were determined by absorbance using an e275 of 5600 M^1 cm^1. Fibril suspensions were obtained by incubating 300 mM aS at 70 degC with constant shaking at 800 rpm in an Eppendorf Thermomixer comfort (Hamburg, Germany…		Fluorescence Saturation	In titration experiments, increasing volumes of 500 mM dye were added to a solution containing 2–8 mM aS or to buffer alone (blank) under continuous stirring. A 5-mm path cuvette was used. The spectra were recorded after equilibration for 5 min.	InChI=1S/C16H13NO3S/c18-21(19,20)16-9-7-12-10-15(8-6-13(12)11-16)17-14-4-2-1-3-5-14/h1-11,17H,(H,18,19,20)/p-1	InChI=1S/C16H13NO3S/c18-21(19,20)16-9-7-12-10-15(8-6-13(12)11-16)17-14-4-2-1-3-5-14/h1-11,17H,(H,18,19,20)/p-1	298.343	3.4875	81.6359	4	1	69.23	3	3	3	0	0	21	0	0	3	0	5	0	0	0	0.744035506	0.123946424	0.123946424	-0.744035506	16	5	21	0.761904762	0.238095238	0
2,6-TNS	CC(C=C1)=CC=C1NC2=CC(C=C3)=C(C=C2)C=C3S(=O)([O-])=O	10.1529/biophysj.107.125211		11700		11700		400	-4.931814138		aS	f		Monomeric AS stock solutions were prepared in 25 mM Tris-HCl, pH 7.5, 100 mM NaCl, and centrifuged 30 min at 10^5 x g before use to remove aggregated material. Protein concentrations were determined by absorbance using an e275 of 5600 M^1 cm^1. Fibril suspensions were obtained by incubating 300 mM aS at 70 degC with constant shaking at 800 rpm in an Eppendorf Thermomixer comfort (Hamburg, Germany…		Fluorescence Saturation	In titration experiments, increasing volumes of 500 mM dye were added to a solution containing 2–8 mM aS or to buffer alone (blank) under continuous stirring. A 5-mm path cuvette was used. The spectra were recorded after equilibration for 5 min.	InChI=1S/C17H15NO3S/c1-12-2-6-15(7-3-12)18-16-8-4-14-11-17(22(19,20)21)9-5-13(14)10-16/h2-11,18H,1H3,(H,19,20,21)/p-1	InChI=1S/C17H15NO3S/c1-12-2-6-15(7-3-12)18-16-8-4-14-11-17(22(19,20)21)9-5-13(14)10-16/h2-11,18H,1H3,(H,19,20,21)/p-1	312.37	3.79592	86.3729	4	1	69.23	3	3	3	0	0.058823529	22	0	0	3	0	5	0	0	0	0.744035506	0.123946424	0.123946424	-0.744035506	17	5	22	0.772727273	0.227272727	0
bis-ANS	O=S(C1=CC=CC2=C(C3=C(C=CC=C4S(=O)([O-])=O)C4=C(NC5=CC=CC=C5)C=C3)C=CC(NC6=CC=CC=C6)=C21)([O-])=O	10.1529/biophysj.107.125211		8600		8600		500	-5.065501549		aS	f		Monomeric AS stock solutions were prepared in 25 mM Tris-HCl, pH 7.5, 100 mM NaCl, and centrifuged 30 min at 10^5 x g before use to remove aggregated material. Protein concentrations were determined by absorbance using an e275 of 5600 M^1 cm^1. Fibril suspensions were obtained by incubating 300 mM aS at 70 degC with constant shaking at 800 rpm in an Eppendorf Thermomixer comfort (Hamburg, Germany…		Fluorescence Saturation	In titration experiments, increasing volumes of 500 mM dye were added to a solution containing 2–8 mM aS or to buffer alone (blank) under continuous stirring. A 5-mm path cuvette was used. The spectra were recorded after equilibration for 5 min.	InChI=1S/C32H24N2O6S2/c35-41(36,37)29-15-7-13-25-23(17-19-27(31(25)29)33-21-9-3-1-4-10-21)24-18-20-28(34-22-11-5-2-6-12-22)32-26(24)14-8-16-30(32)42(38,39)40/h1-20,33-34H,(H,35,36,37)(H,38,39,40)/p-2	InChI=1S/C32H24N2O6S2/c35-41(36,37)29-15-7-13-25-23(17-19-27(31(25)29)33-21-9-3-1-4-10-21)24-18-20-28(34-22-11-5-2-6-12-22)32-26(24)14-8-16-30(32)42(38,39)40/h1-20,33-34H,(H,35,36,37)(H,38,39,40)/p-2	594.67	6.9554	162.2658	8	2	138.46	6	7	6	0	0	42	0	0	6	0	10	0	0	0	0.744018498	0.124624713	0.124624713	-0.744018498	32	10	42	0.761904762	0.238095238	0
bis-TNS	CC(C=C1)=CC=C1NC2=C(C(S(=O)([O-])=O)=CC=C3)C3=C(C4=C(C=CC=C5S(=O)([O-])=O)C5=C(NC6=CC=C(C)C=C6)C=C4)C=C2	10.1529/biophysj.107.125211		11600		11600		700	-4.935542011		aS	f		Monomeric AS stock solutions were prepared in 25 mM Tris-HCl, pH 7.5, 100 mM NaCl, and centrifuged 30 min at 10^5 x g before use to remove aggregated material. Protein concentrations were determined by absorbance using an e275 of 5600 M^1 cm^1. Fibril suspensions were obtained by incubating 300 mM aS at 70 degC with constant shaking at 800 rpm in an Eppendorf Thermomixer comfort (Hamburg, Germany…		Fluorescence Saturation	In titration experiments, increasing volumes of 500 mM dye were added to a solution containing 2–8 mM aS or to buffer alone (blank) under continuous stirring. A 5-mm path cuvette was used. The spectra were recorded after equilibration for 5 min.	InChI=1S/C34H28N2O6S2/c1-21-9-13-23(14-10-21)35-29-19-17-25(27-5-3-7-31(33(27)29)43(37,38)39)26-18-20-30(36-24-15-11-22(2)12-16-24)34-28(26)6-4-8-32(34)44(40,41)42/h3-20,35-36H,1-2H3,(H,37,38,39)(H,40,41,42)/p-2	InChI=1S/C34H28N2O6S2/c1-21-9-13-23(14-10-21)35-29-19-17-25(27-5-3-7-31(33(27)29)43(37,38)39)26-18-20-30(36-24-15-11-22(2)12-16-24)34-28(26)6-4-8-32(34)44(40,41)42/h3-20,35-36H,1-2H3,(H,37,38,39)(H,40,41,42)/p-2	622.724	7.57224	171.7398	8	2	138.46	6	7	6	0	0.058823529	44	0	0	6	0	10	0	0	0	0.744018498	0.124624713	0.124624713	-0.744018498	34	10	44	0.772727273	0.227272727	0
ThT	OC1=CC=C([N+](C)=C(C2=CC=C(N(C)C)C=C2)S3)C3=C1	10.1529/biophysj.107.125211		14900		14900		0.4	-4.826813732		aS	f		Monomeric AS stock solutions were prepared in 25 mM Tris-HCl, pH 7.5, 100 mM NaCl, and centrifuged 30 min at 10^5 x g before use to remove aggregated material. Protein concentrations were determined by absorbance using an e275 of 5600 M^1 cm^1. Fibril suspensions were obtained by incubating 300 mM aS at 70 degC with constant shaking at 800 rpm in an Eppendorf Thermomixer comfort (Hamburg, Germany…		Fluorescence Saturation	In titration experiments, increasing volumes of 500 mM dye were added to a solution containing 2–8 mM aS or to buffer alone (blank) under continuous stirring. A 5-mm path cuvette was used. The spectra were recorded after equilibration for 5 min.	InChI=1S/C16H16N2OS/c1-17(2)12-6-4-11(5-7-12)16-18(3)14-9-8-13(19)10-15(14)20-16/h4-10H,1-3H3/p+1	InChI=1S/C16H16N2OS/c1-17(2)12-6-4-11(5-7-12)16-18(3)14-9-8-13(19)10-15(14)20-16/h4-10H,1-3H3/p+1	285.392	3.1644	84.4288	3	1	27.35	3	2	3	0	0.1875	20	0	0	2	1	4	0	0	0	0.507904719	0.269359896	0.269359896	-0.507904719	16	4	20	0.8	0.2	0
Chandra2006-3c	CSC(C=C1)=CC=C1C2=CC=C(C3=CC=C(SC)C=C3)S2	10.1016/j.bmcl.2005.11.055			>1000	>1000				[125I]IMPY	AD	b	AD brain homogenate	Not specified		Radioligand Displacement	Not specified	InChI=1S/C18H16S3/c1-19-15-7-3-13(4-8-15)17-11-12-18(21-17)14-5-9-16(20-2)10-6-14/h3-12H,1-2H3	InChI=1S/C18H16S3/c1-19-15-7-3-13(4-8-15)17-11-12-18(21-17)14-5-9-16(20-2)10-6-14/h3-12H,1-2H3	328.527	6.5259	98.753	3	0	0	3	4	3	0	0.111111111	21	0	0	2	1	3	0	0	0	0.135236254	0.034886768	0.034886768	-0.135236254	18	3	21	0.857142857	0.142857143	0
Chandra2006-3a	COC(C=CC=C1)=C1C2=CC=C(C3=CC=CC=C3OC)S2	10.1016/j.bmcl.2005.11.055			625	625		20	-6.204119983	[125I]IMPY	AD	b	AD brain homogenate	Not specified		Radioligand Displacement	Not specified	InChI=1S/C18H16O2S/c1-19-15-9-5-3-7-13(15)17-11-12-18(21-17)14-8-4-6-10-16(14)20-2/h3-12H,1-2H3	InChI=1S/C18H16O2S/c1-19-15-9-5-3-7-13(15)17-11-12-18(21-17)14-8-4-6-10-16(14)20-2/h3-12H,1-2H3	296.391	5.0993	88.295	3	0	18.46	3	4	3	0	0.111111111	21	0	0	2	1	3	0	0	0	0.496083146	0.127000272	0.127000272	-0.496083146	18	3	21	0.857142857	0.142857143	0
Chandra2006-3b	O=[N+](C(C=C1)=CC=C1C2=CC=C(C3=CC=C([N+]([O-])=O)C=C3)S2)[O-]	10.1016/j.bmcl.2005.11.055			185	185		30	-6.732828272	[125I]IMPY	AD	b	AD brain homogenate	Not specified		Radioligand Displacement	Not specified	InChI=1S/C16H10N2O4S/c19-17(20)13-5-1-11(2-6-13)15-9-10-16(23-15)12-3-7-14(8-4-12)18(21)22/h1-10H	InChI=1S/C16H10N2O4S/c19-17(20)13-5-1-11(2-6-13)15-9-10-16(23-15)12-3-7-14(8-4-12)18(21)22/h1-10H	326.333	4.8985	88.4998	5	0	86.28	3	4	3	0	0	23	0	0	2	1	7	0	0	0	0.268966542	0.268966542	0.258309634	-0.258309634	16	7	23	0.695652174	0.304347826	0
Chandra2006-3d	COC(C=C1)=CC=C1C2=CC=C(C3=CC=C(OC)C=C3)S2	10.1016/j.bmcl.2005.11.055			108	108		22	-6.966576245	[125I]IMPY	AD	b	AD brain homogenate	Not specified		Radioligand Displacement	Not specified	InChI=1S/C18H16O2S/c1-19-15-7-3-13(4-8-15)17-11-12-18(21-17)14-5-9-16(20-2)10-6-14/h3-12H,1-2H3	InChI=1S/C18H16O2S/c1-19-15-7-3-13(4-8-15)17-11-12-18(21-17)14-5-9-16(20-2)10-6-14/h3-12H,1-2H3	296.391	5.0993	88.295	3	0	18.46	3	4	3	0	0.111111111	21	0	0	2	1	3	0	0	0	0.496767811	0.118402263	0.118402263	-0.496767811	18	3	21	0.857142857	0.142857143	0
Chandra2006-3e	OC(C=C1)=CC=C1C2=CC=C(C3=CC=C(O)C=C3)S2	10.1016/j.bmcl.2005.11.055			4	4		0.6	-8.397940009	[125I]IMPY	AD	b	AD brain homogenate	Not specified		Radioligand Displacement	Not specified	InChI=1S/C16H12O2S/c17-13-5-1-11(2-6-13)15-9-10-16(19-15)12-3-7-14(18)8-4-12/h1-10,17-18H	InChI=1S/C16H12O2S/c17-13-5-1-11(2-6-13)15-9-10-16(19-15)12-3-7-14(18)8-4-12/h1-10,17-18H	268.337	4.4933	78.5206	3	2	40.46	3	2	3	0	0	19	0	0	2	1	3	0	0	0	0.507966237	0.115119367	0.115119367	-0.507966237	16	3	19	0.842105263	0.157894737	0
Chandra2006-3f	COC(C=C1)=CC=C1C2=CC=C(C3=CC=C(O)C=C3)S2	10.1016/j.bmcl.2005.11.055			6.1	6.1		0.5	-8.214670165	[125I]IMPY	AD	b	AD brain homogenate	Not specified		Radioligand Displacement	Not specified	InChI=1S/C17H14O2S/c1-19-15-8-4-13(5-9-15)17-11-10-16(20-17)12-2-6-14(18)7-3-12/h2-11,18H,1H3	InChI=1S/C17H14O2S/c1-19-15-8-4-13(5-9-15)17-11-10-16(20-17)12-2-6-14(18)7-3-12/h2-11,18H,1H3	282.364	4.7963	83.4078	3	1	29.46	3	3	3	0	0.058823529	20	0	0	2	1	3	0	0	0	0.507966237	0.118402263	0.118402263	-0.507966237	17	3	20	0.85	0.15	0
Chandra2006-3g	NC(C=C1)=CC=C1C2=CC=C(C3=CC=C(N)C=C3)S2	10.1016/j.bmcl.2005.11.055			6.1	6.1		0.8	-8.214670165	[125I]IMPY	AD	b	AD brain homogenate	Not specified		Radioligand Displacement	Not specified	InChI=1S/C16H14N2S/c17-13-5-1-11(2-6-13)15-9-10-16(19-15)12-3-7-14(18)8-4-12/h1-10H,17-18H2	InChI=1S/C16H14N2S/c17-13-5-1-11(2-6-13)15-9-10-16(19-15)12-3-7-14(18)8-4-12/h1-10H,17-18H2	266.369	4.2465	84.0158	3	2	52.04	3	2	3	0	0	19	0	0	2	1	3	0	0	0	0.398728251	0.034887991	0.034887991	-0.398728251	16	3	19	0.842105263	0.157894737	0
Chandra2006-3h	COC(C=C1)=CC=C1C2=CC=C(C3=CC=C([N+]([O-])=O)C=C3)S2	10.1016/j.bmcl.2005.11.055			18.5	18.5		5	-7.732828272	[125I]IMPY	AD	b	AD brain homogenate	Not specified		Radioligand Displacement	Not specified	InChI=1S/C17H13NO3S/c1-21-15-8-4-13(5-9-15)17-11-10-16(22-17)12-2-6-14(7-3-12)18(19)20/h2-11H,1H3	InChI=1S/C17H13NO3S/c1-21-15-8-4-13(5-9-15)17-11-10-16(22-17)12-2-6-14(7-3-12)18(19)20/h2-11H,1H3	311.362	4.9989	88.3974	4	0	52.37	3	4	3	0	0.058823529	22	0	0	2	1	5	0	0	0	0.496767811	0.268966542	0.268966542	-0.496767811	17	5	22	0.772727273	0.227272727	0
Chandra2006-3i	COC(C=C1)=CC=C1C2=CC=C(C3=CC=C(N)C=C3)S2	10.1016/j.bmcl.2005.11.055			5.6	5.6		0.4	-8.251811973	[125I]IMPY	AD	b	AD brain homogenate	Not specified		Radioligand Displacement	Not specified	InChI=1S/C17H15NOS/c1-19-15-8-4-13(5-9-15)17-11-10-16(20-17)12-2-6-14(18)7-3-12/h2-11H,18H2,1H3	InChI=1S/C17H15NOS/c1-19-15-8-4-13(5-9-15)17-11-10-16(20-17)12-2-6-14(18)7-3-12/h2-11H,18H2,1H3	281.38	4.6729	86.1554	3	1	35.25	3	3	3	0	0.058823529	20	0	0	2	1	3	0	0	0	0.496767811	0.118402263	0.118402263	-0.496767811	17	3	20	0.85	0.15	0
Chandra2006-3j	OC(C=C1)=CC=C1C2=CC=C(C3=CC=C(N)C=C3)S2	10.1016/j.bmcl.2005.11.055			9.6	9.6		0.8	-8.017728767	[125I]IMPY	AD	b	AD brain homogenate	Not specified		Radioligand Displacement	Not specified	InChI=1S/C16H13NOS/c17-13-5-1-11(2-6-13)15-9-10-16(19-15)12-3-7-14(18)8-4-12/h1-10,18H,17H2	InChI=1S/C16H13NOS/c17-13-5-1-11(2-6-13)15-9-10-16(19-15)12-3-7-14(18)8-4-12/h1-10,18H,17H2	267.353	4.3699	81.2682	3	2	46.25	3	2	3	0	0	19	0	0	2	1	3	0	0	0	0.507966237	0.115119367	0.115119367	-0.507966237	16	3	19	0.842105263	0.157894737	0
Chandra2006-3k	CN(C)C(C=C1)=CC=C1C2=CC=C(C3=CC=C(OC)C=C3)S2	10.1016/j.bmcl.2005.11.055			500	500		20	-6.301029996	[125I]IMPY	AD	b	AD brain homogenate	Not specified		Radioligand Displacement	Not specified	InChI=1S/C19H19NOS/c1-20(2)16-8-4-14(5-9-16)18-12-13-19(22-18)15-6-10-17(21-3)11-7-15/h4-13H,1-3H3	InChI=1S/C19H19NOS/c1-20(2)16-8-4-14(5-9-16)18-12-13-19(22-18)15-6-10-17(21-3)11-7-15/h4-13H,1-3H3	309.434	5.1567	96.07	3	0	12.47	3	4	3	0	0.157894737	22	0	0	2	1	3	0	0	0	0.496767811	0.118402263	0.118402263	-0.496767811	19	3	22	0.863636364	0.136363636	0
Chandra2006-3m	CN(C)C(C=C1)=CC=C1C2=CC=C(C3=CC=C(O)C=C3)S2	10.1016/j.bmcl.2005.11.055			7.5	7.5		0.4	-8.124938737	[125I]IMPY	AD	b	AD brain homogenate	Not specified		Radioligand Displacement	Not specified	InChI=1S/C18H17NOS/c1-19(2)15-7-3-13(4-8-15)17-11-12-18(21-17)14-5-9-16(20)10-6-14/h3-12,20H,1-2H3	InChI=1S/C18H17NOS/c1-19(2)15-7-3-13(4-8-15)17-11-12-18(21-17)14-5-9-16(20)10-6-14/h3-12,20H,1-2H3	295.407	4.8537	91.1828	3	1	23.47	3	3	3	0	0.111111111	21	0	0	2	1	3	0	0	0	0.507966237	0.115119367	0.115119367	-0.507966237	18	3	21	0.857142857	0.142857143	0
Chandra2006-3n	COC(C=C1)=CC=C1C2=CC=C(C3=CC=C(NCCF)C=C3)S2	10.1016/j.bmcl.2005.11.055			21.5	21.5		0.5	-7.66756154	[125I]IMPY	AD	b	AD brain homogenate	Not specified		Radioligand Displacement	Not specified	InChI=1S/C19H18FNOS/c1-22-17-8-4-15(5-9-17)19-11-10-18(23-19)14-2-6-16(7-3-14)21-13-12-20/h2-11,21H,12-13H2,1H3	InChI=1S/C19H18FNOS/c1-22-17-8-4-15(5-9-17)19-11-10-18(23-19)14-2-6-16(7-3-14)21-13-12-20/h2-11,21H,12-13H2,1H3	327.424	5.4721	96.2077	3	1	21.26	3	6	3	0	0.157894737	23	0	0	2	1	4	0	0	0	0.496767811	0.118402263	0.118402263	-0.496767811	19	3	23	0.826086957	0.130434783	0
Chandra2006-3p	OC(C=C1)=CC=C1C2=CC=C(C3=CC=C(NCCF)C=C3)S2	10.1016/j.bmcl.2005.11.055			3.9	3.9		0.5	-8.408935393	[125I]IMPY	AD	b	AD brain homogenate	Not specified		Radioligand Displacement	Not specified	InChI=1S/C18H16FNOS/c19-11-12-20-15-5-1-13(2-6-15)17-9-10-18(22-17)14-3-7-16(21)8-4-14/h1-10,20-21H,11-12H2	InChI=1S/C18H16FNOS/c19-11-12-20-15-5-1-13(2-6-15)17-9-10-18(22-17)14-3-7-16(21)8-4-14/h1-10,20-21H,11-12H2	313.397	5.1691	91.3205	3	2	32.26	3	5	3	0	0.111111111	22	0	0	2	1	4	0	0	0	0.507966237	0.115119367	0.115119367	-0.507966237	18	3	22	0.818181818	0.136363636	0
Chandra2006-3q	OC(C=C1)=CC=C1C2=CC=C(C3=CC=C(NC)C=C3)S2	10.1016/j.bmcl.2005.11.055			31.2	31.2		3	-7.505845406	[125I]IMPY	AD	b	AD brain homogenate	Not specified		Radioligand Displacement	Not specified	InChI=1S/C17H15NOS/c1-18-14-6-2-12(3-7-14)16-10-11-17(20-16)13-4-8-15(19)9-5-13/h2-11,18-19H,1H3	InChI=1S/C17H15NOS/c1-18-14-6-2-12(3-7-14)16-10-11-17(20-16)13-4-8-15(19)9-5-13/h2-11,18-19H,1H3	281.38	4.8294	86.4025	3	2	32.26	3	3	3	0	0.058823529	20	0	0	2	1	3	0	0	0	0.507966237	0.115119367	0.115119367	-0.507966237	17	3	20	0.85	0.15	0
Chandra2007-09	C1(C#CC2=CC=CC=C2)=CC=CC=C1	10.1021/jm070090j			175	175		35	-6.756961951	[125I]IMPY	AD	b	AD brain homogenate	AD postmortem brain tissues were obtained from University of Washington Alzheimer's Disease Research Center, and neuropathological diagnosis was confirmed by current criteria (NIA-Reagan Institute Consensus Group, 1997). Homogenates were then prepared from dissected gray matters from four pooled AD patients in phosphate buffered saline (PBS, pH 7.4) at the concentration of approximately 100 mg we…		Radioligand Displacement	Competition binding assays were carried out in 12 × 75 mm borosilicate glass tubes. The reaction mixture contained 50 μL of pooled AD brain homogenates (20−50 μg), 50 μL of [125I]IMPY, 4, (0.04−0.06 nM diluted in PBS), and 50 μL of inhibitors (10-5−10-10 M diluted serially in PBS containing 0.1% bovine serum albumin) in a final volume of 1 mL. Nonspecific binding was defined in the presence of 60…	InChI=1S/C14H10/c1-3-7-13(8-4-1)11-12-14-9-5-2-6-10-14/h1-10H	InChI=1S/C14H10/c1-3-7-13(8-4-1)11-12-14-9-5-2-6-10-14/h1-10H	178.234	3.0864	58.864	0	0	0	2	0	2	0	0	14	0	0	2	0	0	0	0	0	0.062181502	0.024852728	0.024852728	-0.062181502	14	0	14	1	0	2
Chandra2007-09a	NC1=CC=C(C#CC2=CC=C(O)C=C2)C=C1	10.1021/jm070090j			106	106		6	-6.974694135	[125I]IMPY	AD	b	AD brain homogenate	AD postmortem brain tissues were obtained from University of Washington Alzheimer's Disease Research Center, and neuropathological diagnosis was confirmed by current criteria (NIA-Reagan Institute Consensus Group, 1997). Homogenates were then prepared from dissected gray matters from four pooled AD patients in phosphate buffered saline (PBS, pH 7.4) at the concentration of approximately 100 mg we…		Radioligand Displacement	Competition binding assays were carried out in 12 × 75 mm borosilicate glass tubes. The reaction mixture contained 50 μL of pooled AD brain homogenates (20−50 μg), 50 μL of [125I]IMPY, 4, (0.04−0.06 nM diluted in PBS), and 50 μL of inhibitors (10-5−10-10 M diluted serially in PBS containing 0.1% bovine serum albumin) in a final volume of 1 mL. Nonspecific binding was defined in the presence of 60…	InChI=1S/C14H11NO/c15-13-7-3-11(4-8-13)1-2-12-5-9-14(16)10-6-12/h3-10,16H,15H2	InChI=1S/C14H11NO/c15-13-7-3-11(4-8-13)1-2-12-5-9-14(16)10-6-12/h3-10,16H,15H2	209.248	2.3742	64.9412	2	2	46.25	2	0	2	0	0	16	0	0	2	0	2	0	0	0	0.50796548	0.115162723	0.115162723	-0.50796548	14	2	16	0.875	0.125	2
Chandra2007-09b	OC(C=C1)=CC=C1C#CC(C=C2)=CC=C2NC	10.1021/jm070090j			1.5	1.5		0.1	-8.823908741	[125I]IMPY	AD	b	AD brain homogenate	AD postmortem brain tissues were obtained from University of Washington Alzheimer's Disease Research Center, and neuropathological diagnosis was confirmed by current criteria (NIA-Reagan Institute Consensus Group, 1997). Homogenates were then prepared from dissected gray matters from four pooled AD patients in phosphate buffered saline (PBS, pH 7.4) at the concentration of approximately 100 mg we…		Radioligand Displacement	Competition binding assays were carried out in 12 × 75 mm borosilicate glass tubes. The reaction mixture contained 50 μL of pooled AD brain homogenates (20−50 μg), 50 μL of [125I]IMPY, 4, (0.04−0.06 nM diluted in PBS), and 50 μL of inhibitors (10-5−10-10 M diluted serially in PBS containing 0.1% bovine serum albumin) in a final volume of 1 mL. Nonspecific binding was defined in the presence of 60…	InChI=1S/C15H13NO/c1-16-14-8-4-12(5-9-14)2-3-13-6-10-15(17)11-7-13/h4-11,16-17H,1H3	InChI=1S/C15H13NO/c1-16-14-8-4-12(5-9-14)2-3-13-6-10-15(17)11-7-13/h4-11,16-17H,1H3	223.275	2.8337	70.0755	2	2	32.26	2	1	2	0	0.066666667	17	0	0	2	0	2	0	0	0	0.50796548	0.115162723	0.115162723	-0.50796548	15	2	17	0.882352941	0.117647059	2
Chandra2007-09c	OC(C=C1)=CC=C1C#CC(C=C2)=CC=C2OC	10.1021/jm070090j			2.9	2.9		0.3	-8.537602002	[125I]IMPY	AD	b	AD brain homogenate	AD postmortem brain tissues were obtained from University of Washington Alzheimer's Disease Research Center, and neuropathological diagnosis was confirmed by current criteria (NIA-Reagan Institute Consensus Group, 1997). Homogenates were then prepared from dissected gray matters from four pooled AD patients in phosphate buffered saline (PBS, pH 7.4) at the concentration of approximately 100 mg we…		Radioligand Displacement	Competition binding assays were carried out in 12 × 75 mm borosilicate glass tubes. The reaction mixture contained 50 μL of pooled AD brain homogenates (20−50 μg), 50 μL of [125I]IMPY, 4, (0.04−0.06 nM diluted in PBS), and 50 μL of inhibitors (10-5−10-10 M diluted serially in PBS containing 0.1% bovine serum albumin) in a final volume of 1 mL. Nonspecific binding was defined in the presence of 60…	InChI=1S/C15H12O2/c1-17-15-10-6-13(7-11-15)3-2-12-4-8-14(16)9-5-12/h4-11,16H,1H3	InChI=1S/C15H12O2/c1-17-15-10-6-13(7-11-15)3-2-12-4-8-14(16)9-5-12/h4-11,16H,1H3	224.259	2.8006	67.0808	2	1	29.46	2	1	2	0	0.066666667	17	0	0	2	0	2	0	0	0	0.50796548	0.118445619	0.118445619	-0.50796548	15	2	17	0.882352941	0.117647059	2
Chandra2007-09d	NC1=CC=C(C#CC2=CC=C(N)C=C2)C=C1	10.1021/jm070090j			76	76		15	-7.119186408	[125I]IMPY	AD	b	AD brain homogenate	AD postmortem brain tissues were obtained from University of Washington Alzheimer's Disease Research Center, and neuropathological diagnosis was confirmed by current criteria (NIA-Reagan Institute Consensus Group, 1997). Homogenates were then prepared from dissected gray matters from four pooled AD patients in phosphate buffered saline (PBS, pH 7.4) at the concentration of approximately 100 mg we…		Radioligand Displacement	Competition binding assays were carried out in 12 × 75 mm borosilicate glass tubes. The reaction mixture contained 50 μL of pooled AD brain homogenates (20−50 μg), 50 μL of [125I]IMPY, 4, (0.04−0.06 nM diluted in PBS), and 50 μL of inhibitors (10-5−10-10 M diluted serially in PBS containing 0.1% bovine serum albumin) in a final volume of 1 mL. Nonspecific binding was defined in the presence of 60…	InChI=1S/C14H12N2/c15-13-7-3-11(4-8-13)1-2-12-5-9-14(16)10-6-12/h3-10H,15-16H2	InChI=1S/C14H12N2/c15-13-7-3-11(4-8-13)1-2-12-5-9-14(16)10-6-12/h3-10H,15-16H2	208.264	2.2508	67.6888	2	2	52.04	2	0	2	0	0	16	0	0	2	0	2	0	0	0	0.398727672	0.031435423	0.031435423	-0.398727672	14	2	16	0.875	0.125	2
Chandra2007-09e	NC1=CC=C(C#CC2=CC=C(OC)C=C2)C=C1	10.1021/jm070090j			2.9	2.9		0.4	-8.537602002	[125I]IMPY	AD	b	AD brain homogenate	AD postmortem brain tissues were obtained from University of Washington Alzheimer's Disease Research Center, and neuropathological diagnosis was confirmed by current criteria (NIA-Reagan Institute Consensus Group, 1997). Homogenates were then prepared from dissected gray matters from four pooled AD patients in phosphate buffered saline (PBS, pH 7.4) at the concentration of approximately 100 mg we…		Radioligand Displacement	Competition binding assays were carried out in 12 × 75 mm borosilicate glass tubes. The reaction mixture contained 50 μL of pooled AD brain homogenates (20−50 μg), 50 μL of [125I]IMPY, 4, (0.04−0.06 nM diluted in PBS), and 50 μL of inhibitors (10-5−10-10 M diluted serially in PBS containing 0.1% bovine serum albumin) in a final volume of 1 mL. Nonspecific binding was defined in the presence of 60…	InChI=1S/C15H13NO/c1-17-15-10-6-13(7-11-15)3-2-12-4-8-14(16)9-5-12/h4-11H,16H2,1H3	InChI=1S/C15H13NO/c1-17-15-10-6-13(7-11-15)3-2-12-4-8-14(16)9-5-12/h4-11H,16H2,1H3	223.275	2.6772	69.8284	2	1	35.25	2	1	2	0	0.066666667	17	0	0	2	0	2	0	0	0	0.496767053	0.118445619	0.118445619	-0.496767053	15	2	17	0.882352941	0.117647059	2
Chandra2007-11a	NC1=CC=C(C#CC2=CC=C(OCCOCCF)C=C2)C=C1	10.1021/jm070090j			12	12		2.9	-7.920818754	[125I]IMPY	AD	b	AD brain homogenate	AD postmortem brain tissues were obtained from University of Washington Alzheimer's Disease Research Center, and neuropathological diagnosis was confirmed by current criteria (NIA-Reagan Institute Consensus Group, 1997). Homogenates were then prepared from dissected gray matters from four pooled AD patients in phosphate buffered saline (PBS, pH 7.4) at the concentration of approximately 100 mg we…		Radioligand Displacement	Competition binding assays were carried out in 12 × 75 mm borosilicate glass tubes. The reaction mixture contained 50 μL of pooled AD brain homogenates (20−50 μg), 50 μL of [125I]IMPY, 4, (0.04−0.06 nM diluted in PBS), and 50 μL of inhibitors (10-5−10-10 M diluted serially in PBS containing 0.1% bovine serum albumin) in a final volume of 1 mL. Nonspecific binding was defined in the presence of 60…	InChI=1S/C18H18FNO2/c19-11-12-21-13-14-22-18-9-5-16(6-10-18)2-1-15-3-7-17(20)8-4-15/h3-10H,11-14,20H2	InChI=1S/C18H18FNO2/c19-11-12-21-13-14-22-18-9-5-16(6-10-18)2-1-15-3-7-17(20)8-4-15/h3-10H,11-14,20H2	299.345	3.0335	85.5654	3	1	44.48	2	6	2	0	0.222222222	22	0	0	2	0	4	0	0	0	0.491194676	0.119005987	0.119005987	-0.491194676	18	3	22	0.818181818	0.136363636	2
Chandra2007-12a	CNC1=CC=C(C#CC2=CC=C(OCCOCCF)C=C2)C=C1	10.1021/jm070090j			1.2	1.2		0.2	-8.920818754	[125I]IMPY	AD	b	AD brain homogenate	AD postmortem brain tissues were obtained from University of Washington Alzheimer's Disease Research Center, and neuropathological diagnosis was confirmed by current criteria (NIA-Reagan Institute Consensus Group, 1997). Homogenates were then prepared from dissected gray matters from four pooled AD patients in phosphate buffered saline (PBS, pH 7.4) at the concentration of approximately 100 mg we…		Radioligand Displacement	Competition binding assays were carried out in 12 × 75 mm borosilicate glass tubes. The reaction mixture contained 50 μL of pooled AD brain homogenates (20−50 μg), 50 μL of [125I]IMPY, 4, (0.04−0.06 nM diluted in PBS), and 50 μL of inhibitors (10-5−10-10 M diluted serially in PBS containing 0.1% bovine serum albumin) in a final volume of 1 mL. Nonspecific binding was defined in the presence of 60…	InChI=1S/C19H20FNO2/c1-21-18-8-4-16(5-9-18)2-3-17-6-10-19(11-7-17)23-15-14-22-13-12-20/h4-11,21H,12-15H2,1H3	InChI=1S/C19H20FNO2/c1-21-18-8-4-16(5-9-18)2-3-17-6-10-19(11-7-17)23-15-14-22-13-12-20/h4-11,21H,12-15H2,1H3	313.372	3.493	90.6997	3	1	30.49	2	7	2	0	0.263157895	23	0	0	2	0	4	0	0	0	0.491194676	0.119005987	0.119005987	-0.491194676	19	3	23	0.826086957	0.130434783	2
Chandra2007-14a	CN(C)C1=CC=C(C#CC2=CC=C(OCCOCCF)C=C2)C=C1	10.1021/jm070090j			5	5		1	-8.301029996	[125I]IMPY	AD	b	AD brain homogenate	AD postmortem brain tissues were obtained from University of Washington Alzheimer's Disease Research Center, and neuropathological diagnosis was confirmed by current criteria (NIA-Reagan Institute Consensus Group, 1997). Homogenates were then prepared from dissected gray matters from four pooled AD patients in phosphate buffered saline (PBS, pH 7.4) at the concentration of approximately 100 mg we…		Radioligand Displacement	Competition binding assays were carried out in 12 × 75 mm borosilicate glass tubes. The reaction mixture contained 50 μL of pooled AD brain homogenates (20−50 μg), 50 μL of [125I]IMPY, 4, (0.04−0.06 nM diluted in PBS), and 50 μL of inhibitors (10-5−10-10 M diluted serially in PBS containing 0.1% bovine serum albumin) in a final volume of 1 mL. Nonspecific binding was defined in the presence of 60…	InChI=1S/C20H22FNO2/c1-22(2)19-9-5-17(6-10-19)3-4-18-7-11-20(12-8-18)24-16-15-23-14-13-21/h5-12H,13-16H2,1-2H3	InChI=1S/C20H22FNO2/c1-22(2)19-9-5-17(6-10-19)3-4-18-7-11-20(12-8-18)24-16-15-23-14-13-21/h5-12H,13-16H2,1-2H3	327.399	3.5173	95.48	3	0	21.7	2	7	2	0	0.3	24	0	0	2	0	4	0	0	0	0.491194676	0.119005987	0.119005987	-0.491194676	20	3	24	0.833333333	0.125	2
Chandra2007-20a	OCCOCCOC(C=C1)=CC=C1C#CC(C=C2)=CC=C2NC	10.1021/jm070090j			3.1	3.1		0.6	-8.508638306	[125I]IMPY	AD	b	AD brain homogenate	AD postmortem brain tissues were obtained from University of Washington Alzheimer's Disease Research Center, and neuropathological diagnosis was confirmed by current criteria (NIA-Reagan Institute Consensus Group, 1997). Homogenates were then prepared from dissected gray matters from four pooled AD patients in phosphate buffered saline (PBS, pH 7.4) at the concentration of approximately 100 mg we…		Radioligand Displacement	Competition binding assays were carried out in 12 × 75 mm borosilicate glass tubes. The reaction mixture contained 50 μL of pooled AD brain homogenates (20−50 μg), 50 μL of [125I]IMPY, 4, (0.04−0.06 nM diluted in PBS), and 50 μL of inhibitors (10-5−10-10 M diluted serially in PBS containing 0.1% bovine serum albumin) in a final volume of 1 mL. Nonspecific binding was defined in the presence of 60…	InChI=1S/C19H21NO3/c1-20-18-8-4-16(5-9-18)2-3-17-6-10-19(11-7-17)23-15-14-22-13-12-21/h4-11,20-21H,12-15H2,1H3	InChI=1S/C19H21NO3/c1-20-18-8-4-16(5-9-18)2-3-17-6-10-19(11-7-17)23-15-14-22-13-12-21/h4-11,20-21H,12-15H2,1H3	311.381	2.5158	91.8105	4	2	50.72	2	7	2	0	0.263157895	23	0	0	2	0	4	0	0	0	0.491194678	0.119005987	0.119005987	-0.491194678	19	4	23	0.826086957	0.173913043	2
Chandra2007-23a	OCCOCCOC(C=C1)=CC=C1C#CC(C=C2)=CC=C2N(C)C	10.1021/jm070090j			3.8	3.8		0.8	-8.420216403	[125I]IMPY	AD	b	AD brain homogenate	AD postmortem brain tissues were obtained from University of Washington Alzheimer's Disease Research Center, and neuropathological diagnosis was confirmed by current criteria (NIA-Reagan Institute Consensus Group, 1997). Homogenates were then prepared from dissected gray matters from four pooled AD patients in phosphate buffered saline (PBS, pH 7.4) at the concentration of approximately 100 mg we…		Radioligand Displacement	Competition binding assays were carried out in 12 × 75 mm borosilicate glass tubes. The reaction mixture contained 50 μL of pooled AD brain homogenates (20−50 μg), 50 μL of [125I]IMPY, 4, (0.04−0.06 nM diluted in PBS), and 50 μL of inhibitors (10-5−10-10 M diluted serially in PBS containing 0.1% bovine serum albumin) in a final volume of 1 mL. Nonspecific binding was defined in the presence of 60…	InChI=1S/C20H23NO3/c1-21(2)19-9-5-17(6-10-19)3-4-18-7-11-20(12-8-18)24-16-15-23-14-13-22/h5-12,22H,13-16H2,1-2H3	InChI=1S/C20H23NO3/c1-21(2)19-9-5-17(6-10-19)3-4-18-7-11-20(12-8-18)24-16-15-23-14-13-22/h5-12,22H,13-16H2,1-2H3	325.408	2.5401	96.5908	4	1	41.93	2	7	2	0	0.3	24	0	0	2	0	4	0	0	0	0.491194678	0.119005987	0.119005987	-0.491194678	20	4	24	0.833333333	0.166666667	2
Chandra2007-11b	NC1=CC=C(C#CC2=CC=C(OCCOCCOCCF)C=C2)C=C1	10.1021/jm070090j			21.5	21.5		6.5	-7.66756154	[125I]IMPY	AD	b	AD brain homogenate	AD postmortem brain tissues were obtained from University of Washington Alzheimer's Disease Research Center, and neuropathological diagnosis was confirmed by current criteria (NIA-Reagan Institute Consensus Group, 1997). Homogenates were then prepared from dissected gray matters from four pooled AD patients in phosphate buffered saline (PBS, pH 7.4) at the concentration of approximately 100 mg we…		Radioligand Displacement	Competition binding assays were carried out in 12 × 75 mm borosilicate glass tubes. The reaction mixture contained 50 μL of pooled AD brain homogenates (20−50 μg), 50 μL of [125I]IMPY, 4, (0.04−0.06 nM diluted in PBS), and 50 μL of inhibitors (10-5−10-10 M diluted serially in PBS containing 0.1% bovine serum albumin) in a final volume of 1 mL. Nonspecific binding was defined in the presence of 60…	InChI=1S/C20H22FNO3/c21-11-12-23-13-14-24-15-16-25-20-9-5-18(6-10-20)2-1-17-3-7-19(22)8-4-17/h3-10H,11-16,22H2	InChI=1S/C20H22FNO3/c21-11-12-23-13-14-24-15-16-25-20-9-5-18(6-10-20)2-1-17-3-7-19(22)8-4-17/h3-10H,11-16,22H2	343.398	3.0501	96.3844	4	1	53.71	2	9	2	0	0.3	25	0	0	2	0	5	0	0	0	0.491194678	0.119005987	0.119005987	-0.491194678	20	4	25	0.8	0.16	2
Chandra2007-12b	CNC1=CC=C(C#CC2=CC=C(OCCOCCOCCF)C=C2)C=C1	10.1021/jm070090j			1.9	1.9		0.3	-8.721246399	[125I]IMPY	AD	b	AD brain homogenate	AD postmortem brain tissues were obtained from University of Washington Alzheimer's Disease Research Center, and neuropathological diagnosis was confirmed by current criteria (NIA-Reagan Institute Consensus Group, 1997). Homogenates were then prepared from dissected gray matters from four pooled AD patients in phosphate buffered saline (PBS, pH 7.4) at the concentration of approximately 100 mg we…		Radioligand Displacement	Competition binding assays were carried out in 12 × 75 mm borosilicate glass tubes. The reaction mixture contained 50 μL of pooled AD brain homogenates (20−50 μg), 50 μL of [125I]IMPY, 4, (0.04−0.06 nM diluted in PBS), and 50 μL of inhibitors (10-5−10-10 M diluted serially in PBS containing 0.1% bovine serum albumin) in a final volume of 1 mL. Nonspecific binding was defined in the presence of 60…	InChI=1S/C21H24FNO3/c1-23-20-8-4-18(5-9-20)2-3-19-6-10-21(11-7-19)26-17-16-25-15-14-24-13-12-22/h4-11,23H,12-17H2,1H3	InChI=1S/C21H24FNO3/c1-23-20-8-4-18(5-9-20)2-3-19-6-10-21(11-7-19)26-17-16-25-15-14-24-13-12-22/h4-11,23H,12-17H2,1H3	357.425	3.5096	101.5187	4	1	39.72	2	10	2	0	0.333333333	26	0	0	2	0	5	0	0	0	0.491194678	0.119005987	0.119005987	-0.491194678	21	4	26	0.807692308	0.153846154	2
Chandra2007-14b	CN(C)C1=CC=C(C#CC2=CC=C(OCCOCCOCCF)C=C2)C=C1	10.1021/jm070090j			2.9	2.9		0.1	-8.537602002	[125I]IMPY	AD	b	AD brain homogenate	AD postmortem brain tissues were obtained from University of Washington Alzheimer's Disease Research Center, and neuropathological diagnosis was confirmed by current criteria (NIA-Reagan Institute Consensus Group, 1997). Homogenates were then prepared from dissected gray matters from four pooled AD patients in phosphate buffered saline (PBS, pH 7.4) at the concentration of approximately 100 mg we…		Radioligand Displacement	Competition binding assays were carried out in 12 × 75 mm borosilicate glass tubes. The reaction mixture contained 50 μL of pooled AD brain homogenates (20−50 μg), 50 μL of [125I]IMPY, 4, (0.04−0.06 nM diluted in PBS), and 50 μL of inhibitors (10-5−10-10 M diluted serially in PBS containing 0.1% bovine serum albumin) in a final volume of 1 mL. Nonspecific binding was defined in the presence of 60…	InChI=1S/C22H26FNO3/c1-24(2)21-9-5-19(6-10-21)3-4-20-7-11-22(12-8-20)27-18-17-26-16-15-25-14-13-23/h5-12H,13-18H2,1-2H3	InChI=1S/C22H26FNO3/c1-24(2)21-9-5-19(6-10-21)3-4-20-7-11-22(12-8-20)27-18-17-26-16-15-25-14-13-23/h5-12H,13-18H2,1-2H3	371.452	3.5339	106.299	4	0	30.93	2	10	2	0	0.363636364	27	0	0	2	0	5	0	0	0	0.491194678	0.119005987	0.119005987	-0.491194678	22	4	27	0.814814815	0.148148148	2
Chandra2007-17	OC1=CC=C(C#CC2=CC=C(OCCOCCOCCF)C=C2)C=C1	10.1021/jm070090j			16.5	16.5		3.5	-7.782516056	[125I]IMPY	AD	b	AD brain homogenate	AD postmortem brain tissues were obtained from University of Washington Alzheimer's Disease Research Center, and neuropathological diagnosis was confirmed by current criteria (NIA-Reagan Institute Consensus Group, 1997). Homogenates were then prepared from dissected gray matters from four pooled AD patients in phosphate buffered saline (PBS, pH 7.4) at the concentration of approximately 100 mg we…		Radioligand Displacement	Competition binding assays were carried out in 12 × 75 mm borosilicate glass tubes. The reaction mixture contained 50 μL of pooled AD brain homogenates (20−50 μg), 50 μL of [125I]IMPY, 4, (0.04−0.06 nM diluted in PBS), and 50 μL of inhibitors (10-5−10-10 M diluted serially in PBS containing 0.1% bovine serum albumin) in a final volume of 1 mL. Nonspecific binding was defined in the presence of 60…	InChI=1S/C20H21FO4/c21-11-12-23-13-14-24-15-16-25-20-9-5-18(6-10-20)2-1-17-3-7-19(22)8-4-17/h3-10,22H,11-16H2	InChI=1S/C20H21FO4/c21-11-12-23-13-14-24-15-16-25-20-9-5-18(6-10-20)2-1-17-3-7-19(22)8-4-17/h3-10,22H,11-16H2	344.382	3.1735	93.6368	4	1	47.92	2	9	2	0	0.3	25	0	0	2	0	5	0	0	0	0.50796548	0.119005987	0.119005987	-0.50796548	20	4	25	0.8	0.16	2
Chandra2007-19b	NC1=CC=C(C#CC2=CC=C(OCCOCCOCCO)C=C2)C=C1	10.1021/jm070090j			67.5	67.5		7.5	-7.170696227	[125I]IMPY	AD	b	AD brain homogenate	AD postmortem brain tissues were obtained from University of Washington Alzheimer's Disease Research Center, and neuropathological diagnosis was confirmed by current criteria (NIA-Reagan Institute Consensus Group, 1997). Homogenates were then prepared from dissected gray matters from four pooled AD patients in phosphate buffered saline (PBS, pH 7.4) at the concentration of approximately 100 mg we…		Radioligand Displacement	Competition binding assays were carried out in 12 × 75 mm borosilicate glass tubes. The reaction mixture contained 50 μL of pooled AD brain homogenates (20−50 μg), 50 μL of [125I]IMPY, 4, (0.04−0.06 nM diluted in PBS), and 50 μL of inhibitors (10-5−10-10 M diluted serially in PBS containing 0.1% bovine serum albumin) in a final volume of 1 mL. Nonspecific binding was defined in the presence of 60…	InChI=1S/C20H23NO4/c21-19-7-3-17(4-8-19)1-2-18-5-9-20(10-6-18)25-16-15-24-14-13-23-12-11-22/h3-10,22H,11-16,21H2	InChI=1S/C20H23NO4/c21-19-7-3-17(4-8-19)1-2-18-5-9-20(10-6-18)25-16-15-24-14-13-23-12-11-22/h3-10,22H,11-16,21H2	341.407	2.0729	97.4952	5	2	73.94	2	9	2	0	0.3	25	0	0	2	0	5	0	0	0	0.491194678	0.119005987	0.119005987	-0.491194678	20	5	25	0.8	0.2	2
Chandra2007-20b	OCCOCCOCCOC(C=C1)=CC=C1C#CC(C=C2)=CC=C2NC	10.1021/jm070090j			4.5	4.5		0.9	-8.346787486	[125I]IMPY	AD	b	AD brain homogenate	AD postmortem brain tissues were obtained from University of Washington Alzheimer's Disease Research Center, and neuropathological diagnosis was confirmed by current criteria (NIA-Reagan Institute Consensus Group, 1997). Homogenates were then prepared from dissected gray matters from four pooled AD patients in phosphate buffered saline (PBS, pH 7.4) at the concentration of approximately 100 mg we…		Radioligand Displacement	Competition binding assays were carried out in 12 × 75 mm borosilicate glass tubes. The reaction mixture contained 50 μL of pooled AD brain homogenates (20−50 μg), 50 μL of [125I]IMPY, 4, (0.04−0.06 nM diluted in PBS), and 50 μL of inhibitors (10-5−10-10 M diluted serially in PBS containing 0.1% bovine serum albumin) in a final volume of 1 mL. Nonspecific binding was defined in the presence of 60…	InChI=1S/C21H25NO4/c1-22-20-8-4-18(5-9-20)2-3-19-6-10-21(11-7-19)26-17-16-25-15-14-24-13-12-23/h4-11,22-23H,12-17H2,1H3	InChI=1S/C21H25NO4/c1-22-20-8-4-18(5-9-20)2-3-19-6-10-21(11-7-19)26-17-16-25-15-14-24-13-12-23/h4-11,22-23H,12-17H2,1H3	355.434	2.5324	102.6295	5	2	59.95	2	10	2	0	0.333333333	26	0	0	2	0	5	0	0	0	0.491194678	0.119005987	0.119005987	-0.491194678	21	5	26	0.807692308	0.192307692	2
Chandra2007-23b	OCCOCCOCCOC(C=C1)=CC=C1C#CC(C=C2)=CC=C2N(C)C	10.1021/jm070090j			3.4	3.4		0.1	-8.468521083	[125I]IMPY	AD	b	AD brain homogenate	AD postmortem brain tissues were obtained from University of Washington Alzheimer's Disease Research Center, and neuropathological diagnosis was confirmed by current criteria (NIA-Reagan Institute Consensus Group, 1997). Homogenates were then prepared from dissected gray matters from four pooled AD patients in phosphate buffered saline (PBS, pH 7.4) at the concentration of approximately 100 mg we…		Radioligand Displacement	Competition binding assays were carried out in 12 × 75 mm borosilicate glass tubes. The reaction mixture contained 50 μL of pooled AD brain homogenates (20−50 μg), 50 μL of [125I]IMPY, 4, (0.04−0.06 nM diluted in PBS), and 50 μL of inhibitors (10-5−10-10 M diluted serially in PBS containing 0.1% bovine serum albumin) in a final volume of 1 mL. Nonspecific binding was defined in the presence of 60…	InChI=1S/C22H27NO4/c1-23(2)21-9-5-19(6-10-21)3-4-20-7-11-22(12-8-20)27-18-17-26-16-15-25-14-13-24/h5-12,24H,13-18H2,1-2H3	InChI=1S/C22H27NO4/c1-23(2)21-9-5-19(6-10-21)3-4-20-7-11-22(12-8-20)27-18-17-26-16-15-25-14-13-24/h5-12,24H,13-18H2,1-2H3	369.461	2.5567	107.4098	5	1	51.16	2	10	2	0	0.363636364	27	0	0	2	0	5	0	0	0	0.491194678	0.119005987	0.119005987	-0.491194678	22	5	27	0.814814815	0.185185185	2
Chang2006-2a	COC(C=C1)=CC=C1C2=CC3=CC=CC=C3S2	10.1016/j.nucmedbio.2006.06.006			0.4	0.4		0.19	-9.397940009	[125I]Chang2006-5	Ab40	f		Aggregation of peptides was carried out by gently dissolving the peptide [0.5 mg/mL for AB(1-40)] in a buffer solution (pH 7.4) containing 10 mM sodium phosphate and 1 mM EDTA. The solutions were incubated at 37 °C for 36-42 h with gentle and constant shaking.		Radioligand Displacement	The binding affinities of benzothiophene derivatives to Ab aggregates were evaluated by competitive binding assays using [125I]5 as a radioligand. 100 uL of Ab aggregates (20 nM in the final mixture), 100 uL of benzothiophene derivatives (10^-6 – 10^-12 M in 50% ethanol containing 1 mM EDTA), 100 uL of [125I]5 in 50% ethanol (0.1 nM in the final mixture) and 700 uL of phosphate-buffered saline (p…	InChI=1S/C15H12OS/c1-16-13-8-6-11(7-9-13)15-10-12-4-2-3-5-14(12)17-15/h2-10H,1H3	InChI=1S/C15H12OS/c1-16-13-8-6-11(7-9-13)15-10-12-4-2-3-5-14(12)17-15/h2-10H,1H3	240.327	4.5769	73.813	2	0	9.23	3	2	3	0	0.066666667	17	0	0	2	1	2	0	0	0	0.496767811	0.118402263	0.118402263	-0.496767811	15	2	17	0.882352941	0.117647059	0
Chang2006-2a	COC(C=C1)=CC=C1C2=CC3=CC=CC=C3S2	10.1016/j.nucmedbio.2006.06.006			0.52	0.52		0.14	-9.283996656	[125I]Chang2006-5	Ab42	f		Aggregation of peptides was carried out by gently dissolving the peptide [1.0 mg/mL for AB(1-42)] in a buffer solution (pH 7.4) containing 10 mM sodium phosphate and 1 mM EDTA. The solutions were incubated at 37 °C for 36-42 h with gentle and constant shaking.		Radioligand Displacement	The binding affinities of benzothiophene derivatives to Ab aggregates were evaluated by competitive binding assays using [125I]5 as a radioligand. One hundred microliters of Ab aggregates (20 nM in the final mixture), 100 uL of benzothiophene derivatives (10^-6 – 10^-12 M in 50% ethanol containing 1 mM EDTA), 100 uL of [125I]5 in 50% ethanol (0.1 nM in the final mixture) and 700 uL of phosphate-b…	InChI=1S/C15H12OS/c1-16-13-8-6-11(7-9-13)15-10-12-4-2-3-5-14(12)17-15/h2-10H,1H3	InChI=1S/C15H12OS/c1-16-13-8-6-11(7-9-13)15-10-12-4-2-3-5-14(12)17-15/h2-10H,1H3	240.327	4.5769	73.813	2	0	9.23	3	2	3	0	0.066666667	17	0	0	2	1	2	0	0	0	0.496767811	0.118402263	0.118402263	-0.496767811	15	2	17	0.882352941	0.117647059	0
Chang2006-2b	OC(C=C1)=CC=C1C2=CC3=CC=CC=C3S2	10.1016/j.nucmedbio.2006.06.006			3.04	3.04		1.42	-8.517126416	[125I]Chang2006-5	Ab40	f		Aggregation of peptides was carried out by gently dissolving the peptide [0.5 mg/mL for AB(1-40)] in a buffer solution (pH 7.4) containing 10 mM sodium phosphate and 1 mM EDTA. The solutions were incubated at 37 °C for 36-42 h with gentle and constant shaking.		Radioligand Displacement	The binding affinities of benzothiophene derivatives to Ab aggregates were evaluated by competitive binding assays using [125I]5 as a radioligand. One hundred microliters of Ab aggregates (20 nM in the final mixture), 100 uL of benzothiophene derivatives (10^-6 – 10^-12 M in 50% ethanol containing 1 mM EDTA), 100 uL of [125I]5 in 50% ethanol (0.1 nM in the final mixture) and 700 uL of phosphate-b…	InChI=1S/C14H10OS/c15-12-7-5-10(6-8-12)14-9-11-3-1-2-4-13(11)16-14/h1-9,15H	InChI=1S/C14H10OS/c15-12-7-5-10(6-8-12)14-9-11-3-1-2-4-13(11)16-14/h1-9,15H	226.3	4.2739	68.9258	2	1	20.23	3	1	3	0	0	16	0	0	2	1	2	0	0	0	0.507966237	0.115119367	0.115119367	-0.507966237	14	2	16	0.875	0.125	0
Chang2006-2b	OC(C=C1)=CC=C1C2=CC3=CC=CC=C3S2	10.1016/j.nucmedbio.2006.06.006			3.72	3.72		0.66	-8.42945706	[125I]Chang2006-5	Ab42	f		Aggregation of peptides was carried out by gently dissolving the peptide [1.0 mg/mL for AB(1-42)] in a buffer solution (pH 7.4) containing 10 mM sodium phosphate and 1 mM EDTA. The solutions were incubated at 37 °C for 36-42 h with gentle and constant shaking.		Radioligand Displacement	The binding affinities of benzothiophene derivatives to Ab aggregates were evaluated by competitive binding assays using [125I]5 as a radioligand. One hundred microliters of Ab aggregates (20 nM in the final mixture), 100 uL of benzothiophene derivatives (10^-6 – 10^-12 M in 50% ethanol containing 1 mM EDTA), 100 uL of [125I]5 in 50% ethanol (0.1 nM in the final mixture) and 700 uL of phosphate-b…	InChI=1S/C14H10OS/c15-12-7-5-10(6-8-12)14-9-11-3-1-2-4-13(11)16-14/h1-9,15H	InChI=1S/C14H10OS/c15-12-7-5-10(6-8-12)14-9-11-3-1-2-4-13(11)16-14/h1-9,15H	226.3	4.2739	68.9258	2	1	20.23	3	1	3	0	0	16	0	0	2	1	2	0	0	0	0.507966237	0.115119367	0.115119367	-0.507966237	14	2	16	0.875	0.125	0
Chang2006-2c	FCCOC(C=C1)=CC=C1C2=CC3=CC=CC=C3S2	10.1016/j.nucmedbio.2006.06.006			0.67	0.67		0.5	-9.173925197	[125I]Chang2006-5	Ab40	f		Aggregation of peptides was carried out by gently dissolving the peptide [0.5 mg/mL for AB(1-40)] in a buffer solution (pH 7.4) containing 10 mM sodium phosphate and 1 mM EDTA. The solutions were incubated at 37 °C for 36-42 h with gentle and constant shaking.		Radioligand Displacement	The binding affinities of benzothiophene derivatives to Ab aggregates were evaluated by competitive binding assays using [125I]5 as a radioligand. One hundred microliters of Ab aggregates (20 nM in the final mixture), 100 uL of benzothiophene derivatives (10^-6 – 10^-12 M in 50% ethanol containing 1 mM EDTA), 100 uL of [125I]5 in 50% ethanol (0.1 nM in the final mixture) and 700 uL of phosphate-b…	InChI=1S/C16H13FOS/c17-9-10-18-14-7-5-12(6-8-14)16-11-13-3-1-2-4-15(13)19-16/h1-8,11H,9-10H2	InChI=1S/C16H13FOS/c17-9-10-18-14-7-5-12(6-8-14)16-11-13-3-1-2-4-15(13)19-16/h1-8,11H,9-10H2	272.344	4.9166	78.731	2	0	9.23	3	4	3	0	0.125	19	0	0	2	1	3	0	0	0	0.490873035	0.123411864	0.123411864	-0.490873035	16	2	19	0.842105263	0.105263158	0
Chang2006-2c	FCCOC(C=C1)=CC=C1C2=CC3=CC=CC=C3S2	10.1016/j.nucmedbio.2006.06.006			0.87	0.87		0.24	-9.060480747	[125I]Chang2006-5	Ab42	f		Aggregation of peptides was carried out by gently dissolving the peptide [1.0 mg/mL for AB(1-42)] in a buffer solution (pH 7.4) containing 10 mM sodium phosphate and 1 mM EDTA. The solutions were incubated at 37 °C for 36-42 h with gentle and constant shaking.		Radioligand Displacement	The binding affinities of benzothiophene derivatives to Ab aggregates were evaluated by competitive binding assays using [125I]5 as a radioligand. One hundred microliters of Ab aggregates (20 nM in the final mixture), 100 uL of benzothiophene derivatives (10^-6 – 10^-12 M in 50% ethanol containing 1 mM EDTA), 100 uL of [125I]5 in 50% ethanol (0.1 nM in the final mixture) and 700 uL of phosphate-b…	InChI=1S/C16H13FOS/c17-9-10-18-14-7-5-12(6-8-14)16-11-13-3-1-2-4-15(13)19-16/h1-8,11H,9-10H2	InChI=1S/C16H13FOS/c17-9-10-18-14-7-5-12(6-8-14)16-11-13-3-1-2-4-15(13)19-16/h1-8,11H,9-10H2	272.344	4.9166	78.731	2	0	9.23	3	4	3	0	0.125	19	0	0	2	1	3	0	0	0	0.490873035	0.123411864	0.123411864	-0.490873035	16	2	19	0.842105263	0.105263158	0
Chang2006-2d	FCCCOC(C=C1)=CC=C1C2=CC3=CC=CC=C3S2	10.1016/j.nucmedbio.2006.06.006			0.65	0.65		0.38	-9.187086643	[125I]Chang2006-5	Ab40	f		Aggregation of peptides was carried out by gently dissolving the peptide [0.5 mg/mL for AB(1-40)] in a buffer solution (pH 7.4) containing 10 mM sodium phosphate and 1 mM EDTA. The solutions were incubated at 37 °C for 36-42 h with gentle and constant shaking.		Radioligand Displacement	The binding affinities of benzothiophene derivatives to Ab aggregates were evaluated by competitive binding assays using [125I]5 as a radioligand. One hundred microliters of Ab aggregates (20 nM in the final mixture), 100 uL of benzothiophene derivatives (10^-6 – 10^-12 M in 50% ethanol containing 1 mM EDTA), 100 uL of [125I]5 in 50% ethanol (0.1 nM in the final mixture) and 700 uL of phosphate-b…	InChI=1S/C17H15FOS/c18-10-3-11-19-15-8-6-13(7-9-15)17-12-14-4-1-2-5-16(14)20-17/h1-2,4-9,12H,3,10-11H2	InChI=1S/C17H15FOS/c18-10-3-11-19-15-8-6-13(7-9-15)17-12-14-4-1-2-5-16(14)20-17/h1-2,4-9,12H,3,10-11H2	286.371	5.3067	83.348	2	0	9.23	3	5	3	0	0.176470588	20	0	0	2	1	3	0	0	0	0.493499891	0.118832207	0.118832207	-0.493499891	17	2	20	0.85	0.1	0
Chang2006-2d	FCCCOC(C=C1)=CC=C1C2=CC3=CC=CC=C3S2	10.1016/j.nucmedbio.2006.06.006			0.73	0.73		0.44	-9.13667714	[125I]Chang2006-5	Ab42	f		Aggregation of peptides was carried out by gently dissolving the peptide [1.0 mg/mL for AB(1-42)] in a buffer solution (pH 7.4) containing 10 mM sodium phosphate and 1 mM EDTA. The solutions were incubated at 37 °C for 36-42 h with gentle and constant shaking.		Radioligand Displacement	The binding affinities of benzothiophene derivatives to Ab aggregates were evaluated by competitive binding assays using [125I]5 as a radioligand. One hundred microliters of Ab aggregates (20 nM in the final mixture), 100 uL of benzothiophene derivatives (10^-6 – 10^-12 M in 50% ethanol containing 1 mM EDTA), 100 uL of [125I]5 in 50% ethanol (0.1 nM in the final mixture) and 700 uL of phosphate-b…	InChI=1S/C17H15FOS/c18-10-3-11-19-15-8-6-13(7-9-15)17-12-14-4-1-2-5-16(14)20-17/h1-2,4-9,12H,3,10-11H2	InChI=1S/C17H15FOS/c18-10-3-11-19-15-8-6-13(7-9-15)17-12-14-4-1-2-5-16(14)20-17/h1-2,4-9,12H,3,10-11H2	286.371	5.3067	83.348	2	0	9.23	3	5	3	0	0.176470588	20	0	0	2	1	3	0	0	0	0.493499891	0.118832207	0.118832207	-0.493499891	17	2	20	0.85	0.1	0
Chang2006-3b	NC(C=C1)=CC=C1C2=CC3=CC=CC=C3S2	10.1016/j.nucmedbio.2006.06.006			4.31	4.31		3.04	-8.36552273	[125I]Chang2006-5	Ab40	f		Aggregation of peptides was carried out by gently dissolving the peptide [0.5 mg/mL for AB(1-40)] in a buffer solution (pH 7.4) containing 10 mM sodium phosphate and 1 mM EDTA. The solutions were incubated at 37 °C for 36-42 h with gentle and constant shaking.		Radioligand Displacement	The binding affinities of benzothiophene derivatives to Ab aggregates were evaluated by competitive binding assays using [125I]5 as a radioligand. One hundred microliters of Ab aggregates (20 nM in the final mixture), 100 uL of benzothiophene derivatives (10^-6 – 10^-12 M in 50% ethanol containing 1 mM EDTA), 100 uL of [125I]5 in 50% ethanol (0.1 nM in the final mixture) and 700 uL of phosphate-b…	InChI=1S/C14H11NS/c15-12-7-5-10(6-8-12)14-9-11-3-1-2-4-13(11)16-14/h1-9H,15H2	InChI=1S/C14H11NS/c15-12-7-5-10(6-8-12)14-9-11-3-1-2-4-13(11)16-14/h1-9H,15H2	225.316	4.1505	71.6734	2	1	26.02	3	1	3	0	0	16	0	0	2	1	2	0	0	0	0.398728251	0.035484284	0.035484284	-0.398728251	14	2	16	0.875	0.125	0
Chang2006-3b	NC(C=C1)=CC=C1C2=CC3=CC=CC=C3S2	10.1016/j.nucmedbio.2006.06.006			6.5	6.5		1.88	-8.187086643	[125I]Chang2006-5	Ab42	f		Aggregation of peptides was carried out by gently dissolving the peptide [1.0 mg/mL for AB(1-42)] in a buffer solution (pH 7.4) containing 10 mM sodium phosphate and 1 mM EDTA. The solutions were incubated at 37 °C for 36-42 h with gentle and constant shaking.		Radioligand Displacement	The binding affinities of benzothiophene derivatives to Ab aggregates were evaluated by competitive binding assays using [125I]5 as a radioligand. One hundred microliters of Ab aggregates (20 nM in the final mixture), 100 uL of benzothiophene derivatives (10^-6 – 10^-12 M in 50% ethanol containing 1 mM EDTA), 100 uL of [125I]5 in 50% ethanol (0.1 nM in the final mixture) and 700 uL of phosphate-b…	InChI=1S/C14H11NS/c15-12-7-5-10(6-8-12)14-9-11-3-1-2-4-13(11)16-14/h1-9H,15H2	InChI=1S/C14H11NS/c15-12-7-5-10(6-8-12)14-9-11-3-1-2-4-13(11)16-14/h1-9H,15H2	225.316	4.1505	71.6734	2	1	26.02	3	1	3	0	0	16	0	0	2	1	2	0	0	0	0.398728251	0.035484284	0.035484284	-0.398728251	14	2	16	0.875	0.125	0
Chang2006-3c	CNC(C=C1)=CC=C1C2=CC3=CC=CC=C3S2	10.1016/j.nucmedbio.2006.06.006			0.28	0.28		0.09	-9.552841969	[125I]Chang2006-5	Ab40	f		Aggregation of peptides was carried out by gently dissolving the peptide [0.5 mg/mL for AB(1-40)] in a buffer solution (pH 7.4) containing 10 mM sodium phosphate and 1 mM EDTA. The solutions were incubated at 37 °C for 36-42 h with gentle and constant shaking.		Radioligand Displacement	The binding affinities of benzothiophene derivatives to Ab aggregates were evaluated by competitive binding assays using [125I]5 as a radioligand. One hundred microliters of Ab aggregates (20 nM in the final mixture), 100 uL of benzothiophene derivatives (10^-6 – 10^-12 M in 50% ethanol containing 1 mM EDTA), 100 uL of [125I]5 in 50% ethanol (0.1 nM in the final mixture) and 700 uL of phosphate-b…	InChI=1S/C15H13NS/c1-16-13-8-6-11(7-9-13)15-10-12-4-2-3-5-14(12)17-15/h2-10,16H,1H3	InChI=1S/C15H13NS/c1-16-13-8-6-11(7-9-13)15-10-12-4-2-3-5-14(12)17-15/h2-10,16H,1H3	239.343	4.61	76.8077	2	1	12.03	3	2	3	0	0.066666667	17	0	0	2	1	2	0	0	0	0.38812149	0.035484286	0.035484286	-0.38812149	15	2	17	0.882352941	0.117647059	0
Chang2006-3c	CNC(C=C1)=CC=C1C2=CC3=CC=CC=C3S2	10.1016/j.nucmedbio.2006.06.006			0.72	0.72		0.16	-9.142667504	[125I]Chang2006-5	Ab42	f		Aggregation of peptides was carried out by gently dissolving the peptide [1.0 mg/mL for AB(1-42)] in a buffer solution (pH 7.4) containing 10 mM sodium phosphate and 1 mM EDTA. The solutions were incubated at 37 °C for 36-42 h with gentle and constant shaking.		Radioligand Displacement	The binding affinities of benzothiophene derivatives to Ab aggregates were evaluated by competitive binding assays using [125I]5 as a radioligand. One hundred microliters of Ab aggregates (20 nM in the final mixture), 100 uL of benzothiophene derivatives (10^-6 – 10^-12 M in 50% ethanol containing 1 mM EDTA), 100 uL of [125I]5 in 50% ethanol (0.1 nM in the final mixture) and 700 uL of phosphate-b…	InChI=1S/C15H13NS/c1-16-13-8-6-11(7-9-13)15-10-12-4-2-3-5-14(12)17-15/h2-10,16H,1H3	InChI=1S/C15H13NS/c1-16-13-8-6-11(7-9-13)15-10-12-4-2-3-5-14(12)17-15/h2-10,16H,1H3	239.343	4.61	76.8077	2	1	12.03	3	2	3	0	0.066666667	17	0	0	2	1	2	0	0	0	0.38812149	0.035484286	0.035484286	-0.38812149	15	2	17	0.882352941	0.117647059	0
Chang2006-3d	CN(C)C(C=C1)=CC=C1C2=CC3=CC=CC=C3S2	10.1016/j.nucmedbio.2006.06.006			1.06	1.06		0.84	-8.974694135	[125I]Chang2006-5	Ab40	f		Aggregation of peptides was carried out by gently dissolving the peptide [0.5 mg/mL for AB(1-40)] in a buffer solution (pH 7.4) containing 10 mM sodium phosphate and 1 mM EDTA. The solutions were incubated at 37 °C for 36-42 h with gentle and constant shaking.		Radioligand Displacement	The binding affinities of benzothiophene derivatives to Ab aggregates were evaluated by competitive binding assays using [125I]5 as a radioligand. One hundred microliters of Ab aggregates (20 nM in the final mixture), 100 uL of benzothiophene derivatives (10^-6 – 10^-12 M in 50% ethanol containing 1 mM EDTA), 100 uL of [125I]5 in 50% ethanol (0.1 nM in the final mixture) and 700 uL of phosphate-b…	InChI=1S/C16H15NS/c1-17(2)14-9-7-12(8-10-14)16-11-13-5-3-4-6-15(13)18-16/h3-11H,1-2H3	InChI=1S/C16H15NS/c1-17(2)14-9-7-12(8-10-14)16-11-13-5-3-4-6-15(13)18-16/h3-11H,1-2H3	253.37	4.6343	81.588	2	0	3.24	3	2	3	0	0.125	18	0	0	2	1	2	0	0	0	0.377660899	0.036093234	0.036093234	-0.377660899	16	2	18	0.888888889	0.111111111	0
Chang2006-3d	CN(C)C(C=C1)=CC=C1C2=CC3=CC=CC=C3S2	10.1016/j.nucmedbio.2006.06.006			0.63	0.63		0.29	-9.200659451	[125I]Chang2006-5	Ab42	f		Aggregation of peptides was carried out by gently dissolving the peptide [1.0 mg/mL for AB(1-42)] in a buffer solution (pH 7.4) containing 10 mM sodium phosphate and 1 mM EDTA. The solutions were incubated at 37 °C for 36-42 h with gentle and constant shaking.		Radioligand Displacement	The binding affinities of benzothiophene derivatives to Ab aggregates were evaluated by competitive binding assays using [125I]5 as a radioligand. One hundred microliters of Ab aggregates (20 nM in the final mixture), 100 uL of benzothiophene derivatives (10^-6 – 10^-12 M in 50% ethanol containing 1 mM EDTA), 100 uL of [125I]5 in 50% ethanol (0.1 nM in the final mixture) and 700 uL of phosphate-b…	InChI=1S/C16H15NS/c1-17(2)14-9-7-12(8-10-14)16-11-13-5-3-4-6-15(13)18-16/h3-11H,1-2H3	InChI=1S/C16H15NS/c1-17(2)14-9-7-12(8-10-14)16-11-13-5-3-4-6-15(13)18-16/h3-11H,1-2H3	253.37	4.6343	81.588	2	0	3.24	3	2	3	0	0.125	18	0	0	2	1	2	0	0	0	0.377660899	0.036093234	0.036093234	-0.377660899	16	2	18	0.888888889	0.111111111	0
Chang2006-3e	FCCNC(C=C1)=CC=C1C2=CC3=CC=CC=C3S2	10.1016/j.nucmedbio.2006.06.006			1.56	1.56		0.45	-8.806875402	[125I]Chang2006-5	Ab40	f		Aggregation of peptides was carried out by gently dissolving the peptide [0.5 mg/mL for AB(1-40)] in a buffer solution (pH 7.4) containing 10 mM sodium phosphate and 1 mM EDTA. The solutions were incubated at 37 °C for 36-42 h with gentle and constant shaking.		Radioligand Displacement	The binding affinities of benzothiophene derivatives to Ab aggregates were evaluated by competitive binding assays using [125I]5 as a radioligand. One hundred microliters of Ab aggregates (20 nM in the final mixture), 100 uL of benzothiophene derivatives (10^-6 – 10^-12 M in 50% ethanol containing 1 mM EDTA), 100 uL of [125I]5 in 50% ethanol (0.1 nM in the final mixture) and 700 uL of phosphate-b…	InChI=1S/C16H14FNS/c17-9-10-18-14-7-5-12(6-8-14)16-11-13-3-1-2-4-15(13)19-16/h1-8,11,18H,9-10H2	InChI=1S/C16H14FNS/c17-9-10-18-14-7-5-12(6-8-14)16-11-13-3-1-2-4-15(13)19-16/h1-8,11,18H,9-10H2	271.36	4.9497	81.7257	2	1	12.03	3	4	3	0	0.125	19	0	0	2	1	3	0	0	0	0.382419578	0.106620994	0.106620994	-0.382419578	16	2	19	0.842105263	0.105263158	0
Chang2006-3e	FCCNC(C=C1)=CC=C1C2=CC3=CC=CC=C3S2	10.1016/j.nucmedbio.2006.06.006			0.98	0.98		0.01	-9.008773924	[125I]Chang2006-5	Ab42	f		Aggregation of peptides was carried out by gently dissolving the peptide [1.0 mg/mL for AB(1-42)] in a buffer solution (pH 7.4) containing 10 mM sodium phosphate and 1 mM EDTA. The solutions were incubated at 37 °C for 36-42 h with gentle and constant shaking.		Radioligand Displacement	The binding affinities of benzothiophene derivatives to Ab aggregates were evaluated by competitive binding assays using [125I]5 as a radioligand. One hundred microliters of Ab aggregates (20 nM in the final mixture), 100 uL of benzothiophene derivatives (10^-6 – 10^-12 M in 50% ethanol containing 1 mM EDTA), 100 uL of [125I]5 in 50% ethanol (0.1 nM in the final mixture) and 700 uL of phosphate-b…	InChI=1S/C16H14FNS/c17-9-10-18-14-7-5-12(6-8-14)16-11-13-3-1-2-4-15(13)19-16/h1-8,11,18H,9-10H2	InChI=1S/C16H14FNS/c17-9-10-18-14-7-5-12(6-8-14)16-11-13-3-1-2-4-15(13)19-16/h1-8,11,18H,9-10H2	271.36	4.9497	81.7257	2	1	12.03	3	4	3	0	0.125	19	0	0	2	1	3	0	0	0	0.382419578	0.106620994	0.106620994	-0.382419578	16	2	19	0.842105263	0.105263158	0
Chang2006-3f	FCCCNC(C=C1)=CC=C1C2=CC3=CC=CC=C3S2	10.1016/j.nucmedbio.2006.06.006			0.73	0.73		0.47	-9.13667714	[125I]Chang2006-5	Ab40	f		Aggregation of peptides was carried out by gently dissolving the peptide [0.5 mg/mL for AB(1-40)] in a buffer solution (pH 7.4) containing 10 mM sodium phosphate and 1 mM EDTA. The solutions were incubated at 37 °C for 36-42 h with gentle and constant shaking.		Radioligand Displacement	The binding affinities of benzothiophene derivatives to Ab aggregates were evaluated by competitive binding assays using [125I]5 as a radioligand. One hundred microliters of Ab aggregates (20 nM in the final mixture), 100 uL of benzothiophene derivatives (10^-6 – 10^-12 M in 50% ethanol containing 1 mM EDTA), 100 uL of [125I]5 in 50% ethanol (0.1 nM in the final mixture) and 700 uL of phosphate-b…	InChI=1S/C17H16FNS/c18-10-3-11-19-15-8-6-13(7-9-15)17-12-14-4-1-2-5-16(14)20-17/h1-2,4-9,12,19H,3,10-11H2	InChI=1S/C17H16FNS/c18-10-3-11-19-15-8-6-13(7-9-15)17-12-14-4-1-2-5-16(14)20-17/h1-2,4-9,12,19H,3,10-11H2	285.387	5.3398	86.3427	2	1	12.03	3	5	3	0	0.176470588	20	0	0	2	1	3	0	0	0	0.384949268	0.091074753	0.091074753	-0.384949268	17	2	20	0.85	0.1	0
Chang2006-3f	FCCCNC(C=C1)=CC=C1C2=CC3=CC=CC=C3S2	10.1016/j.nucmedbio.2006.06.006			0.77	0.77		0.41	-9.113509275	[125I]Chang2006-5	Ab42	f		Aggregation of peptides was carried out by gently dissolving the peptide [1.0 mg/mL for AB(1-42)] in a buffer solution (pH 7.4) containing 10 mM sodium phosphate and 1 mM EDTA. The solutions were incubated at 37 °C for 36-42 h with gentle and constant shaking.		Radioligand Displacement	The binding affinities of benzothiophene derivatives to Ab aggregates were evaluated by competitive binding assays using [125I]5 as a radioligand. One hundred microliters of Ab aggregates (20 nM in the final mixture), 100 uL of benzothiophene derivatives (10^-6 – 10^-12 M in 50% ethanol containing 1 mM EDTA), 100 uL of [125I]5 in 50% ethanol (0.1 nM in the final mixture) and 700 uL of phosphate-b…	InChI=1S/C17H16FNS/c18-10-3-11-19-15-8-6-13(7-9-15)17-12-14-4-1-2-5-16(14)20-17/h1-2,4-9,12,19H,3,10-11H2	InChI=1S/C17H16FNS/c18-10-3-11-19-15-8-6-13(7-9-15)17-12-14-4-1-2-5-16(14)20-17/h1-2,4-9,12,19H,3,10-11H2	285.387	5.3398	86.3427	2	1	12.03	3	5	3	0	0.176470588	20	0	0	2	1	3	0	0	0	0.384949268	0.091074753	0.091074753	-0.384949268	17	2	20	0.85	0.1	0
Chang2006-4 (BTA-1)	CNC(C=C1)=CC=C1C2=NC3=CC=CC=C3S2	10.1016/j.nucmedbio.2006.06.006			28.23	28.23		0.94	-7.549289122	[125I]Chang2006-5	Ab40	f		Aggregation of peptides was carried out by gently dissolving the peptide [0.5 mg/mL for AB(1-40)] in a buffer solution (pH 7.4) containing 10 mM sodium phosphate and 1 mM EDTA. The solutions were incubated at 37 °C for 36-42 h with gentle and constant shaking.		Radioligand Displacement	The binding affinities of benzothiophene derivatives to Ab aggregates were evaluated by competitive binding assays using [125I]5 as a radioligand. One hundred microliters of Ab aggregates (20 nM in the final mixture), 100 uL of benzothiophene derivatives (10^-6 – 10^-12 M in 50% ethanol containing 1 mM EDTA), 100 uL of [125I]5 in 50% ethanol (0.1 nM in the final mixture) and 700 uL of phosphate-b…	InChI=1S/C14H12N2S/c1-15-11-8-6-10(7-9-11)14-16-12-4-2-3-5-13(12)17-14/h2-9,15H,1H3	InChI=1S/C14H12N2S/c1-15-11-8-6-10(7-9-11)14-16-12-4-2-3-5-13(12)17-14/h2-9,15H,1H3	240.331	4.005	74.6027	3	1	24.92	3	2	3	0	0.071428571	17	0	0	2	1	3	0	0	0	0.388121478	0.124105143	0.124105143	-0.388121478	14	3	17	0.823529412	0.176470588	0
Chang2006-4 (BTA-1)	CNC(C=C1)=CC=C1C2=NC3=CC=CC=C3S2	10.1016/j.nucmedbio.2006.06.006			16.33	16.33		1.58	-7.787013815	[125I]Chang2006-5	Ab42	f		Aggregation of peptides was carried out by gently dissolving the peptide [1.0 mg/mL for AB(1-42)] in a buffer solution (pH 7.4) containing 10 mM sodium phosphate and 1 mM EDTA. The solutions were incubated at 37 °C for 36-42 h with gentle and constant shaking.		Radioligand Displacement	The binding affinities of benzothiophene derivatives to Ab aggregates were evaluated by competitive binding assays using [125I]5 as a radioligand. One hundred microliters of Ab aggregates (20 nM in the final mixture), 100 uL of benzothiophene derivatives (10^-6 – 10^-12 M in 50% ethanol containing 1 mM EDTA), 100 uL of [125I]5 in 50% ethanol (0.1 nM in the final mixture) and 700 uL of phosphate-b…	InChI=1S/C14H12N2S/c1-15-11-8-6-10(7-9-11)14-16-12-4-2-3-5-13(12)17-14/h2-9,15H,1H3	InChI=1S/C14H12N2S/c1-15-11-8-6-10(7-9-11)14-16-12-4-2-3-5-13(12)17-14/h2-9,15H,1H3	240.331	4.005	74.6027	3	1	24.92	3	2	3	0	0.071428571	17	0	0	2	1	3	0	0	0	0.388121478	0.124105143	0.124105143	-0.388121478	14	3	17	0.823529412	0.176470588	0
[125I]Chang2006-5	CNC(C([125I])=C1)=CC=C1C2=NC3=CC=CC=C3S2	10.1016/j.nucmedbio.2006.06.006		2.3		2.3		0.33	-8.638272164		Ab40	f		Aggregation of peptides was carried out by gently dissolving the peptide [0.5 mg/mL for AB(1-40)] in a buffer solution (pH 7.4) containing 10 mM sodium phosphate and 1 mM EDTA. The solutions were incubated at 37 °C for 36-42 h with gentle and constant shaking.		Radioligand Saturation	The Kd value of [125I]5 was evaluated using 20 nM Ah aggregates. The	InChI=1S/C14H11IN2S/c1-16-11-7-6-9(8-10(11)15)14-17-12-4-2-3-5-13(12)18-14/h2-8,16H,1H3/i15-2	InChI=1S/C14H11IN2S/c1-16-11-7-6-9(8-10(11)15)14-17-12-4-2-3-5-13(12)18-14/h2-8,16H,1H3	364.2276302	4.6096	87.3197	3	1	24.92	3	2	3	0	0.071428571	18	0	0	2	1	4	0	0	0	0.387265692	0.124142819	0.124142819	-0.387265692	14	3	18	0.777777778	0.166666667	0
[125I]Chang2006-5	CNC(C([125I])=C1)=CC=C1C2=NC3=CC=CC=C3S2	10.1016/j.nucmedbio.2006.06.006		0.44		0.44		0.25	-9.356547324		Ab42	f		Aggregation of peptides was carried out by gently dissolving the peptide [1.0 mg/mL for AB(1-42)] in a buffer solution (pH 7.4) containing 10 mM sodium phosphate and 1 mM EDTA. The solutions were incubated at 37 °C for 36-42 h with gentle and constant shaking.		Radioligand Saturation	The Kd value of [125I]5 was evaluated using 20 nM Ah aggregates. The	InChI=1S/C14H11IN2S/c1-16-11-7-6-9(8-10(11)15)14-17-12-4-2-3-5-13(12)18-14/h2-8,16H,1H3/i15-2	InChI=1S/C14H11IN2S/c1-16-11-7-6-9(8-10(11)15)14-17-12-4-2-3-5-13(12)18-14/h2-8,16H,1H3	364.2276302	4.6096	87.3197	3	1	24.92	3	2	3	0	0.071428571	18	0	0	2	1	4	0	0	0	0.387265692	0.124142819	0.124142819	-0.387265692	14	3	18	0.777777778	0.166666667	0
ANCA-11	O=C(OCCOCCOCCOC)/C(C#N)=C/C1=CC(C=C2)=C(C=C1)C=C2N3CCCCC3	10.1021/cn200018v		1400		1400		200	-5.853871964		Ab42	f		Briefly, we dissolved Aβ42 in PBS pH 7.4 to a final concentration of 100 μM. This solution was magnetically stirred at 1200 rpm for 3 days at room temperature. Aliquots		Fluorescence Saturation	Preaggregated Aβ42 (5 μM final concentration) was mixed with various concentrations of probes (10, 5, 2.5, 1.25 μM) in 5% DMSO in nanopure water, and their Kd’s were determined as described previously.	InChI=1S/C26H32N2O5/c1-30-11-12-31-13-14-32-15-16-33-26(29)24(20-27)18-21-5-6-23-19-25(8-7-22(23)17-21)28-9-3-2-4-10-28/h5-8,17-19H,2-4,9-16H2,1H3/b24-18+	InChI=1S/C26H32N2O5/c1-30-11-12-31-13-14-32-15-16-33-26(29)24(20-27)18-21-5-6-23-19-25(8-7-22(23)17-21)28-9-3-2-4-10-28/h5-8,17-19H,2-4,9-16H2,1H3/b24-18+	452.551	3.95988	128.075	7	0	81.02	3	12	2	1	0.461538462	33	0	1	2	0	7	0	1	1	0.459118278	0.34848438	0.34848438	-0.459118278	26	7	33	0.787878788	0.212121212	1
Chang14	O=C(OCCOCCOCCOC)/C(C#N)=C/C1=CC(C=C2)=C(C=C1)C=C2N3CCN(C)CC3	10.1021/cn200018v		4600		4600		1300	-5.337242168		Ab42	f		Briefly, we dissolved Aβ42 in PBS pH 7.4 to a final concentration of 100 μM. This solution was magnetically stirred at 1200 rpm for 3 days at room temperature. Aliquots		Fluorescence Saturation	Preaggregated Aβ42 (5 μM final concentration) was mixed with various concentrations of probes (10, 5, 2.5, 1.25 μM) in 5% DMSO in nanopure water, and their Kd’s were determined as described previously.	InChI=1S/C26H33N3O5/c1-28-7-9-29(10-8-28)25-6-5-22-17-21(3-4-23(22)19-25)18-24(20-27)26(30)34-16-15-33-14-13-32-12-11-31-2/h3-6,17-19H,7-16H2,1-2H3/b24-18+	InChI=1S/C26H33N3O5/c1-28-7-9-29(10-8-28)25-6-5-22-17-21(3-4-23(22)19-25)18-24(20-27)26(30)34-16-15-33-14-13-32-12-11-31-2/h3-6,17-19H,7-16H2,1-2H3/b24-18+	467.566	2.72138	131.721	8	0	84.26	3	12	2	1	0.461538462	34	0	1	2	0	8	0	1	1	0.459118278	0.34848438	0.34848438	-0.459118278	26	8	34	0.764705882	0.235294118	1
Chang15	O=C(OCCOCCOCCOC)/C(C#N)=C/C1=CC(C=C2)=C(C=C1)C=C2N3CCOCC3	10.1021/cn200018v		13800		13800		3100	-4.860120914		Ab42	f		Briefly, we dissolved Aβ42 in PBS pH 7.4 to a final concentration of 100 μM. This solution was magnetically stirred at 1200 rpm for 3 days at room temperature. Aliquots		Fluorescence Saturation	Preaggregated Aβ42 (5 μM final concentration) was mixed with various concentrations of probes (10, 5, 2.5, 1.25 μM) in 5% DMSO in nanopure water, and their Kd’s were determined as described previously.	InChI=1S/C25H30N2O6/c1-29-10-11-31-12-13-32-14-15-33-25(28)23(19-26)17-20-2-3-22-18-24(5-4-21(22)16-20)27-6-8-30-9-7-27/h2-5,16-18H,6-15H2,1H3/b23-17+	InChI=1S/C25H30N2O6/c1-29-10-11-31-12-13-32-14-15-33-25(28)23(19-26)17-20-2-3-22-18-24(5-4-21(22)16-20)27-6-8-30-9-7-27/h2-5,16-18H,6-15H2,1H3/b23-17+	454.523	2.80618	125.043	8	0	90.25	3	12	2	1	0.44	33	0	1	2	0	8	0	1	1	0.459118278	0.34848438	0.34848438	-0.459118278	25	8	33	0.757575758	0.242424242	1
Chang16	O=C(OCCOCCOCCOC)/C(C#N)=C/C1=CC(C=C2)=C(C=C1)C=C2NCCN3CCOCC3	10.1021/cn200018v		6700		6700		2100	-5.173925197		Ab42	f		Briefly, we dissolved Aβ42 in PBS pH 7.4 to a final concentration of 100 μM. This solution was magnetically stirred at 1200 rpm for 3 days at room temperature. Aliquots		Fluorescence Saturation	Preaggregated Aβ42 (5 μM final concentration) was mixed with various concentrations of probes (10, 5, 2.5, 1.25 μM) in 5% DMSO in nanopure water, and their Kd’s were determined as described previously.	InChI=1S/C27H35N3O6/c1-32-12-13-34-14-15-35-16-17-36-27(31)25(21-28)19-22-2-3-24-20-26(5-4-23(24)18-22)29-6-7-30-8-10-33-11-9-30/h2-5,18-20,29H,6-17H2,1H3/b25-19+	InChI=1S/C27H35N3O6/c1-32-12-13-34-14-15-35-16-17-36-27(31)25(21-28)19-22-2-3-24-20-26(5-4-23(24)18-22)29-6-7-30-8-10-33-11-9-30/h2-5,18-20,29H,6-17H2,1H3/b25-19+	497.592	2.71368	137.7597	9	1	102.28	3	15	2	1	0.481481481	36	0	1	2	0	9	0	1	1	0.459118278	0.34848438	0.34848438	-0.459118278	27	9	36	0.75	0.25	1
Chang17	O=C(OCCOCCOCCOCCOC)/C(C#N)=C/C1=CC(C=C2)=C(C=C1)C=C2N3CCCCC3	10.1021/cn200018v		1600		1600		900	-5.795880017		Ab42	f		Briefly, we dissolved Aβ42 in PBS pH 7.4 to a final concentration of 100 μM. This solution was magnetically stirred at 1200 rpm for 3 days at room temperature. Aliquots		Fluorescence Saturation	Preaggregated Aβ42 (5 μM final concentration) was mixed with various concentrations of probes (10, 5, 2.5, 1.25 μM) in 5% DMSO in nanopure water, and their Kd’s were determined as described previously.	InChI=1S/C28H36N2O6/c1-32-11-12-33-13-14-34-15-16-35-17-18-36-28(31)26(22-29)20-23-5-6-25-21-27(8-7-24(25)19-23)30-9-3-2-4-10-30/h5-8,19-21H,2-4,9-18H2,1H3/b26-20+	InChI=1S/C28H36N2O6/c1-32-11-12-33-13-14-34-15-16-35-17-18-36-28(31)26(22-29)20-23-5-6-25-21-27(8-7-24(25)19-23)30-9-3-2-4-10-30/h5-8,19-21H,2-4,9-18H2,1H3/b26-20+	496.604	3.97648	138.894	8	0	90.25	3	15	2	1	0.5	36	0	1	2	0	8	0	1	1	0.459118278	0.34848438	0.34848438	-0.459118278	28	8	36	0.777777778	0.222222222	1
Chang19	O=C(OCC(CO)O)/C(C#N)=C/C1=CC(C=C2)=C(C=C1)C=C2N3CCCCC3	10.1021/cn200018v		1600		1600		200	-5.795880017		Ab42	f		Briefly, we dissolved Aβ42 in PBS pH 7.4 to a final concentration of 100 μM. This solution was magnetically stirred at 1200 rpm for 3 days at room temperature. Aliquots		Fluorescence Saturation	Preaggregated Aβ42 (5 μM final concentration) was mixed with various concentrations of probes (10, 5, 2.5, 1.25 μM) in 5% DMSO in nanopure water, and their Kd’s were determined as described previously.	InChI=1S/C22H24N2O4/c23-13-19(22(27)28-15-21(26)14-25)11-16-4-5-18-12-20(7-6-17(18)10-16)24-8-2-1-3-9-24/h4-7,10-12,21,25-26H,1-3,8-9,14-15H2/b19-11+	InChI=1S/C22H24N2O4/c23-13-19(22(27)28-15-21(26)14-25)11-16-4-5-18-12-20(7-6-17(18)10-16)24-8-2-1-3-9-24/h4-7,10-12,21,25-26H,1-3,8-9,14-15H2/b19-11+	380.444	2.63348	107.6536	6	2	93.79	3	6	2	1	0.363636364	28	0	1	2	0	6	0	1	1	0.458721798	0.348496538	0.348496538	-0.458721798	22	6	28	0.785714286	0.214285714	1
DRK092	IC1=CN2C(C=C1)=NC(C3=CC=C(C4=CN=CO4)C=C3)=C2	10.1016/j.bmc.2014.05.043			1.054883721	1.054883721	1.08		-8.97679541	[125I]IMPY	Ab40	f	Osaka Peptide Institute (Osaka, Japan)	Ab1-40 peptides (final concentration: 100 nM) were dissolved in 10 mM potassium phosphate buffered saline (PBS, pH7.4) containing 1 mM EDTA and incubated at 37°C for 4 days with gentle and constant shaking. Aggregated Ab fibrils were stored at 4°C until used		Radioligand Displacement	The 100-uL aliquots of synthetic human Ab(1–40) fibrils werecombined with 900 uL of PBS containing [125I]IMPY (0.1 nM), 1% EtOH, and 20 mM ascorbic acid in the presence of compounds witha concentration ranging from 0.04 to 1000 nM. The reaction mixture was incubated at 37°C for 3 h, followed by vacuum filtrationthrough Whatman GF/B filters using a Brandel cell harvester (Model M-24R, Biomedical R…	InChI=1S/C16H10IN3O/c17-13-5-6-16-19-14(9-20(16)8-13)11-1-3-12(4-2-11)15-7-18-10-21-15/h1-10H	InChI=1S/C16H10IN3O/c17-13-5-6-16-19-14(9-20(16)8-13)11-1-3-12(4-2-11)15-7-18-10-21-15/h1-10H	387.18	4.2609	88.842	4	0	43.33	4	2	4	0	0	21	0	0	1	3	5	0	0	0	0.443521559	0.180889227	0.180889227	-0.443521559	16	4	21	0.761904762	0.19047619	0
DRM101	IC1=CN2C(C=C1)=NC(C3=CC=C(C4=NC=CS4)C=C3)=C2	10.1016/j.bmc.2014.05.043			6.710232558	6.710232558	6.87		-8.173262428	[125I]IMPY	Ab40	f	Osaka Peptide Institute (Osaka, Japan)	Ab1-40 peptides (final concentration: 100 nM) were dissolved in 10 mM potassium phosphate buffered saline (PBS, pH7.4) containing 1 mM EDTA and incubated at 37°C for 4 days with gentle and constant shaking. Aggregated Ab fibrils were stored at 4°C until used		Radioligand Displacement	The 100-uL aliquots of synthetic human Ab(1–40) fibrils werecombined with 900 uL of PBS containing [125I]IMPY (0.1 nM), 1% EtOH, and 20 mM ascorbic acid in the presence of compounds witha concentration ranging from 0.04 to 1000 nM. The reaction mixture was incubated at 37°C for 3 h, followed by vacuum filtrationthrough Whatman GF/B filters using a Brandel cell harvester (Model M-24R, Biomedical R…	InChI=1S/C16H10IN3S/c17-13-5-6-15-19-14(10-20(15)9-13)11-1-3-12(4-2-11)16-18-7-8-21-16/h1-10H	InChI=1S/C16H10IN3S/c17-13-5-6-15-19-14(10-20(15)9-13)11-1-3-12(4-2-11)16-18-7-8-21-16/h1-10H	403.248	4.7294	94.453	4	0	30.19	4	2	4	0	0	21	0	0	1	3	5	0	0	0	0.305385009	0.136976662	0.136976662	-0.305385009	16	4	21	0.761904762	0.19047619	0
DRM102	IC1=CN2C(C=C1)=NC(C3=CC=C(C4=NOC=N4)C=C3)=C2	10.1016/j.bmc.2014.05.043			4.053488372	4.053488372	4.15		-8.392171068	[125I]IMPY	Ab40	f	Osaka Peptide Institute (Osaka, Japan)	Ab1-40 peptides (final concentration: 100 nM) were dissolved in 10 mM potassium phosphate buffered saline (PBS, pH7.4) containing 1 mM EDTA and incubated at 37°C for 4 days with gentle and constant shaking. Aggregated Ab fibrils were stored at 4°C until used		Radioligand Displacement	The 100-uL aliquots of synthetic human Ab(1–40) fibrils werecombined with 900 uL of PBS containing [125I]IMPY (0.1 nM), 1% EtOH, and 20 mM ascorbic acid in the presence of compounds witha concentration ranging from 0.04 to 1000 nM. The reaction mixture was incubated at 37°C for 3 h, followed by vacuum filtrationthrough Whatman GF/B filters using a Brandel cell harvester (Model M-24R, Biomedical R…	InChI=1S/C15H9IN4O/c16-12-5-6-14-18-13(8-20(14)7-12)10-1-3-11(4-2-10)15-17-9-21-19-15/h1-9H	InChI=1S/C15H9IN4O/c16-12-5-6-14-18-13(8-20(14)7-12)10-1-3-11(4-2-10)15-17-9-21-19-15/h1-9H	388.168	3.6559	86.637	5	0	56.22	4	2	4	0	0	21	0	0	1	3	6	0	0	0	0.342422926	0.213617319	0.213617319	-0.342422926	15	5	21	0.714285714	0.238095238	0
DRM105	IC1=CN2C(C=C1)=NC(C3=CC=C(C4=NN=NN4)C=C3)=C2	10.1016/j.bmc.2014.05.043			727.5474419	727.5474419	744.87		-6.138138682	[125I]IMPY	Ab40	f	Osaka Peptide Institute (Osaka, Japan)	Ab1-40 peptides (final concentration: 100 nM) were dissolved in 10 mM potassium phosphate buffered saline (PBS, pH7.4) containing 1 mM EDTA and incubated at 37°C for 4 days with gentle and constant shaking. Aggregated Ab fibrils were stored at 4°C until used		Radioligand Displacement	The 100-uL aliquots of synthetic human Ab(1–40) fibrils werecombined with 900 uL of PBS containing [125I]IMPY (0.1 nM), 1% EtOH, and 20 mM ascorbic acid in the presence of compounds witha concentration ranging from 0.04 to 1000 nM. The reaction mixture was incubated at 37°C for 3 h, followed by vacuum filtrationthrough Whatman GF/B filters using a Brandel cell harvester (Model M-24R, Biomedical R…	InChI=1S/C14H9IN6/c15-11-5-6-13-16-12(8-21(13)7-11)9-1-3-10(4-2-9)14-17-19-20-18-14/h1-8H,(H,17,18,19,20)	InChI=1S/C14H9IN6/c15-11-5-6-13-16-12(8-21(13)7-11)9-1-3-10(4-2-9)14-17-19-20-18-14/h1-8H,(H,17,18,19,20)	388.172	2.786	86.5167	5	1	71.76	4	2	4	0	0	21	0	0	1	3	7	0	0	0	0.305385009	0.17890432	0.17890432	-0.305385009	14	6	21	0.666666667	0.285714286	0
DRM106	IC1=CN2C(C=C1)=NC(C3=CC=C(C4=NNC=C4)C=C3)=C2	10.1016/j.bmc.2014.05.043			1.816744186	1.816744186	1.86		-8.740706221	[125I]IMPY	Ab40	f	Osaka Peptide Institute (Osaka, Japan)	Ab1-40 peptides (final concentration: 100 nM) were dissolved in 10 mM potassium phosphate buffered saline (PBS, pH7.4) containing 1 mM EDTA and incubated at 37°C for 4 days with gentle and constant shaking. Aggregated Ab fibrils were stored at 4°C until used		Radioligand Displacement	The 100-uL aliquots of synthetic human Ab(1–40) fibrils werecombined with 900 uL of PBS containing [125I]IMPY (0.1 nM), 1% EtOH, and 20 mM ascorbic acid in the presence of compounds witha concentration ranging from 0.04 to 1000 nM. The reaction mixture was incubated at 37°C for 3 h, followed by vacuum filtrationthrough Whatman GF/B filters using a Brandel cell harvester (Model M-24R, Biomedical R…	InChI=1S/C16H11IN4/c17-13-5-6-16-19-15(10-21(16)9-13)12-3-1-11(2-4-12)14-7-8-18-20-14/h1-10H,(H,18,20)	InChI=1S/C16H11IN4/c17-13-5-6-16-19-15(10-21(16)9-13)12-3-1-11(2-4-12)14-7-8-18-20-14/h1-10H,(H,18,20)	386.196	3.996	90.9267	3	1	45.98	4	2	4	0	0	21	0	0	1	3	5	0	0	0	0.305385009	0.136976662	0.136976662	-0.305385009	16	4	21	0.761904762	0.19047619	0
IMPY	IC1=CN2C(C=C1)=NC(C3=CC=C(N(C)C)C=C3)=C2	10.1016/j.bmc.2014.05.043			2.83	2.83	2.93		-8.548213564	[125I]IMPY	Ab40	f	Osaka Peptide Institute (Osaka, Japan)	Ab1-40 peptides (final concentration: 100 nM) were dissolved in 10 mM potassium phosphate buffered saline (PBS, pH7.4) containing 1 mM EDTA and incubated at 37°C for 4 days with gentle and constant shaking. Aggregated Ab fibrils were stored at 4°C until used		Radioligand Displacement	The 100-uL aliquots of synthetic human Ab(1–40) fibrils werecombined with 900 uL of PBS containing [125I]IMPY (0.1 nM), 1% EtOH, and 20 mM ascorbic acid in the presence of compounds witha concentration ranging from 0.04 to 1000 nM. The reaction mixture was incubated at 37°C for 3 h, followed by vacuum filtrationthrough Whatman GF/B filters using a Brandel cell harvester (Model M-24R, Biomedical R…	InChI=1S/C15H14IN3/c1-18(2)13-6-3-11(4-7-13)14-10-19-9-12(16)5-8-15(19)17-14/h3-10H,1-2H3	InChI=1S/C15H14IN3/c1-18(2)13-6-3-11(4-7-13)14-10-19-9-12(16)5-8-15(19)17-14/h3-10H,1-2H3	363.202	3.6719	87.672	3	0	20.54	3	2	3	0	0.133333333	19	0	0	1	2	4	0	0	0	0.377660894	0.136976662	0.136976662	-0.377660894	15	3	19	0.789473684	0.157894737	0
[125I]DRM106	[125I]C1=CN2C(C=C1)=NC(C3=CC=C(C4=NNC=C4)C=C3)=C2	10.2967/jnumed.114.146944		1.5		1.5		0	-8.823908741		Ab40	f	Peptide Institute Inc	Ab1-40 peptides (final concentration: 100 nM) were dissolved in 10 mM potassium phosphate buffered saline (PBS, pH7.4) containing 1 mM EDTA and incubated at 37°C for 4 days with gentle and constant shaking. Aggregated Ab fibrils were stored at 4°C until used	Site 1	Radioligand Saturation	100-μL aliquots of Aβ fibril solutions (500 nM) were reacted with 900 μL of PBS containing ascorbic acid (final concentration: 20 mM) and 125I-DRM106 (20 kBq; final concentration was adjusted to serial concentrations of 0.2-100 nM for synthetic Aβ fibril by addition of unlabeled DRM106). The reaction mixture was incubated at 37°C for 1 h, followed by vacuum filtration through Whatman GF/B filters…	InChI=1S/C16H11IN4/c17-13-5-6-16-19-15(10-21(16)9-13)12-3-1-11(2-4-12)14-7-8-18-20-14/h1-10H,(H,18,20)/i17-2	InChI=1S/C16H11IN4/c17-13-5-6-16-19-15(10-21(16)9-13)12-3-1-11(2-4-12)14-7-8-18-20-14/h1-10H,(H,18,20)	384.1966302	3.996	90.9267	3	1	45.98	4	2	4	0	0	21	0	0	1	3	5	0	0	0	0.305385009	0.136976662	0.136976662	-0.305385009	16	4	21	0.761904762	0.19047619	0
[125I]DRM106	[125I]C1=CN2C(C=C1)=NC(C3=CC=C(C4=NNC=C4)C=C3)=C2	10.2967/jnumed.114.146944		1400		1400		36.6	-5.853871964		Ab40	f	Peptide Institute Inc	Ab1-40 peptides (final concentration: 100 nM) were dissolved in 10 mM potassium phosphate buffered saline (PBS, pH7.4) containing 1 mM EDTA and incubated at 37°C for 4 days with gentle and constant shaking. Aggregated Ab fibrils were stored at 4°C until used	Site 2	Radioligand Saturation	100-μL aliquots of Aβ fibril solutions (500 nM) were reacted with 900 μL of PBS containing ascorbic acid (final concentration: 20 mM) and 125I-DRM106 (20 kBq; final concentration was adjusted to serial concentrations of 0.2-100 nM for synthetic Aβ fibril by addition of unlabeled DRM106). The reaction mixture was incubated at 37°C for 1 h, followed by vacuum filtration through Whatman GF/B filters…	InChI=1S/C16H11IN4/c17-13-5-6-16-19-15(10-21(16)9-13)12-3-1-11(2-4-12)14-7-8-18-20-14/h1-10H,(H,18,20)/i17-2	InChI=1S/C16H11IN4/c17-13-5-6-16-19-15(10-21(16)9-13)12-3-1-11(2-4-12)14-7-8-18-20-14/h1-10H,(H,18,20)	384.1966302	3.996	90.9267	3	1	45.98	4	2	4	0	0	21	0	0	1	3	5	0	0	0	0.305385009	0.136976662	0.136976662	-0.305385009	16	4	21	0.761904762	0.19047619	0
[125I]DRM106	[125I]C1=CN2C(C=C1)=NC(C3=CC=C(C4=NNC=C4)C=C3)=C2	10.2967/jnumed.114.146944		10.1		10.1		5.1	-7.995678626		Ab42	f	Peptide Institute Inc	Ab1-42 peptides (final concentration: 100 nM) were dissolved in 10 mM potassium phosphate buffered saline (PBS, pH7.4) containing 1 mM EDTA and incubated at 37°C for 4 days with gentle and constant shaking. Aggregated Ab fibrils were stored at 4°C until used	Site 1	Radioligand Saturation	100-μL aliquots of Aβ fibril solutions (500 nM) were reacted with 900 μL of PBS containing ascorbic acid (final concentration: 20 mM) and 125I-DRM106 (20 kBq; final concentration was adjusted to serial concentrations of 0.2-100 nM for synthetic Aβ fibril by addition of unlabeled DRM106). The reaction mixture was incubated at 37°C for 1 h, followed by vacuum filtration through Whatman GF/B filters…	InChI=1S/C16H11IN4/c17-13-5-6-16-19-15(10-21(16)9-13)12-3-1-11(2-4-12)14-7-8-18-20-14/h1-10H,(H,18,20)/i17-2	InChI=1S/C16H11IN4/c17-13-5-6-16-19-15(10-21(16)9-13)12-3-1-11(2-4-12)14-7-8-18-20-14/h1-10H,(H,18,20)	384.1966302	3.996	90.9267	3	1	45.98	4	2	4	0	0	21	0	0	1	3	5	0	0	0	0.305385009	0.136976662	0.136976662	-0.305385009	16	4	21	0.761904762	0.19047619	0
[125I]DRM106	[125I]C1=CN2C(C=C1)=NC(C3=CC=C(C4=NNC=C4)C=C3)=C2	10.2967/jnumed.114.146944		2890		2890		344.5	-5.539102157		Ab42	f	Peptide Institute Inc	Ab1-42 peptides (final concentration: 100 nM) were dissolved in 10 mM potassium phosphate buffered saline (PBS, pH7.4) containing 1 mM EDTA and incubated at 37°C for 4 days with gentle and constant shaking. Aggregated Ab fibrils were stored at 4°C until used	Site 2	Radioligand Saturation	100-μL aliquots of Aβ fibril solutions (500 nM) were reacted with 900 μL of PBS containing ascorbic acid (final concentration: 20 mM) and 125I-DRM106 (20 kBq; final concentration was adjusted to serial concentrations of 0.2-100 nM for synthetic Aβ fibril by addition of unlabeled DRM106). The reaction mixture was incubated at 37°C for 1 h, followed by vacuum filtration through Whatman GF/B filters…	InChI=1S/C16H11IN4/c17-13-5-6-16-19-15(10-21(16)9-13)12-3-1-11(2-4-12)14-7-8-18-20-14/h1-10H,(H,18,20)/i17-2	InChI=1S/C16H11IN4/c17-13-5-6-16-19-15(10-21(16)9-13)12-3-1-11(2-4-12)14-7-8-18-20-14/h1-10H,(H,18,20)	384.1966302	3.996	90.9267	3	1	45.98	4	2	4	0	0	21	0	0	1	3	5	0	0	0	0.305385009	0.136976662	0.136976662	-0.305385009	16	4	21	0.761904762	0.19047619	0
[125I]DRM106	[125I]C1=CN2C(C=C1)=NC(C3=CC=C(C4=NNC=C4)C=C3)=C2	10.2967/jnumed.114.146944		4.2		4.2		0.92	-8.37675071		AD	b	AD brain homogenates	The homogenate of gray matter of the parahippocampal gyrus (85-year-old AD patient; Harvard Brain Tissue Resource Center and Analytical Biological Services, Inc.) was prepared using the same method.	Site 1	Radioligand Saturation	100-μL aliquots of brain homogenates (0.4 mg protein) were reacted with 900 μL of PBS containing ascorbic acid (final concentration: 20 mM) and 125I-DRM106 (20 kBq; final concentration was adjusted to serial concentrations of 0.1-500 nM for brain homogenate incubation solutions by addition of unlabeled DRM106). The reaction mixture was incubated at 37°C for 1 h, followed by vacuum filtration thro…	InChI=1S/C16H11IN4/c17-13-5-6-16-19-15(10-21(16)9-13)12-3-1-11(2-4-12)14-7-8-18-20-14/h1-10H,(H,18,20)/i17-2	InChI=1S/C16H11IN4/c17-13-5-6-16-19-15(10-21(16)9-13)12-3-1-11(2-4-12)14-7-8-18-20-14/h1-10H,(H,18,20)	384.1966302	3.996	90.9267	3	1	45.98	4	2	4	0	0	21	0	0	1	3	5	0	0	0	0.305385009	0.136976662	0.136976662	-0.305385009	16	4	21	0.761904762	0.19047619	0
[125I]DRM106	[125I]C1=CN2C(C=C1)=NC(C3=CC=C(C4=NNC=C4)C=C3)=C2	10.2967/jnumed.114.146944		264		264		160	-6.578396073		AD	b	AD brain homogenates	The homogenate of gray matter of the parahippocampal gyrus (85-year-old AD patient; Harvard Brain Tissue Resource Center and Analytical Biological Services, Inc.) was prepared using the same method.	Site 2	Radioligand Saturation	100-μL aliquots of brain homogenates (0.4 mg protein) were reacted with 900 μL of PBS containing ascorbic acid (final concentration: 20 mM) and 125I-DRM106 (20 kBq; final concentration was adjusted to serial concentrations of 0.1-500 nM for brain homogenate incubation solutions by addition of unlabeled DRM106). The reaction mixture was incubated at 37°C for 1 h, followed by vacuum filtration thro…	InChI=1S/C16H11IN4/c17-13-5-6-16-19-15(10-21(16)9-13)12-3-1-11(2-4-12)14-7-8-18-20-14/h1-10H,(H,18,20)/i17-2	InChI=1S/C16H11IN4/c17-13-5-6-16-19-15(10-21(16)9-13)12-3-1-11(2-4-12)14-7-8-18-20-14/h1-10H,(H,18,20)	384.1966302	3.996	90.9267	3	1	45.98	4	2	4	0	0	21	0	0	1	3	5	0	0	0	0.305385009	0.136976662	0.136976662	-0.305385009	16	4	21	0.761904762	0.19047619	0
[truncated: 3,083 more rows]
[truncated: 4 more columns]
